# Supplementary material for: Impairing one sensory modality enhances another by reconfiguring peptidergic signalling in Caenorhabditis elegans
Source: eLife. 2022 Feb 24;11:e68040. doi: 10.7554/eLife.68040 (PMC8871372; doi:10.7554/eLife.68040)
Supplement: Supplementary file 1. [file elife-68040-supp1.xlsx]

## Sheet: Gene expressed in ADL
Worm-ID	Name	|	Average expression (tpm)	|	Assigned neural function	Protein descritpion	|
WBGene00011289	R102.2	|	45699.4	|			|
WBGene00015354	snet-1	|	22940.1	|	Neuropeptide;Neuropeptide: Neuropeptide-like proteins		|
WBGene00007883	C33A12.4	|	19528.4	|			|
WBGene00001753	gst-5	|	14200.3	|		Probable glutathione S-transferase 5 [Source:UniProtKB/Swiss-Prot;Acc:Q09596]	|
WBGene00004424	rpl-12	|	11496	|		60S ribosomal protein L12 [Source:UniProtKB/Swiss-Prot;Acc:P61866]	|
WBGene00002017	hsp-16.11	|	10640.4	|		Heat shock protein Hsp-16.1/Hsp-16.11 [Source:UniProtKB/Swiss-Prot;Acc:P34696]	|
WBGene00002019	hsp-16.48	|	10289.6	|		Heat shock protein Hsp-16.48/Hsp-16.49 [Source:UniProtKB/Swiss-Prot;Acc:P02513]	|
WBGene00004431	rpl-19	|	10034.3	|		60S ribosomal protein L19 [Source:UniProtKB/Swiss-Prot;Acc:O02639]	|
WBGene00004419	rpl-7A	|	8535.49	|		60S ribosomal protein L7a [Source:UniProtKB/Swiss-Prot;Acc:Q966C6]	|
WBGene00008920	eef-1G	|	7942.42	|		Probable elongation factor 1-gamma [Source:UniProtKB/Swiss-Prot;Acc:P54412]	|
WBGene00009069	F23A7.4	|	7736.37	|			|
WBGene00006439	ant-1.1	|	7547.31	|		Adenine Nucleotide Translocator [Source:UniProtKB/TrEMBL;Acc:G3MU69]	|
WBGene00005432	srh-222	|	7483.24	|	Chemoreceptor;Chemoreceptor: Srh class	Serpentine Receptor, class H [Source:UniProtKB/TrEMBL;Acc:O76829]	|
WBGene00016788	C49G7.10	|	7196.29	|			|
WBGene00011392	sbt-1	|	6678.14	|		Seven B Two (Mammalian 7BT prohormone convertase chaperone) homolog [Source:UniProtKB/TrEMBL;Acc:Q9XTY3]	|
WBGene00017671	pgal-1	|	6673.09	|	Neuropeptide processing;Neuropeptide processing: Modification	Probable peptidyl-alpha-hydroxyglycine alpha-amidating lyase pgal-1 [Source:UniProtKB/Swiss-Prot;Acc:P91268]	|
WBGene00011156	rbm-3.2	|	6083.88	|		RNA Binding Motif protein homolog [Source:UniProtKB/TrEMBL;Acc:O45713]	|
WBGene00009692	F44E5.5	|	5617.71	|			|
WBGene00008840	F15A4.5	|	5474.69	|			|
WBGene00016783	irg-2	|	5330.3	|		Infection Response protein [Source:UniProtKB/TrEMBL;Acc:O16224]	|
WBGene00014307	F07H5.3	|	5197.72	|			|
WBGene00009119	ndk-1	|	4972.64	|		Nucleoside diphosphate kinase [Source:UniProtKB/TrEMBL;Acc:Q93576]	|
WBGene00001167	eef-2	|	4491.84	|		Elongation factor 2 [Source:UniProtKB/Swiss-Prot;Acc:P29691]	|
WBGene00012421	Y9C2UA.1	|	4154.01	|			|
WBGene00004415	rpl-4	|	4020.86	|		60S ribosomal protein L4 [Source:UniProtKB/Swiss-Prot;Acc:O02056]	|
WBGene00007604	xbx-9	|	3945.1	|		X-BoX promoter element regulated [Source:UniProtKB/TrEMBL;Acc:Q18017]	|
WBGene00001911	his-37	|	3804.91	|		Histone H4 [Source:UniProtKB/Swiss-Prot;Acc:P62784]	|
WBGene00009691	F44E5.4	|	3761.27	|			|
WBGene00004409	rla-1	|	3669.18	|		60S acidic ribosomal protein P1 [Source:UniProtKB/Swiss-Prot;Acc:P91913]	|
WBGene00004413	rpl-2	|	3533.8	|		60S ribosomal protein L8 [Source:UniProtKB/Swiss-Prot;Acc:Q9XVF7]	|
WBGene00004441	rpl-27	|	3531.78	|		60S ribosomal protein L27 [Source:UniProtKB/Swiss-Prot;Acc:P91914]	|
WBGene00001168	eef-1A.1	|	3264.7	|		Elongation factor 1-alpha [Source:UniProtKB/Swiss-Prot;Acc:P53013]	|
WBGene00010236	F58B4.3	|	3138.32	|			|
WBGene00271778	T01A4.9	|	2977.21	|			|
WBGene00004485	rps-16	|	2822.04	|		40S ribosomal protein S16 [Source:UniProtKB/Swiss-Prot;Acc:Q22054]	|
WBGene00004423	rpl-11.2	|	2815.16	|		60S ribosomal protein L11-2 [Source:UniProtKB/Swiss-Prot;Acc:Q19162]	|
WBGene00001189	egl-21	|	2620.71	|	Neuropeptide processing;Neuropeptide processing: Maturation	Carboxypeptidase E [Source:UniProtKB/Swiss-Prot;Acc:O17754]	|
WBGene00018846	eef-1B.1	|	2546.95	|		Probable elongation factor 1-beta/1-delta 1 [Source:UniProtKB/Swiss-Prot;Acc:P34460]	|
WBGene00010575	flp-25	|	2537.87	|	Neuropeptide;Neuropeptide: FMRFamides (31 flp genes)	FMRF-Like Peptide [Source:UniProtKB/TrEMBL;Acc:Q6LAC9]	|
WBGene00003902	pab-1	|	2513.55	|		Polyadenylate-binding protein [Source:UniProtKB/TrEMBL;Acc:Q7K797]	|
WBGene00004421	rpl-10	|	2375.36	|		60S ribosomal protein L10 [Source:UniProtKB/Swiss-Prot;Acc:Q09533]	|
WBGene00012005	jun-1	|	2374.8	|		Transcription factor jun-1 [Source:UniProtKB/Swiss-Prot;Acc:G5ECU7]	|
WBGene00004483	rps-14	|	2356.23	|		40S ribosomal protein S14 [Source:UniProtKB/Swiss-Prot;Acc:P48150]	|
WBGene00011644	T09B9.3	|	2332.94	|			|
WBGene00045272	F59C12.4	|	2309.83	|			|
WBGene00022144	pghm-1	|	2239.83	|	Neuropeptide processing;Neuropeptide processing: Modification	Probable peptidylglycine alpha-hydroxylating monooxygenase 1 [Source:UniProtKB/Swiss-Prot;Acc:Q95XM2]	|
WBGene00004482	rps-13	|	2197	|		40S ribosomal protein S13 [Source:UniProtKB/Swiss-Prot;Acc:P51404]	|
WBGene00001447	flp-4	|	2178.64	|	Neuropeptide;Neuropeptide: FMRFamides (31 flp genes)	FMRF-Like Peptide; FMRFamide-like peptide 4 [Source:UniProtKB/TrEMBL;Acc:G5EG31]	|
WBGene00017267	numr-2	|	2153.14	|		NUclear localized Metal Responsive [Source:UniProtKB/TrEMBL;Acc:Q19209]	|
WBGene00004496	rps-27	|	2042.73	|		40S ribosomal protein S27 [Source:UniProtKB/Swiss-Prot;Acc:Q9TXP0]	|
WBGene00000066	act-4	|	2037.1	|		Actin-4 [Source:UniProtKB/Swiss-Prot;Acc:P10986]	|
WBGene00001772	gst-24	|	2036.21	|		Glutathione S-Transferase [Source:UniProtKB/TrEMBL;Acc:Q93694]	|
WBGene00004430	rpl-18	|	2025.12	|		60S ribosomal protein L18 [Source:UniProtKB/Swiss-Prot;Acc:O45946]	|
WBGene00007408	C07B5.3	|	2016.19	|			|
WBGene00009122	tct-1	|	2013.93	|		Translationally-controlled tumor protein homolog [Source:UniProtKB/Swiss-Prot;Acc:Q93573]	|
WBGene00004473	rps-4	|	2009.08	|		40S ribosomal protein S4 [Source:UniProtKB/Swiss-Prot;Acc:Q9N3X2]	|
WBGene00194689	Y38H6C.24	|	1960.74	|			|
WBGene00044009	ZK822.6	|	1956.72	|			|
WBGene00007345	C05E7.3	|	1952.35	|			|
WBGene00004425	rpl-13	|	1930.85	|		60S ribosomal protein L13 [Source:UniProtKB/Swiss-Prot;Acc:P91128]	|
WBGene00004472	rps-3	|	1913.36	|		40S ribosomal protein S3 [Source:UniProtKB/Swiss-Prot;Acc:P48152]	|
WBGene00012760	Y41C4A.17	|	1911.21	|			|
WBGene00004449	rpl-35	|	1902.31	|		60S ribosomal protein L35 [Source:UniProtKB/Swiss-Prot;Acc:P34662]	|
WBGene00235320	R02F11.11	|	1885.58	|			|
WBGene00004477	rps-8	|	1873.62	|		40S ribosomal protein S8 [Source:UniProtKB/Swiss-Prot;Acc:P48156]	|
WBGene00235164	K09F6.13	|	1815.7	|			|
WBGene00010556	rack-1	|	1761.04	|		Guanine nucleotide-binding protein subunit beta-2-like 1 [Source:UniProtKB/Swiss-Prot;Acc:Q21215]	|
WBGene00019324	K02F2.5	|	1742.99	|			|
WBGene00006728	ubq-2	|	1724.86	|		Ubiquitin-60S ribosomal protein L40 Ubiquitin 60S ribosomal protein L40 [Source:UniProtKB/Swiss-Prot;Acc:P49632]	|
WBGene00010419	atp-1	|	1722.68	|		ATP synthase subunit alpha, mitochondrial [Source:UniProtKB/Swiss-Prot;Acc:Q9XXK1]	|
WBGene00023068	rpl-41.2	|	1716.18	|		Ribosomal Protein, Large subunit [Source:UniProtKB/TrEMBL;Acc:A0A0M6VD87]	|
WBGene00045331	F14D7.12	|	1705.1	|			|
WBGene00019593	K09F6.10	|	1702.07	|			|
WBGene00014309	F07H5.5	|	1648.33	|			|
WBGene00004438	rpl-25.1	|	1645.21	|		60S ribosomal protein L23a 1 [Source:UniProtKB/Swiss-Prot;Acc:P48162]	|
WBGene00011059	R06C1.4	|	1596.44	|			|
WBGene00000277	cab-1	|	1592.85	|			|
WBGene00021350	Y37E3.8	|	1588.89	|			|
WBGene00044638	F23A7.8	|	1588.81	|			|
WBGene00004414	rpl-3	|	1576.53	|		60S ribosomal protein L3 [Source:UniProtKB/Swiss-Prot;Acc:P50880]	|
WBGene00015996	C18H7.6	|	1568.18	|			|
WBGene00001169	eef-1A.2	|	1520.78	|		Elongation factor 1-alpha [Source:UniProtKB/Swiss-Prot;Acc:P53013]	|
WBGene00019564	K09D9.1	|	1474.15	|			|
WBGene00010559	K04D7.6	|	1468.92	|			|
WBGene00001915	his-41	|	1468.09	|		Probable histone H2B 3 [Source:UniProtKB/Swiss-Prot;Acc:Q27484]	|
WBGene00004470	rps-1	|	1465.03	|		40S ribosomal protein S3a [Source:UniProtKB/Swiss-Prot;Acc:P48154]	|
WBGene00001951	hlh-4	|	1462.34	|		Helix-loop-helix protein 4 [Source:UniProtKB/Swiss-Prot;Acc:P34555]	|
WBGene00010962	ctc-3	|	1455.51	|		Cytochrome c oxidase subunit 3 [Source:UniProtKB/Swiss-Prot;Acc:P24891]	|
WBGene00004428	rpl-16	|	1407.61	|		60S ribosomal protein L13a [Source:UniProtKB/Swiss-Prot;Acc:Q27389]	|
WBGene00004469	rps-0	|	1406.5	|		40S ribosomal protein SA [Source:UniProtKB/Swiss-Prot;Acc:P46769]	|
WBGene00013307	Y57G11C.9	|	1402.9	|			|
WBGene00000915	hsp-90	|	1393.65	|		Heat shock protein 90 [Source:UniProtKB/Swiss-Prot;Acc:Q18688]	|
WBGene00022465	Y110A7A.20	|	1387.65	|	Sensory cilia transport;Sensory cilia transport: IFT-B	Intraflagellar transport protein 20 homolog [Source:UniProtKB/Swiss-Prot;Acc:Q8TA52]	|
WBGene00004471	rps-2	|	1376.48	|		40S ribosomal protein S2 [Source:UniProtKB/Swiss-Prot;Acc:P51403]	|
WBGene00004433	rpl-21	|	1371.66	|		60S ribosomal protein L21 [Source:UniProtKB/Swiss-Prot;Acc:P34334]	|
WBGene00004481	rps-12	|	1362.02	|		40S ribosomal protein S12 [Source:UniProtKB/Swiss-Prot;Acc:P49196]	|
WBGene00004489	rps-20	|	1361.24	|		Ribosomal Protein, Small subunit [Source:UniProtKB/TrEMBL;Acc:Q8WQA8]	|
WBGene00019536	rpi-2	|	1360.99	|			|
WBGene00004418	rpl-7	|	1360	|		60S ribosomal protein L7 [Source:UniProtKB/Swiss-Prot;Acc:O01802]	|
WBGene00000713	col-140	|	1288.36	|		COLlagen [Source:UniProtKB/TrEMBL;Acc:Q19813]	|
WBGene00012853	Y44A6D.2	|	1274.07	|			|
WBGene00044644	B0205.13	|	1271.59	|			|
WBGene00004492	rps-23	|	1262.85	|		40S ribosomal protein S23 [Source:UniProtKB/Swiss-Prot;Acc:Q19877]	|
WBGene00000698	col-124	|	1252.75	|		COLlagen [Source:UniProtKB/TrEMBL;Acc:Q9NAR3]	|
WBGene00010965	ctc-2	|	1244.32	|		Cytochrome c oxidase subunit 2 [Source:UniProtKB/Swiss-Prot;Acc:P24894]	|
WBGene00009633	F42E11.3	|	1242.12	|			|
WBGene00002115	ins-32	|	1217.07	|	Neuropeptide;Neuropeptide: Insulin-related peptides	INSulin related [Source:UniProtKB/TrEMBL;Acc:Q9TYK2]	|
WBGene00004416	rpl-5	|	1209.73	|		60S ribosomal protein L5 [Source:UniProtKB/Swiss-Prot;Acc:P49405]	|
WBGene00045208	F13E9.15	|	1188.54	|			|
WBGene00003920	par-5	|	1187.1	|		14-3-3-like protein 1 [Source:UniProtKB/Swiss-Prot;Acc:P41932]	|
WBGene00002265	lec-2	|	1176.73	|		Galectin [Source:UniProtKB/TrEMBL;Acc:Q20684]	|
WBGene00004480	rps-11	|	1166.03	|		Ribosomal Protein, Small subunit [Source:UniProtKB/TrEMBL;Acc:Q20206]	|
WBGene00000668	col-93	|	1160.91	|		COLlagen [Source:UniProtKB/TrEMBL;Acc:Q9U348]	|
WBGene00019732	M02D8.6	|	1158.73	|			|
WBGene00016530	C39D10.2	|	1140.11	|			|
WBGene00004450	rpl-36	|	1123.97	|		60S ribosomal protein L36 [Source:UniProtKB/Swiss-Prot;Acc:P49181]	|
WBGene00001909	his-35	|	1108.51	|		Histone H2A [Source:UniProtKB/TrEMBL;Acc:Q27485]	|
WBGene00004499	rps-30	|	1091.13	|		40S ribosomal protein S30 [Source:UniProtKB/TrEMBL;Acc:Q18231]	|
WBGene00004447	rpl-33	|	1089.36	|		60S ribosomal protein L35a [Source:UniProtKB/Swiss-Prot;Acc:P49180]	|
WBGene00018637	F49E8.6	|	1088.89	|			|
WBGene00003851	odr-4	|	1076.63	|		Odorant response abnormal protein 4 [Source:UniProtKB/Swiss-Prot;Acc:Q8I7F8]	|
WBGene00019466	tos-1	|	1068.44	|		Target Of Splicing [Source:UniProtKB/TrEMBL;Acc:Q95R01]	|
WBGene00004486	rps-17	|	1062.63	|		40S ribosomal protein S17 [Source:UniProtKB/Swiss-Prot;Acc:O01692]	|
WBGene00044144	M153.4	|	1057.9	|			|
WBGene00004408	rla-0	|	1057	|		60S acidic ribosomal protein P0 [Source:UniProtKB/Swiss-Prot;Acc:Q93572]	|
WBGene00002018	hsp-16.41	|	1040.78	|		Heat shock protein Hsp-16.41 [Source:UniProtKB/Swiss-Prot;Acc:P06581]	|
WBGene00016493	C37A2.7	|	1039.1	|		60S acidic ribosomal protein P2 [Source:UniProtKB/Swiss-Prot;Acc:O01504]	|
WBGene00006959	xbp-1	|	1037.69	|		X-box Binding Protein homolog; X-box binding protein unprocessed isoform [Source:UniProtKB/TrEMBL;Acc:G5EE07]	|
WBGene00004478	rps-9	|	1018.63	|		40S ribosomal protein S9 [Source:UniProtKB/Swiss-Prot;Acc:Q20228]	|
WBGene00002005	hsp-1	|	1013.51	|		Heat shock 70 kDa protein A [Source:UniProtKB/Swiss-Prot;Acc:P09446]	|
WBGene00000712	col-139	|	1009.2	|		COLlagen [Source:UniProtKB/TrEMBL;Acc:Q20282]	|
WBGene00017813	nlp-61	|	1000.92	|	Neuropeptide;Neuropeptide: Neuropeptide-like proteins	Neuropeptide-Like Protein [Source:UniProtKB/TrEMBL;Acc:Q19806]	|
WBGene00005377	srh-161	|	1000.26	|			|
WBGene00044646	B0205.14	|	996.827	|			|
WBGene00009901	F49E12.8	|	988.282	|			|
WBGene00008453	E02A10.3	|	978.597	|	Calcium binding protein;Calcium binding protein: Others		|
WBGene00011500	T05G5.5	|	978.25	|		Dephospho-CoA kinase 2 [Source:UniProtKB/TrEMBL;Acc:E5QCF8]	|
WBGene00000403	casy-1	|	971.265	|	Cadherin	CAlSYntenin/Alcadein homolog; Calsyntenin [Source:UniProtKB/TrEMBL;Acc:G5ED46]	|
WBGene00010964	ctc-1	|	970.085	|		Cytochrome c oxidase subunit 1 [Source:UniProtKB/Swiss-Prot;Acc:P24893]	|
WBGene00086556	F36D1.12	|	963.38	|			|
WBGene00006180	str-131	|	952.531	|		Seven TM Receptor [Source:UniProtKB/TrEMBL;Acc:O16332]	|
WBGene00010507	K02E2.6	|	951.403	|			|
WBGene00000188	arl-3	|	946.257	|		ADP-ribosylation factor-like protein 3 [Source:UniProtKB/Swiss-Prot;Acc:O45379]	|
WBGene00004494	rps-25	|	944.519	|		40S ribosomal protein S25 [Source:UniProtKB/Swiss-Prot;Acc:P52821]	|
WBGene00001196	egl-30	|	940.926	|	GPCR signalling;GPCR signalling: Gα	EGL-30; Heterotrimeric G protein alpha subunit [Source:UniProtKB/TrEMBL;Acc:G5EGU1]	|
WBGene00012132	ifta-2	|	928.422	|	Sensory cilia transport;Sensory cilia transport: IFT-B	Intraflagellar transport associated protein 2 [Source:UniProtKB/Swiss-Prot;Acc:Q9XUC2]	|
WBGene00004487	rps-18	|	921.072	|		Ribosomal Protein, Small subunit [Source:UniProtKB/TrEMBL;Acc:O18240]	|
WBGene00019327	zip-2	|	916.627	|		BZIP transcription factor family [Source:UniProtKB/TrEMBL;Acc:Q21148]	|
WBGene00004476	rps-7	|	912.82	|		40S ribosomal protein S7 [Source:UniProtKB/Swiss-Prot;Acc:Q23312]	|
WBGene00004446	rpl-32	|	910.8	|		Ribosomal Protein, Large subunit [Source:UniProtKB/TrEMBL;Acc:Q22716]	|
WBGene00004493	rps-24	|	909.232	|		Ribosomal Protein, Small subunit [Source:UniProtKB/TrEMBL;Acc:Q1XFY9]	|
WBGene00011474	aldo-1	|	905.217	|		Fructose-bisphosphate aldolase 1 [Source:UniProtKB/Swiss-Prot;Acc:P54216]	|
WBGene00008922	F17C11.11	|	890.702	|			|
WBGene00004417	rpl-6	|	882.206	|		60S ribosomal protein L6 [Source:UniProtKB/Swiss-Prot;Acc:P47991]	|
WBGene00004452	rpl-38	|	878.073	|		60S ribosomal protein L38 [Source:UniProtKB/Swiss-Prot;Acc:O17570]	|
WBGene00010603	nhr-198	|	877.667	|		Nuclear Hormone Receptor family [Source:UniProtKB/TrEMBL;Acc:O45664]	|
WBGene00022419	Y102A11A.9	|	863.83	|			|
WBGene00002016	hsp-16.2	|	856.658	|		Heat shock protein Hsp-16.2 [Source:UniProtKB/Swiss-Prot;Acc:P06582]	|
WBGene00004436	rpl-24.1	|	850.932	|		60S ribosomal protein L24 [Source:UniProtKB/Swiss-Prot;Acc:O01868]	|
WBGene00018213	F39H12.2	|	850.684	|			|
WBGene00010974	bbs-5	|	836.286	|	Sensory cilia transport;Sensory cilia transport: BBSome	Bardet-Biedl syndrome 5 protein homolog [Source:UniProtKB/Swiss-Prot;Acc:Q21626]	|
WBGene00004454	rpl-36.A	|	827.338	|		Ribosomal protein rpl-36.A [Source:UniProtKB/Swiss-Prot;Acc:P48166]	|
WBGene00004484	rps-15	|	818.835	|		40S ribosomal protein S15 [Source:UniProtKB/Swiss-Prot;Acc:Q9XVP0]	|
WBGene00004412	rpl-1	|	817.058	|		60S ribosomal protein L10a [Source:UniProtKB/Swiss-Prot;Acc:Q9N4I4]	|
WBGene00008434	D2089.3	|	815.397	|			|
WBGene00020844	T27A10.2	|	810.492	|			|
WBGene00009716	F44G4.7	|	810.362	|			|
WBGene00194713	F19B10.13	|	796.272	|			|
WBGene00022248	Y73B6BL.27	|	791.927	|			|
WBGene00015053	B0222.1	|	786.916	|			|
WBGene00004432	rpl-20	|	784.825	|		60S ribosomal protein L18a [Source:UniProtKB/Swiss-Prot;Acc:O44480]	|
WBGene00006537	tbb-2	|	782.149	|		Tubulin beta-2 chain [Source:UniProtKB/Swiss-Prot;Acc:P52275]	|
WBGene00006434	prdx-2	|	780.734	|		PeRoxireDoXin [Source:UniProtKB/TrEMBL;Acc:H2KZL7]	|
WBGene00008454	E02A10.4	|	779.382	|			|
WBGene00020144	T01C8.3	|	776.204	|			|
WBGene00001755	gst-7	|	766.223	|		Probable glutathione S-transferase 7 [Source:UniProtKB/Swiss-Prot;Acc:P91253]	|
WBGene00044028	nlp-63	|	762.319	|	Neuropeptide;Neuropeptide: Neuropeptide-like proteins	Neuropeptide-Like Protein [Source:UniProtKB/TrEMBL;Acc:Q5FC76]	|
WBGene00010960	atp-6	|	757.185	|		ATP synthase subunit a [Source:UniProtKB/Swiss-Prot;Acc:P24888]	|
WBGene00007553	C13G3.1	|	754.359	|			|
WBGene00004488	rps-19	|	738.315	|		40S ribosomal protein S19 [Source:UniProtKB/Swiss-Prot;Acc:O18650]	|
WBGene00004442	rpl-28	|	737.619	|		60S ribosomal protein L28 [Source:UniProtKB/Swiss-Prot;Acc:Q21930]	|
WBGene00019995	R10F2.4	|	737.244	|			|
WBGene00010957	nduo-6	|	733.639	|		NADH-ubiquinone oxidoreductase chain 6 [Source:UniProtKB/Swiss-Prot;Acc:P24885]	|
WBGene00077593	C49G7.12	|	731.37	|			|
WBGene00017597	F19C7.8	|	725.241	|			|
WBGene00004420	rpl-9	|	720.563	|		60S ribosomal protein L9 [Source:UniProtKB/Swiss-Prot;Acc:Q95Y90]	|
WBGene00004427	rpl-15	|	720.275	|		60S ribosomal protein L15 [Source:UniProtKB/Swiss-Prot;Acc:P91374]	|
WBGene00001745	gsa-1	|	708.063	|	GPCR signalling;GPCR signalling: Gα	G protein, Subunit Alpha [Source:UniProtKB/TrEMBL;Acc:Q7KPV0]	|
WBGene00002097	ins-14	|	707.822	|	Neuropeptide;Neuropeptide: Insulin-related peptides	INSulin related [Source:UniProtKB/TrEMBL;Acc:Q7JP82]	|
WBGene00010864	xbx-3	|	703.089	|		X-BoX promoter element regulated [Source:UniProtKB/TrEMBL;Acc:Q21511]	|
WBGene00004475	rps-6	|	698.971	|		40S ribosomal protein S6 [Source:UniProtKB/Swiss-Prot;Acc:Q9NEN6]	|
WBGene00000751	col-178	|	698.274	|		COLlagen [Source:UniProtKB/TrEMBL;Acc:O17641]	|
WBGene00004479	rps-10	|	696.581	|		Ribosomal Protein, Small subunit [Source:UniProtKB/TrEMBL;Acc:O01869]	|
WBGene00012179	W01D2.1	|	694.529	|		Ribosomal protein L37 [Source:UniProtKB/TrEMBL;Acc:O62388]	|
WBGene00016126	nhr-258	|	687.69	|		Nuclear Hormone Receptor family [Source:UniProtKB/TrEMBL;Acc:Q18190]	|
WBGene00004474	rps-5	|	674.87	|		40S ribosomal protein S5 [Source:UniProtKB/Swiss-Prot;Acc:P49041]	|
WBGene00001119	dyf-3	|	666.465	|	Sensory cilia transport;Sensory cilia transport: IFT-B	Clusterin-associated protein 1 homolog [Source:UniProtKB/Swiss-Prot;Acc:Q6I6D4]	|
WBGene00004445	rpl-31	|	665.581	|		60S ribosomal protein L31 [Source:UniProtKB/Swiss-Prot;Acc:Q9U332]	|
WBGene00009580	xbx-6	|	659.424	|		X-BoX promoter element regulated [Source:UniProtKB/TrEMBL;Acc:Q8MQ56]	|
WBGene00020249	T05C1.2	|	652.305	|			|
WBGene00004346	rgs-3	|	650.754	|	GPCR signalling;GPCR signalling: RGS family	Regulator of G-protein signaling rgs-3 [Source:UniProtKB/Swiss-Prot;Acc:Q18312]	|
WBGene00006529	tba-2	|	650.722	|		Tubulin alpha-2 chain [Source:UniProtKB/Swiss-Prot;Acc:P34690]	|
WBGene00000609	col-20	|	649.725	|		COLlagen [Source:UniProtKB/TrEMBL;Acc:P91249]	|
WBGene00005372	srh-156	|	647.927	|			|
WBGene00004281	rab-28	|	644.897	|		Ras-related protein Rab-28 [Source:UniProtKB/Swiss-Prot;Acc:Q9XWR6]	|
WBGene00000657	col-81	|	642.889	|		COLlagen [Source:UniProtKB/TrEMBL;Acc:Q20135]	|
WBGene00001788	gst-40	|	637.82	|		Glutathione S-Transferase [Source:UniProtKB/TrEMBL;Acc:O45115]	|
WBGene00012148	inos-1	|	627.127	|		INOsitol-3-phosphate Synthase [Source:UniProtKB/TrEMBL;Acc:G5ED01]	|
WBGene00004439	rpl-25.2	|	624.471	|		60S ribosomal protein L23a 2 [Source:UniProtKB/Swiss-Prot;Acc:Q20647]	|
WBGene00003756	nlp-18	|	620.454	|	Neuropeptide;Neuropeptide: Neuropeptide-like proteins	Neuropeptide-Like Protein [Source:UniProtKB/TrEMBL;Acc:O62211]	|
WBGene00007247	C01G12.7	|	620.45	|			|
WBGene00000703	col-129	|	617.415	|		COLlagen [Source:UniProtKB/TrEMBL;Acc:Q21556]	|
WBGene00000534	cpi-2	|	616.738	|		Cystatin [Source:UniProtKB/TrEMBL;Acc:G5ECM9]	|
WBGene00004435	rpl-23	|	613.752	|		60S ribosomal protein L23 [Source:UniProtKB/Swiss-Prot;Acc:P48158]	|
WBGene00044387	C27A2.8	|	606.539	|			|
WBGene00014308	F07H5.4	|	602.208	|			|
WBGene00021416	mksr-2	|	599.734	|		MecKel Syndrome 1 (MKS1)-Related [Source:UniProtKB/TrEMBL;Acc:Q9N423]	|
WBGene00008476	E03H4.8	|	597.711	|			|
WBGene00004456	rpl-43	|	597.188	|		60S ribosomal protein L37a [Source:UniProtKB/Swiss-Prot;Acc:Q9U2A8]	|
WBGene00017121	cyc-2.1	|	591.585	|		Cytochrome c 2.1 [Source:UniProtKB/Swiss-Prot;Acc:P19974]	|
WBGene00017014	dylt-2	|	589.918	|	Dynein motors;Dynein motors: Light chain (Tctex1-type)	DYnein Light chain (Tctex type) [Source:UniProtKB/TrEMBL;Acc:Q18917]	|
WBGene00000097	aip-1	|	589.759	|		Arsenite Inducible Protein [Source:UniProtKB/TrEMBL;Acc:Q9XUW8]	|
WBGene00004207	ptb-1	|	582.738	|		PTB (HnRNP) homolog; Putative RNA-binding protein PTB-1a [Source:UniProtKB/TrEMBL;Acc:Q18999]	|
WBGene00019482	K07C11.10	|	581.842	|			|
WBGene00020931	cytb-5.2	|	579.963	|		YTochrome B [Source:UniProtKB/TrEMBL;Acc:O01816]	|
WBGene00010632	K07C5.9	|	578.143	|			|
WBGene00004434	rpl-22	|	577.885	|		60S ribosomal protein L22 [Source:UniProtKB/Swiss-Prot;Acc:P52819]	|
WBGene00000699	col-125	|	577.355	|		COLlagen [Source:UniProtKB/TrEMBL;Acc:Q18302]	|
WBGene00005484	srh-279	|	573.112	|	Chemoreceptor;Chemoreceptor: Srh class	Serpentine Receptor, class H [Source:UniProtKB/TrEMBL;Acc:O17787]	|
WBGene00004807	skr-1	|	566.583	|		Skp1-related protein [Source:UniProtKB/Swiss-Prot;Acc:G5ECU1]	|
WBGene00000656	col-80	|	565.21	|		Putative cuticle collagen 80 [Source:UniProtKB/Swiss-Prot;Acc:Q09456]	|
WBGene00007809	C29F4.3	|	561.85	|			|
WBGene00004495	rps-26	|	559.205	|		40S ribosomal protein S26 [Source:UniProtKB/Swiss-Prot;Acc:O45499]	|
WBGene00004429	rpl-17	|	558.408	|		60S ribosomal protein L17 [Source:UniProtKB/Swiss-Prot;Acc:Q9BL19]	|
WBGene00021556	Y45G5AM.3	|	553.786	|			|
WBGene00021254	Y22D7AL.16	|	553.331	|			|
WBGene00003963	pdi-2	|	549.211	|		Protein disulfide-isomerase 2 [Source:UniProtKB/Swiss-Prot;Acc:Q17770]	|
WBGene00006779	unc-43	|	548.575	|		Calcium/calmodulin-dependent protein kinase type II [Source:UniProtKB/Swiss-Prot;Acc:O62305]	|
WBGene00001448	flp-5	|	546.223	|	Neuropeptide;Neuropeptide: FMRFamides (31 flp genes)	FMRFamide-like neuropeptides 5 APKPKFIRF-amide AGAKFIRF-amide GAKFIRF-amide [Source:UniProtKB/Swiss-Prot;Acc:O61466]	|
WBGene00004345	rgs-2	|	536.082	|	GPCR signalling;GPCR signalling: RGS family	Regulator of G-protein signaling rgs-2 [Source:UniProtKB/Swiss-Prot;Acc:P49808]	|
WBGene00002262	ldh-1	|	534.753	|		L-lactate dehydrogenase [Source:UniProtKB/Swiss-Prot;Acc:Q27888]	|
WBGene00195086	F21C10.13	|	532.798	|			|
WBGene00019840	R02F11.2	|	532.183	|			|
WBGene00011974	xbx-5	|	532.075	|		X-BoX promoter element regulated [Source:UniProtKB/TrEMBL;Acc:Q22709]	|
WBGene00009995	F53F4.13	|	530.525	|			|
WBGene00016635	C44B11.6	|	529.722	|			|
WBGene00001684	gpd-2	|	527.932	|		Glyceraldehyde-3-phosphate dehydrogenase 2 [Source:UniProtKB/Swiss-Prot;Acc:P17329]	|
WBGene00020747	T24A6.7	|	526.282	|			|
WBGene00006725	ubl-1	|	525.295	|		Ubiquitin-like protein 1-40S ribosomal protein S27a Ubiquitin-like protein 1 40S ribosomal protein S27a [Source:UniProtKB/Swiss-Prot;Acc:P37165]	|
WBGene00004444	rpl-30	|	516.928	|		Ribosomal Protein, Large subunit [Source:UniProtKB/TrEMBL;Acc:I2HAJ2]	|
WBGene00268206	F54E2.9	|	515.691	|			|
WBGene00004302	ran-1	|	510.969	|		GTP-binding nuclear protein ran-1 [Source:UniProtKB/Swiss-Prot;Acc:O17915]	|
WBGene00011288	R102.1	|	508.752	|			|
WBGene00008184	C49A1.1	|	499.667	|			|
WBGene00000696	col-122	|	496.019	|		COLlagen [Source:UniProtKB/TrEMBL;Acc:Q22183]	|
WBGene00003000	lin-11	|	495.751	|			|
WBGene00001502	ftt-2	|	490.396	|		14-3-3-like protein 2 [Source:UniProtKB/Swiss-Prot;Acc:Q20655]	|
WBGene00005331	srh-112	|	489.489	|	Chemoreceptor;Chemoreceptor: Srh class	Serpentine Receptor, class H [Source:UniProtKB/TrEMBL;Acc:O45793]	|
WBGene00005205	srg-48	|	489.039	|	Chemoreceptor;Chemoreceptor: Srg class	Serpentine receptor class gamma [Source:UniProtKB/TrEMBL;Acc:Q86B42]	|
WBGene00001685	gpd-3	|	489.027	|		Glyceraldehyde-3-phosphate dehydrogenase 3 [Source:UniProtKB/Swiss-Prot;Acc:P17330]	|
WBGene00249817	F42G8.19	|	486.196	|			|
WBGene00018298	nlp-50	|	482.479	|	Neuropeptide;Neuropeptide: Neuropeptide-like proteins	Neuropeptide-Like Protein [Source:UniProtKB/TrEMBL;Acc:Q20295]	|
WBGene00003934	pat-10	|	481.925	|	Calcium binding protein;Calcium binding protein: Others	Paralysed Arrest at Two-fold; Troponin C [Source:UniProtKB/TrEMBL;Acc:G5EF37]	|
WBGene00045396	ZC334.12	|	481.049	|			|
WBGene00004467	rpn-11	|	480.951	|		26S proteasome non-ATPase regulatory subunit 14 [Source:UniProtKB/Swiss-Prot;Acc:O76577]	|
WBGene00003175	mec-12	|	480.537	|		Tubulin alpha-3 chain Detyrosinated tubulin alpha-3 chain [Source:UniProtKB/Swiss-Prot;Acc:P91910]	|
WBGene00011977	T24B8.3	|	479.603	|			|
WBGene00303007	Y57G11C.1147	|	477.5	|			|
WBGene00016647	fbxc-4	|	477.365	|		F-box C protein [Source:UniProtKB/TrEMBL;Acc:G5EG90]	|
WBGene00004440	rpl-26	|	477.185	|		60S ribosomal protein L26 [Source:UniProtKB/Swiss-Prot;Acc:Q19869]	|
WBGene00020196	T03G11.3	|	473.534	|		Zinc finger C2HC domain-containing protein T03G11.3 [Source:UniProtKB/Swiss-Prot;Acc:Q22122]	|
WBGene00013311	sec-61	|	473.248	|		Yeast SEC homolog [Source:UniProtKB/TrEMBL;Acc:G3MU88]	|
WBGene00009141	ncbp-2	|	472.473	|		Nuclear cap-binding protein subunit 2 [Source:UniProtKB/Swiss-Prot;Acc:Q93594]	|
WBGene00009732	cope-1	|	472.424	|		Coatomer subunit epsilon [Source:UniProtKB/Swiss-Prot;Acc:O62246]	|
WBGene00002189	kin-1	|	472.324	|		cAMP-dependent protein kinase catalytic subunit [Source:UniProtKB/Swiss-Prot;Acc:P21137]	|
WBGene00001681	gpc-1	|	470.36	|	GPCR signalling;GPCR signalling: Gγ	Guanine nucleotide-binding protein subunit gamma [Source:UniProtKB/Swiss-Prot;Acc:P54406]	|
WBGene00006630	tsp-4	|	469.892	|		Tetraspanin [Source:UniProtKB/TrEMBL;Acc:Q20707]	|
WBGene00003745	nlp-7	|	467.741	|	Neuropeptide;Neuropeptide: Neuropeptide-like proteins	Neuropeptide-like protein 7 [Source:UniProtKB/Swiss-Prot;Acc:Q19569]	|
WBGene00004426	rpl-14	|	465.579	|		Ribosomal Protein, Large subunit [Source:UniProtKB/TrEMBL;Acc:Q9XVE9]	|
WBGene00023476	srz-55	|	465.005	|			|
WBGene00011480	enpl-1	|	460.724	|		Endoplasmin homolog [Source:UniProtKB/Swiss-Prot;Acc:Q22235]	|
WBGene00000802	crt-1	|	460.01	|		Calreticulin [Source:UniProtKB/Swiss-Prot;Acc:P27798]	|
WBGene00018519	F46H5.3	|	457.813	|		Probable arginine kinase F46H5.3 [Source:UniProtKB/Swiss-Prot;Acc:Q10454]	|
WBGene00004443	rpl-29	|	457.127	|		60S ribosomal protein L29 [Source:UniProtKB/TrEMBL;Acc:O45226]	|
WBGene00005327	srh-108	|	449.611	|			|
WBGene00011545	T06G6.3	|	448.813	|			|
WBGene00001999	hrp-1	|	447.481	|		Heterogeneous nuclear ribonucleoprotein A1 [Source:UniProtKB/Swiss-Prot;Acc:Q22037]	|
WBGene00185118	K02E2.11	|	446.622	|			|
WBGene00018869	rfip-1	|	445.238	|		Rab-11 Family Interacting-Protein [Source:UniProtKB/TrEMBL;Acc:Q95ZS6]	|
WBGene00001558	gdi-1	|	443.676	|		Rab GDP dissociation inhibitor [Source:UniProtKB/TrEMBL;Acc:E9P8A8]	|
WBGene00021349	arl-13	|	442.812	|		ADP-ribosylation factor-like protein 13B [Source:UniProtKB/Swiss-Prot;Acc:H2L0N8]	|
WBGene00022568	ZC239.5	|	441.083	|			|
WBGene00000757	col-184	|	436.625	|		COLlagen [Source:UniProtKB/TrEMBL;Acc:Q19470]	|
WBGene00006802	unc-69	|	431.845	|		Short coiled-coil domain-containing protein UNC-69 splice variant T07A5.6b [Source:UniProtKB/TrEMBL;Acc:G5EDQ5]	|
WBGene00004924	snt-4	|	431.118	|	Synaptic release machinery;Synaptic release machinery: synaptotagmin	SyNapTotagmin [Source:UniProtKB/TrEMBL;Acc:P91493]	|
WBGene00019253	H31G24.1	|	430.636	|			|
WBGene00000691	col-117	|	430.605	|		COLlagen; COLlagen structural [Source:UniProtKB/TrEMBL;Acc:G5EDG6]	|
WBGene00015655	C09G12.5	|	430.418	|			|
WBGene00194982	Y17D7B.10	|	427.845	|			|
WBGene00005330	srh-111	|	422.059	|	Chemoreceptor;Chemoreceptor: Srh class	Serpentine Receptor, class H [Source:UniProtKB/TrEMBL;Acc:Q9XXN9]	|
WBGene00008407	D2023.3	|	419.725	|			|
WBGene00000883	cyn-7	|	418.901	|		Peptidyl-prolyl cis-trans isomerase 7 [Source:UniProtKB/Swiss-Prot;Acc:P52015]	|
WBGene00001007	dli-1	|	418.628	|	Dynein motors;Dynein motors: light intermediate chain	Dynein Light Intermediate chain [Source:UniProtKB/TrEMBL;Acc:G5ED34]	|
WBGene00044578	K01A12.4	|	418.398	|			|
WBGene00018985	F56F10.2	|	416.935	|			|
WBGene00013308	nuo-3	|	409.329	|		NADH Ubiquinone Oxidoreductase [Source:UniProtKB/TrEMBL;Acc:O18236]	|
WBGene00006727	ubq-1	|	408.662	|		Polyubiquitin-A Ubiquitin Ubiquitin-related [Source:UniProtKB/Swiss-Prot;Acc:P0CG71]	|
WBGene00022336	Y82E9BR.3	|	407.978	|		ATP synthase lipid-binding protein, mitochondrial [Source:UniProtKB/Swiss-Prot;Acc:Q9BKS0]	|
WBGene00022522	ZC132.3	|	406.126	|			|
WBGene00000693	col-119	|	405.298	|		COLlagen [Source:UniProtKB/TrEMBL;Acc:Q18799]	|
WBGene00018187	twf-2	|	403.822	|		TWinFilin actin binding protein homolog [Source:UniProtKB/TrEMBL;Acc:Q20173]	|
WBGene00003759	nlp-21	|	399.418	|	Neuropeptide;Neuropeptide: Neuropeptide-like proteins	Neuropeptide-Like Protein [Source:UniProtKB/TrEMBL;Acc:Q9XX02]	|
WBGene00000973	dhs-9	|	399.383	|		DeHydrogenases, Short chain [Source:UniProtKB/TrEMBL;Acc:Q9N538]	|
WBGene00019968	R08F11.4	|	398.986	|			|
WBGene00269432	ZC132.11	|	397.388	|			|
WBGene00001503	fum-1	|	396.812	|		Probable fumarate hydratase, mitochondrial [Source:UniProtKB/Swiss-Prot;Acc:O17214]	|
WBGene00000829	ctb-1	|	396.457	|		Cytochrome b [Source:UniProtKB/Swiss-Prot;Acc:P24890]	|
WBGene00010506	K02E2.1	|	395.09	|			|
WBGene00008797	F14D7.10	|	394.511	|			|
WBGene00000733	col-160	|	393.689	|		COLlagen [Source:UniProtKB/TrEMBL;Acc:Q20921]	|
WBGene00013463	kdp-1	|	392.94	|		KASH (Klarsicht/ANC-1/Syne Homology) Domain Protein [Source:UniProtKB/TrEMBL;Acc:Q95PZ1]	|
WBGene00009004	pfd-6	|	391.443	|		Probable prefoldin subunit 6 [Source:UniProtKB/Swiss-Prot;Acc:P52554]	|
WBGene00017536	F17A9.4	|	391.377	|			|
WBGene00003885	osm-5	|	391.313	|	Sensory cilia transport;Sensory cilia transport: IFT-B	OSM-5 [Source:UniProtKB/TrEMBL;Acc:G5ED37]	|
WBGene00015168	pdi-6	|	389.966	|		Protein disulfide-isomerase A6 homolog [Source:UniProtKB/Swiss-Prot;Acc:Q11067]	|
WBGene00005380	srh-164	|	387.025	|			|
WBGene00010239	F58B4.6	|	386.5	|			|
WBGene00019831	R02F2.1	|	386.25	|			|
WBGene00015687	chdp-1	|	385.257	|		Calponin Homology Domain containing Protein [Source:UniProtKB/TrEMBL;Acc:P91027]	|
WBGene00011884	enol-1	|	382.903	|		Enolase [Source:UniProtKB/Swiss-Prot;Acc:Q27527]	|
WBGene00006889	pfd-3	|	382.186	|		Probable prefoldin subunit 3 [Source:UniProtKB/Swiss-Prot;Acc:O18054]	|
WBGene00018803	fbxa-24	|	382.122	|		F-box A protein [Source:UniProtKB/TrEMBL;Acc:Q9TZ85]	|
WBGene00006528	tba-1	|	380.35	|		Tubulin alpha chain [Source:UniProtKB/TrEMBL;Acc:O18688]	|
WBGene00008577	F08G2.5	|	378.736	|			|
WBGene00022748	oaz-1	|	378.214	|		Ornithine decarboxylase antizyme [Source:UniProtKB/Swiss-Prot;Acc:Q9NHZ6]	|
WBGene00004498	rps-29	|	377.057	|		Ribosomal Protein, Small subunit [Source:UniProtKB/TrEMBL;Acc:P90983]	|
WBGene00020547	srz-7	|	373.142	|			|
WBGene00015514	nlp-77	|	370.952	|	Neuropeptide;Neuropeptide: Neuropeptide-like proteins	Neuropeptide-Like Protein [Source:UniProtKB/TrEMBL;Acc:Q17698]	|
WBGene00004448	rpl-34	|	370.945	|		Ribosomal Protein, Large subunit [Source:UniProtKB/TrEMBL;Acc:A3QMC5]	|
WBGene00013638	Y105C5A.14	|	370.306	|			|
WBGene00001946	his-72	|	370.24	|		Histone H3.3 type 2 [Source:UniProtKB/Swiss-Prot;Acc:Q9U281]	|
WBGene00003752	nlp-14	|	369	|	Neuropeptide;Neuropeptide: Neuropeptide-like proteins	Neuropeptide-Like Protein [Source:UniProtKB/TrEMBL;Acc:H2KYR6]	|
WBGene00005417	srh-207	|	368.4	|	Chemoreceptor;Chemoreceptor: Srh class	Serpentine Receptor, class H [Source:UniProtKB/TrEMBL;Acc:Q9XTR9]	|
WBGene00004422	rpl-11.1	|	367.061	|		60S ribosomal protein L11-1 [Source:UniProtKB/Swiss-Prot;Acc:Q94300]	|
WBGene00000681	col-107	|	366.208	|		COLlagen [Source:UniProtKB/TrEMBL;Acc:Q86S35]	|
WBGene00000608	col-19	|	365.339	|		Cuticle collagen 19 [Source:UniProtKB/Swiss-Prot;Acc:P18835]	|
WBGene00012813	Y43F8B.2	|	364.707	|			|
WBGene00000594	col-3	|	363.298	|		COLlagen; COLlagen structural [Source:UniProtKB/TrEMBL;Acc:G5EDG6]	|
WBGene00009688	F44E5.1	|	362.978	|			|
WBGene00010574	K04H4.5	|	362.125	|			|
WBGene00005430	srh-220	|	361.047	|	Chemoreceptor;Chemoreceptor: Srh class	Serpentine Receptor, class H [Source:UniProtKB/TrEMBL;Acc:Q20529]	|
WBGene00005264	srh-41	|	360.608	|	Chemoreceptor;Chemoreceptor: Srh class	Serpentine Receptor, class H [Source:UniProtKB/TrEMBL;Acc:Q9XVZ3]	|
WBGene00019967	cyp-33C8	|	360.593	|		CYtochrome P450 family [Source:UniProtKB/TrEMBL;Acc:O02641]	|
WBGene00009880	F49C12.11	|	357.771	|		Translation machinery-associated protein 7 homolog [Source:UniProtKB/Swiss-Prot;Acc:Q20588]	|
WBGene00005363	srh-147	|	356.488	|	Chemoreceptor;Chemoreceptor: Srh class	Serpentine Receptor, class H [Source:UniProtKB/TrEMBL;Acc:Q7YXA8]	|
WBGene00009216	F28D1.6	|	356.226	|			|
WBGene00012471	Y17G7B.20	|	355.37	|			|
WBGene00000653	col-77	|	355.256	|		COLlagen [Source:UniProtKB/TrEMBL;Acc:Q21562]	|
WBGene00007091	eri-12	|	355.201	|		Enhanced RNAI (RNA interference) [Source:UniProtKB/TrEMBL;Acc:Q17415]	|
WBGene00009126	pyk-1	|	354.154	|		Pyruvate kinase [Source:UniProtKB/TrEMBL;Acc:Q7JL40]	|
WBGene00012967	kvs-4	|	352.492	|	Potassium Channel;Potassium Channel: Voltage-gated: Shab/K 6	Probable voltage-gated potassium channel subunit kvs-4 [Source:UniProtKB/Swiss-Prot;Acc:Q9XXD1]	|
WBGene00017295	F09E10.5	|	351.691	|			|
WBGene00021395	pnc-1	|	349.038	|		Pyrazinamidase and NiCotinamidase [Source:UniProtKB/TrEMBL;Acc:A7WK39]	|
WBGene00020390	T10B5.4	|	348.03	|			|
WBGene00010898	nphp-1	|	346.687	|		Nephrocystin-1-like protein [Source:UniProtKB/Swiss-Prot;Acc:O17972]	|
WBGene00023282	F39E9.9	|	346.359	|			|
WBGene00007191	lgc-20	|	344.028	|	nAChR type ligand gated ion channel. Cys-loop LGIC superfamily	Ligand-Gated ion Channel [Source:UniProtKB/TrEMBL;Acc:A0A2K5ATQ0]	|
WBGene00005555	sri-43	|	343.337	|	Chemoreceptor;Chemoreceptor: Sri class	Serpentine Receptor, class I [Source:UniProtKB/TrEMBL;Acc:Q9TZE8]	|
WBGene00011372	npr-26	|	342.72	|	Neuropeptide receptors;Neuropeptide receptors: Somatostatin receptor receptor family	NeuroPeptide Receptor family [Source:UniProtKB/TrEMBL;Acc:A0A0K3AS23]	|
WBGene00002696	let-504	|	340.918	|			|
WBGene00001758	gst-10	|	340.441	|		Glutathione S-transferase P 10 [Source:UniProtKB/Swiss-Prot;Acc:Q9N4X8]	|
WBGene00015935	C17H12.10	|	339.376	|			|
WBGene00004300	ram-2	|	338.213	|			|
WBGene00000667	col-92	|	337.767	|		COLlagen [Source:UniProtKB/TrEMBL;Acc:Q9XVG3]	|
WBGene00019263	H35B03.1	|	336.74	|			|
WBGene00013856	ZC168.2	|	335.457	|			|
WBGene00009534	F38B7.3	|	333.937	|			|
WBGene00012910	Y46G5A.20	|	333.678	|			|
WBGene00000754	col-181	|	332.815	|		COLlagen [Source:UniProtKB/TrEMBL;Acc:Q2XN04]	|
WBGene00001598	glh-1	|	332.808	|		ATP-dependent RNA helicase glh-1 [Source:UniProtKB/Swiss-Prot;Acc:P34689]	|
WBGene00000380	cct-5	|	332.723	|		T-complex protein 1 subunit epsilon [Source:UniProtKB/Swiss-Prot;Acc:P47209]	|
WBGene00004131	pqn-44	|	332.33	|		Prion-like-(Q/N-rich)-domain-bearing protein [Source:UniProtKB/TrEMBL;Acc:Q86NJ5]	|
WBGene00001983	hoe-1	|	332.259	|		Ribonuclease Z [Source:UniProtKB/Swiss-Prot;Acc:O44476]	|
WBGene00006780	unc-44	|	332.188	|		AO49 ankyrin [Source:UniProtKB/TrEMBL;Acc:Q7JP86]	|
WBGene00019643	K11C4.2	|	332.121	|			|
WBGene00000669	col-94	|	331.173	|		COLlagen [Source:UniProtKB/TrEMBL;Acc:Q9U349]	|
WBGene00077698	lurp-4	|	330.916	|	Auxiliary subunit for:: nAChR LGIC	LU (Ly6 Urokinase plasminogen) domain Receptor-related Protein [Source:UniProtKB/TrEMBL;Acc:B2D6N2]	|
WBGene00002083	inf-1	|	330.115	|		Eukaryotic initiation factor 4A [Source:UniProtKB/Swiss-Prot;Acc:P27639]	|
WBGene00000492	che-13	|	329.827	|	Sensory cilia transport;Sensory cilia transport: IFT-B	Intraflagellar transport protein che-13 [Source:UniProtKB/Swiss-Prot;Acc:Q93833]	|
WBGene00004410	rla-2	|	328.853	|		Ribosomal protein, Large subunit, Acidic (P1) [Source:UniProtKB/TrEMBL;Acc:Q9U1X9]	|
WBGene00022042	icd-2	|	328.143	|		Nascent polypeptide-associated complex subunit alpha [Source:UniProtKB/Swiss-Prot;Acc:Q86S66]	|
WBGene00000244	bbs-8	|	327.922	|	Sensory cilia transport;Sensory cilia transport: BBSome	Tetratricopeptide repeat protein 8 [Source:UniProtKB/Swiss-Prot;Acc:Q23049]	|
WBGene00009973	F53C11.3	|	327.434	|		Uncharacterized oxidoreductase F53C11.3 [Source:UniProtKB/Swiss-Prot;Acc:Q93761]	|
WBGene00010959	nduo-1	|	327.054	|			|
WBGene00013556	Y75B8A.23	|	326.006	|			|
WBGene00019607	K10B2.4	|	324.113	|			|
WBGene00004490	rps-21	|	323.95	|		40S ribosomal protein S21 [Source:UniProtKB/Swiss-Prot;Acc:P49197]	|
WBGene00001459	flp-16	|	323.403	|	Neuropeptide;Neuropeptide: FMRFamides (31 flp genes)	FMRFamide-like neuropeptides 16 AQTFVRF-amide 1 AQTFVRF-amide 2 GQTFVRF-amide [Source:UniProtKB/Swiss-Prot;Acc:Q7YX32]	|
WBGene00000715	col-142	|	323.181	|		COLlagen [Source:UniProtKB/TrEMBL;Acc:O17036]	|
WBGene00004497	rps-28	|	321.633	|		40S ribosomal protein S28 [Source:UniProtKB/Swiss-Prot;Acc:Q95Y04]	|
WBGene00008586	snrp-40.1	|	320.111	|		Small Nuclear RibonucleoProtein homolog [Source:UniProtKB/TrEMBL;Acc:Q19211]	|
WBGene00000553	cmk-1	|	320.064	|		Calcium/calmodulin-dependent protein kinase type 1 [Source:UniProtKB/Swiss-Prot;Acc:Q9TXJ0]	|
WBGene00016397	maph-9	|	319.83	|			|
WBGene00001898	his-24	|	319.813	|		Histone H1.1 [Source:UniProtKB/Swiss-Prot;Acc:P10771]	|
WBGene00022389	pde-6	|	319.714	|	Phosphodiesterase (PDE);Phosphodiesterase (PDE): cAMP-specific PDEs	Probable 3',5'-cyclic phosphodiesterase pde-6 [Source:UniProtKB/Swiss-Prot;Acc:Q9N2V9]	|
WBGene00019364	mksr-1	|	319.102	|		MecKel Syndrome 1 (MKS1)-Related [Source:UniProtKB/TrEMBL;Acc:Q21191]	|
WBGene00016173	fust-1	|	318.992	|		FUS/TLS RNA binding protein homolog [Source:UniProtKB/TrEMBL;Acc:Q18265]	|
WBGene00007253	C01H6.3	|	317.74	|			|
WBGene00000732	col-159	|	316.668	|		COLlagen [Source:UniProtKB/TrEMBL;Acc:Q20922]	|
WBGene00003903	pab-2	|	315.72	|		Polyadenylate-binding protein [Source:UniProtKB/TrEMBL;Acc:Q19579]	|
WBGene00001679	gpb-1	|	315.62	|	GPCR signalling;GPCR signalling: Gβ	Guanine nucleotide-binding protein subunit beta-1 [Source:UniProtKB/Swiss-Prot;Acc:P17343]	|
WBGene00009136	lurp-3	|	315.57	|	Auxiliary subunit for:: nAChR LGIC	LU (Ly6 Urokinase plasminogen) domain Receptor-related Protein [Source:UniProtKB/TrEMBL;Acc:P91986]	|
WBGene00005347	srh-130	|	315.477	|	Chemoreceptor;Chemoreceptor: Srh class	Serpentine Receptor, class H [Source:UniProtKB/TrEMBL;Acc:Q9GUC3]	|
WBGene00001172	egl-3	|	315.182	|	Neuropeptide processing;Neuropeptide processing: Maturation	Neuroendocrine convertase 2 [Source:UniProtKB/Swiss-Prot;Acc:G5ECN9]	|
WBGene00005519	sri-7	|	314.092	|	Chemoreceptor;Chemoreceptor: Sri class	Serpentine Receptor, class I [Source:UniProtKB/TrEMBL;Acc:O45759]	|
WBGene00020894	T28D9.1	|	313.134	|			|
WBGene00045392	F26D11.12	|	312.524	|			|
WBGene00010290	F58H1.7	|	311.392	|		NMDA receptor auxiliary protein [Source:UniProtKB/TrEMBL;Acc:G5EEF9]	|
WBGene00000149	apl-1	|	309.589	|		Amyloid-beta-like protein [Source:UniProtKB/Swiss-Prot;Acc:Q10651]	|
WBGene00005375	srh-159	|	309.382	|	Chemoreceptor;Chemoreceptor: Srh class	Serpentine Receptor, class H [Source:UniProtKB/TrEMBL;Acc:Q9U3G2]	|
WBGene00010865	M04D8.7	|	309.015	|			|
WBGene00004453	rpl-39	|	307.832	|		60S ribosomal protein L39 [Source:UniProtKB/Swiss-Prot;Acc:P52814]	|
WBGene00001094	dars-1	|	307.148	|		Aspartate--tRNA ligase, cytoplasmic [Source:UniProtKB/Swiss-Prot;Acc:Q03577]	|
WBGene00007534	fubl-1	|	304.566	|		FUBp (FUBP) Like [Source:UniProtKB/TrEMBL;Acc:Q2XMZ9]	|
WBGene00000740	col-167	|	304.393	|		COLlagen [Source:UniProtKB/TrEMBL;Acc:Q22379]	|
WBGene00009575	F40F8.1	|	303.864	|		UMP-CMP kinase 2 [Source:UniProtKB/Swiss-Prot;Acc:Q20230]	|
WBGene00005663	sars-1	|	301.268	|		Probable serine--tRNA ligase, cytoplasmic [Source:UniProtKB/Swiss-Prot;Acc:Q18678]	|
WBGene00003371	mlc-3	|	299.921	|	Calcium binding protein;Calcium binding protein: Others	Myosin, essential light chain [Source:UniProtKB/Swiss-Prot;Acc:P53014]	|
WBGene00020163	T02G5.3	|	298.068	|			|
WBGene00012016	inpp-1	|	296.143	|		INositol Polyphosphate-5-Phosphatase [Source:UniProtKB/TrEMBL;Acc:G5EBY9]	|
WBGene00016016	C23G10.10	|	292.756	|			|
WBGene00006911	vha-2	|	292.717	|		V-type proton ATPase 16 kDa proteolipid subunit 2 [Source:UniProtKB/Swiss-Prot;Acc:C0HLB3]	|
WBGene00001457	flp-14	|	292.613	|	Neuropeptide;Neuropeptide: FMRFamides (31 flp genes)	FMRFamide-like neuropeptides 14 KHEYLRF-amide 1 KHEYLRF-amide 2 KHEYLRF-amide 3 KHEYLRF-amide 4 [Source:UniProtKB/Swiss-Prot;Acc:Q9XWV7]	|
WBGene00016646	fbxc-5	|	291.984	|		F-box C protein [Source:UniProtKB/TrEMBL;Acc:G5EGJ4]	|
WBGene00006808	unc-76	|	288.875	|			|
WBGene00002059	ife-1	|	286.801	|		Eukaryotic translation initiation factor 4E-1 [Source:UniProtKB/Swiss-Prot;Acc:O45551]	|
WBGene00019492	K07E3.4	|	285.659	|			|
WBGene00045101	C35D6.13	|	284.739	|			|
WBGene00019303	K02D10.3	|	284.648	|			|
WBGene00017653	F21C10.3	|	284.432	|		Hexosyltransferase [Source:UniProtKB/TrEMBL;Acc:H2KY71]	|
WBGene00002264	lec-1	|	284.181	|		32 kDa beta-galactoside-binding lectin [Source:UniProtKB/Swiss-Prot;Acc:P36573]	|
WBGene00001971	hmg-1.1	|	283.403	|		HMG; High mobility group protein 1.1 [Source:UniProtKB/TrEMBL;Acc:G5EFV4]	|
WBGene00021011	W03G1.5	|	282.84	|			|
WBGene00007217	tads-1	|	282.625	|		Temporal Asymmetry between Division of Sister cells [Source:UniProtKB/TrEMBL;Acc:O02209]	|
WBGene00022551	ZC196.8	|	281.853	|			|
WBGene00000881	cyn-5	|	281.339	|		Peptidyl-prolyl cis-trans isomerase 5 [Source:UniProtKB/Swiss-Prot;Acc:P52013]	|
WBGene00005391	srh-175	|	281.015	|			|
WBGene00002045	icd-1	|	278.203	|		Transcription factor BTF3 homolog [Source:UniProtKB/Swiss-Prot;Acc:Q18885]	|
WBGene00000707	col-133	|	278.201	|		COLlagen [Source:UniProtKB/TrEMBL;Acc:Q9XUE9]	|
WBGene00002267	lec-4	|	277.856	|		Galectin [Source:UniProtKB/TrEMBL;Acc:Q18625]	|
WBGene00023423	F43C1.7	|	277.236	|			|
WBGene00044238	C30H6.12	|	277.058	|			|
WBGene00000472	cey-1	|	277.007	|		C. Elegans Y-box [Source:UniProtKB/TrEMBL;Acc:O62213]	|
WBGene00019322	ahcy-1	|	275.916	|		Adenosylhomocysteinase [Source:UniProtKB/Swiss-Prot;Acc:P27604]	|
WBGene00007458	ule-4	|	275.225	|		UPF0375 protein ule-4 [Source:UniProtKB/Swiss-Prot;Acc:O62053]	|
WBGene00011273	R53.4	|	274.928	|		Putative ATP synthase subunit f, mitochondrial [Source:UniProtKB/Swiss-Prot;Acc:Q22021]	|
WBGene00006536	tbb-1	|	274.672	|		Tubulin beta chain [Source:UniProtKB/TrEMBL;Acc:O17921]	|
WBGene00002224	klp-13	|	274.601	|	Kinesin;Kinesin: Family:atypical	Kinesin-like protein [Source:UniProtKB/TrEMBL;Acc:H2KYL6]	|
WBGene00019050	srz-88	|	274.408	|			|
WBGene00004491	rps-22	|	273.709	|		Ribosomal Protein, Small subunit [Source:UniProtKB/TrEMBL;Acc:O17218]	|
WBGene00015810	C16A3.5	|	273.621	|			|
WBGene00020738	T23F2.5	|	272.546	|		UPF0057 membrane protein T23F2.5 [Source:UniProtKB/Swiss-Prot;Acc:Q22702]	|
WBGene00018160	odr-8	|	271.59	|		Ufm1-specific protease [Source:UniProtKB/Swiss-Prot;Acc:Q94218]	|
WBGene00010054	gtf-2E2	|	270.287	|		Transcription initiation factor IIE subunit beta [Source:UniProtKB/TrEMBL;Acc:G5EG47]	|
WBGene00012344	ola-1	|	269.642	|		Obg-like ATPase 1 [Source:UniProtKB/Swiss-Prot;Acc:P91917]	|
WBGene00004405	rop-1	|	269.477	|		60 kDa SS-A/Ro ribonucleoprotein homolog [Source:UniProtKB/Swiss-Prot;Acc:Q27274]	|
WBGene00018825	F54E2.5	|	269.45	|			|
WBGene00016025	xbx-4	|	267.889	|		X-BoX promoter element regulated [Source:UniProtKB/TrEMBL;Acc:O61830]	|
WBGene00008549	din-1	|	265.494	|		Daf-12-interacting protein 1 [Source:UniProtKB/Swiss-Prot;Acc:G5EGK6]	|
WBGene00012540	Y37A1B.7	|	265.445	|			|
WBGene00008794	F14D7.7	|	265.431	|			|
WBGene00006839	unc-115	|	265.129	|			|
WBGene00005373	srh-157	|	265.036	|			|
WBGene00022794	snu-23	|	264.958	|		Putative zinc finger matrin-type protein snu-23 [Source:UniProtKB/Swiss-Prot;Acc:P34670]	|
WBGene00007176	kcnl-1	|	264.168	|	Potassium Channel;Potassium Channel: Calcium-activated SK family	KCNN (Potassium K ChaNNel, calcium activated)-Like [Source:UniProtKB/TrEMBL;Acc:Q8I4D2]	|
WBGene00004916	snr-3	|	263.079	|		Probable small nuclear ribonucleoprotein Sm D1 [Source:UniProtKB/Swiss-Prot;Acc:Q10013]	|
WBGene00005370	srh-154	|	261.939	|	Chemoreceptor;Chemoreceptor: Srh class	Serpentine Receptor, class H [Source:UniProtKB/TrEMBL;Acc:Q9XV76]	|
WBGene00014803	K08G2.14	|	261.762	|			|
WBGene00001853	hil-2	|	261.686	|		Histone H1.2 [Source:UniProtKB/Swiss-Prot;Acc:P15796]	|
WBGene00017082	DC2.5	|	261.218	|			|
WBGene00021232	irld-15	|	260.682	|	Insulin/EGF receptor-like;Insulin/EGF receptor-like: transmembrane or membrane associated	Insulin/EGF-Receptor L Domain protein [Source:UniProtKB/TrEMBL;Acc:Q9N570]	|
WBGene00016463	C35E7.11	|	260.472	|			|
WBGene00014886	Y41E3.5	|	260.346	|			|
WBGene00005413	srh-202	|	259.732	|			|
WBGene00005552	sri-40	|	259.279	|	Chemoreceptor;Chemoreceptor: Sri class	Serpentine Receptor, class I [Source:UniProtKB/TrEMBL;Acc:Q9N549]	|
WBGene00001066	dpy-4	|	258.896	|		DumPY: shorter than wild-type [Source:UniProtKB/TrEMBL;Acc:O62432]	|
WBGene00045190	R01H2.8	|	258.019	|			|
WBGene00006699	uba-1	|	257.369	|		UBA (Human ubiquitin) related [Source:UniProtKB/TrEMBL;Acc:Q27481]	|
WBGene00000256	bli-6	|	257.038	|		BLIstered cuticle [Source:UniProtKB/TrEMBL;Acc:Q8MXR1]	|
WBGene00009454	F36A2.7	|	256.587	|			|
WBGene00017149	EGAP4.1	|	256.241	|			|
WBGene00019579	oac-57	|	255.503	|		O-ACyltransferase homolog [Source:UniProtKB/TrEMBL;Acc:A3QMD2]	|
WBGene00003748	nlp-10	|	254.969	|	Neuropeptide;Neuropeptide: Neuropeptide-like proteins	Neuropeptide-Like Protein [Source:UniProtKB/TrEMBL;Acc:Q20114]	|
WBGene00003836	nxt-1	|	254.789	|		NTF2-related export protein [Source:UniProtKB/Swiss-Prot;Acc:Q9U757]	|
WBGene00021641	Y47G6A.15	|	254.122	|			|
WBGene00004057	pmk-3	|	253.571	|		Mitogen-activated protein kinase pmk-3 [Source:UniProtKB/Swiss-Prot;Acc:O44514]	|
WBGene00018544	nhr-188	|	251.895	|		Nuclear Hormone Receptor family [Source:UniProtKB/TrEMBL;Acc:A0A168H5N7]	|
WBGene00011263	R13H4.5	|	251.564	|			|
WBGene00019269	H41C03.2	|	251.23	|			|
WBGene00000190	arf-1.1	|	251.043	|		ADP-ribosylation factor 1-like 1 [Source:UniProtKB/Swiss-Prot;Acc:Q94231]	|
WBGene00000242	bbs-2	|	250.504	|	Sensory cilia transport;Sensory cilia transport: BBSome	Bardet-Biedl syndrome 2 protein homolog [Source:UniProtKB/Swiss-Prot;Acc:Q19640]	|
WBGene00235291	C01G5.25	|	249.791	|			|
WBGene00007058	dmd-6	|	248.976	|		DM (Doublesex/MAB-3) Domain family [Source:UniProtKB/TrEMBL;Acc:O62159]	|
WBGene00008973	F20D1.1	|	248.436	|			|
WBGene00011966	T23G7.3	|	247.731	|			|
WBGene00016321	tppp-1	|	247.384	|		Tubulin polymerization-promoting protein homolog [Source:UniProtKB/Swiss-Prot;Acc:P91127]	|
WBGene00000191	arl-7	|	245.636	|			|
WBGene00003124	mai-1	|	245.425	|		ATPase inhibitor mai-1, mitochondrial [Source:UniProtKB/Swiss-Prot;Acc:P37209]	|
WBGene00000673	col-98	|	245.293	|		COLlagen [Source:UniProtKB/TrEMBL;Acc:O17805]	|
WBGene00006769	unc-33	|	245.116	|			|
WBGene00002048	ida-1	|	243.724	|	Synaptic release machinery;Synaptic release machinery: IA2	Receptor-type tyrosine-protein phosphatase-like ida-1 [Source:UniProtKB/Swiss-Prot;Acc:G5EGJ5]	|
WBGene00044767	T23B7.3	|	242.386	|			|
WBGene00019896	R05G6.1	|	242.355	|			|
WBGene00005518	sri-6	|	242.31	|	Chemoreceptor;Chemoreceptor: Sri class	Serpentine Receptor, class I [Source:UniProtKB/TrEMBL;Acc:Q22358]	|
WBGene00005964	srx-73	|	240.994	|	Chemoreceptor;Chemoreceptor: Srx class	Serpentine Receptor, class X [Source:UniProtKB/TrEMBL;Acc:Q3Y401]	|
WBGene00000599	col-10	|	240.775	|		Cuticle collagen 10 [Source:UniProtKB/Swiss-Prot;Acc:Q17460]	|
WBGene00006512	abcf-1	|	240.549	|		ABC transporter, class F [Source:UniProtKB/TrEMBL;Acc:Q19554]	|
WBGene00219493	C18D4.12	|	240.517	|			|
WBGene00009660	F43G6.8	|	240.346	|			|
WBGene00022623	ZC487.1	|	240.015	|			|
WBGene00002065	iff-2	|	239.553	|		Eukaryotic translation initiation factor 5A-2 [Source:UniProtKB/Swiss-Prot;Acc:Q20751]	|
WBGene00003695	nhr-105	|	238.935	|		Nuclear Hormone Receptor family [Source:UniProtKB/TrEMBL;Acc:Q3LQX0]	|
WBGene00008671	F11A5.3	|	238.629	|			|
WBGene00007030	epc-1	|	236.83	|		Enhancer of PolyComb-like; Enhancer of polycomb [Source:UniProtKB/TrEMBL;Acc:G5EC14]	|
WBGene00023281	F39E9.8	|	236.83	|			|
WBGene00000906	daf-10	|	236.262	|	Sensory cilia transport;Sensory cilia transport: IFT-A	Intraflagellar transport protein 122 homolog [Source:UniProtKB/Swiss-Prot;Acc:G5EFW7]	|
WBGene00001137	eat-6	|	235.597	|		Sodium/potassium-transporting ATPase subunit alpha [Source:UniProtKB/TrEMBL;Acc:P90735]	|
WBGene00023479	srz-67	|	234.953	|	Chemoreceptor;Chemoreceptor: Srz class	Serpentine Receptor, class Z [Source:UniProtKB/TrEMBL;Acc:Q688C1]	|
WBGene00020231	T05A8.5	|	234.577	|			|
WBGene00021333	Y34D9A.8	|	233.909	|			|
WBGene00000552	cmd-1	|	233.844	|	Calcium binding protein;Calcium binding protein: Calmodulin family	Calmodulin [Source:UniProtKB/Swiss-Prot;Acc:O16305]	|
WBGene00020444	T12B3.1	|	233.733	|			|
WBGene00235283	Y55F3BL.6	|	232.702	|			|
WBGene00003019	lin-33	|	232.409	|			|
WBGene00194731	Y39A1A.27	|	232.378	|			|
WBGene00016977	akap-1	|	231.498	|		KH domain-containing protein akap-1 [Source:UniProtKB/Swiss-Prot;Acc:Q09285]	|
WBGene00077522	T10D4.15	|	231.31	|			|
WBGene00000958	dgk-1	|	230.952	|		Diacylglycerol kinase [Source:UniProtKB/TrEMBL;Acc:Q58AU5]	|
WBGene00017613	F20A1.1	|	230.783	|			|
WBGene00003064	lpd-8	|	230.573	|		LiPid Depleted [Source:UniProtKB/TrEMBL;Acc:Q21915]	|
WBGene00005557	sri-45	|	230.282	|	Chemoreceptor;Chemoreceptor: Sri class	Serpentine Receptor, class I [Source:UniProtKB/TrEMBL;Acc:O16690]	|
WBGene00013821	srz-35	|	229.429	|			|
WBGene00003951	pbs-5	|	229.03	|		Proteasome subunit pbs-5 [Source:UniProtKB/Swiss-Prot;Acc:Q9XUV0]	|
WBGene00002263	lea-1	|	228.974	|		Plant Late Embryo Abundant (LEA) related [Source:UniProtKB/TrEMBL;Acc:G5EGB8]	|
WBGene00017973	ift-81	|	228.715	|	Sensory cilia transport;Sensory cilia transport: IFT-B	IFT (Chlamydomonas IntraFlagellar Transport) homolog [Source:UniProtKB/TrEMBL;Acc:A8DYR7]	|
WBGene00016005	ift-74	|	228.333	|	Sensory cilia transport;Sensory cilia transport: IFT-B	IFT (Chlamydomonas IntraFlagellar Transport) homolog [Source:UniProtKB/TrEMBL;Acc:A0A2C9C2L6]	|
WBGene00013899	ZC443.4	|	227.146	|			|
WBGene00003641	nhr-51	|	226.973	|		Nuclear hormone receptor family member nhr-51 [Source:UniProtKB/Swiss-Prot;Acc:O17927]	|
WBGene00022527	ZC132.9	|	226.509	|			|
WBGene00000981	dhs-18	|	226	|		DeHydrogenases, Short chain [Source:UniProtKB/TrEMBL;Acc:Q18639]	|
WBGene00000140	anc-1	|	225.79	|		Nuclear anchorage protein 1 [Source:UniProtKB/Swiss-Prot;Acc:Q9N4M4]	|
WBGene00011046	R05H10.7	|	225.672	|			|
WBGene00005390	srh-174	|	224.741	|	Chemoreceptor;Chemoreceptor: Srh class	Serpentine Receptor, class H [Source:UniProtKB/TrEMBL;Acc:Q9XV29]	|
WBGene00009050	F22D6.2	|	224.684	|			|
WBGene00015340	C02E7.7	|	223.512	|			|
WBGene00015208	B0495.9	|	223.309	|			|
WBGene00000716	col-143	|	223.055	|		COLlagen [Source:UniProtKB/TrEMBL;Acc:O17038]	|
WBGene00019975	flp-34	|	222.908	|	Neuropeptide;Neuropeptide: FMRFamides (31 flp genes)	FMRF-Like Peptide [Source:UniProtKB/TrEMBL;Acc:A0A0K3AST3]	|
WBGene00018327	F42A6.5	|	222.881	|			|
WBGene00010967	nduo-5	|	222.81	|		NADH-ubiquinone oxidoreductase chain 5 [Source:UniProtKB/Swiss-Prot;Acc:P24896]	|
WBGene00007416	ceh-57	|	222.548	|		C. Elegans Homeobox [Source:UniProtKB/TrEMBL;Acc:Q17788]	|
WBGene00008505	F01G4.6	|	222.194	|		Phosphate carrier protein, mitochondrial [Source:UniProtKB/Swiss-Prot;Acc:P40614]	|
WBGene00011917	T22C1.6	|	221.841	|			|
WBGene00005550	sri-38	|	221.807	|	Chemoreceptor;Chemoreceptor: Sri class	Serpentine Receptor, class I [Source:UniProtKB/TrEMBL;Acc:O16594]	|
WBGene00020114	pde-4	|	221.375	|	Phosphodiesterase (PDE);Phosphodiesterase (PDE): cAMP-specific PDEs	Probable 3',5'-cyclic phosphodiesterase pde-4 [Source:UniProtKB/Swiss-Prot;Acc:Q22000]	|
WBGene00022696	ZK328.7	|	221.007	|	Sensory cilia transport;Sensory cilia transport: IFT-A	Tetratricopeptide repeat protein 21 homolog [Source:UniProtKB/Swiss-Prot;Acc:Q20255]	|
WBGene00003642	nhr-52	|	220.792	|		Nuclear hormone receptor family member nhr-52 [Source:UniProtKB/Swiss-Prot;Acc:O17928]	|
WBGene00220257	C02H6.3	|	220.576	|			|
WBGene00010660	K08D8.6	|	220.311	|			|
WBGene00005281	srh-59	|	220.158	|	Chemoreceptor;Chemoreceptor: Srh class	Serpentine Receptor, class H [Source:UniProtKB/TrEMBL;Acc:O44909]	|
WBGene00010736	istr-1	|	219.353	|		Increased Sodium Tolerance Related [Source:UniProtKB/TrEMBL;Acc:G5EDV6]	|
WBGene00006438	nrfl-1	|	218.62	|		NHERF (Mammalian Na/H Exchange Regulatory Factor) Like [Source:UniProtKB/TrEMBL;Acc:X5LVA5]	|
WBGene00005647	srp-6	|	218.495	|		SeRPin; Serine or cysteine protease inhibitor [Source:UniProtKB/TrEMBL;Acc:G5EFH4]	|
WBGene00000554	cnb-1	|	218.438	|	Calcium binding protein;Calcium binding protein: Others	Protein phosphatase 2B regulatory subunit cnb-1 [Source:UniProtKB/Swiss-Prot;Acc:G5EDN6]	|
WBGene00044771	tmem-218	|	218.026	|		TMEM (Human TransMEMbrane protein) homolog [Source:UniProtKB/TrEMBL;Acc:Q2A955]	|
WBGene00010260	ddx-17	|	217.986	|		DEAD boX helicase homolog [Source:UniProtKB/TrEMBL;Acc:Q9XUW5]	|
WBGene00004888	smo-1	|	217.719	|		Small ubiquitin-related modifier [Source:UniProtKB/Swiss-Prot;Acc:P55853]	|
WBGene00000229	atp-2	|	217.644	|		ATP synthase subunit beta, mitochondrial [Source:UniProtKB/Swiss-Prot;Acc:P46561]	|
WBGene00010074	irld-34	|	216.261	|	Insulin/EGF receptor-like;Insulin/EGF receptor-like: secreted		|
WBGene00021285	Y24D9A.7	|	216.044	|			|
WBGene00008105	C45B11.2	|	215.767	|			|
WBGene00020929	W02C12.2	|	214.71	|			|
WBGene00017493	irld-30	|	213.853	|	Insulin/EGF receptor-like;Insulin/EGF receptor-like: secreted	Insulin/EGF-Receptor L Domain protein [Source:UniProtKB/TrEMBL;Acc:O44600]	|
WBGene00000735	col-162	|	213.84	|		COLlagen [Source:UniProtKB/TrEMBL;Acc:Q9U2P5]	|
WBGene00001749	gst-1	|	213.751	|		Glutathione S-transferase P [Source:UniProtKB/Swiss-Prot;Acc:P10299]	|
WBGene00008820	nlp-55	|	212.939	|	Neuropeptide;Neuropeptide: Neuropeptide-like proteins	Neuropeptide-Like Protein [Source:UniProtKB/TrEMBL;Acc:Q19465]	|
WBGene00011693	T10G3.2	|	211.881	|			|
WBGene00006888	vbh-1	|	211.838	|		Vasa-and Belle-like Helicase [Source:UniProtKB/TrEMBL;Acc:Q65XX1]	|
WBGene00004046	plp-1	|	211.694	|		Pur alpha Like Protein [Source:UniProtKB/TrEMBL;Acc:Q94230]	|
WBGene00014261	shk-1	|	210.943	|	Potassium Channel;Potassium Channel: Voltage-gated: Shaker/K 1 subfamily (1	Potassium voltage-gated channel protein shk-1 [Source:UniProtKB/Swiss-Prot;Acc:Q8I4B0]	|
WBGene00011304	mnk-1	|	210.523	|		MAP kinase-interacting serine/threonine-protein kinase mnk-1 [Source:UniProtKB/Swiss-Prot;Acc:Q8I113]	|
WBGene00009900	F49E12.7	|	210.05	|			|
WBGene00022496	fbxa-92	|	209.959	|		F-box A protein [Source:UniProtKB/TrEMBL;Acc:Q95Y60]	|
WBGene00000717	col-144	|	209.819	|		COLlagen [Source:UniProtKB/TrEMBL;Acc:Q17458]	|
WBGene00018468	F45E4.3	|	209.452	|	PDZ domain protein	CLArinet, functional homolog of cytomatrix at the active zone proteins piccolo and fife [Source:RefSeq peptide;Acc:NP_001294143]	|
WBGene00006527	tax-6	|	209.271	|		Serine/threonine-protein phosphatase 2B catalytic subunit [Source:UniProtKB/Swiss-Prot;Acc:Q0G819]	|
WBGene00000241	bbs-1	|	208.464	|	Sensory cilia transport;Sensory cilia transport: BBSome	Bardet-Biedl syndrome 1 protein homolog [Source:UniProtKB/Swiss-Prot;Acc:Q9NEZ7]	|
WBGene00006960	xbx-1	|	205.883	|	Dynein motors;Dynein motors: light intermediate chain;Sensory cilia transport;Sensory cilia transport: IFT-Dynein	X-BoX promoter element regulated [Source:UniProtKB/TrEMBL;Acc:Q19119]	|
WBGene00005542	sri-30	|	205.744	|	Chemoreceptor;Chemoreceptor: Sri class	Serpentine Receptor, class I [Source:UniProtKB/TrEMBL;Acc:Q95X80]	|
WBGene00011287	glb-24	|	205.226	|	Gas receptors;Gas receptors: Globin	GLoBin related [Source:UniProtKB/TrEMBL;Acc:E1B6T1]	|
WBGene00012764	Y41E3.6	|	205.199	|			|
WBGene00021487	comt-3	|	204.858	|	Neurotransmitter's metabolism;Neurotransmitter's metabolism: Monoamine degradation	Catechol-O-MethylTransferase family [Source:UniProtKB/TrEMBL;Acc:Q965W3]	|
WBGene00008613	fbxb-69	|	204.611	|		F-box B protein [Source:UniProtKB/TrEMBL;Acc:Q9NAQ7]	|
WBGene00005366	srh-150	|	204.297	|			|
WBGene00001074	dpy-13	|	203.994	|		Cuticle collagen dpy-13 [Source:UniProtKB/Swiss-Prot;Acc:P17657]	|
WBGene00020679	ogdh-1	|	203.903	|		2-oxoglutarate dehydrogenase, mitochondrial [Source:UniProtKB/Swiss-Prot;Acc:O61199]	|
WBGene00006753	unc-14	|	203.528	|		UNC-14 [Source:UniProtKB/TrEMBL;Acc:G5ECQ1]	|
WBGene00008288	C54C6.6	|	203.448	|		Cilia- and flagella-associated protein 20 [Source:UniProtKB/Swiss-Prot;Acc:Q86D25]	|
WBGene00005389	srh-173	|	203.226	|	Chemoreceptor;Chemoreceptor: Srh class	Serpentine Receptor, class H [Source:UniProtKB/TrEMBL;Acc:M1ZK04]	|
WBGene00007882	C33A12.3	|	203.021	|			|
WBGene00001129	dyf-13	|	202.902	|	Sensory cilia transport;Sensory cilia transport: IFT-B	Intraflagellar transport protein 56 homolog [Source:UniProtKB/Swiss-Prot;Acc:Q95QT8]	|
WBGene00008126	sre-21	|	201.234	|	Chemoreceptor;Chemoreceptor: Sre class	Serpentine receptor class epsilon-21 [Source:UniProtKB/Swiss-Prot;Acc:O45306]	|
WBGene00021979	Y58A7A.5	|	201.195	|			|
WBGene00000615	col-38	|	200.83	|		COLlagen [Source:UniProtKB/TrEMBL;Acc:Q20754]	|
WBGene00018242	F40G9.6	|	200.803	|			|
WBGene00002980	lgg-1	|	200.552	|			|
WBGene00022027	vps-20	|	199.288	|		Related to yeast Vacuolar Protein Sorting factor [Source:UniProtKB/TrEMBL;Acc:Q9BL60]	|
WBGene00001135	eat-4	|	199.043	|	SLC transporter;SLC transporter: SLC17: Vesicular glutamate transporter family	Probable vesicular glutamate transporter eat-4 [Source:UniProtKB/Swiss-Prot;Acc:P34644]	|
WBGene00003746	nlp-8	|	198.934	|	Neuropeptide;Neuropeptide: Neuropeptide-like proteins	Neuropeptide-Like Protein [Source:UniProtKB/TrEMBL;Acc:Q93409]	|
WBGene00014562	Y17D7B.7	|	198.889	|			|
WBGene00022453	ncap-1	|	197.503	|		NeCAP (NECAP) endocytosis associated protein homolog [Source:UniProtKB/TrEMBL;Acc:Q9N489]	|
WBGene00014159	arrd-4	|	197.356	|	GPCR signalling;GPCR signalling: Arrestins	ARRestin Domain protein [Source:UniProtKB/TrEMBL;Acc:Q23672]	|
WBGene00022139	tub-2	|	197.113	|		TUBby-related [Source:UniProtKB/TrEMBL;Acc:Q9BL53]	|
WBGene00000833	cts-1	|	196.749	|		Probable citrate synthase, mitochondrial [Source:UniProtKB/Swiss-Prot;Acc:P34575]	|
WBGene00017236	nlp-60	|	196.481	|	Neuropeptide;Neuropeptide: Neuropeptide-like proteins	Neuropeptide-Like Protein [Source:UniProtKB/TrEMBL;Acc:Q19195]	|
WBGene00021977	Y58A7A.3	|	195.835	|			|
WBGene00077514	F07B10.7	|	194.924	|			|
WBGene00012193	vps-25	|	194.751	|		Related to yeast Vacuolar Protein Sorting factor [Source:UniProtKB/TrEMBL;Acc:Q9U354]	|
WBGene00000879	cyn-3	|	194.597	|		Peptidyl-prolyl cis-trans isomerase 3 [Source:UniProtKB/Swiss-Prot;Acc:P52011]	|
WBGene00012035	T26C5.5	|	193.596	|			|
WBGene00010822	M01G12.9	|	193.216	|			|
WBGene00044699	nhr-286	|	192.841	|		Nuclear Hormone Receptor family [Source:UniProtKB/TrEMBL;Acc:Q2V068]	|
WBGene00000490	che-11	|	192.641	|	Sensory cilia transport;Sensory cilia transport: IFT-A		|
WBGene00016862	C52A10.1	|	192.488	|		Carboxylic ester hydrolase [Source:UniProtKB/TrEMBL;Acc:Q95YC4]	|
WBGene00001122	dyf-6	|	192.249	|	Sensory cilia transport;Sensory cilia transport: IFT-B	Intraflagellar transport protein 46 homolog [Source:UniProtKB/Swiss-Prot;Acc:Q0G838]	|
WBGene00022884	ZK1248.17	|	191.487	|			|
WBGene00021297	fbxc-55	|	191.339	|		F-box C protein [Source:UniProtKB/TrEMBL;Acc:A3KFC9]	|
WBGene00017445	sid-5	|	190.992	|		Systemic RNA interference defective protein 5 [Source:UniProtKB/Swiss-Prot;Acc:Q19443]	|
WBGene00004699	rsp-2	|	190.546	|		Probable splicing factor, arginine/serine-rich 2 [Source:UniProtKB/Swiss-Prot;Acc:Q23120]	|
WBGene00001117	dyf-1	|	190.367	|	Sensory cilia transport;Sensory cilia transport: IFT-B	Tetratricopeptide repeat protein 30 homolog [Source:UniProtKB/Swiss-Prot;Acc:Q8I7G4]	|
WBGene00006919	vha-10	|	188.735	|		Probable V-type proton ATPase subunit G [Source:UniProtKB/Swiss-Prot;Acc:P91303]	|
WBGene00005393	srh-178	|	187.804	|	Chemoreceptor;Chemoreceptor: Srh class	Serpentine Receptor, class H [Source:UniProtKB/TrEMBL;Acc:G5EBQ4]	|
WBGene00001682	gpc-2	|	187.546	|	GPCR signalling;GPCR signalling: Gγ	G Protein, Gamma subunit; Heterotrimeric G protein gamma subunit 2 [Source:UniProtKB/TrEMBL;Acc:G5ECT6]	|
WBGene00189987	C18H7.12	|	187.4	|			|
WBGene00007646	nkb-1	|	187.316	|		Sodium/potassium-transporting ATPase subunit beta-1 [Source:UniProtKB/Swiss-Prot;Acc:Q93235]	|
WBGene00011737	sqst-1	|	186.687	|		SeQueSTosome related [Source:UniProtKB/TrEMBL;Acc:F1LIM5]	|
WBGene00008672	F11A5.4	|	185.899	|			|
WBGene00013161	Y53F4B.14	|	185.781	|			|
WBGene00022391	prhg-1	|	185.458	|			|
WBGene00001851	hif-1	|	185.309	|		Hypoxia-inducible factor 1 [Source:UniProtKB/Swiss-Prot;Acc:G5EGD2]	|
WBGene00001972	hmg-1.2	|	185.308	|		High mobility group protein 1.2 [Source:UniProtKB/Swiss-Prot;Acc:Q09390]	|
WBGene00009804	F47B8.3	|	185.301	|			|
WBGene00019079	rpa-4	|	185.27	|		Replication Protein A homolog [Source:UniProtKB/TrEMBL;Acc:P91356]	|
WBGene00012450	Y17D7B.2	|	184.351	|			|
WBGene00000175	aqp-7	|	184.284	|		AQuaPorin or aquaglyceroporin related [Source:UniProtKB/TrEMBL;Acc:Q21473]	|
WBGene00022503	ZC13.2	|	183.612	|			|
WBGene00016626	clhm-1	|	183.037	|		Calcium homeostasis modulator protein [Source:UniProtKB/Swiss-Prot;Acc:Q18593]	|
WBGene00005397	srh-182	|	182.865	|	Chemoreceptor;Chemoreceptor: Srh class	Serpentine Receptor, class H [Source:UniProtKB/TrEMBL;Acc:O46006]	|
WBGene00007816	C30F2.2	|	182.634	|			|
WBGene00017605	F19F10.9	|	182.605	|			|
WBGene00003079	lsm-5	|	182.534	|		U6 snRNA-associated Sm-like protein LSm5 [Source:UniProtKB/TrEMBL;Acc:O18694]	|
WBGene00018788	shc-1	|	182.089	|		SHC-transforming protein homolog 1 [Source:UniProtKB/Swiss-Prot;Acc:Q9TYT3]	|
WBGene00003886	osm-6	|	182.048	|	Sensory cilia transport;Sensory cilia transport: IFT-B	Osm-6 protein [Source:UniProtKB/TrEMBL;Acc:G5EDF6]	|
WBGene00015901	nhr-158	|	181.11	|		Nuclear Hormone Receptor family [Source:UniProtKB/TrEMBL;Acc:O16389]	|
WBGene00009826	F47G4.5	|	181.05	|			|
WBGene00020930	hlh-30	|	180.513	|		Helix Loop Helix [Source:UniProtKB/TrEMBL;Acc:Q86MJ3]	|
WBGene00018395	mtch-1	|	180.339	|		MiTochondrial Carrier Homolog [Source:UniProtKB/TrEMBL;Acc:Q8I7N5]	|
WBGene00000475	cey-4	|	179.506	|		C. Elegans Y-box [Source:UniProtKB/TrEMBL;Acc:G5EDV3]	|
WBGene00010700	nipi-3	|	179.376	|			|
WBGene00004897	snb-1	|	179.167	|	Synaptic release machinery;Synaptic release machinery: R-SNARE:VAMP/synaptobrevin	Synaptobrevin-1 [Source:UniProtKB/Swiss-Prot;Acc:O02495]	|
WBGene00000953	del-2	|	178.687	|	DEG/EaNC channel	DEgenerin Like [Source:UniProtKB/TrEMBL;Acc:D3YT21]	|
WBGene00000502	chp-1	|	178.619	|		CHORD Protein; CHORD containing protein [Source:UniProtKB/TrEMBL;Acc:G5EEI8]	|
WBGene00019395	K04F10.2	|	178.429	|			|
WBGene00019023	F58A6.2	|	178.37	|			|
WBGene00000230	atp-3	|	177.996	|		ATP synthase subunit [Source:UniProtKB/TrEMBL;Acc:Q7JNG1]	|
WBGene00303023	K07F5.22	|	177.988	|			|
WBGene00022847	ZK1055.6	|	177.692	|			|
WBGene00015861	C16D9.6	|	177.602	|		Glycoprotein-N-acetylgalactosamine 3-beta-galactosyltransferase 1 [Source:UniProtKB/TrEMBL;Acc:Q22900]	|
WBGene00021915	Y55D5A.1	|	177.601	|			|
WBGene00007681	C18D11.3	|	177.091	|			|
WBGene00000161	apa-2	|	176.9	|		AP-2 complex subunit alpha [Source:UniProtKB/TrEMBL;Acc:Q22601]	|
WBGene00018266	nhr-183	|	176.843	|		Nuclear Hormone Receptor family [Source:UniProtKB/TrEMBL;Acc:O16677]	|
WBGene00019177	H10D18.1	|	176.637	|			|
WBGene00019053	F58F6.5	|	176.41	|			|
WBGene00008480	eif-2A	|	175.265	|		Eukaryotic translation initiation factor 2A [Source:UniProtKB/Swiss-Prot;Acc:Q19052]	|
WBGene00013025	vha-13	|	175.249	|		V-type proton ATPase catalytic subunit A [Source:UniProtKB/Swiss-Prot;Acc:Q9XW92]	|
WBGene00005438	srh-230	|	174.671	|			|
WBGene00016785	C49G7.7	|	174.665	|			|
WBGene00001945	his-71	|	174.646	|		Histone H3.3 type 1 [Source:UniProtKB/Swiss-Prot;Acc:Q10453]	|
WBGene00021690	Y48G8AL.12	|	174.55	|			|
WBGene00010318	F59B10.2	|	174.413	|			|
WBGene00009844	cwp-5	|	174.345	|		Coexpressed With Polycystins [Source:UniProtKB/TrEMBL;Acc:B6VQ87]	|
WBGene00000720	col-147	|	174.261	|		COLlagen [Source:UniProtKB/TrEMBL;Acc:Q22256]	|
WBGene00012440	nlp-53	|	173.895	|	Neuropeptide;Neuropeptide: Neuropeptide-like proteins	Neuropeptide-Like Protein [Source:UniProtKB/TrEMBL;Acc:Q9XXJ3]	|
WBGene00000779	cpn-3	|	173.613	|		CalPoNin [Source:UniProtKB/TrEMBL;Acc:O01542]	|
WBGene00007980	C36E8.1	|	173.569	|			|
WBGene00017988	fipp-1	|	173.452	|		Factor Interacting with Poly(A) Polymerase [Source:UniProtKB/TrEMBL;Acc:O16293]	|
WBGene00015303	rga-6	|	173.436	|		Rho GTPase Activating protein [Source:UniProtKB/TrEMBL;Acc:H2KYD2]	|
WBGene00000728	col-155	|	172.974	|		Putative cuticle collagen 155 [Source:UniProtKB/Swiss-Prot;Acc:Q21184]	|
WBGene00009134	lurp-2	|	172.877	|	Auxiliary subunit for:: nAChR LGIC	LU (Ly6 Urokinase plasminogen) domain Receptor-related Protein [Source:UniProtKB/TrEMBL;Acc:P91987]	|
WBGene00045056	F13H10.9	|	172.828	|			|
WBGene00014195	srz-10	|	172.444	|	Chemoreceptor;Chemoreceptor: Srz class	Serpentine Receptor, class Z [Source:UniProtKB/TrEMBL;Acc:G5EDS7]	|
WBGene00022836	ZK973.11	|	172.38	|			|
WBGene00004368	ric-19	|	172.345	|		Resistance to inhibitors of cholinesterase protein 19 [Source:UniProtKB/Swiss-Prot;Acc:P91124]	|
WBGene00009097	fipr-2	|	172.274	|		FIP (Fungus-Induced Protein) Related [Source:UniProtKB/TrEMBL;Acc:B5U8M6]	|
WBGene00018545	nhr-189	|	172.176	|		Nuclear Hormone Receptor family [Source:UniProtKB/TrEMBL;Acc:O01563]	|
WBGene00007892	C33B4.4	|	172.161	|			|
WBGene00011935	scrm-1	|	172.104	|		Phospholipid scramblase [Source:UniProtKB/TrEMBL;Acc:Q7JKP1]	|
WBGene00003964	pdi-3	|	171.929	|			|
WBGene00014091	ZK822.4	|	171.793	|			|
WBGene00022842	ZK994.6	|	171.56	|			|
WBGene00043064	nbet-1	|	171.102	|	Synaptic release machinery;Synaptic release machinery: Q_SNARE:Qc subtype	BET1; Nematode homolog of yeast BET1 (Blocked Early in Transport) [Source:UniProtKB/TrEMBL;Acc:G5EEU1]	|
WBGene00001229	eif-3.F	|	169.666	|		Eukaryotic translation initiation factor 3 subunit F [Source:UniProtKB/Swiss-Prot;Acc:Q18967]	|
WBGene00010639	K07F5.15	|	169.12	|			|
WBGene00017156	F01E11.3	|	168.535	|			|
WBGene00022170	cox-6B	|	168.513	|		Cytochrome OXidase assembly protein [Source:UniProtKB/TrEMBL;Acc:Q9BL34]	|
WBGene00003947	pbs-1	|	167.927	|		Proteasome subunit beta [Source:UniProtKB/TrEMBL;Acc:Q966I8]	|
WBGene00016744	bbs-9	|	167.579	|	Sensory cilia transport;Sensory cilia transport: BBSome		|
WBGene00012605	Y38F1A.1	|	167.31	|			|
WBGene00019770	M04F3.4	|	167.26	|	Calcium binding protein;Calcium binding protein: Others		|
WBGene00020808	clik-1	|	167.236	|		CaLponIn-liKe proteins [Source:UniProtKB/TrEMBL;Acc:H2L0M6]	|
WBGene00021807	Y53G8AM.7	|	167.051	|			|
WBGene00020447	mob-3	|	166.923	|		Mps One Binder (Mats/MOB1) homolog [Source:UniProtKB/TrEMBL;Acc:W6RY92]	|
WBGene00009940	strl-1	|	166.012	|		Steroidogenic acute regulatory-like protein 1 [Source:UniProtKB/Swiss-Prot;Acc:O17883]	|
WBGene00011892	erh-1	|	165.99	|		Enhancer of rudimentary homolog [Source:UniProtKB/Swiss-Prot;Acc:Q22640]	|
WBGene00004265	qui-1	|	165.764	|		QUInine non-avoider [Source:UniProtKB/TrEMBL;Acc:N1NTL8]	|
WBGene00009274	F30F8.5	|	165.711	|			|
WBGene00000920	daf-28	|	165.459	|	Neuropeptide;Neuropeptide: Insulin-related peptides		|
WBGene00003926	pas-5	|	165.395	|		Proteasome subunit alpha type-5 [Source:UniProtKB/Swiss-Prot;Acc:Q95008]	|
WBGene00019983	sti-1	|	164.842	|		Stress-induced-phosphoprotein 1 [Source:UniProtKB/Swiss-Prot;Acc:O16259]	|
WBGene00020100	mks-1	|	164.631	|		MecKel-Gruber Syndrome (MKS) homolog [Source:UniProtKB/TrEMBL;Acc:O17269]	|
WBGene00000197	aars-2	|	164.575	|		Alanine--tRNA ligase, cytoplasmic [Source:UniProtKB/Swiss-Prot;Acc:O01541]	|
WBGene00009258	ccdc-149	|	164.471	|		Coiled-coil domain-containing protein 149 [Source:UniProtKB/Swiss-Prot;Acc:Q93635]	|
WBGene00043992	bbs-4	|	164.275	|	Sensory cilia transport;Sensory cilia transport: BBSome	Bardet-Biedl syndrome 4 protein homolog [Source:UniProtKB/Swiss-Prot;Acc:Q5CZ52]	|
WBGene00002235	kqt-3	|	164.256	|	Potassium Channel;Potassium Channel: KQT family	Potassium channel, KvQLT family [Source:UniProtKB/TrEMBL;Acc:B7FAS2]	|
WBGene00005386	srh-170	|	163.386	|	Chemoreceptor;Chemoreceptor: Srh class	Serpentine Receptor, class H [Source:UniProtKB/TrEMBL;Acc:O17986]	|
WBGene00015427	C04E6.13	|	163.257	|			|
WBGene00013859	ZC247.1	|	162.252	|			|
WBGene00008745	F13E6.1	|	162.178	|			|
WBGene00012372	W09H1.1	|	161.956	|			|
WBGene00003150	mbk-2	|	161.804	|		Dual specificity tyrosine-phosphorylation-regulated kinase mbk-2 [Source:UniProtKB/Swiss-Prot;Acc:Q9XTF3]	|
WBGene00045514	ZK1037.12	|	160.07	|			|
WBGene00010326	F59C6.5	|	159.974	|			|
WBGene00011678	T10B9.9	|	159.648	|	Neuropeptide;Neuropeptide: Neuropeptide-like proteins		|
WBGene00014233	ZK1128.7	|	159.102	|			|
WBGene00000221	atf-5	|	158.919	|		ATF (cAMP-dependent transcription factor) family [Source:UniProtKB/TrEMBL;Acc:Q22156]	|
WBGene00013642	daf-38	|	158.895	|	Neuropeptide receptors;Neuropeptide receptors: Gonadotropin-releasing hormone receptor family	G-protein coupled receptor daf-38 [Source:UniProtKB/Swiss-Prot;Acc:Q9U320]	|
WBGene00018145	F37C4.5	|	158.664	|			|
WBGene00011155	rbm-3.1	|	158.303	|		RNA Binding Motif protein homolog [Source:UniProtKB/TrEMBL;Acc:O45712]	|
WBGene00000748	col-175	|	158.284	|		COLlagen [Source:UniProtKB/TrEMBL;Acc:Q18480]	|
WBGene00005328	srh-109	|	157.924	|	Chemoreceptor;Chemoreceptor: Srh class	Serpentine Receptor, class H [Source:UniProtKB/TrEMBL;Acc:O45795]	|
WBGene00020397	pcbd-1	|	157.886	|	Neurotransmitter's metabolism;Neurotransmitter's metabolism: Biogenic amine synthesis	Putative pterin-4-alpha-carbinolamine dehydratase [Source:UniProtKB/Swiss-Prot;Acc:Q9TZH6]	|
WBGene00012643	Y39A1A.3	|	157.808	|			|
WBGene00006539	tbb-6	|	157.632	|		Tubulin beta chain [Source:UniProtKB/TrEMBL;Acc:G5EF01]	|
WBGene00023382	Y57E12AL.3	|	157.18	|			|
WBGene00023239	C18C4.4	|	157.075	|			|
WBGene00003954	pcm-1	|	157.004	|		Protein-L-isoaspartate O-methyltransferase [Source:UniProtKB/Swiss-Prot;Acc:Q27873]	|
WBGene00020710	T23B3.2	|	156.9	|			|
WBGene00005371	srh-155	|	156.806	|			|
WBGene00003892	osm-12	|	156.703	|	Sensory cilia transport;Sensory cilia transport: BBSome	Bardet-Biedl syndrome 7 protein homolog [Source:UniProtKB/Swiss-Prot;Acc:Q9XW70]	|
WBGene00019061	F58F12.1	|	156.576	|		ATP synthase subunit delta, mitochondrial [Source:UniProtKB/Swiss-Prot;Acc:Q09544]	|
WBGene00011250	R11H6.2	|	156.523	|			|
WBGene00008930	F18A11.3	|	156.347	|		UPF0729 protein F18A11.3 [Source:UniProtKB/Swiss-Prot;Acc:O01323]	|
WBGene00005531	sri-19	|	156.121	|	Chemoreceptor;Chemoreceptor: Sri class	Serpentine Receptor, class I [Source:UniProtKB/TrEMBL;Acc:J7S134]	|
WBGene00044353	ZK418.10	|	156.037	|			|
WBGene00019679	spcs-3	|	155.909	|		Probable signal peptidase complex subunit 3 [Source:UniProtKB/Swiss-Prot;Acc:P34525]	|
WBGene00010527	srz-74	|	155.769	|	Chemoreceptor;Chemoreceptor: Srz class	Serpentine Receptor, class Z [Source:UniProtKB/TrEMBL;Acc:O45639]	|
WBGene00001763	gst-15	|	155.73	|		Glutathione S-Transferase [Source:UniProtKB/TrEMBL;Acc:Q93697]	|
WBGene00016496	C37C3.2	|	155.717	|		Eukaryotic translation initiation factor 5 [Source:UniProtKB/Swiss-Prot;Acc:Q22918]	|
WBGene00002140	inx-18	|	155.659	|	Gap-junction;Gap-junction: Neuronally expressed	Innexin [Source:UniProtKB/TrEMBL;Acc:Q8MXG8]	|
WBGene00003883	osm-1	|	155.416	|	Sensory cilia transport;Sensory cilia transport: IFT-B	Intraflagellar transport protein osm-1 [Source:UniProtKB/Swiss-Prot;Acc:Q22830]	|
WBGene00044701	AH9.6	|	155.194	|			|
WBGene00009772	ztf-7	|	154.932	|		Zinc finger putative Transcription Factor family [Source:UniProtKB/TrEMBL;Acc:Q20448]	|
WBGene00000984	dhs-21	|	154.793	|		L-xylulose reductase [Source:UniProtKB/Swiss-Prot;Acc:Q21929]	|
WBGene00004189	pars-1	|	154.391	|		Prolyl Amino-acyl tRNA Synthetase [Source:UniProtKB/TrEMBL;Acc:Q65ZK5]	|
WBGene00020581	T19D12.6	|	154.278	|			|
WBGene00016511	C37H5.13	|	154.273	|			|
WBGene00005187	srg-30	|	154.256	|	Chemoreceptor;Chemoreceptor: Srg class	Serpentine receptor class gamma-30 [Source:UniProtKB/Swiss-Prot;Acc:O45150]	|
WBGene00009764	srz-17	|	154.071	|			|
WBGene00000734	col-161	|	154.027	|		COLlagen [Source:UniProtKB/TrEMBL;Acc:O17686]	|
WBGene00018764	F53F10.2	|	153.992	|			|
WBGene00005428	srh-218	|	153.672	|	Chemoreceptor;Chemoreceptor: Srh class	Serpentine Receptor, class H [Source:UniProtKB/TrEMBL;Acc:Q7YTT3]	|
WBGene00007385	atp-5	|	153.582	|		ATP synthase subunit [Source:UniProtKB/TrEMBL;Acc:Q17763]	|
WBGene00016250	hsp-110	|	153.572	|		Heat shock protein 110 [Source:UniProtKB/Swiss-Prot;Acc:Q05036]	|
WBGene00044068	syd-9	|	153.543	|			|
WBGene00013907	sre-20	|	153.126	|	Chemoreceptor;Chemoreceptor: Sre class	Serpentine Receptor, class E (Epsilon) [Source:UniProtKB/TrEMBL;Acc:G3MU24]	|
WBGene00001692	grd-3	|	153.084	|		GRounDhog (Hedgehog-like family) [Source:UniProtKB/TrEMBL;Acc:Q9TYW7]	|
WBGene00077491	K08H10.10	|	153.018	|			|
WBGene00001118	dyf-2	|	152.96	|	Sensory cilia transport;Sensory cilia transport: IFT-A	WD repeat-containing protein dyf-2 [Source:UniProtKB/Swiss-Prot;Acc:G5ECZ4]	|
WBGene00003922	pas-1	|	152.616	|		Proteasome subunit alpha type-6 [Source:UniProtKB/Swiss-Prot;Acc:O17586]	|
WBGene00011261	nphp-4	|	152.542	|		NePHronoPhthisis (Human kidney disease) homolog; Nephrocystin-4-like protein [Source:UniProtKB/TrEMBL;Acc:G5ECP0]	|
WBGene00017900	F28E10.1	|	152.44	|			|
WBGene00003839	ocr-2	|	152.352	|	TRP channel;TRP channel: TRPV	Osm-9 and Capsaicin receptor-Related [Source:UniProtKB/TrEMBL;Acc:O61220]	|
WBGene00006924	vig-1	|	152.168	|		VIG (Drosophila Vasa Intronic Gene) ortholog [Source:UniProtKB/TrEMBL;Acc:H2KYR1]	|
WBGene00004700	rsp-3	|	152.124	|		Probable splicing factor, arginine/serine-rich 3 [Source:UniProtKB/Swiss-Prot;Acc:Q9NEW6]	|
WBGene00009919	kbrl-1	|	151.434	|		NF-kappa-B inhibitor-interacting Ras-like protein [Source:UniProtKB/Swiss-Prot;Acc:Q19143]	|
WBGene00012155	VW02B12L.2	|	151.388	|			|
WBGene00004136	pqn-51	|	151.198	|		Prion-like-(Q/N-rich)-domain-bearing protein [Source:UniProtKB/TrEMBL;Acc:O44625]	|
WBGene00019900	vdac-1	|	151.128	|		Probable voltage-dependent anion-selective channel [Source:UniProtKB/Swiss-Prot;Acc:Q21752]	|
WBGene00001030	dnj-12	|	151.081	|		DNaJ domain (Prokaryotic heat shock protein) [Source:UniProtKB/TrEMBL;Acc:O45502]	|
WBGene00017730	F22H10.6	|	151.016	|			|
WBGene00008384	D1081.6	|	150.717	|			|
WBGene00019399	K04F10.7	|	150.607	|			|
WBGene00006669	twk-14	|	150.122	|	Potassium Channel;Potassium Channel: TWK Channel family	TWiK family of potassium channels [Source:UniProtKB/TrEMBL;Acc:Q21094]	|
WBGene00002064	iff-1	|	149.987	|		Eukaryotic translation initiation factor 5A-1 [Source:UniProtKB/Swiss-Prot;Acc:P34563]	|
WBGene00013623	fbxa-90	|	149.711	|		F-box A protein [Source:UniProtKB/TrEMBL;Acc:Q9XX86]	|
WBGene00022570	sdz-35	|	149.425	|		SKN-1 Dependent Zygotic transcript [Source:UniProtKB/TrEMBL;Acc:P91555]	|
WBGene00001374	exp-2	|	149.421	|	Potassium Channel;Potassium Channel: Voltage-gated: Shab/K 2		|
WBGene00008390	D1086.3	|	149.406	|			|
WBGene00020297	nog-1	|	149.263	|		Nucleolar GTP-binding protein 1 [Source:UniProtKB/Swiss-Prot;Acc:O44411]	|
WBGene00021921	rbm-39	|	149.254	|		RNA Binding Motif protein homolog [Source:UniProtKB/TrEMBL;Acc:Q8MXS6]	|
WBGene00005543	sri-31	|	149.2	|	Chemoreceptor;Chemoreceptor: Sri class	Serpentine Receptor, class I [Source:UniProtKB/TrEMBL;Acc:O17172]	|
WBGene00016531	pcyt-2.2	|	149.194	|		Phosphocholine CYtidylylTransferase [Source:UniProtKB/TrEMBL;Acc:A4UVJ6]	|
WBGene00014745	F26D2.8	|	148.931	|			|
WBGene00000064	act-2	|	148.904	|		Actin-2 [Source:UniProtKB/Swiss-Prot;Acc:P10984]	|
WBGene00015328	C02B10.3	|	148.802	|		EGF-like domain-containing protein C02B10.3 [Source:UniProtKB/Swiss-Prot;Acc:O44443]	|
WBGene00044476	F56D6.14	|	148.703	|			|
WBGene00005643	srp-2	|	148.553	|		SeRPin [Source:UniProtKB/TrEMBL;Acc:O17365]	|
WBGene00023474	srz-37	|	148.486	|	Chemoreceptor;Chemoreceptor: Srz class	Serpentine Receptor, class Z [Source:UniProtKB/TrEMBL;Acc:Q688B8]	|
WBGene00001145	eat-16	|	148.392	|	GPCR signalling;GPCR signalling: RGS family		|
WBGene00020442	gen-1	|	148.316	|		GEN1 Holliday junction resolvase homolog [Source:UniProtKB/TrEMBL;Acc:Q22418]	|
WBGene00014122	ZK863.1	|	148.238	|	Neuropeptide receptors;Neuropeptide receptors: Related family with no specific orthologs 2		|
WBGene00001303	emo-1	|	148.203	|		Protein transport protein Sec61 subunit gamma [Source:UniProtKB/Swiss-Prot;Acc:Q19967]	|
WBGene00001648	goa-1	|	148.037	|	GPCR signalling;GPCR signalling: Gα	Guanine nucleotide-binding protein G(o) subunit alpha [Source:UniProtKB/Swiss-Prot;Acc:P51875]	|
WBGene00004278	rab-19	|	147.656	|		RAB family [Source:UniProtKB/TrEMBL;Acc:Q9U1W9]	|
WBGene00016121	ift-43	|	147.446	|		Intraflagellar transport protein 43 homolog [Source:UniProtKB/Swiss-Prot;Acc:Q9BIA4]	|
WBGene00019001	ipgm-1	|	147.432	|		2,3-bisphosphoglycerate-independent phosphoglycerate mutase [Source:UniProtKB/Swiss-Prot;Acc:G5EFZ1]	|
WBGene00004364	ric-4	|	147.228	|	Synaptic release machinery;Synaptic release machinery: Q-SNARE:Qb/c subtype	Synaptosomal-associated protein [Source:UniProtKB/TrEMBL;Acc:A5PEW5]	|
WBGene00008039	C40H1.3	|	147.133	|			|
WBGene00005376	srh-160	|	147.098	|			|
WBGene00005329	srh-110	|	146.668	|			|
WBGene00004800	sir-2.1	|	146.64	|		NAD-dependent protein deacetylase sir-2.1 [Source:UniProtKB/Swiss-Prot;Acc:Q21921]	|
WBGene00011453	ugt-56	|	146.639	|		Putative UDP-glucuronosyltransferase ugt-56 [Source:UniProtKB/Swiss-Prot;Acc:Q22181]	|
WBGene00004698	rsp-1	|	146.39	|		Probable splicing factor, arginine/serine-rich 1 [Source:UniProtKB/Swiss-Prot;Acc:Q23121]	|
WBGene00008852	ubql-1	|	146.348	|		Ubiquilin [Source:UniProtKB/Swiss-Prot;Acc:G5EFF7]	|
WBGene00022382	Y94H6A.10	|	145.912	|			|
WBGene00012717	Y39E4B.6	|	145.901	|			|
WBGene00006923	vhp-1	|	145.397	|		Tyrosine-protein phosphatase vhp-1 [Source:UniProtKB/Swiss-Prot;Acc:Q10038]	|
WBGene00002007	hsp-3	|	145.068	|		Heat shock 70 kDa protein C [Source:UniProtKB/Swiss-Prot;Acc:P27420]	|
WBGene00012607	Y38F1A.4	|	145.02	|			|
WBGene00009323	best-13	|	145.017	|	Chloride channel;Chloride channel: bestrophin-related	Bestrophin homolog 13 [Source:UniProtKB/Swiss-Prot;Acc:O45435]	|
WBGene00021461	nekl-1	|	144.982	|		NEK (NEver in mitosis Kinase) Like [Source:UniProtKB/TrEMBL;Acc:A0A061AD48]	|
WBGene00010037	F54C8.4	|	144.927	|		Probable tyrosine-protein phosphatase F54C8.4 [Source:UniProtKB/Swiss-Prot;Acc:P34442]	|
WBGene00012097	abcf-2	|	144.7	|		ABC transporter, class F [Source:UniProtKB/TrEMBL;Acc:G5EFG4]	|
WBGene00001452	flp-9	|	144.669	|	Neuropeptide;Neuropeptide: FMRFamides (31 flp genes)	FMRFamide-like neuropeptides 9 KPSFVRF-amide 1 KPSFVRF-amide 2 [Source:UniProtKB/Swiss-Prot;Acc:Q18502]	|
WBGene00018917	irld-35	|	144.578	|	Insulin/EGF receptor-like;Insulin/EGF receptor-like: secreted	Insulin/EGF-Receptor L Domain protein [Source:UniProtKB/TrEMBL;Acc:A0A0M7REC9]	|
WBGene00002008	hsp-4	|	144.428	|		Endoplasmic reticulum chaperone BiP homolog [Source:UniProtKB/Swiss-Prot;Acc:P20163]	|
WBGene00018509	xrep-4	|	144.389	|			|
WBGene00003653	nhr-63	|	144.205	|		Nuclear Hormone Receptor family [Source:UniProtKB/TrEMBL;Acc:O62034]	|
WBGene00020696	pygl-1	|	144.05	|		Alpha-1,4 glucan phosphorylase [Source:UniProtKB/TrEMBL;Acc:Q9N5U1]	|
WBGene00003148	mbf-1	|	144.043	|		MBF (Multiprotein bridging factor) transcriptional coactivator [Source:UniProtKB/TrEMBL;Acc:Q9XTV4]	|
WBGene00010833	M03B6.1	|	143.666	|			|
WBGene00010800	srsx-37	|	143.397	|	Chemoreceptor;Chemoreceptor: Srsx class	Serpentine Receptor, class SX [Source:UniProtKB/TrEMBL;Acc:O17961]	|
WBGene00016395	spcs-1	|	142.853	|		Probable signal peptidase complex subunit 1 [Source:UniProtKB/Swiss-Prot;Acc:O44953]	|
WBGene00001496	frm-10	|	142.411	|		FERM domain (Protein4.1-ezrin-radixin-moesin) family [Source:UniProtKB/TrEMBL;Acc:O02254]	|
WBGene00000266	bre-1	|	142.4	|		GDP-mannose 4,6 dehydratase 1 [Source:UniProtKB/Swiss-Prot;Acc:Q18801]	|
WBGene00009570	srz-65	|	142.368	|			|
WBGene00001939	his-65	|	142.166	|		Histone H2A [Source:UniProtKB/Swiss-Prot;Acc:P09588]	|
WBGene00001817	haf-7	|	141.883	|		HAlF transporter (PGP related) [Source:UniProtKB/TrEMBL;Acc:Q9U275]	|
WBGene00016827	sre-53	|	141.769	|	Chemoreceptor;Chemoreceptor: Sre class	Serpentine Receptor, class E (Epsilon) [Source:UniProtKB/TrEMBL;Acc:A3QMA1]	|
WBGene00011246	R11D1.7	|	141.66	|			|
WBGene00016931	C54G6.2	|	141.59	|			|
WBGene00020062	nhr-270	|	141.482	|		Nuclear Hormone Receptor family [Source:UniProtKB/TrEMBL;Acc:O17013]	|
WBGene00006709	ubc-14	|	141.459	|		UBiquitin Conjugating enzyme [Source:UniProtKB/TrEMBL;Acc:Q9U1Q1]	|
WBGene00012289	W05H12.1	|	141.378	|			|
WBGene00007053	chd-7	|	141.134	|		Chromodomain and Helicase Domain protein [Source:UniProtKB/TrEMBL;Acc:O61845]	|
WBGene00017060	D2063.1	|	141.098	|			|
WBGene00021467	Y39G10AR.9	|	141.036	|			|
WBGene00014241	ZK1251.3	|	140.903	|			|
WBGene00010966	nduo-3	|	140.769	|		NADH-ubiquinone oxidoreductase chain 3 [Source:UniProtKB/Swiss-Prot;Acc:P24895]	|
WBGene00007953	hda-11	|	140.571	|		Histone DeAcetylase [Source:UniProtKB/TrEMBL;Acc:Q18477]	|
WBGene00005540	sri-28	|	140.545	|	Chemoreceptor;Chemoreceptor: Sri class	Serpentine Receptor, class I [Source:UniProtKB/TrEMBL;Acc:O17171]	|
WBGene00022599	daf-41	|	140.187	|		Co-chaperone protein daf-41 [Source:UniProtKB/Swiss-Prot;Acc:Q23280]	|
WBGene00007574	C14B1.3	|	139.906	|			|
WBGene00001808	gut-2	|	139.711	|		U6 snRNA-associated Sm-like protein LSm2 [Source:UniProtKB/TrEMBL;Acc:E1B6V1]	|
WBGene00009724	F45D3.4	|	139.693	|			|
WBGene00016658	C45B2.1	|	139.675	|			|
WBGene00077595	K06B4.16	|	139.614	|			|
WBGene00010963	nduo-4	|	139.581	|		NADH-ubiquinone oxidoreductase chain 4 [Source:UniProtKB/Swiss-Prot;Acc:P24892]	|
WBGene00009208	F28C6.9	|	139.32	|			|
WBGene00016790	C49H3.3	|	139.307	|			|
WBGene00001208	egl-44	|	139.112	|		Transcription enhancer factor-like protein egl-44 [Source:UniProtKB/Swiss-Prot;Acc:Q19849]	|
WBGene00002783	let-607	|	139.077	|			|
WBGene00018772	F53G12.4	|	138.924	|			|
WBGene00012026	srz-100	|	138.88	|	Chemoreceptor;Chemoreceptor: Srz class	Serpentine Receptor, class Z [Source:UniProtKB/TrEMBL;Acc:O45825]	|
WBGene00003802	npp-16	|	138.84	|		Nuclear Pore complex Protein [Source:UniProtKB/TrEMBL;Acc:Q7K6X4]	|
WBGene00000616	col-39	|	138.391	|		Cuticle collagen 39 [Source:UniProtKB/Swiss-Prot;Acc:Q09455]	|
WBGene00020275	atp-4	|	138.365	|		ATP synthase subunit [Source:UniProtKB/TrEMBL;Acc:O16517]	|
WBGene00006703	ubc-6	|	138.323	|		UBiquitin Conjugating enzyme [Source:UniProtKB/TrEMBL;Acc:B1Q233]	|
WBGene00006910	vha-1	|	138.308	|		V-type proton ATPase 16 kDa proteolipid subunit 1 [Source:UniProtKB/Swiss-Prot;Acc:Q21898]	|
WBGene00012333	sre-43	|	138.26	|	Chemoreceptor;Chemoreceptor: Sre class	Serpentine Receptor, class E (Epsilon) [Source:UniProtKB/TrEMBL;Acc:Q9XUJ9]	|
WBGene00022668	ZK154.6	|	138.025	|			|
WBGene00018727	jbts-14	|	137.889	|		Transmembrane protein 237 homolog [Source:UniProtKB/Swiss-Prot;Acc:Q20687]	|
WBGene00010742	K10D6.2	|	137.857	|			|
WBGene00010730	ensa-1	|	137.754	|		ENdoSulfine Alpha [Source:UniProtKB/TrEMBL;Acc:Q9XU56]	|
WBGene00014033	arrd-15	|	137.591	|	GPCR signalling;GPCR signalling: Arrestins	Arrestin domain-containing protein 15 [Source:UniProtKB/Swiss-Prot;Acc:P30647]	|
WBGene00007506	C10C5.2	|	137.538	|			|
WBGene00004466	rpn-10	|	137.526	|		26S proteasome non-ATPase regulatory subunit 4 [Source:UniProtKB/Swiss-Prot;Acc:O61742]	|
WBGene00000484	che-2	|	136.924	|	Sensory cilia transport;Sensory cilia transport: IFT-B	CHE-2 protein [Source:UniProtKB/TrEMBL;Acc:G5EGF0]	|
WBGene00000164	apm-3	|	136.758	|		AdaPtin, Mu/medium chain (Clathrin associated complex) [Source:UniProtKB/TrEMBL;Acc:Q20736]	|
WBGene00006833	unc-108	|	136.699	|			|
WBGene00017353	F10E9.1	|	136.453	|			|
WBGene00006201	str-155	|	136.442	|		Seven TM Receptor [Source:UniProtKB/TrEMBL;Acc:Q9N2T5]	|
WBGene00020363	fbxa-3	|	136.136	|		F-box A protein [Source:UniProtKB/TrEMBL;Acc:O76638]	|
WBGene00001427	fkb-2	|	136.036	|		Peptidylprolyl isomerase [Source:UniProtKB/TrEMBL;Acc:Q9U2Q8]	|
WBGene00022410	Y97E10C.1	|	135.764	|			|
WBGene00022569	ZC239.6	|	135.535	|			|
WBGene00019825	R02D3.8	|	134.921	|			|
WBGene00012028	srz-99	|	134.909	|	Chemoreceptor;Chemoreceptor: Srz class	Serpentine Receptor, class Z [Source:UniProtKB/TrEMBL;Acc:Q86D02]	|
WBGene00004739	scd-1	|	134.9	|		Suppressor of Constitutive Dauer formation [Source:UniProtKB/TrEMBL;Acc:Q9XXK5]	|
WBGene00001008	dlk-1	|	134.811	|		Mitogen-activated protein kinase kinase kinase dlk-1 [Source:UniProtKB/Swiss-Prot;Acc:O01700]	|
WBGene00016115	mdt-26	|	134.737	|		MeDiaTor [Source:UniProtKB/TrEMBL;Acc:H2KYV0]	|
WBGene00015099	ggtb-1	|	134.731	|		Probable geranylgeranyl transferase type-2 subunit beta [Source:UniProtKB/Swiss-Prot;Acc:P41992]	|
WBGene00012089	T27E7.4	|	134.094	|			|
WBGene00001954	hlh-10	|	133.839	|		Helix Loop Helix [Source:UniProtKB/TrEMBL;Acc:Q23579]	|
WBGene00009584	drap-1	|	133.81	|		DRAP1 corepressor homolog [Source:UniProtKB/TrEMBL;Acc:Q86G95]	|
WBGene00000063	act-1	|	133.649	|		Actin-1 [Source:UniProtKB/Swiss-Prot;Acc:P0DM41]	|
WBGene00004316	rbf-1	|	133.607	|	Synaptic release machinery;Synaptic release machinery: rabphilin	Rabphilin-1 [Source:UniProtKB/Swiss-Prot;Acc:P41885]	|
WBGene00004215	ptp-3	|	133.503	|	Extracellular Immunoglobulin;Extracellular Immunoglobulin: Ig domain proteins	Tyrosine-protein phosphatase Lar-like [Source:UniProtKB/Swiss-Prot;Acc:Q9BMN8]	|
WBGene00014259	ZK1320.11	|	133.306	|			|
WBGene00020033	R12E2.7	|	133.222	|			|
WBGene00004187	prp-8	|	133.083	|		Pre-mRNA-splicing factor 8 homolog [Source:UniProtKB/Swiss-Prot;Acc:P34369]	|
WBGene00008185	best-10	|	133.005	|	Chloride channel;Chloride channel: bestrophin-related	Bestrophin homolog [Source:UniProtKB/TrEMBL;Acc:A0A131MBH1]	|
WBGene00005578	sri-66	|	132.842	|	Chemoreceptor;Chemoreceptor: Sri class	Serpentine Receptor, class I [Source:UniProtKB/TrEMBL;Acc:O45416]	|
WBGene00008034	C39E9.11	|	132.791	|			|
WBGene00005149	sre-1	|	132.788	|	Chemoreceptor;Chemoreceptor: Sre class	Serpentine receptor class epsilon-1 [Source:UniProtKB/Swiss-Prot;Acc:Q09213]	|
WBGene00044031	F49C5.9	|	132.785	|			|
WBGene00302964	Y62E10A.23	|	132.721	|			|
WBGene00003771	nlp-33	|	132.625	|	Neuropeptide;Neuropeptide: Neuropeptide-like proteins	Neuropeptide-like protein 33 [Source:UniProtKB/Swiss-Prot;Acc:Q95ZN4]	|
WBGene00015775	C14E2.6	|	132.557	|			|
WBGene00012288	sre-32	|	132.333	|	Chemoreceptor;Chemoreceptor: Sre class	Serpentine receptor class epsilon-32 [Source:UniProtKB/Swiss-Prot;Acc:P90837]	|
WBGene00010244	F58D5.5	|	132.26	|			|
WBGene00001949	hlh-2	|	131.771	|		Helix Loop Helix [Source:UniProtKB/TrEMBL;Acc:G5EEG9]	|
WBGene00008999	myrf-2	|	131.75	|		Myelin regulatory factor homolog 2 Myelin regulatory factor homolog 2, N-terminal Myelin regulatory factor homolog 2, C-terminal [Source:UniProtKB/Swiss-Prot;Acc:D9PTN5]	|
WBGene00005277	srh-54	|	131.684	|			|
WBGene00015811	C16A3.6	|	131.554	|			|
WBGene00000901	daf-5	|	131.391	|		Abnormal DAuer Formation DAF-5, a Ski oncogene homolog involved in a neuronal TGF beta pathway (71.0 kD) (Daf-5) [Source:UniProtKB/TrEMBL;Acc:G5EDM7]	|
WBGene00003052	lmn-1	|	131.143	|		Lamin-1 [Source:UniProtKB/Swiss-Prot;Acc:Q21443]	|
WBGene00015653	srz-78	|	131.092	|	Chemoreceptor;Chemoreceptor: Srz class	Serpentine Receptor, class Z [Source:UniProtKB/TrEMBL;Acc:O44459]	|
WBGene00009140	F26A3.1	|	130.991	|			|
WBGene00022235	sqd-1	|	130.971	|		Homologous to Drosophila SQD (Squid) protein [Source:UniProtKB/TrEMBL;Acc:Q8MXR6]	|
WBGene00006519	cox-6A	|	130.814	|		Cytochrome c oxidase subunit 6A, mitochondrial [Source:UniProtKB/Swiss-Prot;Acc:Q20779]	|
WBGene00001041	dnj-23	|	130.773	|		DNaJ domain (Prokaryotic heat shock protein) [Source:UniProtKB/TrEMBL;Acc:Q22751]	|
WBGene00009322	tbc-3	|	130.596	|		TBC (Tre-2/Bub2/Cdc16) domain family [Source:UniProtKB/TrEMBL;Acc:O45434]	|
WBGene00011528	fndc-1	|	130.575	|		FuN14 (FUN14) Domain Containing homolog [Source:UniProtKB/TrEMBL;Acc:Q22252]	|
WBGene00016935	ifta-1	|	130.57	|	Sensory cilia transport;Sensory cilia transport: IFT-A	IntraFlagellar Transport Associated [Source:UniProtKB/TrEMBL;Acc:Q18859]	|
WBGene00005999	srx-108	|	130.555	|	Chemoreceptor;Chemoreceptor: Srx class	Serpentine Receptor, class X [Source:UniProtKB/TrEMBL;Acc:O17096]	|
WBGene00022089	Y69A2AR.18	|	130.424	|			|
WBGene00018966	F56D2.5	|	130.281	|		RBR-type E3 ubiquitin transferase [Source:UniProtKB/TrEMBL;Acc:Q20871]	|
WBGene00012348	pptr-1	|	130.211	|		Serine/threonine-protein phosphatase 2A regulatory subunit pptr-1 [Source:UniProtKB/Swiss-Prot;Acc:O18178]	|
WBGene00014938	mdt-9	|	130.148	|		MeDiaTor [Source:UniProtKB/TrEMBL;Acc:Q0KHC0]	|
WBGene00005336	srh-117	|	130.125	|			|
WBGene00014701	C43D7.1	|	130.088	|			|
WBGene00012768	eef-1B.2	|	130.087	|		Probable elongation factor 1-beta/1-delta 2 [Source:UniProtKB/Swiss-Prot;Acc:Q9U2H9]	|
WBGene00001910	C50F4.6	|	129.86	|			|
WBGene00016706	C46C11.3	|	129.702	|			|
WBGene00015022	B0205.8	|	129.546	|			|
WBGene00007683	C18E9.2	|	128.975	|			|
WBGene00011636	cec-3	|	128.905	|		Chromo domain-containing protein cec-3 [Source:UniProtKB/Swiss-Prot;Acc:P45968]	|
WBGene00016009	C23F12.4	|	128.826	|			|
WBGene00021771	spe-48	|	128.716	|			|
WBGene00007784	ruvb-1	|	128.709	|		RuvB-like 1 [Source:UniProtKB/Swiss-Prot;Acc:O17607]	|
WBGene00002026	hsp-70	|	128.661	|		Heat Shock Protein [Source:UniProtKB/TrEMBL;Acc:O45246]	|
WBGene00000675	col-101	|	128.353	|		COLlagen [Source:UniProtKB/TrEMBL;Acc:O45105]	|
WBGene00000884	cyn-8	|	128.214	|		Peptidyl-prolyl cis-trans isomerase 8 [Source:UniProtKB/Swiss-Prot;Acc:P52016]	|
WBGene00009803	F47B8.2	|	127.745	|			|
WBGene00021039	W05F2.7	|	127.255	|			|
WBGene00001207	egl-43	|	127.032	|			|
WBGene00005584	sri-72	|	126.925	|	Chemoreceptor;Chemoreceptor: Sri class	Serpentine Receptor, class I [Source:UniProtKB/TrEMBL;Acc:A0A0B7H3M6]	|
WBGene00000284	cah-6	|	126.777	|	Gas receptors;Gas receptors: Carbonic anhydrase	Carbonic AnHydrase [Source:UniProtKB/TrEMBL;Acc:O02637]	|
WBGene00022755	nhr-250	|	126.723	|			|
WBGene00004732	sax-7	|	126.408	|	Extracellular Immunoglobulin;Extracellular Immunoglobulin: Ig domain proteins	Sensory AXon guidance [Source:UniProtKB/TrEMBL;Acc:W6RTH3]	|
WBGene00017316	F09G2.8	|	126.161	|		Probable phospholipase D F09G2.8 [Source:UniProtKB/Swiss-Prot;Acc:O17405]	|
WBGene00045100	K03D3.14	|	125.956	|			|
WBGene00019048	F58E2.4	|	125.928	|			|
WBGene00002210	kin-29	|	125.891	|		Serine/threonine-protein kinase kin-29 [Source:UniProtKB/Swiss-Prot;Acc:Q21017]	|
WBGene00012043	irld-52	|	125.762	|	Insulin/EGF receptor-like;Insulin/EGF receptor-like: secreted	Insulin/EGF-Receptor L Domain protein [Source:UniProtKB/TrEMBL;Acc:O45835]	|
WBGene00011631	T08G11.4	|	125.734	|			|
WBGene00016494	C37A2.8	|	125.513	|			|
WBGene00015955	C18B2.4	|	125.443	|			|
WBGene00016928	srb-19	|	125.332	|	Chemoreceptor;Chemoreceptor: Srb class	Serpentine Receptor, class B (Beta) [Source:UniProtKB/TrEMBL;Acc:Q5CCI8]	|
WBGene00020298	T07A9.10	|	125.324	|	Synaptic release machinery;Synaptic release machinery: Munc-19		|
WBGene00003443	msp-50	|	125.256	|		Major sperm protein 19/31/40/45/50/51/53/59/61/65/81/113/142 [Source:UniProtKB/Swiss-Prot;Acc:P53017]	|
WBGene00006982	zig-5	|	125.152	|	Extracellular Immunoglobulin;Extracellular Immunoglobulin: Ig domain proteins	Zwei Ig domain protein zig-5 [Source:UniProtKB/Swiss-Prot;Acc:Q9XXD7]	|
WBGene00013317	Y57G11C.22	|	124.983	|	PDZ domain protein		|
WBGene00077606	C06C6.10	|	124.923	|			|
WBGene00000376	ccr-4	|	124.689	|		CCR (Yeast CCR4/NOT complex component) homolog [Source:UniProtKB/TrEMBL;Acc:A0A061AD13]	|
WBGene00016782	phat-3	|	124.292	|		PHAryngeal gland Toxin-related [Source:UniProtKB/TrEMBL;Acc:O16225]	|
WBGene00009578	F40F8.5	|	123.812	|			|
WBGene00000752	col-179	|	123.681	|		COLlagen [Source:UniProtKB/TrEMBL;Acc:O17642]	|
WBGene00009784	F46C5.9	|	123.397	|			|
WBGene00271716	F39E9.28	|	123.32	|			|
WBGene00016653	ssb-1	|	123.264	|		Sjogren Syndrome antigen B homolog [Source:UniProtKB/TrEMBL;Acc:O01806]	|
WBGene00004703	rsp-6	|	123.155	|		Probable splicing factor, arginine/serine-rich 6 [Source:UniProtKB/Swiss-Prot;Acc:Q18409]	|
WBGene00007619	C15H11.11	|	123.066	|			|
WBGene00017166	aldo-2	|	123.003	|		Fructose-bisphosphate aldolase 2 [Source:UniProtKB/Swiss-Prot;Acc:P46563]	|
WBGene00008262	ril-1	|	122.93	|		RNAi-Induced Longevity [Source:UniProtKB/TrEMBL;Acc:O17694]	|
WBGene00007531	C11H1.7	|	122.837	|			|
WBGene00003795	npp-9	|	122.719	|		Nuclear Pore complex Protein [Source:UniProtKB/TrEMBL;Acc:Q86G90]	|
WBGene00020391	cct-7	|	122.636	|		T-complex protein 1 subunit eta [Source:UniProtKB/TrEMBL;Acc:Q9TZS5]	|
WBGene00013538	ari-1.4	|	122.592	|		RBR-type E3 ubiquitin transferase [Source:UniProtKB/TrEMBL;Acc:D3NQB5]	|
WBGene00019188	H11E01.3	|	122.591	|			|
WBGene00020279	glb-25	|	122.444	|	Gas receptors;Gas receptors: Globin	GLoBin related; Globin [Source:UniProtKB/TrEMBL;Acc:G5EGB6]	|
WBGene00020736	T23F2.3	|	122.431	|		UPF0057 membrane protein T23F2.3 [Source:UniProtKB/Swiss-Prot;Acc:Q22700]	|
WBGene00011312	trcs-2	|	121.997	|		TRansport of membrane to Cell Surface [Source:UniProtKB/TrEMBL;Acc:Q22047]	|
WBGene00003959	pcp-4	|	121.922	|		Prolyl Carboxy Peptidase like [Source:UniProtKB/TrEMBL;Acc:Q9GRV9]	|
WBGene00008683	repo-1	|	121.75	|		REversed POlarity in early embryos [Source:UniProtKB/TrEMBL;Acc:Q19335]	|
WBGene00000371	cox-5B	|	121.74	|		Cytochrome OXidase assembly protein [Source:UniProtKB/TrEMBL;Acc:P90849]	|
WBGene00012626	famh-161	|	121.472	|			|
WBGene00003229	mex-3	|	121.47	|		Muscle EXcess [Source:UniProtKB/TrEMBL;Acc:V6CKQ3]	|
WBGene00000773	cpf-1	|	121.419	|		Cleavage and Polyadenylation Factor [Source:UniProtKB/TrEMBL;Acc:Q19864]	|
WBGene00011722	rbm-22	|	121.378	|		RNA Binding Motif protein homolog [Source:UniProtKB/TrEMBL;Acc:A0A061ACS6]	|
WBGene00007246	nspb-10	|	121.374	|		Nematode Specific Peptide family, group B [Source:UniProtKB/TrEMBL;Acc:O45237]	|
WBGene00007390	lmtr-3	|	121.264	|		Late endosomal/lysosomal adaptor, Mapk (MAPK) and mToR (MTOR) activator homolog [Source:UniProtKB/TrEMBL;Acc:Q8WQG5]	|
WBGene00011110	prdx-3	|	121.15	|		Probable peroxiredoxin prdx-3 [Source:UniProtKB/Swiss-Prot;Acc:Q21824]	|
WBGene00000739	col-166	|	121.104	|		COLlagen [Source:UniProtKB/TrEMBL;Acc:Q86FL7]	|
WBGene00020604	T20B12.7	|	120.743	|		Anamorsin homolog [Source:UniProtKB/Swiss-Prot;Acc:P41847]	|
WBGene00005655	srr-4	|	120.679	|	Chemoreceptor;Chemoreceptor: Srr class	Serpentine Receptor, class R [Source:UniProtKB/TrEMBL;Acc:H2KYR4]	|
WBGene00013027	Y49A3A.4	|	120.362	|			|
WBGene00001994	hpk-1	|	120.074	|		Homeodomain-interacting protein kinase 1 [Source:UniProtKB/Swiss-Prot;Acc:Q8MQ70]	|
WBGene00001768	gst-20	|	120.003	|		Glutathione S-Transferase [Source:UniProtKB/TrEMBL;Acc:G5EC71]	|
WBGene00006843	unc-119	|	119.973	|			|
WBGene00003901	paa-1	|	119.963	|		Probable serine/threonine-protein phosphatase PP2A regulatory subunit [Source:UniProtKB/Swiss-Prot;Acc:Q09543]	|
WBGene00004509	rrf-2	|	119.942	|		RNA-dependent RNA polymerase Family [Source:UniProtKB/TrEMBL;Acc:G5EFA8]	|
WBGene00016489	fubl-3	|	119.942	|		FUBp (FUBP) Like [Source:UniProtKB/TrEMBL;Acc:Q9BLA0]	|
WBGene00017066	maco-1	|	119.722	|		Macoilin [Source:UniProtKB/Swiss-Prot;Acc:P91193]	|
WBGene00022013	Y60C6A.1	|	119.698	|			|
WBGene00023036	F39E9.10	|	119.484	|			|
WBGene00004052	parg-2	|	119.476	|		Poly(ADP-ribose) glycohydrolase 2 [Source:UniProtKB/Swiss-Prot;Acc:Q9N5L4]	|
WBGene00010820	M01G12.6	|	119.446	|			|
WBGene00021611	nhr-238	|	119.441	|		Nuclear Hormone Receptor family [Source:UniProtKB/TrEMBL;Acc:Q966B7]	|
WBGene00009574	F40E10.6	|	119.398	|			|
WBGene00015128	B0303.7	|	119.371	|			|
WBGene00000491	che-12	|	119.286	|		Crescerin-like protein che-12 [Source:UniProtKB/Swiss-Prot;Acc:Q17423]	|
WBGene00019196	H14A12.3	|	119.236	|			|
WBGene00007048	nfx-1	|	119.08	|		Transcriptional repressor NF-X1 homolog [Source:UniProtKB/Swiss-Prot;Acc:Q18034]	|
WBGene00045386	nlp-76	|	119.046	|	Neuropeptide;Neuropeptide: Neuropeptide-like proteins	Neuropeptide-Like Protein [Source:UniProtKB/TrEMBL;Acc:A5JYR5]	|
WBGene00019537	K08D12.3	|	118.948	|			|
WBGene00017023	D1022.4	|	118.788	|			|
WBGene00021382	Y37F4.1	|	118.644	|			|
WBGene00017925	F29B9.11	|	118.597	|			|
WBGene00004736	sca-1	|	118.16	|		Calcium-transporting ATPase [Source:UniProtKB/TrEMBL;Acc:Q9XU13]	|
WBGene00005574	sri-62	|	118.054	|	Chemoreceptor;Chemoreceptor: Sri class	Serpentine Receptor, class I [Source:UniProtKB/TrEMBL;Acc:Q965L7]	|
WBGene00009888	F49E2.5	|	118.046	|			|
WBGene00005462	srh-256	|	117.996	|			|
WBGene00011268	pde-12	|	117.937	|		PhosphoDiEsterase [Source:UniProtKB/TrEMBL;Acc:O18005]	|
WBGene00021286	tald-1	|	117.932	|		Transaldolase [Source:UniProtKB/TrEMBL;Acc:Q8T876]	|
WBGene00019479	K07C11.7	|	117.869	|		UPF0046 protein K07C11.7 [Source:UniProtKB/Swiss-Prot;Acc:Q21268]	|
WBGene00015561	C07A12.7	|	117.734	|			|
WBGene00016316	C32D5.8	|	117.445	|			|
WBGene00007022	mdt-22	|	117.39	|		Mediator of RNA polymerase II transcription subunit 22 [Source:UniProtKB/Swiss-Prot;Acc:Q23679]	|
WBGene00016507	abhd-5.2	|	117.209	|		Abhydrolase domain-containing protein abhd-5.2 [Source:UniProtKB/Swiss-Prot;Acc:H2KZ86]	|
WBGene00017862	F27D9.3	|	117.196	|			|
WBGene00001345	fos-1	|	117.072	|		Transcription factor fos-1 [Source:UniProtKB/Swiss-Prot;Acc:G5ECG2]	|
WBGene00003953	pbs-7	|	117.06	|		Proteasome subunit beta [Source:UniProtKB/TrEMBL;Acc:P90868]	|
WBGene00302980	F53E2.2	|	117.049	|		Actin-depolymerizing factor 1, isoforms a/b [Source:UniProtKB/Swiss-Prot;Acc:Q07750]	|
WBGene00022484	fbxa-77	|	116.981	|		F-box A protein [Source:UniProtKB/TrEMBL;Acc:Q95Y63]	|
WBGene00003511	mxl-3	|	116.868	|		MaX-Like [Source:UniProtKB/TrEMBL;Acc:Q18711]	|
WBGene00022169	Y71H2AM.4	|	116.861	|			|
WBGene00017150	EGAP5.1	|	116.841	|			|
WBGene00005399	srh-184	|	116.681	|	Chemoreceptor;Chemoreceptor: Srh class	Serpentine Receptor, class H [Source:UniProtKB/TrEMBL;Acc:Q18952]	|
WBGene00020714	T23B3.6	|	116.655	|			|
WBGene00006063	sto-1	|	116.417	|	Auxiliary subunit for:: DEG/ENaC channels (and perhaps TRP)	Stomatin-1 [Source:UniProtKB/Swiss-Prot;Acc:Q19200]	|
WBGene00001743	grp-1	|	116.407	|		GTP exchange factor for ARFs 1 [Source:UniProtKB/Swiss-Prot;Acc:P34512]	|
WBGene00194909	F41E6.17	|	116.394	|			|
WBGene00001233	eif-3.K	|	116.281	|		Eukaryotic translation initiation factor 3 subunit K [Source:UniProtKB/Swiss-Prot;Acc:Q9XUP3]	|
WBGene00018572	lin-42	|	116.248	|		Period protein homolog lin-42 [Source:UniProtKB/Swiss-Prot;Acc:Q65ZG8]	|
WBGene00018622	nhr-190	|	116.201	|		Nuclear Hormone Receptor family [Source:UniProtKB/TrEMBL;Acc:O44593]	|
WBGene00004208	ptc-1	|	116.092	|			|
WBGene00007366	C06B3.7	|	116.074	|			|
WBGene00015470	C05D2.10	|	115.964	|			|
WBGene00000123	ama-1	|	115.84	|		DNA-directed RNA polymerase II subunit RPB1 [Source:UniProtKB/Swiss-Prot;Acc:P16356]	|
WBGene00011707	T11B7.2	|	115.773	|			|
WBGene00005512	srh-105	|	115.773	|	Chemoreceptor;Chemoreceptor: Srh class	Serpentine Receptor, class H [Source:UniProtKB/TrEMBL;Acc:Q9TXQ3]	|
WBGene00020854	T27C4.1	|	115.758	|			|
WBGene00012375	mecr-1	|	115.583	|		Enoyl-[acyl-carrier-protein] reductase, mitochondrial [Source:UniProtKB/Swiss-Prot;Acc:O45903]	|
WBGene00003163	mdl-1	|	115.567	|		MAD-Like; MAD-like-1 homolog [Source:UniProtKB/TrEMBL;Acc:G5EG44]	|
WBGene00016650	ubr-4	|	115.454	|		UBR E3 ubiquitin ligase homolog [Source:UniProtKB/TrEMBL;Acc:Q7KQG4]	|
WBGene00015339	C02E7.6	|	115.451	|			|
WBGene00012553	cox-5A	|	115.358	|		Cytochrome c oxidase subunit 5A, mitochondrial [Source:UniProtKB/Swiss-Prot;Acc:P55954]	|
WBGene00014255	ZK1320.5	|	115.253	|			|
WBGene00001842	her-1	|	115.129	|			|
WBGene00004915	snr-2	|	115.123	|		Probable small nuclear ribonucleoprotein-associated protein B [Source:UniProtKB/Swiss-Prot;Acc:P91918]	|
WBGene00014734	F11A3.3	|	115.069	|			|
WBGene00008338	pafo-1	|	115.044	|		RNA polymerase II-associated factor 1 homolog [Source:UniProtKB/Swiss-Prot;Acc:P90783]	|
WBGene00013276	sre-42	|	114.931	|	Chemoreceptor;Chemoreceptor: Sre class	Serpentine Receptor, class E (Epsilon) [Source:UniProtKB/TrEMBL;Acc:Q9XWH7]	|
WBGene00020849	nhr-225	|	114.827	|		Nuclear Hormone Receptor family [Source:UniProtKB/TrEMBL;Acc:O16663]	|
WBGene00019007	ucr-11	|	114.637	|		Ubiquinol-Cytochrome c oxidoReductase complex [Source:UniProtKB/TrEMBL;Acc:Q8MXI1]	|
WBGene00008777	F13H10.6	|	114.62	|			|
WBGene00021374	Y37E11B.1	|	114.54	|			|
WBGene00016310	C32D5.1	|	114.47	|			|
WBGene00005266	srh-43	|	114.388	|			|
WBGene00006538	tbb-4	|	114.382	|		Tubulin beta-4 chain [Source:UniProtKB/Swiss-Prot;Acc:P41937]	|
WBGene00005486	srh-281	|	114.332	|	Chemoreceptor;Chemoreceptor: Srh class	Serpentine Receptor, class H [Source:UniProtKB/TrEMBL;Acc:O17786]	|
WBGene00012019	dkf-2	|	114.319	|		Serine/threonine-protein kinase dkf-2 [Source:UniProtKB/Swiss-Prot;Acc:O45818]	|
WBGene00004148	pqn-65	|	114.307	|		Prion-like-(Q/N-rich)-domain-bearing protein [Source:UniProtKB/TrEMBL;Acc:H2KYH2]	|
WBGene00006565	tfg-1	|	114.227	|		TFG related [Source:UniProtKB/TrEMBL;Acc:Q9U1W1]	|
WBGene00020225	sre-40	|	114.198	|	Chemoreceptor;Chemoreceptor: Sre class	Serpentine Receptor, class E (Epsilon) [Source:UniProtKB/TrEMBL;Acc:Q22209]	|
WBGene00002363	let-92	|	113.943	|		Serine/threonine-protein phosphatase 2A catalytic subunit [Source:UniProtKB/Swiss-Prot;Acc:G5EGK8]	|
WBGene00014190	irld-62	|	113.57	|	Insulin/EGF receptor-like;Insulin/EGF receptor-like: secreted	Insulin/EGF-Receptor L Domain protein [Source:UniProtKB/TrEMBL;Acc:O45984]	|
WBGene00009882	vha-17	|	113.485	|		V-type proton ATPase subunit e [Source:UniProtKB/Swiss-Prot;Acc:Q20591]	|
WBGene00005364	srh-148	|	113.469	|	Chemoreceptor;Chemoreceptor: Srh class	Serpentine Receptor, class H [Source:UniProtKB/TrEMBL;Acc:Q93867]	|
WBGene00005305	srh-84	|	113.408	|			|
WBGene00022376	Y94H6A.3	|	113.192	|			|
WBGene00012615	dct-16	|	113.164	|		DAF-16/FOXO Controlled, germline Tumor affecting [Source:UniProtKB/TrEMBL;Acc:D4YWC3]	|
WBGene00000727	col-154	|	112.899	|		COLlagen [Source:UniProtKB/TrEMBL;Acc:Q20805]	|
WBGene00006895	ver-2	|	112.836	|			|
WBGene00009739	F45H10.2	|	112.792	|			|
WBGene00007554	pptr-2	|	112.652	|		Serine/threonine protein phosphatase 2A regulatory subunit [Source:UniProtKB/TrEMBL;Acc:A9UJN4]	|
WBGene00010187	F57B1.1	|	112.422	|			|
WBGene00018111	F36H9.2	|	112.355	|			|
WBGene00016165	wdr-60	|	112.331	|			|
WBGene00016298	fbxc-14	|	112.253	|		F-box C protein [Source:UniProtKB/TrEMBL;Acc:P91115]	|
WBGene00003403	mps-1	|	112.129	|	Auxiliary subunit for:: Voltage-gated K channels	MiRP K channel accessory Subunit [Source:UniProtKB/TrEMBL;Acc:Q27GU3]	|
WBGene00021811	ral-1	|	111.764	|		RAL (Ras-related GTPase) homolog [Source:UniProtKB/TrEMBL;Acc:Q9N3F8]	|
WBGene00010470	cdr-4	|	111.506	|		CaDmium Responsive; Cadmium-inducible lysosomal protein CDR-4 [Source:UniProtKB/TrEMBL;Acc:G5EDZ7]	|
WBGene00006918	vha-9	|	111.269	|		Probable V-type proton ATPase subunit F [Source:UniProtKB/Swiss-Prot;Acc:Q23680]	|
WBGene00000114	alh-8	|	111.263	|		Probable methylmalonate-semialdehyde dehydrogenase [acylating], mitochondrial [Source:UniProtKB/Swiss-Prot;Acc:P52713]	|
WBGene00006587	tnt-2	|	111.228	|		TropoNin T [Source:UniProtKB/TrEMBL;Acc:Q7Z071]	|
WBGene00006468	rhgf-1	|	111.207	|	GPCR signalling;GPCR signalling: RGS family ;PDZ domain protein	RHo Guanine nucleotide exchange Factor [Source:UniProtKB/TrEMBL;Acc:G5EFE1]	|
WBGene00017557	nep-11	|	111.2	|	Neuropeptide processing;Neuropeptide processing: Degradation	Neprilysin-11 [Source:UniProtKB/Swiss-Prot;Acc:O16796]	|
WBGene00015809	C16A3.4	|	111.183	|			|
WBGene00013604	Y87G2A.18	|	111.147	|			|
WBGene00010863	M04D8.5	|	111.132	|			|
WBGene00020951	sna-1	|	111.076	|		Small Nuclear RNA (snRNA) Associated protein [Source:UniProtKB/TrEMBL;Acc:O45149]	|
WBGene00002196	kin-10	|	111.025	|		Casein kinase II subunit beta [Source:UniProtKB/Swiss-Prot;Acc:P28548]	|
WBGene00000704	col-130	|	111.024	|		COLlagen [Source:UniProtKB/TrEMBL;Acc:Q19218]	|
WBGene00003962	pdi-1	|	110.797	|		Protein disulfide-isomerase 1 [Source:UniProtKB/Swiss-Prot;Acc:Q17967]	|
WBGene00019996	R10F2.5	|	110.754	|			|
WBGene00003123	mag-1	|	110.67	|		Protein mago nashi homolog [Source:UniProtKB/Swiss-Prot;Acc:P49029]	|
WBGene00023506	srz-11	|	110.66	|	Chemoreceptor;Chemoreceptor: Srz class	Serpentine Receptor, class Z [Source:UniProtKB/TrEMBL;Acc:Q5WRL4]	|
WBGene00000092	ags-3	|	110.328	|	GPCR signalling;GPCR signalling: GPR/GoLoco	Activator of G protein Signalling [Source:UniProtKB/TrEMBL;Acc:A0A131MBW5]	|
WBGene00020910	dgtr-1	|	110.254	|		DGAT (Acyl-CoA:DiacylGlycerol AcylTransferase) Related [Source:UniProtKB/TrEMBL;Acc:Q23067]	|
WBGene00000248	ben-1	|	110.242	|		Tubulin beta chain [Source:UniProtKB/TrEMBL;Acc:Q18817]	|
WBGene00194650	C36A4.14	|	110.169	|			|
WBGene00005461	srh-255	|	110.165	|	Chemoreceptor;Chemoreceptor: Srh class	Serpentine Receptor, class H [Source:UniProtKB/TrEMBL;Acc:Q7YXB0]	|
WBGene00012230	cacn-1	|	110.083	|		Cactin [Source:UniProtKB/Swiss-Prot;Acc:G5EG14]	|
WBGene00016500	memo-1	|	110.053	|		Protein memo-1 homolog, partial [Source:RefSeq peptide;Acc:NP_001337309]	|
WBGene00001431	fkb-6	|	109.967	|		Peptidylprolyl isomerase [Source:UniProtKB/TrEMBL;Acc:O45418]	|
WBGene00011638	ostb-1	|	109.917	|		Dolichyl-diphosphooligosaccharide--protein glycosyltransferase 48 kDa subunit [Source:UniProtKB/Swiss-Prot;Acc:P45971]	|
WBGene00002957	let-858	|	109.831	|		Pre-mRNA-splicing factor CWC22 homolog [Source:UniProtKB/Swiss-Prot;Acc:Q17336]	|
WBGene00009559	mtx-1	|	109.783	|		Metaxin-1 homolog [Source:UniProtKB/Swiss-Prot;Acc:O45503]	|
WBGene00015468	madf-11	|	109.778	|		MADF domain transcription factor [Source:UniProtKB/TrEMBL;Acc:H2KYG5]	|
WBGene00017775	F25B5.3	|	109.647	|		Putative cytosolic 5'-nucleotidase 3 [Source:UniProtKB/Swiss-Prot;Acc:Q09315]	|
WBGene00020826	T26A8.3	|	109.512	|			|
WBGene00003637	nhr-47	|	109.45	|		Nuclear hormone receptor family member nhr-47 [Source:UniProtKB/Swiss-Prot;Acc:Q17370]	|
WBGene00005860	srw-113	|	109.397	|	Chemoreceptor;Chemoreceptor: Srw class;Possible neuropeptide receptor;Possible neuropeptide receptor: Similar to:;Possible neuropeptide receptor: fly FMRFamide receptor	Serpentine Receptor, class W [Source:UniProtKB/TrEMBL;Acc:O45991]	|
WBGene00004751	sea-2	|	109.226	|		Signal Element on Autosome [Source:UniProtKB/TrEMBL;Acc:A0A0K3ARE6]	|
WBGene00018184	F38E9.1	|	108.903	|			|
WBGene00011326	T01D3.1	|	108.824	|			|
WBGene00021304	nphp-2	|	108.821	|		NePHronoPhthisis (Human kidney disease) homolog [Source:UniProtKB/TrEMBL;Acc:A0A0K3AVZ6]	|
WBGene00021839	nduf-5	|	108.662	|		NADH Ubiquinone oxidoreductase Fe-S protein [Source:UniProtKB/TrEMBL;Acc:Q9N3D9]	|
WBGene00005332	srh-113	|	108.613	|	Chemoreceptor;Chemoreceptor: Srh class	Serpentine Receptor, class H [Source:UniProtKB/TrEMBL;Acc:Q9XXQ1]	|
WBGene00003048	lit-1	|	108.612	|		Serine/threonine kinase NLK [Source:UniProtKB/Swiss-Prot;Acc:Q9U9Y8]	|
WBGene00005541	sri-29	|	108.414	|	Chemoreceptor;Chemoreceptor: Sri class	Serpentine Receptor, class I [Source:UniProtKB/TrEMBL;Acc:O17170]	|
WBGene00010564	ath-1	|	108.413	|		Acyl protein THioesterase family [Source:UniProtKB/TrEMBL;Acc:A0A061ACY0]	|
WBGene00012036	clec-103	|	108.323	|		C-type LECtin [Source:UniProtKB/TrEMBL;Acc:O45829]	|
WBGene00018973	srz-20	|	108.316	|	Chemoreceptor;Chemoreceptor: Srz class	Serpentine Receptor, class Z [Source:UniProtKB/TrEMBL;Acc:U4PCJ9]	|
WBGene00008144	gasr-8	|	108.244	|		GAS (Human Growth Arrest-Specific) Related [Source:UniProtKB/TrEMBL;Acc:Q18689]	|
WBGene00016194	C28H8.3	|	108.15	|		Uncharacterized helicase C28H8.3 [Source:UniProtKB/Swiss-Prot;Acc:Q09475]	|
WBGene00020457	fbxa-67	|	108.11	|		F-box A protein [Source:UniProtKB/TrEMBL;Acc:Q9TZ24]	|
WBGene00007192	B0491.5	|	108.053	|			|
WBGene00012961	Y47H10A.5	|	108.05	|			|
WBGene00000281	cah-3	|	108.016	|	Gas receptors;Gas receptors: Carbonic anhydrase	Putative carbonic anhydrase 3 [Source:UniProtKB/Swiss-Prot;Acc:Q27504]	|
WBGene00019592	K09F6.9	|	107.974	|			|
WBGene00013278	Y57A10B.6	|	107.955	|			|
WBGene00016639	C44B12.6	|	107.819	|			|
WBGene00008865	F15G9.1	|	107.736	|			|
WBGene00011045	gpx-2	|	107.652	|		Glutathione peroxidase 2 [Source:UniProtKB/Swiss-Prot;Acc:O62327]	|
WBGene00000800	cars-1	|	107.587	|		Cysteinyl Amino-acyl tRNA Synthetase [Source:UniProtKB/TrEMBL;Acc:O76618]	|
WBGene00009912	srz-94	|	107.371	|	Chemoreceptor;Chemoreceptor: Srz class	Serpentine Receptor, class Z [Source:UniProtKB/TrEMBL;Acc:Q9XV00]	|
WBGene00004930	sod-1	|	107.287	|		Superoxide dismutase [Cu-Zn] [Source:UniProtKB/Swiss-Prot;Acc:P34697]	|
WBGene00022485	fbxa-63	|	107.204	|		F-box A protein [Source:UniProtKB/TrEMBL;Acc:Q95Y64]	|
WBGene00002099	ins-16	|	107.178	|	Neuropeptide;Neuropeptide: Insulin-related peptides	INSulin related [Source:UniProtKB/TrEMBL;Acc:Q7KX46]	|
WBGene00021643	ccep-290	|	107.127	|		CEntrosomal Protein [Source:UniProtKB/TrEMBL;Acc:A2A266]	|
WBGene00007786	rmd-2	|	107.07	|		Regulator of Microtubule Dynamics [Source:UniProtKB/TrEMBL;Acc:B2D6P1]	|
WBGene00005406	srh-193	|	107.044	|	Chemoreceptor;Chemoreceptor: Srh class	Serpentine Receptor, class H [Source:UniProtKB/TrEMBL;Acc:Q22989]	|
WBGene00000392	cdd-2	|	106.992	|		Cytidine deaminase [Source:UniProtKB/TrEMBL;Acc:Q20628]	|
WBGene00021960	Y57E12AM.1	|	106.875	|		Transmembrane protein 258 [Source:UniProtKB/Swiss-Prot;Acc:Q965T1]	|
WBGene00005206	srg-49	|	106.808	|			|
WBGene00017734	F23C8.5	|	106.653	|			|
WBGene00005249	srh-25	|	106.627	|	Chemoreceptor;Chemoreceptor: Srh class	Serpentine Receptor, class H [Source:UniProtKB/TrEMBL;Acc:Q18834]	|
WBGene00016374	swd-2.2	|	106.505	|		Set1 WD40 repeat protein [Source:UniProtKB/TrEMBL;Acc:Q18403]	|
WBGene00003063	lpd-7	|	106.383	|		Pescadillo homolog [Source:UniProtKB/Swiss-Prot;Acc:Q95Y89]	|
WBGene00003989	pfn-1	|	106.369	|		Profilin-1 [Source:UniProtKB/Swiss-Prot;Acc:Q9XW16]	|
WBGene00019953	wapl-1	|	106.198	|		Wings apart-like protein homolog 1 [Source:UniProtKB/Swiss-Prot;Acc:H2L0H5]	|
WBGene00010560	eif-2beta	|	106.194	|		Eukaryotic translation initiation factor 2 subunit 2 [Source:UniProtKB/Swiss-Prot;Acc:Q21230]	|
WBGene00020866	vps-24	|	106.163	|		Related to yeast Vacuolar Protein Sorting factor [Source:UniProtKB/TrEMBL;Acc:Q9GYK4]	|
WBGene00003077	lsm-3	|	106.13	|		U6 snRNA-associated Sm-like protein LSm3 [Source:UniProtKB/TrEMBL;Acc:Q9U1W8]	|
WBGene00010319	F59B10.3	|	106.085	|			|
WBGene00009712	F44G4.2	|	106.064	|		Probable NADH dehydrogenase [ubiquinone] 1 beta subcomplex subunit 2, mitochondrial [Source:UniProtKB/Swiss-Prot;Acc:Q20412]	|
WBGene00195084	C43C3.4	|	105.939	|			|
WBGene00017075	nap-1	|	105.856	|		Nucleosome Assembly Protein [Source:UniProtKB/TrEMBL;Acc:Q19007]	|
WBGene00017466	F14F9.3	|	105.669	|			|
WBGene00020482	T13C2.7	|	105.614	|			|
WBGene00011015	R04F11.2	|	105.608	|			|
WBGene00022601	ZC404.1	|	105.467	|			|
WBGene00016964	C56C10.7	|	105.43	|		Probable trafficking protein particle complex subunit 13 homolog [Source:UniProtKB/Swiss-Prot;Acc:Q95QQ2]	|
WBGene00005431	srh-221	|	105.419	|			|
WBGene00012625	Y38H6C.13	|	105.312	|			|
WBGene00017789	F25E5.8	|	105.169	|			|
WBGene00004184	T19D2.2	|	104.778	|		Putative prenylated protein tyrosine phosphatase [Source:UniProtKB/TrEMBL;Acc:G5EG43]	|
WBGene00017744	fbxc-54	|	104.691	|		F-box C protein [Source:UniProtKB/TrEMBL;Acc:O17067]	|
WBGene00012156	ebp-2	|	104.642	|		Microtubule End Binding Protein [Source:UniProtKB/TrEMBL;Acc:Q9XXA2]	|
WBGene00020386	cyp-34A4	|	104.619	|		CYtochrome P450 family [Source:UniProtKB/TrEMBL;Acc:O61935]	|
WBGene00022745	ZK470.2	|	104.527	|			|
WBGene00021063	sbds-1	|	104.355	|		Ribosome maturation protein SBDS [Source:UniProtKB/Swiss-Prot;Acc:Q23202]	|
WBGene00002202	kin-19	|	104.318	|		Casein kinase I isoform alpha [Source:UniProtKB/Swiss-Prot;Acc:P42168]	|
WBGene00009180	nurf-1	|	104.15	|		Nucleosome-remodeling factor subunit NURF301-like [Source:UniProtKB/Swiss-Prot;Acc:Q6BER5]	|
WBGene00005472	srh-266	|	104.112	|	Chemoreceptor;Chemoreceptor: Srh class	Serpentine Receptor, class H [Source:UniProtKB/TrEMBL;Acc:O17130]	|
WBGene00004319	rbr-2	|	104.04	|		Lysine-specific demethylase rbr-2 [Source:UniProtKB/Swiss-Prot;Acc:Q23541]	|
WBGene00010433	H40L08.1	|	103.941	|			|
WBGene00009336	F32D8.14	|	103.85	|			|
WBGene00018725	kreg-1	|	103.846	|			|
WBGene00007370	str-264	|	103.845	|		Seven TM Receptor [Source:UniProtKB/TrEMBL;Acc:O17571]	|
WBGene00015064	B0228.7	|	103.752	|		S-methyl-5'-thioadenosine phosphorylase [Source:UniProtKB/Swiss-Prot;Acc:Q09438]	|
WBGene00001840	hel-1	|	103.748	|		Spliceosome RNA helicase DDX39B homolog [Source:UniProtKB/Swiss-Prot;Acc:Q18212]	|
WBGene00008053	cdc-48.2	|	103.747	|		Transitional endoplasmic reticulum ATPase homolog 2 [Source:UniProtKB/Swiss-Prot;Acc:P54812]	|
WBGene00020039	R12E2.14	|	103.612	|			|
WBGene00012557	Y37D8A.19	|	103.6	|			|
WBGene00005565	sri-53	|	103.552	|	Chemoreceptor;Chemoreceptor: Sri class	Serpentine Receptor, class I [Source:UniProtKB/TrEMBL;Acc:P91553]	|
WBGene00003924	pas-3	|	103.519	|		Proteasome subunit alpha type-4 [Source:UniProtKB/Swiss-Prot;Acc:Q9N599]	|
WBGene00020246	clic-1	|	103.329	|		Clathrin light chain [Source:UniProtKB/TrEMBL;Acc:P90961]	|
WBGene00020999	W03F9.1	|	103.221	|		Zinc finger protein ZPR1 homolog [Source:UniProtKB/Swiss-Prot;Acc:O16999]	|
WBGene00015560	C07A12.2	|	103.132	|			|
WBGene00022824	ZK813.5	|	102.951	|	Neuropeptide receptors		|
WBGene00022500	lfi-1	|	102.881	|		Lin-5 (Five) Interacting protein [Source:UniProtKB/TrEMBL;Acc:H2L0I3]	|
WBGene00016235	C29H12.2	|	102.871	|			|
WBGene00000166	apt-9	|	102.79	|		AdaPTin or adaptin-related protein [Source:UniProtKB/TrEMBL;Acc:Q23165]	|
WBGene00001225	eif-3.B	|	102.783	|		Eukaryotic translation initiation factor 3 subunit B [Source:UniProtKB/Swiss-Prot;Acc:Q9XWI6]	|
WBGene00004895	smu-1	|	102.721	|		Smu-1 suppressor of mec-8 and unc-52 protein [Source:UniProtKB/Swiss-Prot;Acc:G5EEG7]	|
WBGene00019401	nuo-4	|	102.698	|		NADH dehydrogenase [ubiquinone] 1 alpha subcomplex subunit 10, mitochondrial [Source:UniProtKB/TrEMBL;Acc:Q21233]	|
WBGene00006840	unc-116	|	102.665	|	Kinesin;Kinesin: Family:Kinesin-1;Kinesin: Function:Vesicle, organelle and mRNA transport	Kinesin heavy chain [Source:UniProtKB/Swiss-Prot;Acc:P34540]	|
WBGene00012472	Y17G7B.21	|	102.648	|			|
WBGene00008624	crld-1	|	102.581	|		Cysteine Rich with egf (EGF) Like Domains homolog [Source:UniProtKB/TrEMBL;Acc:A7LPH5]	|
WBGene00019495	sdz-24	|	102.57	|		SKN-1 Dependent Zygotic transcript [Source:UniProtKB/TrEMBL;Acc:O16689]	|
WBGene00008307	ncs-5	|	102.566	|	Calcium binding protein;Calcium binding protein: NCS family	Neuronal Calcium Sensor family [Source:UniProtKB/TrEMBL;Acc:D5MCU2]	|
WBGene00013647	Y105C5B.5	|	102.453	|			|
WBGene00013766	prmt-1	|	102.449	|		Protein arginine N-methyltransferase 1 [Source:UniProtKB/Swiss-Prot;Acc:Q9U2X0]	|
WBGene00011352	rskn-1	|	102.351	|		Putative ribosomal protein S6 kinase alpha-1 [Source:UniProtKB/Swiss-Prot;Acc:Q21734]	|
WBGene00006433	sdhb-1	|	102.256	|		Succinate dehydrogenase [ubiquinone] iron-sulfur subunit, mitochondrial [Source:UniProtKB/Swiss-Prot;Acc:Q09545]	|
WBGene00019774	M04G7.3	|	102.234	|	Neuropeptide receptors;Neuropeptide receptors: Related family with no specific orthologs 4		|
WBGene00007910	C34B4.5	|	102.17	|			|
WBGene00002994	lin-5	|	102.149	|		Spindle apparatus protein lin-5 [Source:UniProtKB/Swiss-Prot;Acc:P45970]	|
WBGene00004266	rab-1	|	102.031	|		RAB family [Source:UniProtKB/TrEMBL;Acc:Q9UAQ6]	|
WBGene00020868	eif-1	|	101.989	|		Eukaryotic Initiation Factor [Source:UniProtKB/TrEMBL;Acc:Q967F1]	|
WBGene00000854	cux-7	|	101.914	|		Clk-2 Upstream, human gene XE7 related [Source:UniProtKB/TrEMBL;Acc:Q95YE8]	|
WBGene00023507	srz-26	|	101.876	|			|
WBGene00011681	T10B10.4	|	101.789	|			|
WBGene00003172	mec-8	|	101.725	|		Mec-8 protein [Source:UniProtKB/TrEMBL;Acc:G5ECJ4]	|
WBGene00020040	R12E2.15	|	101.536	|			|
WBGene00005561	sri-49	|	101.464	|			|
WBGene00020825	tmem-231	|	101.379	|		TMEM (Human TransMEMbrane protein) homolog [Source:UniProtKB/TrEMBL;Acc:Q22804]	|
WBGene00003724	nhr-134	|	101.372	|		Nuclear hormone receptor family member nhr-134 [Source:UniProtKB/Swiss-Prot;Acc:O16361]	|
WBGene00020322	T07F12.2	|	101.371	|			|
WBGene00017504	F16B4.2	|	101.321	|			|
WBGene00001423	fib-1	|	101.283	|		rRNA 2'-O-methyltransferase fibrillarin [Source:UniProtKB/Swiss-Prot;Acc:Q22053]	|
WBGene00003825	ntl-2	|	100.79	|		NOT-Like (Yeast CCR4/NOT complex component) [Source:UniProtKB/TrEMBL;Acc:B2MZA9]	|
WBGene00019142	btb-4	|	100.703	|		BTB (Broad/complex/Tramtrack/Bric a brac) domain protein [Source:UniProtKB/TrEMBL;Acc:Q9N5P7]	|
WBGene00013144	pno-1	|	100.642	|		RNA-binding protein pno-1 [Source:UniProtKB/Swiss-Prot;Acc:O18216]	|
WBGene00009920	abts-1	|	100.599	|	SLC transporter;SLC transporter: SLC4: Cl− HCO−	Anion exchange protein [Source:UniProtKB/TrEMBL;Acc:B3WFV9]	|
WBGene00018007	F33D11.10	|	100.558	|			|
WBGene00000514	ckb-4	|	100.373	|		Choline Kinase B [Source:UniProtKB/TrEMBL;Acc:Q9GZF3]	|
WBGene00005348	srh-131	|	100.279	|	Chemoreceptor;Chemoreceptor: Srh class	Serpentine Receptor, class H [Source:UniProtKB/TrEMBL;Acc:Q9XX66]	|
WBGene00004147	larp-5	|	100.153	|		LARP (RNA binding La related protein) homolog [Source:UniProtKB/TrEMBL;Acc:H2KZU0]	|
WBGene00003559	ncl-1	|	100.047	|		B-box type zinc finger protein ncl-1 [Source:UniProtKB/Swiss-Prot;Acc:P34611]	|
WBGene00001499	fsn-1	|	99.957	|		F-box/SPRY domain-containing protein 1 [Source:UniProtKB/Swiss-Prot;Acc:Q18223]	|
WBGene00017080	lec-12	|	99.921	|		Galectin [Source:UniProtKB/TrEMBL;Acc:A0A0K3AUS0]	|
WBGene00002344	let-70	|	99.916	|		Ubiquitin-conjugating enzyme E2 2 [Source:UniProtKB/Swiss-Prot;Acc:P35129]	|
WBGene00023463	srz-82	|	99.893	|	Chemoreceptor;Chemoreceptor: Srz class	Serpentine Receptor, class Z [Source:UniProtKB/TrEMBL;Acc:Q6A588]	|
WBGene00005300	srh-79	|	99.824	|	Chemoreceptor;Chemoreceptor: Srh class	Serpentine Receptor, class H [Source:UniProtKB/TrEMBL;Acc:O76661]	|
WBGene00013356	Y59A8B.24	|	99.612	|			|
WBGene00077437	Y59H11AR.6	|	99.537	|			|
WBGene00004887	smn-1	|	99.497	|		SMN (Human Survival Motor Neuron gene) homolog; Survival motor neuron protein [Source:UniProtKB/TrEMBL;Acc:G5EC16]	|
WBGene00005554	sri-42	|	99.429	|	Chemoreceptor;Chemoreceptor: Sri class	Serpentine Receptor, class I [Source:UniProtKB/TrEMBL;Acc:Q9TZE9]	|
WBGene00255375	F08B4.8	|	99.337	|			|
WBGene00016305	fbxc-57	|	99.229	|			|
WBGene00018776	F53H1.1	|	99.04	|			|
WBGene00044080	D1086.10	|	98.971	|			|
WBGene00007119	calf-1	|	98.939	|		CAlcium channel Localization Factor [Source:UniProtKB/TrEMBL;Acc:Q9XVF6]	|
WBGene00012290	W05H12.2	|	98.668	|			|
WBGene00003635	nhr-45	|	98.606	|		Nuclear Hormone Receptor family [Source:UniProtKB/TrEMBL;Acc:Q19496]	|
WBGene00010232	F58B3.6	|	98.581	|			|
WBGene00000206	asb-1	|	98.472	|		ATP Synthase B homolog [Source:UniProtKB/TrEMBL;Acc:Q20053]	|
WBGene00019006	spg-20	|	98.467	|		SPG (Spastic paraplegia) [Source:UniProtKB/TrEMBL;Acc:O44735]	|
WBGene00000379	cct-4	|	98.416	|		T-complex protein 1 subunit delta [Source:UniProtKB/Swiss-Prot;Acc:P47208]	|
WBGene00018698	vha-18	|	98.412	|		Probable V-type proton ATPase subunit H 1 [Source:UniProtKB/Swiss-Prot;Acc:Q20666]	|
WBGene00015750	C14A11.5	|	98.285	|			|
WBGene00001386	far-2	|	98.28	|		Fatty-acid and retinol-binding protein 2 [Source:UniProtKB/Swiss-Prot;Acc:P34383]	|
WBGene00006773	unc-37	|	98.271	|		Transcription factor unc-37 [Source:UniProtKB/Swiss-Prot;Acc:O02482]	|
WBGene00006818	unc-86	|	98.245	|		Transcription factor unc-86 [Source:UniProtKB/Swiss-Prot;Acc:P13528]	|
WBGene00008884	nhr-281	|	98.238	|		Nuclear Hormone Receptor family [Source:UniProtKB/TrEMBL;Acc:G5EE08]	|
WBGene00010617	K07A1.13	|	98.169	|			|
WBGene00009945	bath-38	|	98.098	|		BTB and MATH domain-containing protein 38 [Source:UniProtKB/Swiss-Prot;Acc:Q20681]	|
WBGene00003367	mix-1	|	98.089	|		Mitotic chromosome and X-chromosome-associated protein mix-1 [Source:UniProtKB/Swiss-Prot;Acc:Q09591]	|
WBGene00009558	F39B2.8	|	98.086	|			|
WBGene00001166	eftu-2	|	98.079	|		Elongation Factor TU family [Source:UniProtKB/TrEMBL;Acc:Q23463]	|
WBGene00022002	Y59E9AR.7	|	98.022	|		Major sperm protein [Source:UniProtKB/TrEMBL;Acc:G5EBJ8]	|
WBGene00045249	T07A9.15	|	97.977	|			|
WBGene00022793	ZK686.3	|	97.872	|		Probable dolichyl-diphosphooligosaccharide--protein glycosyltransferase subunit 3 [Source:UniProtKB/Swiss-Prot;Acc:P34669]	|
WBGene00022271	cpx-1	|	97.851	|	Synaptic release machinery;Synaptic release machinery: complexin	Putative complexin-1 [Source:UniProtKB/Swiss-Prot;Acc:Q9GUM7]	|
WBGene00012668	Y39B6A.5	|	97.832	|			|
WBGene00017961	nhr-180	|	97.606	|		Nuclear Hormone Receptor family [Source:UniProtKB/TrEMBL;Acc:O17131]	|
WBGene00018898	F55F10.1	|	97.563	|		Midasin [Source:UniProtKB/TrEMBL;Acc:O61851]	|
WBGene00014086	ZK809.3	|	97.415	|			|
WBGene00003460	msp-71	|	97.268	|			|
WBGene00012826	dyf-19	|	97.236	|			|
WBGene00007355	rpb-6	|	97.186	|		Probable DNA-directed RNA polymerases I, II, and III subunit RPABC2 [Source:UniProtKB/Swiss-Prot;Acc:Q17684]	|
WBGene00019396	K04F10.3	|	97.116	|		Endoplasmic reticulum-like protein [Source:UniProtKB/TrEMBL;Acc:O44769]	|
WBGene00045495	F11C1.7	|	96.916	|			|
WBGene00001152	ech-3	|	96.896	|		Enoyl-CoA Hydratase [Source:UniProtKB/TrEMBL;Acc:A0A131MCK1]	|
WBGene00000485	che-3	|	96.892	|	Dynein motors;Dynein motors: Heavy chain;Sensory cilia transport;Sensory cilia transport: IFT-Dynein	Cytoplasmic dynein 2 heavy chain 1 [Source:UniProtKB/Swiss-Prot;Acc:Q19542]	|
WBGene00022635	ZC581.9	|	96.838	|			|
WBGene00010879	M05D6.6	|	96.657	|			|
WBGene00014017	ZK632.10	|	96.626	|		UPF0057 membrane protein ZK632.10 [Source:UniProtKB/Swiss-Prot;Acc:P34655]	|
WBGene00004274	rab-11.1	|	96.474	|		Ras-related protein rab-11.1 [Source:UniProtKB/Swiss-Prot;Acc:O01803]	|
WBGene00017652	F21C10.1	|	96.378	|			|
WBGene00005539	sri-27	|	96.372	|	Chemoreceptor;Chemoreceptor: Sri class	Serpentine Receptor, class I [Source:UniProtKB/TrEMBL;Acc:O44574]	|
WBGene00011944	T23D8.3	|	96.326	|			|
WBGene00009885	F49E2.1	|	96.295	|		Molybdenum cofactor biosynthesis protein 1 GTP 3',8-cyclase Cyclic pyranopterin monophosphate synthase [Source:UniProtKB/Swiss-Prot;Acc:Q20624]	|
WBGene00002190	kin-2	|	96.192	|		cAMP-dependent protein kinase regulatory subunit [Source:UniProtKB/Swiss-Prot;Acc:P30625]	|
WBGene00000480	cgp-1	|	96.05	|		GTP-binding protein cgp-1 [Source:UniProtKB/Swiss-Prot;Acc:Q18905]	|
WBGene00012875	Y45F10B.13	|	95.841	|			|
WBGene00021722	srz-5	|	95.651	|	Chemoreceptor;Chemoreceptor: Srz class	Serpentine Receptor, class Z [Source:UniProtKB/TrEMBL;Acc:Q9N4T9]	|
WBGene00001329	epn-1	|	95.556	|		EPsiN (Endocytic protein) homolog [Source:UniProtKB/TrEMBL;Acc:Q9BI72]	|
WBGene00019554	K09C4.10	|	95.454	|			|
WBGene00021482	Y39H10A.6	|	95.436	|			|
WBGene00009161	cox-7C	|	95.43	|		Cytochrome OXidase assembly protein [Source:UniProtKB/TrEMBL;Acc:O18687]	|
WBGene00000601	col-12	|	95.418	|		Cuticle collagen 12 [Source:UniProtKB/Swiss-Prot;Acc:P20630]	|
WBGene00018972	srz-19	|	95.411	|	Chemoreceptor;Chemoreceptor: Srz class	Serpentine Receptor, class Z [Source:UniProtKB/TrEMBL;Acc:Q8ITX5]	|
WBGene00012140	T28F4.5	|	95.331	|			|
WBGene00015656	srz-70	|	95.23	|	Chemoreceptor;Chemoreceptor: Srz class	Serpentine Receptor, class Z [Source:UniProtKB/TrEMBL;Acc:Q688B9]	|
WBGene00014213	ZK1073.1	|	95.173	|			|
WBGene00001955	hlh-11	|	95.123	|		Helix-loop-helix protein 11 [Source:UniProtKB/Swiss-Prot;Acc:P34474]	|
WBGene00004913	snn-1	|	95.095	|	Synaptic release machinery;Synaptic release machinery: synapsin	Synapsin [Source:UniProtKB/TrEMBL;Acc:G5EGI2]	|
WBGene00007709	clec-87	|	95.023	|		C-type lectin domain-containing protein 87 [Source:UniProtKB/Swiss-Prot;Acc:Q9XVS3]	|
WBGene00194710	mks-2	|	94.975	|		MecKel-Gruber Syndrome (MKS) homolog [Source:UniProtKB/TrEMBL;Acc:C8JQP7]	|
WBGene00018200	btb-17	|	94.917	|		BTB (Broad/complex/Tramtrack/Bric a brac) domain protein [Source:UniProtKB/TrEMBL;Acc:Q8ITZ2]	|
WBGene00015203	cdk-11.1	|	94.892	|		Cyclin-dependent kinase 11.1 [Source:UniProtKB/Swiss-Prot;Acc:Q09437]	|
WBGene00003564	ncs-2	|	94.85	|	Calcium binding protein;Calcium binding protein: NCS family	Neuronal calcium sensor 2 [Source:UniProtKB/Swiss-Prot;Acc:P36609]	|
WBGene00017742	nfyc-1	|	94.804	|		Nuclear transcription factor Y subunit gamma [Source:UniProtKB/TrEMBL;Acc:A0A0K3AWV9]	|
WBGene00077728	T23G11.11	|	94.779	|			|
WBGene00004032	pkc-1	|	94.744	|		Protein kinase C-like 1B [Source:UniProtKB/Swiss-Prot;Acc:P34885]	|
WBGene00012100	sipa-1	|	94.739	|	PDZ domain protein	SIPA (Vertebrate Signal-Induced Proliferation-Associated) homolog [Source:UniProtKB/TrEMBL;Acc:G5EBQ9]	|
WBGene00001488	frm-1	|	94.666	|		FERM domain (Protein4.1-ezrin-radixin-moesin) family [Source:UniProtKB/TrEMBL;Acc:G5EFD6]	|
WBGene00016976	C56E10.3	|	94.66	|			|
WBGene00003178	mec-17	|	94.636	|		Alpha-tubulin N-acetyltransferase 1 [Source:UniProtKB/Swiss-Prot;Acc:O45100]	|
WBGene00001769	gst-21	|	94.528	|		Glutathione S-Transferase [Source:UniProtKB/TrEMBL;Acc:O44576]	|
WBGene00022647	ZK54.1	|	94.451	|	SLC transporter;SLC transporter: SLC17: Vesicular glutamate transporter family	SLC (SoLute Carrier) homolog [Source:UniProtKB/TrEMBL;Acc:Q23514]	|
WBGene00006631	tsp-5	|	94.429	|		Tetraspanin [Source:UniProtKB/TrEMBL;Acc:O62466]	|
WBGene00019389	irld-40	|	94.407	|	Insulin/EGF receptor-like;Insulin/EGF receptor-like: secreted	Insulin/EGF-Receptor L Domain protein [Source:UniProtKB/TrEMBL;Acc:Q9TXL4]	|
WBGene00015511	C06A6.7	|	94.331	|			|
WBGene00020719	natc-1	|	94.247	|		N-alpha-AcetylTransferase C complex subunit [Source:UniProtKB/TrEMBL;Acc:O17003]	|
WBGene00000182	arf-1.2	|	94.191	|		ADP-ribosylation factor 1-like 2 [Source:UniProtKB/Swiss-Prot;Acc:Q10943]	|
WBGene00018958	F56C11.6	|	94.185	|		Carboxylic ester hydrolase [Source:UniProtKB/TrEMBL;Acc:H2L069]	|
WBGene00005558	sri-46	|	94.148	|	Chemoreceptor;Chemoreceptor: Sri class	Serpentine Receptor, class I [Source:UniProtKB/TrEMBL;Acc:A0A0M7RDQ2]	|
WBGene00002182	kap-1	|	94.077	|	Sensory cilia transport;Sensory cilia transport: Kinesin-II	Kinesin associated protein kap-1; Kinesin-Associated Protein [Source:UniProtKB/TrEMBL;Acc:G5EEE6]	|
WBGene00008484	E04D5.5	|	94.028	|			|
WBGene00019494	K07E8.1	|	94.026	|			|
WBGene00014095	gdh-1	|	93.938	|		Glutamate dehydrogenase [Source:UniProtKB/TrEMBL;Acc:Q23621]	|
WBGene00003435	msp-40	|	93.872	|		Major sperm protein 19/31/40/45/50/51/53/59/61/65/81/113/142 [Source:UniProtKB/Swiss-Prot;Acc:P53017]	|
WBGene00012351	W09C5.1	|	93.861	|			|
WBGene00013378	emc-3	|	93.857	|		ER membrane protein complex subunit 3 [Source:UniProtKB/TrEMBL;Acc:Q9U1X6]	|
WBGene00008018	tbc-8	|	93.776	|		TBC (Tre-2/Bub2/Cdc16) domain family [Source:UniProtKB/TrEMBL;Acc:I2HAA0]	|
WBGene00004338	rfc-2	|	93.745	|		RFC (DNA replication factor) family [Source:UniProtKB/TrEMBL;Acc:O44175]	|
WBGene00004138	pqn-53	|	93.612	|		Prion-like-(Q/N-rich)-domain-bearing protein [Source:UniProtKB/TrEMBL;Acc:Q21793]	|
WBGene00018290	vps-60	|	93.554	|		Related to yeast Vacuolar Protein Sorting factor [Source:UniProtKB/TrEMBL;Acc:O16458]	|
WBGene00001561	gei-4	|	93.546	|		GEX Interacting protein [Source:UniProtKB/TrEMBL;Acc:Q65CL5]	|
WBGene00011735	hip-1	|	93.536	|		Hsp-70 Interacting Protein homolog [Source:UniProtKB/TrEMBL;Acc:G5EE04]	|
WBGene00000596	col-7	|	93.468	|		Cuticle collagen 7 [Source:UniProtKB/Swiss-Prot;Acc:P18832]	|
WBGene00003733	nhx-5	|	93.441	|		Sodium/hydrogen exchanger [Source:UniProtKB/TrEMBL;Acc:G5ECW8]	|
WBGene00022460	use-1	|	93.43	|	Synaptic release machinery;Synaptic release machinery: Q_SNARE:Qc subtype	Vesicle transport protein USE1 [Source:UniProtKB/Swiss-Prot;Acc:Q9N598]	|
WBGene00000741	col-168	|	93.384	|		COLlagen [Source:UniProtKB/TrEMBL;Acc:Q22380]	|
WBGene00020350	T08B2.12	|	93.299	|			|
WBGene00006465	fntb-1	|	93.092	|		Protein farnesyltransferase subunit beta [Source:UniProtKB/TrEMBL;Acc:Q19752]	|
WBGene00006162	str-111	|	93.069	|		Seven TM Receptor [Source:UniProtKB/TrEMBL;Acc:O62148]	|
WBGene00018156	ncbp-1	|	93.064	|		Nuclear cap-binding protein subunit 1 [Source:UniProtKB/Swiss-Prot;Acc:O01763]	|
WBGene00015387	kcnl-3	|	92.874	|	Potassium Channel;Potassium Channel: Calcium-activated SK family	Small conductance calcium-activated potassium channel-like protein 3 [Source:UniProtKB/Swiss-Prot;Acc:Q11122]	|
WBGene00014090	ZK822.2	|	92.869	|			|
WBGene00005333	srh-114	|	92.851	|			|
WBGene00019821	gtf-2H1	|	92.832	|		General Transcription Factor homolog [Source:UniProtKB/TrEMBL;Acc:O44499]	|
WBGene00001694	grd-5	|	92.738	|		GRounDhog (Hedgehog-like family) [Source:UniProtKB/TrEMBL;Acc:O16462]	|
WBGene00015947	C18A11.1	|	92.669	|			|
WBGene00000718	col-145	|	92.627	|		Putative cuticle collagen 145 [Source:UniProtKB/Swiss-Prot;Acc:Q17459]	|
WBGene00012044	T26E4.2	|	92.615	|			|
WBGene00000603	col-14	|	92.561	|		Cuticle collagen 14 [Source:UniProtKB/Swiss-Prot;Acc:P18834]	|
WBGene00022069	eel-1	|	92.535	|		Enhancer of EfL-1 mutant phenotype [Source:UniProtKB/TrEMBL;Acc:U4PBK1]	|
WBGene00011481	imp-2	|	92.52	|		Intramembrane protease 2 [Source:UniProtKB/Swiss-Prot;Acc:P49049]	|
WBGene00001034	dnj-16	|	92.372	|		DNaJ domain (Prokaryotic heat shock protein) [Source:UniProtKB/TrEMBL;Acc:Q22028]	|
WBGene00022536	ZC178.2	|	92.358	|		LOW QUALITY PROTEIN: Uncharacterized protein CELE_ZC178.2 [Source:RefSeq peptide;Acc:NP_001337278]	|
WBGene00010823	M01G12.10	|	92.328	|			|
WBGene00012660	Y39A1A.24	|	92.289	|			|
WBGene00000482	chd-3	|	92.278	|		Chromodomain-helicase-DNA-binding protein 3 homolog [Source:UniProtKB/Swiss-Prot;Acc:Q22516]	|
WBGene00022738	fubl-2	|	92.274	|		FUBp (FUBP) Like [Source:UniProtKB/TrEMBL;Acc:Q23487]	|
WBGene00011121	R07E5.17	|	92.218	|			|
WBGene00010012	saeg-1	|	92.145	|		Suppressor of activated egl-4 protein 1 [Source:UniProtKB/Swiss-Prot;Acc:Q20733]	|
WBGene00003648	nhr-58	|	92.111	|		Nuclear Hormone Receptor family [Source:UniProtKB/TrEMBL;Acc:O16960]	|
WBGene00004271	rab-7	|	92.027	|		RAB family [Source:UniProtKB/TrEMBL;Acc:Q23146]	|
WBGene00019162	eif-1.A	|	91.955	|		Eukaryotic Initiation Factor [Source:UniProtKB/TrEMBL;Acc:Q9TXU7]	|
WBGene00014079	ZK792.7	|	91.955	|			|
WBGene00005394	srh-179	|	91.921	|	Chemoreceptor;Chemoreceptor: Srh class	Serpentine Receptor, class H [Source:UniProtKB/TrEMBL;Acc:O46012]	|
WBGene00020317	pdf-1	|	91.902	|	Neuropeptide;Neuropeptide: Neuropeptide-like proteins	PDF (Arthropod Pigment Dispersing Factor) homolog [Source:UniProtKB/TrEMBL;Acc:G8JYC6]	|
WBGene00021844	sec-11	|	91.892	|		Signal peptidase complex catalytic subunit SEC11 [Source:UniProtKB/TrEMBL;Acc:Q9N3D0]	|
WBGene00009814	F47B10.3	|	91.891	|			|
WBGene00002001	hars-1	|	91.739	|		Histidine--tRNA ligase [Source:UniProtKB/Swiss-Prot;Acc:P34183]	|
WBGene00012094	T27E9.2	|	91.738	|		Cytochrome b-c1 complex subunit 6 [Source:UniProtKB/TrEMBL;Acc:O45864]	|
WBGene00011471	T05C12.8	|	91.709	|			|
WBGene00011867	chc-1	|	91.701	|		Probable clathrin heavy chain 1 [Source:UniProtKB/Swiss-Prot;Acc:P34574]	|
WBGene00001081	dpy-22	|	91.657	|		Mediator of RNA polymerase II transcription subunit 12 [Source:UniProtKB/Swiss-Prot;Acc:Q20497]	|
WBGene00005368	srh-152	|	91.488	|			|
WBGene00000094	agt-2	|	91.483	|		AlkylGuanine DNA alkylTransferase [Source:UniProtKB/TrEMBL;Acc:Q19263]	|
WBGene00003090	lys-1	|	91.336	|		Lysozyme-like protein 1 [Source:UniProtKB/Swiss-Prot;Acc:O62415]	|
WBGene00010958	ndfl-4	|	91.333	|			|
WBGene00004109	stam-1	|	91.311	|		Signal transducing adapter molecule 1 [Source:UniProtKB/Swiss-Prot;Acc:O01498]	|
WBGene00021205	Y17G9B.8	|	91.172	|			|
WBGene00022495	fbxa-78	|	91.125	|		F-box A protein [Source:UniProtKB/TrEMBL;Acc:G5EDF8]	|
WBGene00044679	K02B12.9	|	91.081	|			|
WBGene00018963	ucr-1	|	91.077	|		Cytochrome b-c1 complex subunit 1, mitochondrial [Source:UniProtKB/Swiss-Prot;Acc:P98080]	|
WBGene00017705	F22E5.6	|	91.069	|			|
WBGene00018837	F54G2.1	|	90.964	|			|
WBGene00008265	kcnl-4	|	90.837	|	Potassium Channel;Potassium Channel: Calcium-activated SK family	KCNN (Potassium K ChaNNel, calcium activated)-Like [Source:UniProtKB/TrEMBL;Acc:D5MCU0]	|
WBGene00001787	gst-39	|	90.675	|		Glutathione S-Transferase [Source:UniProtKB/TrEMBL;Acc:Q9NAB0]	|
WBGene00022804	ZK697.1	|	90.656	|			|
WBGene00219421	Y66D12A.30	|	90.638	|			|
WBGene00019980	chil-14	|	90.616	|		CHItinase-Like [Source:UniProtKB/TrEMBL;Acc:A0A0K3AV31]	|
WBGene00013639	Y105C5A.15	|	90.568	|			|
WBGene00018855	F55A4.3	|	90.465	|			|
WBGene00013436	Y66D12A.10	|	90.33	|			|
WBGene00017350	F10E7.9	|	90.324	|	SLC transporter;SLC transporter: SLC12: cation-chloride cotransporter family		|
WBGene00018305	exos-8	|	90.286	|		EXOSome (Multiexonuclease complex) component [Source:UniProtKB/TrEMBL;Acc:Q95QG7]	|
WBGene00000479	cgh-1	|	90.237	|		ATP-dependent RNA helicase cgh-1 [Source:UniProtKB/Swiss-Prot;Acc:Q95YF3]	|
WBGene00019051	srz-23	|	90.231	|	Chemoreceptor;Chemoreceptor: Srz class	Serpentine Receptor, class Z [Source:UniProtKB/TrEMBL;Acc:Q9TZ00]	|
WBGene00015143	rbm-26	|	90.013	|		RNA Binding Motif protein homolog [Source:UniProtKB/TrEMBL;Acc:A0A2K5ATS7]	|
WBGene00004506	rpt-6	|	89.991	|		Proteasome Regulatory Particle, ATPase-like [Source:UniProtKB/TrEMBL;Acc:Q9XTT9]	|
WBGene00020420	T10E10.3	|	89.751	|	Neuropeptide receptors;Neuropeptide receptors: Related family with no specific orthologs 1		|
WBGene00010130	vha-14	|	89.722	|		V-type proton ATPase subunit D [Source:UniProtKB/Swiss-Prot;Acc:P34462]	|
WBGene00000638	col-62	|	89.663	|		COLlagen [Source:UniProtKB/TrEMBL;Acc:Q93207]	|
WBGene00011510	pdha-1	|	89.468	|		Probable pyruvate dehydrogenase E1 component subunit alpha, mitochondrial [Source:UniProtKB/Swiss-Prot;Acc:P52899]	|
WBGene00014031	ZK637.14	|	89.443	|		Uncharacterized RING finger protein ZK637.14 [Source:UniProtKB/Swiss-Prot;Acc:P30631]	|
WBGene00019994	cdh-1	|	89.346	|	Cadherin	CaDHerin family [Source:UniProtKB/TrEMBL;Acc:Q5F4W0]	|
WBGene00017852	F27C1.2	|	89.343	|			|
WBGene00000192	arl-8	|	89.254	|		ARF-Like; Novel small G protein indispensable for equal chromosome segregation [Source:UniProtKB/TrEMBL;Acc:G5EDC6]	|
WBGene00007877	nfki-1	|	89.234	|		ANK repeat-containing protein nipk-1 [Source:UniProtKB/Swiss-Prot;Acc:G5EDE9]	|
WBGene00004347	rgs-4	|	89.077	|	GPCR signalling;GPCR signalling: RGS family	Regulator of G protein Signaling [Source:UniProtKB/TrEMBL;Acc:H2KMK7]	|
WBGene00004679	rars-1	|	89.041	|		Probable arginine--tRNA ligase, cytoplasmic [Source:UniProtKB/Swiss-Prot;Acc:Q19825]	|
WBGene00021149	dnc-3	|	89.04	|		DyNactin Complex component [Source:UniProtKB/TrEMBL;Acc:Q965K5]	|
WBGene00008765	ttx-7	|	89.033	|		Inositol monophosphatase ttx-7 [Source:UniProtKB/Swiss-Prot;Acc:Q19420]	|
WBGene00001173	egl-4	|	88.894	|		cGMP-dependent protein kinase egl-4 [Source:UniProtKB/Swiss-Prot;Acc:O76360]	|
WBGene00020950	dlst-1	|	88.827	|		DihydroLipoamide S-SuccinylTransferase [Source:UniProtKB/TrEMBL;Acc:O45148]	|
WBGene00010647	K08C7.4	|	88.793	|			|
WBGene00189933	F38B7.11	|	88.647	|			|
WBGene00008198	C49C3.8	|	88.587	|			|
WBGene00001158	ech-9	|	88.451	|		Enoyl-CoA Hydratase [Source:UniProtKB/TrEMBL;Acc:A0A061AKU6]	|
WBGene00017467	F14F9.4	|	88.45	|			|
WBGene00006807	unc-75	|	88.436	|		Putative RNA-binding protein [Source:UniProtKB/TrEMBL;Acc:G5EE68]	|
WBGene00023475	srz-69	|	88.337	|	Chemoreceptor;Chemoreceptor: Srz class	Serpentine Receptor, class Z [Source:UniProtKB/TrEMBL;Acc:U3UB87]	|
WBGene00022675	gbb-2	|	88.327	|	Metabotropic neurotransmitter receptor;Metabotropic neurotransmitter receptor: Ligand:GABA;Metabotropic neurotransmitter receptor: metabotropic GABA receptors	Gamma-aminobutyric acid type B receptor subunit 2 [Source:UniProtKB/Swiss-Prot;Acc:G5ECB2]	|
WBGene00043052	srz-104	|	88.304	|	Chemoreceptor;Chemoreceptor: Srz class	Serpentine Receptor, class Z [Source:UniProtKB/TrEMBL;Acc:Q5WRL6]	|
WBGene00011418	igdb-1	|	88.222	|	Extracellular Immunoglobulin;Extracellular Immunoglobulin: Ig domain proteins	Ig-like and fibronectin type-III domain-containing protein 1 [Source:UniProtKB/Swiss-Prot;Acc:O18016]	|
WBGene00018218	F40A3.3	|	88.088	|		Phosphatidylethanolamine-binding protein homolog F40A3.3 [Source:UniProtKB/Swiss-Prot;Acc:O16264]	|
WBGene00021548	trx-4	|	87.894	|		Thioredoxin [Source:UniProtKB/TrEMBL;Acc:Q9TXY8]	|
WBGene00010677	gtbp-1	|	87.874	|		Ras-Gtpase-activating protein SH3 (Three) domain-Binding Protein [Source:UniProtKB/TrEMBL;Acc:Q21351]	|
WBGene00015636	C09D4.6	|	87.841	|			|
WBGene00018265	nhr-182	|	87.824	|		Nuclear Hormone Receptor family [Source:UniProtKB/TrEMBL;Acc:O16676]	|
WBGene00001663	gpa-1	|	87.653	|	GPCR signalling;GPCR signalling: Gα	Guanine nucleotide-binding protein alpha-1 subunit [Source:UniProtKB/Swiss-Prot;Acc:P28051]	|
WBGene00012286	sre-35	|	87.591	|	Chemoreceptor;Chemoreceptor: Sre class	Serpentine Receptor, class E (Epsilon) [Source:UniProtKB/TrEMBL;Acc:Q5FC42]	|
WBGene00009583	aagr-3	|	87.563	|		Acid Alpha Glucosidase Relate [Source:UniProtKB/TrEMBL;Acc:J7SA48]	|
WBGene00012287	sre-33	|	87.523	|	Chemoreceptor;Chemoreceptor: Sre class	Serpentine receptor class epsilon-33 [Source:UniProtKB/Swiss-Prot;Acc:O18175]	|
WBGene00017834	F26F12.3	|	87.496	|			|
WBGene00010626	K07C5.3	|	87.462	|			|
WBGene00010221	F57G12.1	|	87.462	|			|
WBGene00003470	msp-152	|	87.443	|		Major sperm protein 152 [Source:UniProtKB/Swiss-Prot;Acc:Q23519]	|
WBGene00007016	mdt-15	|	87.417	|		Mediator of RNA polymerase II transcription subunit 15 [Source:UniProtKB/Swiss-Prot;Acc:Q21955]	|
WBGene00015481	C05D11.1	|	87.265	|			|
WBGene00013677	yars-1	|	87.168	|		Tyrosine--tRNA ligase [Source:UniProtKB/TrEMBL;Acc:G5ED95]	|
WBGene00016638	perm-4	|	87.095	|		PERMeable eggshell [Source:UniProtKB/TrEMBL;Acc:O44144]	|
WBGene00045488	F57B1.9	|	87.088	|			|
WBGene00001747	gsp-1	|	86.954	|		Serine/threonine-protein phosphatase PP1-alpha [Source:UniProtKB/Swiss-Prot;Acc:Q27497]	|
WBGene00016062	cox-16	|	86.928	|		Probable peptidyl-tRNA hydrolase 2 [Source:UniProtKB/Swiss-Prot;Acc:O76387]	|
WBGene00005572	sri-60	|	86.912	|	Chemoreceptor;Chemoreceptor: Sri class	Serpentine Receptor, class I [Source:UniProtKB/TrEMBL;Acc:Q965H1]	|
WBGene00019488	K07D4.9	|	86.837	|			|
WBGene00008040	ttr-5	|	86.822	|		Transthyretin-like protein 5 [Source:UniProtKB/Swiss-Prot;Acc:Q03575]	|
WBGene00017768	F25B4.5	|	86.76	|			|
WBGene00003690	nhr-100	|	86.713	|		Nuclear hormone receptor family member nhr-100 [Source:UniProtKB/Swiss-Prot;Acc:O17611]	|
WBGene00022060	dmd-9	|	86.699	|		DM (Doublesex/MAB-3) Domain family [Source:UniProtKB/TrEMBL;Acc:Q95XU1]	|
WBGene00009975	F53C11.5	|	86.693	|			|
WBGene00018017	golg-2	|	86.689	|		GOLGi associated coiled-coil protein homolog [Source:UniProtKB/TrEMBL;Acc:Q19989]	|
WBGene00017735	did-2	|	86.682	|		Doa4-Independent Degradation, homologous to yeast Did2 [Source:UniProtKB/TrEMBL;Acc:Q9TXI3]	|
WBGene00010699	trpp-6	|	86.655	|		TRansport Protein Particle [Source:UniProtKB/TrEMBL;Acc:Q9XU81]	|
WBGene00013219	Y54G11A.11	|	86.646	|		Transcription elongation factor 1 homolog [Source:UniProtKB/Swiss-Prot;Acc:Q9XVZ8]	|
WBGene00007490	mks-5	|	86.516	|			|
WBGene00011498	T05G5.1	|	86.509	|			|
WBGene00001803	lite-1	|	86.488	|		High-energy light unresponsive protein 1 [Source:UniProtKB/Swiss-Prot;Acc:Q17990]	|
WBGene00000647	col-71	|	86.373	|		COLlagen [Source:UniProtKB/TrEMBL;Acc:Q9N4U2]	|
WBGene00000207	asb-2	|	86.368	|		ATP Synthase B homolog [Source:UniProtKB/TrEMBL;Acc:Q19126]	|
WBGene00020496	spat-3	|	86.364	|		Suppressor of PAr-Two defect [Source:UniProtKB/TrEMBL;Acc:Q22463]	|
WBGene00005316	srh-97	|	86.361	|	Chemoreceptor;Chemoreceptor: Srh class	Serpentine Receptor, class H [Source:UniProtKB/TrEMBL;Acc:Q9XV05]	|
WBGene00006805	unc-73	|	86.318	|		Guanine nucleotide exchange factor UNC-73B [Source:UniProtKB/TrEMBL;Acc:Q7KPP4]	|
WBGene00022380	Y94H6A.8	|	86.301	|		Probable NADH dehydrogenase [ubiquinone] 1 alpha subcomplex subunit 12 [Source:UniProtKB/Swiss-Prot;Acc:Q9N2W7]	|
WBGene00019333	moma-1	|	86.249	|		MICOS complex subunit MIC27 [Source:UniProtKB/Swiss-Prot;Acc:Q21154]	|
WBGene00000366	cbp-1	|	86.18	|			|
WBGene00021466	eif-2gamma	|	86.083	|		Eukaryotic Initiation Factor [Source:UniProtKB/TrEMBL;Acc:Q95XR0]	|
WBGene00018811	pmt-2	|	86.027	|	Neurotransmitter's metabolism;Neurotransmitter's metabolism: ACh synthesis	Phosphoethanolamine MethylTransferase [Source:UniProtKB/TrEMBL;Acc:Q22993]	|
WBGene00016292	tbc-7	|	86.014	|		TBC (Tre-2/Bub2/Cdc16) domain family [Source:UniProtKB/TrEMBL;Acc:Q8MQB0]	|
WBGene00002250	lap-2	|	85.971	|		Putative aminopeptidase W07G4.4 [Source:UniProtKB/Swiss-Prot;Acc:Q27245]	|
WBGene00008446	E01G4.3	|	85.895	|			|
WBGene00001241	elo-3	|	85.859	|		Putative fatty acid elongation protein 3 [Source:UniProtKB/Swiss-Prot;Acc:P49191]	|
WBGene00013597	gpi-1	|	85.819	|		Glucose-6-phosphate isomerase [Source:UniProtKB/TrEMBL;Acc:Q9U1Q2]	|
WBGene00011198	R10E4.1	|	85.799	|			|
WBGene00000235	baf-1	|	85.687	|		Barrier-to-autointegration factor 1 [Source:UniProtKB/Swiss-Prot;Acc:Q03565]	|
WBGene00005360	srh-144	|	85.676	|			|
WBGene00019098	F59B1.4	|	85.6	|			|
WBGene00004465	rpn-9	|	85.588	|		Proteasome Regulatory Particle, Non-ATPase-like [Source:UniProtKB/TrEMBL;Acc:Q22253]	|
WBGene00219372	F01E11.17	|	85.527	|			|
WBGene00012973	spat-2	|	85.525	|		Suppressor of PAr-Two defect [Source:UniProtKB/TrEMBL;Acc:Q9XXC7]	|
WBGene00045401	eol-1	|	85.454	|		Enhanced Olfactory Learning [Source:UniProtKB/TrEMBL;Acc:A5JYX9]	|
WBGene00044202	K10G4.10	|	85.371	|			|
WBGene00003003	lin-14	|	85.217	|			|
WBGene00020589	T19H12.3	|	85.111	|			|
WBGene00003085	ccar-1	|	85.092	|		CCAR1 homolog [Source:UniProtKB/TrEMBL;Acc:H2KMJ3]	|
WBGene00006801	unc-68	|	84.932	|			|
WBGene00002162	isp-1	|	84.7	|		Cytochrome b-c1 complex subunit Rieske, mitochondrial [Source:UniProtKB/TrEMBL;Acc:O44512]	|
WBGene00005469	srh-263	|	84.638	|			|
WBGene00011712	T11F9.10	|	84.579	|			|
WBGene00015167	B0403.3	|	84.547	|			|
WBGene00006739	ulp-4	|	84.522	|		Ubiquitin-like protease 4 [Source:UniProtKB/Swiss-Prot;Acc:Q09275]	|
WBGene00018081	F36A4.2	|	84.489	|			|
WBGene00016093	srsx-34	|	84.432	|	Chemoreceptor;Chemoreceptor: Srsx class	Serpentine Receptor, class SX [Source:UniProtKB/TrEMBL;Acc:H2KZ10]	|
WBGene00019099	F59B1.6	|	84.427	|			|
WBGene00005338	srh-119	|	84.416	|	Chemoreceptor;Chemoreceptor: Srh class	Serpentine Receptor, class H [Source:UniProtKB/TrEMBL;Acc:Q9XX73]	|
WBGene00003452	msp-59	|	84.144	|		Major sperm protein 19/31/40/45/50/51/53/59/61/65/81/113/142 [Source:UniProtKB/Swiss-Prot;Acc:P53017]	|
WBGene00002717	let-526	|	84.133	|			|
WBGene00007193	B0491.6	|	84.126	|			|
WBGene00021562	nuo-5	|	84.05	|		NADH Ubiquinone Oxidoreductase [Source:UniProtKB/TrEMBL;Acc:Q9N4Y8]	|
WBGene00284844	H38K22.9	|	83.98	|			|
WBGene00005410	srh-199	|	83.961	|	Chemoreceptor;Chemoreceptor: Srh class	Serpentine Receptor, class H [Source:UniProtKB/TrEMBL;Acc:O44579]	|
WBGene00000545	clp-4	|	83.868	|		CaLPain family [Source:UniProtKB/TrEMBL;Acc:Q8IAA9]	|
WBGene00000293	cap-2	|	83.857	|		F-actin-capping protein subunit beta [Source:UniProtKB/Swiss-Prot;Acc:P34686]	|
WBGene00004143	pqn-59	|	83.848	|		Prion-like-(Q/N-rich)-domain-bearing protein [Source:UniProtKB/TrEMBL;Acc:O61708]	|
WBGene00018117	nlp-47	|	83.831	|	Neuropeptide;Neuropeptide: Neuropeptide-like proteins	Neuropeptide-Like Protein [Source:UniProtKB/TrEMBL;Acc:O76722]	|
WBGene00000409	cdk-8	|	83.651	|		Cyclin-dependent kinase 8 [Source:UniProtKB/Swiss-Prot;Acc:P90866]	|
WBGene00009440	idhg-1	|	83.635	|		Isocitrate dehydrogenase [NAD] subunit, mitochondrial [Source:UniProtKB/TrEMBL;Acc:Q20049]	|
WBGene00008149	pyp-1	|	83.399	|		Inorganic pyrophosphatase 1 [Source:UniProtKB/Swiss-Prot;Acc:Q18680]	|
WBGene00017926	cox-6C	|	83.283	|		Cytochrome OXidase assembly protein [Source:UniProtKB/TrEMBL;Acc:O76367]	|
WBGene00017120	tctn-1	|	83.265	|		TeCToNic (Vertebrate ciliogenesis factor) homolog [Source:UniProtKB/TrEMBL;Acc:O44478]	|
WBGene00008504	F01G4.5	|	83.186	|			|
WBGene00189948	F56H9.8	|	83.125	|			|
WBGene00010616	K07A1.10	|	83.123	|			|
WBGene00005400	srh-185	|	83.117	|	Chemoreceptor;Chemoreceptor: Srh class	Serpentine Receptor, class H [Source:UniProtKB/TrEMBL;Acc:O16472]	|
WBGene00005387	srh-171	|	83.093	|	Chemoreceptor;Chemoreceptor: Srh class	Serpentine Receptor, class H [Source:UniProtKB/TrEMBL;Acc:Q9U1Z9]	|
WBGene00000700	col-126	|	83.06	|		COLlagen [Source:UniProtKB/TrEMBL;Acc:G5EFU8]	|
WBGene00016301	fbxc-6	|	82.905	|			|
WBGene00021346	Y37E3.1	|	82.9	|			|
WBGene00012989	Y48C3A.5	|	82.838	|			|
WBGene00007405	C07A9.9	|	82.783	|			|
WBGene00017380	F11D5.1	|	82.766	|			|
WBGene00000641	col-65	|	82.708	|		COLlagen [Source:UniProtKB/TrEMBL;Acc:Q9XUT4]	|
WBGene00008256	glb-12	|	82.616	|	Gas receptors;Gas receptors: Globin	GLoBin related [Source:UniProtKB/TrEMBL;Acc:Q09514]	|
WBGene00003646	nhr-56	|	82.573	|		Nuclear Hormone Receptor family [Source:UniProtKB/TrEMBL;Acc:H2L018]	|
WBGene00012125	T28D6.5	|	82.502	|			|
WBGene00006823	unc-94	|	82.481	|		Tropomodulin [Source:UniProtKB/Swiss-Prot;Acc:O01479]	|
WBGene00003765	nlp-27	|	82.396	|	Neuropeptide;Neuropeptide: Neuropeptide-like proteins	Neuropeptide-Like Protein [Source:UniProtKB/TrEMBL;Acc:O44666]	|
WBGene00016943	acdh-1	|	82.387	|		Acyl CoA DeHydrogenase [Source:UniProtKB/TrEMBL;Acc:Q8IAB6]	|
WBGene00000912	daf-16	|	82.358	|		Forkhead box protein O [Source:UniProtKB/Swiss-Prot;Acc:O16850]	|
WBGene00003640	nhr-50	|	82.028	|		Nuclear Hormone Receptor family [Source:UniProtKB/TrEMBL;Acc:O62031]	|
WBGene00021370	nape-2	|	82.011	|		N-Acyl Phosphatidyl Ethanolamine specific phospholipase D (NAPE-PLD) homolog [Source:UniProtKB/TrEMBL;Acc:Q8MXT4]	|
WBGene00021938	Y55F3BR.1	|	81.826	|			|
WBGene00004896	smu-2	|	81.803	|		Smu-2 suppressor of mec-8 and unc-52 protein [Source:UniProtKB/Swiss-Prot;Acc:Q9N4U5]	|
WBGene00003914	pam-1	|	81.757	|		Puromycin-sensitive aminopeptidase [Source:UniProtKB/Swiss-Prot;Acc:Q4TT88]	|
WBGene00012004	dyrb-1	|	81.746	|	Dynein motors;Dynein motors: Light chain (Roadblock-type)	Dynein light chain roadblock [Source:UniProtKB/TrEMBL;Acc:Q22752]	|
WBGene00005648	srp-7	|	81.703	|		SeRPin; Serine or cysteine protease inhibitor [Source:UniProtKB/TrEMBL;Acc:Q6QUQ6]	|
WBGene00004336	ret-1	|	81.65	|		Reticulon-like protein [Source:UniProtKB/TrEMBL;Acc:G5ECZ2]	|
WBGene00000793	crh-1	|	81.633	|		CREB Homolog; Cyclic AMP-response element binding protein 1 beta [Source:UniProtKB/TrEMBL;Acc:G5ECG1]	|
WBGene00007009	wwp-1	|	81.566	|		E3 ubiquitin-protein ligase [Source:UniProtKB/TrEMBL;Acc:V6CJJ8]	|
WBGene00002215	klc-2	|	81.537	|		Kinesin light chain [Source:UniProtKB/Swiss-Prot;Acc:P46822]	|
WBGene00016643	vps-45	|	81.514	|		Related to yeast Vacuolar Protein Sorting factor [Source:UniProtKB/TrEMBL;Acc:H2KYN0]	|
WBGene00011145	R08D7.5	|	81.508	|	Calcium binding protein;Calcium binding protein: Others	Uncharacterized calcium-binding protein R08D7.5 [Source:UniProtKB/Swiss-Prot;Acc:P30644]	|
WBGene00005445	srh-238	|	81.38	|			|
WBGene00003053	lmp-1	|	81.33	|		LAMP family protein lmp-1 [Source:UniProtKB/Swiss-Prot;Acc:Q11117]	|
WBGene00021510	frpr-19	|	81.318	|	Neuropeptide receptors;Neuropeptide receptors: Drosophila FMRFamide receptor family	FMRFamide Peptide Receptor family [Source:UniProtKB/TrEMBL;Acc:U4PC84]	|
WBGene00003728	nhr-138	|	81.085	|		Nuclear Hormone Receptor family [Source:UniProtKB/TrEMBL;Acc:Q95QT4]	|
WBGene00045366	Y17D7C.3	|	81.073	|			|
WBGene00000639	col-63	|	80.999	|		COLlagen [Source:UniProtKB/TrEMBL;Acc:Q94399]	|
WBGene00008404	D2013.6	|	80.988	|			|
WBGene00000677	col-103	|	80.854	|		COLlagen [Source:UniProtKB/TrEMBL;Acc:O45114]	|
WBGene00015298	C01F1.3	|	80.785	|			|
WBGene00000183	arf-3	|	80.781	|		ADP-Ribosylation Factor related; ADP-ribosylation factor related (20.5 kD) (Arf-3) [Source:UniProtKB/TrEMBL;Acc:G5EFK4]	|
WBGene00003429	msp-31	|	80.778	|		Major sperm protein 19/31/40/45/50/51/53/59/61/65/81/113/142 [Source:UniProtKB/Swiss-Prot;Acc:P53017]	|
WBGene00010610	K07A1.3	|	80.605	|			|
WBGene00020840	spch-3	|	80.584	|		SPerm CHromatin enriched [Source:UniProtKB/TrEMBL;Acc:P91497]	|
WBGene00012825	Y43F8C.3	|	80.518	|			|
WBGene00007111	sart-3	|	80.452	|		SART-3/p110 homolog [Source:UniProtKB/TrEMBL;Acc:Q17430]	|
WBGene00302968	Y62E10A.24	|	80.432	|		Ribonuclease P protein subunit p20 [Source:UniProtKB/TrEMBL;Acc:Q9U1X8]	|
WBGene00001005	dlc-1	|	80.329	|	Dynein motors;Dynein motors: Light chain (LC8-type)	Dynein light chain 1, cytoplasmic [Source:UniProtKB/Swiss-Prot;Acc:Q22799]	|
WBGene00007969	acs-19	|	80.255	|		Acetyl-coenzyme A synthetase [Source:UniProtKB/TrEMBL;Acc:Q65ZB8]	|
WBGene00009451	cids-2	|	80.233	|		Pol II C-terminal Interaction Domain Suppressor [Source:UniProtKB/TrEMBL;Acc:Q8I4J5]	|
WBGene00006021	srx-130	|	80.08	|	Chemoreceptor;Chemoreceptor: Srx class	Serpentine Receptor, class X [Source:UniProtKB/TrEMBL;Acc:A9QY31]	|
WBGene00004392	rnr-2	|	80.005	|		Ribonucleoside-diphosphate reductase small chain [Source:UniProtKB/Swiss-Prot;Acc:P42170]	|
WBGene00206380	C42D4.18	|	79.839	|			|
WBGene00016260	rege-1	|	79.757	|		Endoribonuclease rege-1 [Source:UniProtKB/Swiss-Prot;Acc:Q95YE2]	|
WBGene00005570	sri-58	|	79.75	|			|
WBGene00010666	K08E4.2	|	79.698	|			|
WBGene00000225	atgp-2	|	79.621	|		Amino acid Transporter GlycoProtein subunit [Source:UniProtKB/TrEMBL;Acc:G1K110]	|
WBGene00016140	rpb-2	|	79.565	|		DNA-directed RNA polymerase II subunit RPB2 [Source:UniProtKB/Swiss-Prot;Acc:Q10578]	|
WBGene00015527	C06E2.1	|	79.527	|			|
WBGene00000542	clp-1	|	79.404	|		Calpain clp-1 [Source:UniProtKB/Swiss-Prot;Acc:P34308]	|
WBGene00001058	dpf-5	|	79.239	|	Auxiliary subunit for:: Voltage-gated K channels;Neuropeptide processing;Neuropeptide processing: Degradation	Dipeptidyl Peptidase Four (IV) family [Source:UniProtKB/TrEMBL;Acc:Q9TYX1]	|
WBGene00005163	srg-5	|	79.206	|	Chemoreceptor;Chemoreceptor: Srg class	Serpentine receptor class gamma-5 [Source:UniProtKB/Swiss-Prot;Acc:P54127]	|
WBGene00004831	slo-2	|	79.15	|	Potassium Channel;Potassium Channel: Calcium-activated Slo family	SLOwpoke potassium channel family [Source:UniProtKB/TrEMBL;Acc:Q565B7]	|
WBGene00003130	map-2	|	79.091	|		Methionine aminopeptidase 2 [Source:UniProtKB/TrEMBL;Acc:H1UBK1]	|
WBGene00005536	sri-24	|	79.053	|	Chemoreceptor;Chemoreceptor: Sri class	Serpentine Receptor, class I [Source:UniProtKB/TrEMBL;Acc:O17663]	|
WBGene00045399	Y47G6A.33	|	79.003	|			|
WBGene00045502	F49H6.14	|	78.945	|			|
WBGene00003815	nars-1	|	78.943	|		Asparagine--tRNA ligase, cytoplasmic [Source:UniProtKB/Swiss-Prot;Acc:Q19722]	|
WBGene00005414	srh-203	|	78.913	|	Chemoreceptor;Chemoreceptor: Srh class	Serpentine Receptor, class H [Source:UniProtKB/TrEMBL;Acc:Q9XV78]	|
WBGene00003431	msp-33	|	78.876	|		Major sperm protein 33 [Source:UniProtKB/Swiss-Prot;Acc:P53019]	|
WBGene00077536	F38B7.10	|	78.852	|			|
WBGene00000787	cps-6	|	78.838	|		Endonuclease G, mitochondrial [Source:UniProtKB/Swiss-Prot;Acc:Q95NM6]	|
WBGene00015900	nhr-157	|	78.838	|		Nuclear Hormone Receptor family [Source:UniProtKB/TrEMBL;Acc:O16388]	|
WBGene00008430	hgap-2	|	78.778	|		Heterodimeric GTPase Activating Protein subunit [Source:UniProtKB/TrEMBL;Acc:H9G2Q4]	|
WBGene00050933	T19C9.9	|	78.773	|			|
WBGene00011323	mut-15	|	78.718	|		MUTator [Source:UniProtKB/TrEMBL;Acc:E1B6U1]	|
WBGene00003602	nhr-3	|	78.651	|		Nuclear hormone receptor family member nhr-3 [Source:UniProtKB/Swiss-Prot;Acc:Q9XTJ4]	|
WBGene00003369	mlc-1	|	78.633	|	Calcium binding protein;Calcium binding protein: Others	Myosin regulatory light chain 1 [Source:UniProtKB/Swiss-Prot;Acc:P19625]	|
WBGene00011635	mdmh-35	|	78.631	|		MitochonDrial interMembrane space protein Homolog [Source:RefSeq peptide;Acc:NP_495651]	|
WBGene00002242	kvs-1	|	78.581	|	Potassium Channel;Potassium Channel: Voltage-gated: Shab/K 3		|
WBGene00005435	srh-227	|	78.471	|	Chemoreceptor;Chemoreceptor: Srh class	Serpentine Receptor, class H [Source:UniProtKB/TrEMBL;Acc:G5EBR2]	|
WBGene00005018	sqt-3	|	78.454	|		Cuticle collagen 1 [Source:UniProtKB/Swiss-Prot;Acc:P08124]	|
WBGene00008975	F20D1.3	|	78.426	|			|
WBGene00009137	bath-39	|	78.176	|		BTB and MATH domain-containing protein 39 [Source:UniProtKB/Swiss-Prot;Acc:P90846]	|
WBGene00023505	srz-102	|	78.152	|	Chemoreceptor;Chemoreceptor: Srz class	Serpentine Receptor, class Z [Source:UniProtKB/TrEMBL;Acc:Q5WRL3]	|
WBGene00021351	eif-2alpha	|	78.147	|		Eukaryotic Initiation Factor [Source:UniProtKB/TrEMBL;Acc:Q9BKU3]	|
WBGene00021558	Y45G5AM.6	|	78.13	|			|
WBGene00006386	taf-5	|	78.021	|		TAF (TBP-associated transcription factor) family [Source:UniProtKB/TrEMBL;Acc:G5EF68]	|
WBGene00000378	cct-2	|	77.977	|		T-complex protein 1 subunit beta [Source:UniProtKB/Swiss-Prot;Acc:P47207]	|
WBGene00006752	unc-13	|	77.964	|	Synaptic release machinery;Synaptic release machinery: Munc-13	Phorbol ester/diacylglycerol-binding protein unc-13 [Source:UniProtKB/Swiss-Prot;Acc:P27715]	|
WBGene00013415	ilcr-1	|	77.949	|		Interleukin cytokine receptor-related protein 1 [Source:UniProtKB/Swiss-Prot;Acc:Q9NA64]	|
WBGene00013093	cup-14	|	77.933	|			|
WBGene00001480	fmo-5	|	77.906	|		Dimethylaniline monooxygenase [N-oxide-forming] [Source:UniProtKB/TrEMBL;Acc:G5ED43]	|
WBGene00007785	tofu-1	|	77.739	|		Twenty One u-rna (21U-RNA) biogenesis Fouled Up [Source:UniProtKB/TrEMBL;Acc:O17608]	|
WBGene00018823	F54E2.1	|	77.714	|			|
WBGene00014218	ZK1098.1	|	77.714	|		WW domain-containing protein ZK1098.1 [Source:UniProtKB/Swiss-Prot;Acc:P34600]	|
WBGene00021654	Y47G7B.2	|	77.652	|			|
WBGene00001976	hmg-11	|	77.462	|		HMG; High mobility group protein I alpha [Source:UniProtKB/TrEMBL;Acc:G5EEL9]	|
WBGene00019047	F58E2.3	|	77.439	|			|
WBGene00016636	perm-2	|	77.436	|		PERMeable eggshell [Source:UniProtKB/TrEMBL;Acc:O44145]	|
WBGene00008205	sams-1	|	77.427	|		Probable S-adenosylmethionine synthase 1 [Source:UniProtKB/Swiss-Prot;Acc:O17680]	|
WBGene00016362	C33G8.4	|	77.389	|			|
WBGene00005361	srh-145	|	77.384	|	Chemoreceptor;Chemoreceptor: Srh class	Serpentine Receptor, class H [Source:UniProtKB/TrEMBL;Acc:O45403]	|
WBGene00194674	F23D12.11	|	77.361	|			|
WBGene00017098	E02D9.1	|	77.355	|			|
WBGene00011232	pck-2	|	77.217	|		Phosphoenolypyruvate CarboxyKinase [Source:UniProtKB/TrEMBL;Acc:Q7JKI2]	|
WBGene00045410	E01G4.7	|	77.1	|			|
WBGene00004917	snr-4	|	77.079	|		Probable small nuclear ribonucleoprotein Sm D2 [Source:UniProtKB/Swiss-Prot;Acc:Q18786]	|
WBGene00011093	R07B7.9	|	77.073	|			|
WBGene00017033	nekl-4	|	77.026	|		Serine/threonine-protein kinase D1044.8 [Source:UniProtKB/Swiss-Prot;Acc:P84199]	|
WBGene00001393	fat-1	|	77.014	|		Omega-3 fatty acid desaturase fat-1 [Source:UniProtKB/Swiss-Prot;Acc:Q9NEQ0]	|
WBGene00017894	F28B12.1	|	76.989	|			|
WBGene00011561	ttr-15	|	76.963	|		Transthyretin-like protein 15 [Source:UniProtKB/Swiss-Prot;Acc:Q22288]	|
WBGene00016509	adss-1	|	76.948	|		Adenylosuccinate synthetase [Source:UniProtKB/Swiss-Prot;Acc:P91134]	|
WBGene00003614	nhr-15	|	76.911	|		Nuclear Hormone Receptor family [Source:UniProtKB/TrEMBL;Acc:O61854]	|
WBGene00021093	W08F4.3	|	76.781	|			|
WBGene00008397	D2005.1	|	76.768	|			|
WBGene00195061	ZK228.13	|	76.601	|			|
WBGene00011276	aakg-5	|	76.593	|		AMP-Activated protein Kinase Gamma subunit [Source:UniProtKB/TrEMBL;Acc:Q22022]	|
WBGene00010186	nhr-283	|	76.584	|		Nuclear Hormone Receptor family [Source:UniProtKB/TrEMBL;Acc:H9G361]	|
WBGene00010688	srz-12	|	76.579	|	Chemoreceptor;Chemoreceptor: Srz class	Serpentine Receptor, class Z [Source:UniProtKB/TrEMBL;Acc:Q93869]	|
WBGene00014794	K02E2.5	|	76.47	|			|
WBGene00009654	sly-1	|	76.398	|		SLY1 homolog [Source:UniProtKB/TrEMBL;Acc:Q20364]	|
WBGene00012376	nduf-7	|	76.373	|		Probable NADH dehydrogenase [ubiquinone] iron-sulfur protein 7, mitochondrial [Source:UniProtKB/Swiss-Prot;Acc:Q94360]	|
WBGene00044762	ZK688.11	|	76.349	|			|
WBGene00012037	T26E3.4	|	76.348	|			|
WBGene00011539	fbxa-135	|	76.305	|		F-box A protein [Source:UniProtKB/TrEMBL;Acc:O62361]	|
WBGene00268192	ZK697.17	|	76.294	|			|
WBGene00271799	F07B7.17	|	76.292	|			|
WBGene00012441	glb-28	|	76.273	|	Gas receptors;Gas receptors: Globin	GLoBin related [Source:UniProtKB/TrEMBL;Acc:Q9U2R5]	|
WBGene00007653	cysl-1	|	76.273	|		Cysteine synthase 1 [Source:UniProtKB/Swiss-Prot;Acc:Q93244]	|
WBGene00018281	tbc-18	|	76.245	|		TBC (Tre-2/Bub2/Cdc16) domain family [Source:UniProtKB/TrEMBL;Acc:Q94222]	|
WBGene00050941	C33F10.14	|	76.218	|			|
WBGene00004505	rpt-5	|	76.083	|		26S protease regulatory subunit 6A [Source:UniProtKB/Swiss-Prot;Acc:O76371]	|
WBGene00022783	tomm-7	|	76.05	|		Mitochondrial import receptor subunit TOM7 homolog [Source:UniProtKB/Swiss-Prot;Acc:P34660]	|
WBGene00018736	F53B1.3	|	76.035	|			|
WBGene00017385	F11G11.5	|	75.889	|			|
WBGene00235319	F44E7.17	|	75.814	|			|
WBGene00044373	C17F4.11	|	75.795	|			|
WBGene00004273	rab-10	|	75.776	|		Ras-related protein Rab-10 [Source:UniProtKB/Swiss-Prot;Acc:Q94148]	|
WBGene00019540	K08D12.6	|	75.765	|			|
WBGene00003703	nhr-113	|	75.74	|		Nuclear Hormone Receptor family [Source:UniProtKB/TrEMBL;Acc:Q9XXL8]	|
WBGene00007216	C01A2.4	|	75.69	|			|
WBGene00015581	C07H6.4	|	75.591	|			|
WBGene00012056	nhr-285	|	75.434	|		Nuclear Hormone Receptor family [Source:UniProtKB/TrEMBL;Acc:Q7YWS6]	|
WBGene00010913	M110.3	|	75.42	|			|
WBGene00003426	msp-19	|	75.413	|		Major sperm protein 19/31/40/45/50/51/53/59/61/65/81/113/142 [Source:UniProtKB/Swiss-Prot;Acc:P53017]	|
WBGene00009306	maph-1.1	|	75.368	|		Microtubule-associated protein homolog maph-1.1 [Source:UniProtKB/Swiss-Prot;Acc:P91859]	|
WBGene00001672	gpa-10	|	75.347	|	GPCR signalling;GPCR signalling: Gα	Guanine nucleotide-binding protein alpha-10 subunit [Source:UniProtKB/Swiss-Prot;Acc:Q9BIG4]	|
WBGene00018765	mpc-2	|	75.192	|		Probable mitochondrial pyruvate carrier 2 [Source:UniProtKB/Swiss-Prot;Acc:O01578]	|
WBGene00005007	spr-2	|	75.189	|		Suppressor of presenilin-2 [Source:UniProtKB/Swiss-Prot;Acc:Q18240]	|
WBGene00002109	ins-26	|	75.16	|	Neuropeptide;Neuropeptide: Insulin-related peptides	INSulin related [Source:UniProtKB/TrEMBL;Acc:Q9XUI9]	|
WBGene00003715	nhr-125	|	75.135	|		Nuclear hormone receptor family member nhr-125 [Source:UniProtKB/Swiss-Prot;Acc:O17082]	|
WBGene00017274	F08F8.9	|	75	|			|
WBGene00004152	pqn-70	|	74.886	|		Prion-like-(Q/N-rich)-domain-bearing protein [Source:UniProtKB/TrEMBL;Acc:Q7JLH5]	|
WBGene00001177	egl-8	|	74.878	|		1-phosphatidylinositol 4,5-bisphosphate phosphodiesterase beta egl-8 [Source:UniProtKB/Swiss-Prot;Acc:G5EBH0]	|
WBGene00000276	byn-1	|	74.877	|		Cell adhesion protein byn-1 [Source:UniProtKB/Swiss-Prot;Acc:Q20932]	|
WBGene00008592	F08H9.4	|	74.822	|			|
WBGene00011983	fbxa-81	|	74.775	|		F-box A protein [Source:UniProtKB/TrEMBL;Acc:Q22727]	|
WBGene00020852	nhr-228	|	74.722	|		Nuclear Hormone Receptor family [Source:UniProtKB/TrEMBL;Acc:B7E2K1]	|
WBGene00006698	uaf-2	|	74.714	|		U2AF splicing factor [Source:UniProtKB/TrEMBL;Acc:A0A0K3AXF6]	|
WBGene00013111	sta-1	|	74.607	|		Signal transducer and activator of transcription 1 [Source:UniProtKB/Swiss-Prot;Acc:Q9NAD6]	|
WBGene00013283	sre-25	|	74.532	|			|
WBGene00005935	srx-44	|	74.518	|	Chemoreceptor;Chemoreceptor: Srx class	Serpentine Receptor, class X [Source:UniProtKB/TrEMBL;Acc:O45768]	|
WBGene00012766	Y41E3.8	|	74.44	|			|
WBGene00045195	F53F4.17	|	74.436	|			|
WBGene00022328	Y82E9BL.12	|	74.393	|			|
WBGene00020901	T28F2.2	|	74.254	|			|
WBGene00015207	B0495.8	|	74.187	|			|
WBGene00002223	klp-12	|	74.165	|	Kinesin;Kinesin: Family:Kinesin-4;Kinesin: Function:Chromosome positioning	Kinesin-Like Protein [Source:UniProtKB/TrEMBL;Acc:B3GWD7]	|
WBGene00011282	R74.8	|	74.165	|			|
WBGene00004373	rme-1	|	74	|		Receptor Mediated Endocytosis [Source:UniProtKB/TrEMBL;Acc:Q86S80]	|
WBGene00022856	cth-2	|	73.943	|		Putative cystathionine gamma-lyase 2 [Source:UniProtKB/Swiss-Prot;Acc:P55216]	|
WBGene00007730	C25G4.2	|	73.933	|		Esterase C25G4.2 [Source:UniProtKB/Swiss-Prot;Acc:Q18169]	|
WBGene00002233	kqt-1	|	73.85	|	Potassium Channel;Potassium Channel: KQT family	KQT-1 potassium channel; Potassium channel, KvQLT family [Source:UniProtKB/TrEMBL;Acc:G5EDN5]	|
WBGene00019072	fbxc-8	|	73.849	|		F-box C protein [Source:UniProtKB/TrEMBL;Acc:G5EG46]	|
WBGene00018511	F46F11.8	|	73.688	|			|
WBGene00010579	K05C4.2	|	73.597	|			|
WBGene00012216	W02D9.10	|	73.566	|			|
WBGene00017863	F27D9.4	|	73.549	|			|
WBGene00016279	C31B8.1	|	73.541	|			|
WBGene00007866	C32H11.3	|	73.421	|			|
WBGene00018199	F39E9.7	|	73.417	|			|
WBGene00008862	F15D4.5	|	73.396	|			|
WBGene00206464	F59C6.18	|	73.392	|			|
WBGene00235361	F56D6.23	|	73.24	|			|
WBGene00010896	M28.5	|	73.171	|		NHP2-like protein 1 homolog [Source:UniProtKB/Swiss-Prot;Acc:Q21568]	|
WBGene00045483	oxy-5	|	73.17	|			|
WBGene00020185	pgk-1	|	73.135	|		Probable phosphoglycerate kinase [Source:UniProtKB/Swiss-Prot;Acc:P91427]	|
WBGene00015683	C10G8.4	|	73.046	|			|
WBGene00001574	gei-17	|	73.024	|		E3 SUMO-protein ligase gei-17 [Source:UniProtKB/Swiss-Prot;Acc:Q94361]	|
WBGene00004860	sma-6	|	72.88	|		Serine/threonine-protein kinase sma-6 [Source:UniProtKB/Swiss-Prot;Acc:Q09488]	|
WBGene00007703	gbf-1	|	72.871	|			|
WBGene00022554	duxl-1	|	72.832	|		DUX (Vertebrate dual homeobox) Like [Source:UniProtKB/TrEMBL;Acc:P91547]	|
WBGene00020437	stt-3	|	72.812	|		Dolichyl-diphosphooligosaccharide--protein glycosyltransferase subunit stt-3 [Source:UniProtKB/Swiss-Prot;Acc:P46975]	|
WBGene00000446	ceh-23	|	72.701	|		Homeobox protein ceh-23 [Source:UniProtKB/Swiss-Prot;Acc:P34663]	|
WBGene00015904	irld-22	|	72.674	|	Insulin/EGF receptor-like;Insulin/EGF receptor-like: secreted	Insulin/EGF-Receptor L Domain protein [Source:UniProtKB/TrEMBL;Acc:O16395]	|
WBGene00022613	sek-3	|	72.657	|		SAPK/ERK kinase [Source:UniProtKB/TrEMBL;Acc:Q8MPS3]	|
WBGene00008420	D2030.11	|	72.557	|			|
WBGene00021926	Y55F3AM.9	|	72.518	|			|
WBGene00008066	fbxb-65	|	72.487	|		F-box B protein [Source:UniProtKB/TrEMBL;Acc:Q9XVB8]	|
WBGene00003927	pas-6	|	72.478	|		Proteasome subunit alpha type-1 [Source:UniProtKB/Swiss-Prot;Acc:O44156]	|
WBGene00019305	snap-29	|	72.463	|	Synaptic release machinery;Synaptic release machinery: Q-SNARE:Qb/c subtype	Soluble NSF attachment protein 29 [Source:UniProtKB/Swiss-Prot;Acc:P83351]	|
WBGene00005379	srh-163	|	72.42	|			|
WBGene00014234	vps-29	|	72.381	|		Vacuolar protein sorting-associated protein 29 [Source:UniProtKB/TrEMBL;Acc:Q86D99]	|
WBGene00017037	D1069.3	|	72.356	|			|
WBGene00017766	peli-1	|	72.332	|		PELI1 and PELI2 related [Source:UniProtKB/TrEMBL;Acc:Q22967]	|
WBGene00003923	pas-2	|	72.331	|		Proteasome subunit alpha type-2 [Source:UniProtKB/Swiss-Prot;Acc:Q27488]	|
WBGene00018967	ddx-15	|	72.313	|		Pre-mRNA-splicing factor ATP-dependent RNA helicase ddx-15 [Source:UniProtKB/Swiss-Prot;Acc:Q20875]	|
WBGene00006307	suf-1	|	72.157	|		SUppressor-of-Forked (Drosophila) homolog [Source:UniProtKB/TrEMBL;Acc:Q19866]	|
WBGene00011980	T24B8.7	|	72.13	|		Ubiquitin carboxyl-terminal hydrolase [Source:UniProtKB/TrEMBL;Acc:N1NVC2]	|
WBGene00003444	msp-51	|	72.09	|		Major sperm protein 19/31/40/45/50/51/53/59/61/65/81/113/142 [Source:UniProtKB/Swiss-Prot;Acc:P53017]	|
WBGene00005544	sri-32	|	72.064	|	Chemoreceptor;Chemoreceptor: Sri class	Serpentine Receptor, class I [Source:UniProtKB/TrEMBL;Acc:Q965H2]	|
WBGene00023313	H28G03.5	|	72.058	|			|
WBGene00017397	F12A10.8	|	72.053	|			|
WBGene00018638	F49E8.7	|	71.989	|			|
WBGene00020058	R13D11.4	|	71.976	|			|
WBGene00001725	grl-16	|	71.895	|		GRound-Like (Grd related) [Source:UniProtKB/TrEMBL;Acc:V6CM29]	|
WBGene00011146	pde-2	|	71.879	|	Phosphodiesterase (PDE);Phosphodiesterase (PDE): cGMP-specific PDEs	Probable 3',5'-cyclic phosphodiesterase pde-2 [Source:UniProtKB/Swiss-Prot;Acc:P30645]	|
WBGene00007856	C31H5.5	|	71.878	|			|
WBGene00021973	emc-2	|	71.842	|		EMC Endoplasmic Membrane protein Complex (Yeast EMC) homolog [Source:UniProtKB/TrEMBL;Acc:O76630]	|
WBGene00010935	M163.1	|	71.824	|			|
WBGene00016157	ari-1.2	|	71.815	|		RBR-type E3 ubiquitin transferase [Source:UniProtKB/TrEMBL;Acc:Q8I7N4]	|
WBGene00002261	ldb-1	|	71.677	|		F58A3.1a; LIM Domain Binding protein [Source:UniProtKB/TrEMBL;Acc:G5EEL0]	|
WBGene00001919	his-45	|	71.656	|		Histone H3 [Source:UniProtKB/Swiss-Prot;Acc:P08898]	|
WBGene00303368	Y49F6B.19	|	71.642	|			|
WBGene00004766	sel-9	|	71.633	|		Suppressor/enhancer of lin-12 protein 9 [Source:UniProtKB/Swiss-Prot;Acc:O17528]	|
WBGene00007256	swsn-9	|	71.628	|		SWI/SNF nucleosome remodeling complex component [Source:UniProtKB/TrEMBL;Acc:Q17581]	|
WBGene00021355	Y37E3.17	|	71.571	|			|
WBGene00006772	unc-36	|	71.463	|	Voltage-gated Calcium Channel	Voltage-dependent calcium channel unc-36 [Source:UniProtKB/Swiss-Prot;Acc:P34374]	|
WBGene00044774	F16B3.3	|	71.406	|			|
WBGene00021281	ell-1	|	71.353	|		ELL transcription elongation factor homolog [Source:UniProtKB/TrEMBL;Acc:Q9N554]	|
WBGene00004355	rha-1	|	71.241	|		ATP-dependent RNA helicase A [Source:UniProtKB/Swiss-Prot;Acc:Q22307]	|
WBGene00022110	Y71F9AL.4	|	71.213	|			|
WBGene00000288	cal-4	|	71.199	|	Calcium binding protein;Calcium binding protein: Calmodulin family	CALmodulin related genes [Source:UniProtKB/TrEMBL;Acc:G5EDZ8]	|
WBGene00001673	gpa-11	|	71.189	|	GPCR signalling;GPCR signalling: Gα	Guanine nucleotide-binding protein alpha-11 subunit [Source:UniProtKB/Swiss-Prot;Acc:O76584]	|
WBGene00009577	F40F8.4	|	71.074	|			|
WBGene00007106	B0035.3	|	71.03	|			|
WBGene00001440	fkh-8	|	70.954	|		ForKHead transcription factor family [Source:UniProtKB/TrEMBL;Acc:H2KZ39]	|
WBGene00004459	rpn-2	|	70.953	|		26S proteasome non-ATPase regulatory subunit 1 [Source:UniProtKB/Swiss-Prot;Acc:Q18115]	|
WBGene00015012	bath-20	|	70.895	|		BTB and MATH domain containing [Source:UniProtKB/TrEMBL;Acc:H2KY61]	|
WBGene00003025	lin-40	|	70.76	|			|
WBGene00012519	Y32B12A.4	|	70.739	|			|
WBGene00019893	sgt-1	|	70.725	|		Small Glutamine-rich Tetratrico repeat protein [Source:UniProtKB/TrEMBL;Acc:Q21746]	|
WBGene00012608	hphd-1	|	70.681	|		Hydroxyacid-oxoacid transhydrogenase, mitochondrial [Source:UniProtKB/Swiss-Prot;Acc:Q9U2M4]	|
WBGene00013595	atg-4.1	|	70.654	|		Cysteine protease [Source:UniProtKB/TrEMBL;Acc:Q9NA30]	|
WBGene00005415	srh-204	|	70.525	|	Chemoreceptor;Chemoreceptor: Srh class	Serpentine Receptor, class H [Source:UniProtKB/TrEMBL;Acc:O44541]	|
WBGene00013569	bath-36	|	70.525	|		BTB and MATH domain-containing protein 36 [Source:UniProtKB/Swiss-Prot;Acc:Q9XWB9]	|
WBGene00023480	srz-68	|	70.522	|			|
WBGene00005342	srh-125	|	70.49	|	Chemoreceptor;Chemoreceptor: Srh class	Serpentine Receptor, class H [Source:UniProtKB/TrEMBL;Acc:P91069]	|
WBGene00016934	mboa-3	|	70.48	|		Lysophospholipid acyltransferase; Membrane Bound O-Acyl transferase, MBOAT [Source:UniProtKB/TrEMBL;Acc:G5EC53]	|
WBGene00017816	hrpk-1	|	70.417	|		Heterogeneous nuclear RibonucleoProtein (HnRNP) K homolog [Source:UniProtKB/TrEMBL;Acc:Q8I7G9]	|
WBGene00019543	cif-1	|	70.387	|		COP9/Signalosome and eIF3 complex-shared subunit 1 [Source:UniProtKB/Swiss-Prot;Acc:Q94261]	|
WBGene00011072	tag-209	|	70.33	|			|
WBGene00007352	cdc-48.1	|	70.317	|		Transitional endoplasmic reticulum ATPase homolog 1 [Source:UniProtKB/Swiss-Prot;Acc:P54811]	|
WBGene00003950	pbs-4	|	70.293	|		Proteasome subunit beta type-2 [Source:UniProtKB/Swiss-Prot;Acc:P91477]	|
WBGene00012274	W05B5.1	|	70.279	|			|
WBGene00019465	acl-14	|	70.235	|		ACyLtransferase-like [Source:UniProtKB/TrEMBL;Acc:O01882]	|
WBGene00020190	guk-1	|	70.202	|		GUanylate Kinase [Source:UniProtKB/TrEMBL;Acc:A5HU98]	|
WBGene00005295	srh-74	|	70.18	|	Chemoreceptor;Chemoreceptor: Srh class	Serpentine Receptor, class H [Source:UniProtKB/TrEMBL;Acc:Q18640]	|
WBGene00020486	T13C5.6	|	70.139	|			|
WBGene00016961	vps-32.1	|	70.126	|		Related to yeast Vacuolar Protein Sorting factor [Source:UniProtKB/TrEMBL;Acc:Q18886]	|
WBGene00000390	cdc-42	|	70.085	|		Cell division control protein 42 homolog [Source:UniProtKB/Swiss-Prot;Acc:Q05062]	|
WBGene00012244	mrps-11	|	70.055	|		Mitochondrial Ribosomal Protein, Small [Source:UniProtKB/TrEMBL;Acc:Q23155]	|
WBGene00001065	dpy-3	|	70.05	|		DumPY: shorter than wild-type [Source:UniProtKB/TrEMBL;Acc:Q19079]	|
WBGene00014012	riok-3	|	70.018	|		Serine/threonine-protein kinase RIO3 [Source:UniProtKB/Swiss-Prot;Acc:P34649]	|
WBGene00000814	csn-2	|	69.977	|		COP9 signalosome complex subunit 2 [Source:UniProtKB/Swiss-Prot;Acc:O01422]	|
WBGene00004798	sip-1	|	69.878	|		Stress-induced protein 1 [Source:UniProtKB/Swiss-Prot;Acc:Q20363]	|
WBGene00044045	R11G10.3	|	69.844	|			|
WBGene00020097	larp-1	|	69.776	|		La-related protein 1 [Source:UniProtKB/Swiss-Prot;Acc:D5MCN2]	|
WBGene00009983	cut-2	|	69.767	|		Cuticlin-2 [Source:UniProtKB/Swiss-Prot;Acc:P34682]	|
WBGene00000962	dhc-1	|	69.729	|	Dynein motors;Dynein motors: Heavy chain	Dynein heavy chain, cytoplasmic [Source:UniProtKB/Swiss-Prot;Acc:Q19020]	|
WBGene00001458	flp-15	|	69.726	|	Neuropeptide;Neuropeptide: FMRFamides (31 flp genes)	FMRF-Like Peptide [Source:UniProtKB/TrEMBL;Acc:O46023]	|
WBGene00007759	C27A7.9	|	69.702	|			|
WBGene00015513	snpc-1.1	|	69.691	|		SNAPc (Small Nuclear RNA Activating Complex) homolog [Source:UniProtKB/TrEMBL;Acc:Q17694]	|
WBGene00005573	sri-61	|	69.612	|	Chemoreceptor;Chemoreceptor: Sri class	Serpentine Receptor, class I [Source:UniProtKB/TrEMBL;Acc:Q965L6]	|
WBGene00010620	K07A12.1	|	69.529	|			|
WBGene00008841	F15A4.6	|	69.485	|			|
WBGene00007365	C06B3.6	|	69.467	|			|
WBGene00022393	abhd-12	|	69.44	|		ABHydrolase Domain containing homolog [Source:UniProtKB/TrEMBL;Acc:Q965S2]	|
WBGene00004386	rnp-3	|	69.433	|		RNP (RRM RNA binding domain) containing [Source:UniProtKB/TrEMBL;Acc:U4PBX2]	|
WBGene00004387	rnp-4	|	69.368	|		RNA-binding protein 8A [Source:UniProtKB/TrEMBL;Acc:Q21832]	|
WBGene00012896	snrp-200	|	69.367	|		Putative U5 small nuclear ribonucleoprotein 200 kDa helicase [Source:UniProtKB/Swiss-Prot;Acc:Q9U2G0]	|
WBGene00012332	rpi-1	|	69.343	|			|
WBGene00011753	T13F3.6	|	69.341	|			|
WBGene00004806	skp-1	|	69.15	|		mammalian SKIP (Ski interacting protein) homolog [Source:RefSeq peptide;Acc:NP_505950]	|
WBGene00016523	C39B5.5	|	69.086	|		Cystatin [Source:UniProtKB/TrEMBL;Acc:C2BR91]	|
WBGene00235313	C25E10.17	|	69.059	|			|
WBGene00017317	attf-2	|	68.984	|		AT hook Transcription Factor family [Source:UniProtKB/TrEMBL;Acc:O17406]	|
WBGene00022128	Y71F9B.6	|	68.869	|			|
WBGene00013275	btb-14	|	68.866	|		BTB/POZ domain-containing protein Y57A10B.3 [Source:UniProtKB/Swiss-Prot;Acc:Q9XWH8]	|
WBGene00013692	Y105E8B.7	|	68.84	|			|
WBGene00007350	sucl-1	|	68.807	|		Succinate--CoA ligase [ADP/GDP-forming] subunit alpha, mitochondrial [Source:UniProtKB/Swiss-Prot;Acc:P53596]	|
WBGene00006975	zfp-1	|	68.794	|		Uncharacterized protein F54F2.2, isoform a [Source:UniProtKB/Swiss-Prot;Acc:P34447]	|
WBGene00012353	W09C5.7	|	68.787	|			|
WBGene00019781	M60.6	|	68.785	|			|
WBGene00007674	C18D4.4	|	68.716	|			|
WBGene00003404	mpz-1	|	68.595	|	PDZ domain protein;PDZ domain protein: PDZ only	Multiple PDZ domain protein [Source:UniProtKB/TrEMBL;Acc:G1K0W2]	|
WBGene00003185	mek-1	|	68.517	|		Dual specificity mitogen-activated protein kinase kinase mek-1 [Source:UniProtKB/Swiss-Prot;Acc:Q21307]	|
WBGene00235308	C37C3.17	|	68.455	|			|
WBGene00006768	unc-32	|	68.439	|		Probable V-type proton ATPase 116 kDa subunit a [Source:UniProtKB/Swiss-Prot;Acc:P30628]	|
WBGene00006945	wars-1	|	68.408	|		Tryptophanyl(W) Amino-acyl tRNA Synthetase; Tryptophanyl-tRNA synthetase (Cytosolic) [Source:UniProtKB/TrEMBL;Acc:G5EDY2]	|
WBGene00016405	hecd-1	|	68.319	|		E3 ubiquitin-protein ligase hecd-1 [Source:UniProtKB/Swiss-Prot;Acc:V6CLA2]	|
WBGene00004128	pqn-41	|	68.275	|		Polyglutamine-repeat protein pqn-41 [Source:UniProtKB/Swiss-Prot;Acc:C7IVR4]	|
WBGene00010349	dyf-18	|	68.262	|			|
WBGene00008815	srz-103	|	68.255	|	Chemoreceptor;Chemoreceptor: Srz class	Serpentine Receptor, class Z [Source:UniProtKB/TrEMBL;Acc:Q9XU33]	|
WBGene00007044	cpna-5	|	68.211	|		Copine family protein 5 [Source:UniProtKB/Swiss-Prot;Acc:Q09219]	|
WBGene00004457	rpm-1	|	68.159	|		E3 ubiquitin-protein ligase rpm-1 [Source:UniProtKB/Swiss-Prot;Acc:Q17551]	|
WBGene00003891	osm-11	|	68.136	|			|
WBGene00017506	F16B4.4	|	68.115	|			|
WBGene00009957	F53B2.8	|	68.105	|			|
WBGene00015145	arle-14	|	68.088	|		Adp (ADP) Ribosylation factor Like gtpase (GTPase) 14 Effector protein homolog [Source:UniProtKB/TrEMBL;Acc:Q17483]	|
WBGene00004919	snr-6	|	68.069	|		Probable small nuclear ribonucleoprotein E [Source:UniProtKB/Swiss-Prot;Acc:Q9XTU6]	|
WBGene00195073	F02E11.7	|	68.023	|			|
WBGene00006754	unc-15	|	68.017	|		Paramyosin [Source:UniProtKB/Swiss-Prot;Acc:P10567]	|
WBGene00015693	ugt-28	|	68.011	|		UDP-GlucuronosylTransferase [Source:UniProtKB/TrEMBL;Acc:P91038]	|
WBGene00015466	hyls-1	|	67.979	|		Hydrolethalus syndrome protein 1 homolog [Source:UniProtKB/Swiss-Prot;Acc:Q95X94]	|
WBGene00018971	clec-67	|	67.966	|		C-type LECtin [Source:UniProtKB/TrEMBL;Acc:Q8ITX4]	|
WBGene00019664	K11H12.8	|	67.879	|			|
WBGene00006020	srx-129	|	67.82	|	Chemoreceptor;Chemoreceptor: Srx class	Serpentine Receptor, class X [Source:UniProtKB/TrEMBL;Acc:Q7JL79]	|
WBGene00004167	pqn-87	|	67.795	|		Prion-like-(Q/N-rich)-domain-bearing protein [Source:UniProtKB/TrEMBL;Acc:G2HK03]	|
WBGene00012002	T24H10.4	|	67.782	|			|
WBGene00006755	unc-16	|	67.737	|		JNK-interacting protein [Source:UniProtKB/Swiss-Prot;Acc:P34609]	|
WBGene00000730	col-157	|	67.662	|		COLlagen [Source:UniProtKB/TrEMBL;Acc:Q22393]	|
WBGene00043156	C27F2.9	|	67.638	|			|
WBGene00003225	mev-1	|	67.556	|		Succinate dehydrogenase cytochrome b560 subunit, mitochondrial [Source:UniProtKB/Swiss-Prot;Acc:P41956]	|
WBGene00003468	msp-113	|	67.545	|		Major sperm protein 19/31/40/45/50/51/53/59/61/65/81/113/142 [Source:UniProtKB/Swiss-Prot;Acc:P53017]	|
WBGene00006604	tra-1	|	67.508	|		Sex-determining transformer protein 1 [Source:UniProtKB/Swiss-Prot;Acc:P34708]	|
WBGene00015644	C09E8.1	|	67.487	|	SLC transporter;SLC transporter: SLC6: Na+/Cl- dependent neurotransmitter transporter family (REUPTAKE)		|
WBGene00004375	rme-4	|	67.446	|		Receptor Mediated Endocytosis [Source:UniProtKB/TrEMBL;Acc:G5ECW9]	|
WBGene00017993	cec-5	|	67.439	|		C.Elegans Chromodomain protein; Chromodomain protein [Source:UniProtKB/TrEMBL;Acc:Q19973]	|
WBGene00011806	ekl-6	|	67.423	|			|
WBGene00009187	F27D4.1	|	67.368	|		Probable electron transfer flavoprotein subunit alpha, mitochondrial [Source:UniProtKB/Swiss-Prot;Acc:Q93615]	|
WBGene00012548	Y37D8A.6	|	67.349	|			|
WBGene00010961	nduo-2	|	67.342	|		NADH-ubiquinone oxidoreductase chain 2 [Source:UniProtKB/Swiss-Prot;Acc:P24889]	|
WBGene00012354	cox-4	|	67.337	|		Cytochrome OXidase assembly protein [Source:UniProtKB/TrEMBL;Acc:Q9U329]	|
WBGene00004826	skr-20	|	67.303	|		SKR-20; SKp1 Related (Ubiquitin ligase complex component) [Source:UniProtKB/TrEMBL;Acc:G5EE98]	|
WBGene00011920	T22C1.11	|	67.279	|			|
WBGene00004357	rho-1	|	67.252	|		Ras-like GTP-binding protein rhoA [Source:UniProtKB/Swiss-Prot;Acc:Q22038]	|
WBGene00011227	nlp-67	|	67.23	|	Neuropeptide;Neuropeptide: Neuropeptide-like proteins	Neuropeptide-Like Protein [Source:UniProtKB/TrEMBL;Acc:O62346]	|
WBGene00012268	W04G5.8	|	67.156	|			|
WBGene00007579	C14B1.8	|	67.143	|			|
WBGene00044244	F26D10.13	|	67.091	|			|
WBGene00008368	D1053.3	|	67.081	|			|
WBGene00005353	srh-136	|	67.076	|	Chemoreceptor;Chemoreceptor: Srh class	Serpentine Receptor, class H [Source:UniProtKB/TrEMBL;Acc:O45461]	|
WBGene00015512	mthf-1	|	67.071	|		Probable methylenetetrahydrofolate reductase [Source:UniProtKB/Swiss-Prot;Acc:Q17693]	|
WBGene00016761	tkr-2	|	67.051	|	Neuropeptide receptors;Neuropeptide receptors: Neurokinin/neuropeptide FF/orexin receptor family	TachyKinin Receptor family [Source:UniProtKB/TrEMBL;Acc:O44148]	|
WBGene00018872	F55C12.5	|	67.035	|			|
WBGene00006775	unc-39	|	66.949	|		Homeobox protein unc-39 [Source:UniProtKB/Swiss-Prot;Acc:O17894]	|
WBGene00020038	R12E2.13	|	66.916	|			|
WBGene00020216	trap-2	|	66.861	|		Translocon-associated protein subunit beta [Source:UniProtKB/Swiss-Prot;Acc:Q22169]	|
WBGene00004461	rpn-5	|	66.831	|		Proteasome Regulatory Particle, Non-ATPase-like [Source:UniProtKB/TrEMBL;Acc:Q19324]	|
WBGene00009165	gpx-1	|	66.704	|		Glutathione peroxidase 1 [Source:UniProtKB/Swiss-Prot;Acc:O02621]	|
WBGene00001665	gpa-3	|	66.641	|	GPCR signalling;GPCR signalling: Gα	Guanine nucleotide-binding protein alpha-3 subunit [Source:UniProtKB/Swiss-Prot;Acc:P28052]	|
WBGene00017161	rabn-5	|	66.612	|		RABaptiN (Rab effector) [Source:UniProtKB/TrEMBL;Acc:Q19088]	|
WBGene00012765	Y41E3.7	|	66.51	|			|
WBGene00008375	D1054.8	|	66.482	|			|
WBGene00021328	npr-23	|	66.47	|	Neuropeptide receptors	NeuroPeptide Receptor family [Source:UniProtKB/TrEMBL;Acc:Q9N452]	|
WBGene00001209	egl-45	|	66.387	|		Eukaryotic translation initiation factor 3 subunit A [Source:UniProtKB/Swiss-Prot;Acc:P34339]	|
WBGene00001884	his-10	|	66.251	|		Histone H4 [Source:UniProtKB/Swiss-Prot;Acc:P62784]	|
WBGene00003948	pbs-2	|	66.241	|		Proteasome subunit beta [Source:UniProtKB/TrEMBL;Acc:O62102]	|
WBGene00019259	H34C03.2	|	66.197	|		Ubiquitin carboxyl-terminal hydrolase [Source:UniProtKB/TrEMBL;Acc:Q9TYY8]	|
WBGene00009054	F22D6.9	|	66.103	|		Serine/threonine-protein phosphatase [Source:UniProtKB/TrEMBL;Acc:Q27494]	|
WBGene00007135	cdk-12	|	66.099	|		Cyclin-dependent kinase 12 [Source:UniProtKB/Swiss-Prot;Acc:P46551]	|
WBGene00019205	kcc-2	|	66.08	|	SLC transporter;SLC transporter: SLC12: cation-chloride cotransporter family	K+/Cl-Cotransporter [Source:UniProtKB/TrEMBL;Acc:V6CJH3]	|
WBGene00002120	ins-37	|	66.08	|	Neuropeptide;Neuropeptide: Insulin-related peptides	INSulin related [Source:UniProtKB/TrEMBL;Acc:Q9XVA1]	|
WBGene00003171	mec-7	|	66.071	|		Tubulin beta-1 chain [Source:UniProtKB/Swiss-Prot;Acc:P12456]	|
WBGene00006829	unc-101	|	66.068	|		AP-1 complex subunit mu-1-I [Source:UniProtKB/Swiss-Prot;Acc:P35602]	|
WBGene00021854	Y54F10AR.1	|	66.057	|			|
WBGene00003181	med-2	|	66.053	|		GATA-type transcription factor; Mesoderm and Endoderm Determination [Source:UniProtKB/TrEMBL;Acc:G5EF25]	|
WBGene00001080	dpy-21	|	66.007	|		Lysine-specific demethylase 9 [Source:UniProtKB/Swiss-Prot;Acc:Q9GRZ3]	|
WBGene00002078	xpo-1	|	65.92	|		EXPOrtin (Nuclear export receptor) [Source:UniProtKB/TrEMBL;Acc:Q8MPS6]	|
WBGene00006200	str-154	|	65.881	|		Seven TM Receptor [Source:UniProtKB/TrEMBL;Acc:A0A0M7RFG8]	|
WBGene00018784	F54A3.5	|	65.847	|		MICOS complex subunit Mic10 [Source:UniProtKB/Swiss-Prot;Acc:Q9N4K0]	|
WBGene00012779	cdkl-1	|	65.753	|		Cyclin-dependent kinase-like 1 [Source:UniProtKB/Swiss-Prot;Acc:Q9U2H1]	|
WBGene00045283	K08E4.8	|	65.728	|			|
WBGene00005560	sri-48	|	65.666	|	Chemoreceptor;Chemoreceptor: Sri class	Serpentine Receptor, class I [Source:UniProtKB/TrEMBL;Acc:P91552]	|
WBGene00008947	srz-16	|	65.656	|	Chemoreceptor;Chemoreceptor: Srz class	Serpentine Receptor, class Z [Source:UniProtKB/TrEMBL;Acc:Q9U3I8]	|
WBGene00000065	act-3	|	65.647	|		Actin-3 [Source:UniProtKB/Swiss-Prot;Acc:P0DM42]	|
WBGene00010891	M18.6	|	65.636	|			|
WBGene00008003	enu-3.2	|	65.635	|		ENhancer of Uncoordination [Source:UniProtKB/TrEMBL;Acc:Q18507]	|
WBGene00003073	lars-1	|	65.583	|		Leucine--tRNA ligase [Source:UniProtKB/Swiss-Prot;Acc:Q09996]	|
WBGene00004754	sec-23	|	65.489	|		Protein transport protein SEC23 [Source:UniProtKB/TrEMBL;Acc:Q9U2Z1]	|
WBGene00008649	F10D11.3	|	65.478	|			|
WBGene00005265	srh-42	|	65.449	|	Chemoreceptor;Chemoreceptor: Srh class	Serpentine Receptor, class H [Source:UniProtKB/TrEMBL;Acc:Q7YXA6]	|
WBGene00044361	K09F6.11	|	65.386	|			|
WBGene00018860	vpat-1	|	65.366	|		Vesicular PolyAmine Transporter [Source:UniProtKB/TrEMBL;Acc:Q8MPU6]	|
WBGene00009877	F49C12.7	|	65.361	|			|
WBGene00007630	har-1	|	65.326	|		Hemiasterlin resistant protein 1 [Source:UniProtKB/Swiss-Prot;Acc:Q09254]	|
WBGene00009045	F22B5.10	|	65.324	|		Calcium load-activated calcium channel homolog [Source:UniProtKB/Swiss-Prot;Acc:Q19714]	|
WBGene00020294	T06F4.1	|	65.313	|			|
WBGene00000381	cct-6	|	65.243	|		T-complex protein 1 subunit zeta [Source:UniProtKB/Swiss-Prot;Acc:P46550]	|
WBGene00020218	T04G9.7	|	65.228	|			|
WBGene00002295	let-19	|	65.215	|		Mediator of RNA polymerase II transcription subunit 13 [Source:UniProtKB/Swiss-Prot;Acc:Q93442]	|
WBGene00003723	nhr-133	|	65.109	|		Nuclear hormone receptor family member nhr-133 [Source:UniProtKB/Swiss-Prot;Acc:O16354]	|
WBGene00012468	Y17G7B.17	|	65.09	|			|
WBGene00000694	col-120	|	65.065	|		COLlagen [Source:UniProtKB/TrEMBL;Acc:Q9XWR2]	|
WBGene00021292	copb-1	|	65.042	|		Coatomer subunit beta [Source:UniProtKB/TrEMBL;Acc:Q9TYL9]	|
WBGene00018475	mrpl-14	|	65.025	|		Mitochondrial Ribosomal Protein, Large [Source:UniProtKB/TrEMBL;Acc:Q20430]	|
WBGene00003685	nhr-95	|	64.978	|		Nuclear Hormone Receptor family [Source:UniProtKB/TrEMBL;Acc:Q7YXC6]	|
WBGene00017889	F28B3.10	|	64.966	|			|
WBGene00000882	cyn-6	|	64.945	|		Peptidyl-prolyl cis-trans isomerase 6 [Source:UniProtKB/Swiss-Prot;Acc:P52014]	|
WBGene00000914	daf-19	|	64.941	|		RFX-like transcription factor daf-19 [Source:UniProtKB/Swiss-Prot;Acc:Q09555]	|
WBGene00019220	pfd-2	|	64.884	|		Prefoldin subunit 2 [Source:UniProtKB/Swiss-Prot;Acc:Q9N5M2]	|
WBGene00014254	cyp-13A10	|	64.868	|		Putative cytochrome P450 CYP13A10 [Source:UniProtKB/Swiss-Prot;Acc:Q09653]	|
WBGene00021015	enu-3.3	|	64.866	|		ENhancer of Uncoordination [Source:UniProtKB/TrEMBL;Acc:O44748]	|
WBGene00006040	ssp-11	|	64.862	|		Sperm-specific class P protein 9/11 [Source:UniProtKB/Swiss-Prot;Acc:Q23058]	|
WBGene00003915	pan-1	|	64.827	|	Leucine Rich Repeat (LRR) domain containing protein;Leucine Rich Repeat (LRR) domain containing protein: eLRR proteins	P-granule-associated novel protein 1 [Source:UniProtKB/Swiss-Prot;Acc:Q9U3A0]	|
WBGene00017790	F25E5.9	|	64.765	|			|
WBGene00006751	unc-11	|	64.733	|		Phosphatidylinositol-binding clathrin assembly protein unc-11 [Source:UniProtKB/Swiss-Prot;Acc:Q9XZI6]	|
WBGene00002010	hsp-6	|	64.731	|		Heat shock 70 kDa protein F, mitochondrial [Source:UniProtKB/Swiss-Prot;Acc:P11141]	|
WBGene00006595	top-1	|	64.702	|		DNA topoisomerase 1 [Source:UniProtKB/Swiss-Prot;Acc:O17966]	|
WBGene00004502	rpt-2	|	64.642	|		Probable 26S proteasome regulatory subunit 4 [Source:UniProtKB/Swiss-Prot;Acc:O16368]	|
WBGene00012897	pisy-1	|	64.627	|		CDP-diacylglycerol--inositol 3-phosphatidyltransferase [Source:UniProtKB/TrEMBL;Acc:Q9U2G1]	|
WBGene00016167	vps-22	|	64.603	|		Vacuolar-sorting protein SNF8 [Source:UniProtKB/TrEMBL;Acc:Q18258]	|
WBGene00006761	unc-24	|	64.59	|	Auxiliary subunit for:: DEG/ENaC channels (and perhaps TRP)	UNC-24 [Source:UniProtKB/TrEMBL;Acc:G5ED76]	|
WBGene00005301	srh-80	|	64.571	|	Chemoreceptor;Chemoreceptor: Srh class	Serpentine Receptor, class H [Source:UniProtKB/TrEMBL;Acc:Q9UAW4]	|
WBGene00010528	K03D3.2	|	64.553	|			|
WBGene00012234	W04A4.5	|	64.512	|			|
WBGene00010918	M117.1	|	64.506	|			|
WBGene00000524	clc-3	|	64.479	|		CLaudin-like in Caenorhabditis [Source:UniProtKB/TrEMBL;Acc:H2KYF7]	|
WBGene00012692	Y39B6A.33	|	64.445	|		Ribosome biogenesis protein NOP53 [Source:UniProtKB/Swiss-Prot;Acc:Q9NEU5]	|
WBGene00002000	hrp-2	|	64.427	|		HnRNP A1 homolog [Source:UniProtKB/TrEMBL;Acc:B3KYC2]	|
WBGene00006742	unc-2	|	64.386	|	Voltage-gated Calcium Channel;Voltage-gated Calcium Channel: non L-type	High voltage activated calcium channel alpha-1 subunit [Source:UniProtKB/TrEMBL;Acc:Q86G45]	|
WBGene00009120	F25H2.6	|	64.36	|			|
WBGene00011967	pir-1	|	64.323	|		RNA/RNP complex-1-interacting phosphatase homolog [Source:UniProtKB/Swiss-Prot;Acc:Q22707]	|
WBGene00005362	srh-146	|	64.287	|	Chemoreceptor;Chemoreceptor: Srh class	Serpentine Receptor, class H [Source:UniProtKB/TrEMBL;Acc:A0A0B7H2U2]	|
WBGene00021883	Y54G2A.18	|	64.163	|		4D656 [Source:UniProtKB/TrEMBL;Acc:G5EBI0]	|
WBGene00013238	trap-4	|	64.127	|		TRanslocon-Associated Protein [Source:UniProtKB/TrEMBL;Acc:Q9U238]	|
WBGene00044781	Y53H1A.6	|	63.968	|			|
WBGene00014300	D2023.1	|	63.962	|			|
WBGene00003401	mpk-1	|	63.948	|		Mitogen-activated protein kinase mpk-1 [Source:UniProtKB/Swiss-Prot;Acc:P39745]	|
WBGene00303011	F17C11.26	|	63.851	|			|
WBGene00011280	pelo-1	|	63.828	|			|
WBGene00002177	jkk-1	|	63.771	|		Dual specificity mitogen-activated protein kinase kinase jkk-1 [Source:UniProtKB/Swiss-Prot;Acc:G5EDT6]	|
WBGene00044026	cisd-1	|	63.683	|		CDGSH Iron Sulfur Domain protein homolog [Source:UniProtKB/TrEMBL;Acc:Q5FC71]	|
WBGene00010479	K01G5.8	|	63.658	|			|
WBGene00010878	M05D6.5	|	63.636	|			|
WBGene00001717	grl-8	|	63.602	|		GRound-Like (Grd related) [Source:UniProtKB/TrEMBL;Acc:Q23353]	|
WBGene00020181	T02H6.11	|	63.581	|			|
WBGene00022093	Y69A2AR.22	|	63.564	|			|
WBGene00017072	D2096.5	|	63.551	|			|
WBGene00202501	Y57E12B.10	|	63.534	|			|
WBGene00021088	W08E12.7	|	63.532	|			|
WBGene00003153	mca-3	|	63.51	|		Calcium-transporting ATPase [Source:UniProtKB/TrEMBL;Acc:B7CED8]	|
WBGene00001338	ears-2	|	63.496	|		Glutamyl(E) Amino-acyl tRNA Synthetase [Source:UniProtKB/TrEMBL;Acc:O44413]	|
WBGene00016907	C53H9.2	|	63.426	|			|
WBGene00011682	snt-7	|	63.354	|	Synaptic release machinery;Synaptic release machinery: synaptotagmin	SyNapTotagmin [Source:UniProtKB/TrEMBL;Acc:Q22372]	|
WBGene00013298	Y57G11B.6	|	63.276	|			|
WBGene00008452	mrps-5	|	63.271	|		Putative 28S ribosomal protein S5, mitochondrial [Source:UniProtKB/Swiss-Prot;Acc:Q93425]	|
WBGene00009366	F33H2.2	|	63.223	|			|
WBGene00018426	F44E7.4	|	63.211	|			|
WBGene00004723	sap-49	|	63.157	|		Splicing factor 3B subunit 4 [Source:UniProtKB/Swiss-Prot;Acc:Q09442]	|
[truncated: 5,384 more rows]

## Sheet: Legend
Worm-ID	Name	|	Average expression (tpm)	|	Assigned neural function	Protein descritpion	|
Gene's identification using WormBase ID	Gene's identication		Contains the average normalized gene expression of FACSed ADL neurons from wild type animals		Genes are assigned to a neuronal gene class according to Hobert, 2013	Description of corresponding protein for protein-coding genes
			Gene expression data are expressed as transcript per million (tpm)
			Only genes with an average expression > 10 tpm are listed
