# Supplementary material for: Impairing one sensory modality enhances another by reconfiguring peptidergic signalling in Caenorhabditis elegans
Source: eLife. 2022 Feb 24;11:e68040. doi: 10.7554/eLife.68040 (PMC8871372; doi:10.7554/eLife.68040)
Supplement: Supplementary file 2. [file elife-68040-supp2.xlsx]

## Sheet: Chemoreceptors
Worm-ID	Name	|	Average expression WT (tpm)	|	Assigned neural function	Gene descritpion	|
WBGene00005432	srh-222	|	7483.24	|	Chemoreceptor;Chemoreceptor: Srh class	Serpentine Receptor, class H [Source:UniProtKB/TrEMBL;Acc:O76829]	|
WBGene00005484	srh-279	|	573.112	|	Chemoreceptor;Chemoreceptor: Srh class	Serpentine Receptor, class H [Source:UniProtKB/TrEMBL;Acc:O17787]	|
WBGene00005331	srh-112	|	489.489	|	Chemoreceptor;Chemoreceptor: Srh class	Serpentine Receptor, class H [Source:UniProtKB/TrEMBL;Acc:O45793]	|
WBGene00005205	srg-48	|	489.039	|	Chemoreceptor;Chemoreceptor: Srg class	Serpentine receptor class gamma [Source:UniProtKB/TrEMBL;Acc:Q86B42]	|
WBGene00005330	srh-111	|	422.059	|	Chemoreceptor;Chemoreceptor: Srh class	Serpentine Receptor, class H [Source:UniProtKB/TrEMBL;Acc:Q9XXN9]	|
WBGene00005417	srh-207	|	368.4	|	Chemoreceptor;Chemoreceptor: Srh class	Serpentine Receptor, class H [Source:UniProtKB/TrEMBL;Acc:Q9XTR9]	|
WBGene00005430	srh-220	|	361.047	|	Chemoreceptor;Chemoreceptor: Srh class	Serpentine Receptor, class H [Source:UniProtKB/TrEMBL;Acc:Q20529]	|
WBGene00005264	srh-41	|	360.608	|	Chemoreceptor;Chemoreceptor: Srh class	Serpentine Receptor, class H [Source:UniProtKB/TrEMBL;Acc:Q9XVZ3]	|
WBGene00005363	srh-147	|	356.488	|	Chemoreceptor;Chemoreceptor: Srh class	Serpentine Receptor, class H [Source:UniProtKB/TrEMBL;Acc:Q7YXA8]	|
WBGene00005555	sri-43	|	343.337	|	Chemoreceptor;Chemoreceptor: Sri class	Serpentine Receptor, class I [Source:UniProtKB/TrEMBL;Acc:Q9TZE8]	|
WBGene00005347	srh-130	|	315.477	|	Chemoreceptor;Chemoreceptor: Srh class	Serpentine Receptor, class H [Source:UniProtKB/TrEMBL;Acc:Q9GUC3]	|
WBGene00005519	sri-7	|	314.092	|	Chemoreceptor;Chemoreceptor: Sri class	Serpentine Receptor, class I [Source:UniProtKB/TrEMBL;Acc:O45759]	|
WBGene00005375	srh-159	|	309.382	|	Chemoreceptor;Chemoreceptor: Srh class	Serpentine Receptor, class H [Source:UniProtKB/TrEMBL;Acc:Q9U3G2]	|
WBGene00005370	srh-154	|	261.939	|	Chemoreceptor;Chemoreceptor: Srh class	Serpentine Receptor, class H [Source:UniProtKB/TrEMBL;Acc:Q9XV76]	|
WBGene00005552	sri-40	|	259.279	|	Chemoreceptor;Chemoreceptor: Sri class	Serpentine Receptor, class I [Source:UniProtKB/TrEMBL;Acc:Q9N549]	|
WBGene00005518	sri-6	|	242.31	|	Chemoreceptor;Chemoreceptor: Sri class	Serpentine Receptor, class I [Source:UniProtKB/TrEMBL;Acc:Q22358]	|
WBGene00005964	srx-73	|	240.994	|	Chemoreceptor;Chemoreceptor: Srx class	Serpentine Receptor, class X [Source:UniProtKB/TrEMBL;Acc:Q3Y401]	|
WBGene00023479	srz-67	|	234.953	|	Chemoreceptor;Chemoreceptor: Srz class	Serpentine Receptor, class Z [Source:UniProtKB/TrEMBL;Acc:Q688C1]	|
WBGene00005557	sri-45	|	230.282	|	Chemoreceptor;Chemoreceptor: Sri class	Serpentine Receptor, class I [Source:UniProtKB/TrEMBL;Acc:O16690]	|
WBGene00005390	srh-174	|	224.741	|	Chemoreceptor;Chemoreceptor: Srh class	Serpentine Receptor, class H [Source:UniProtKB/TrEMBL;Acc:Q9XV29]	|
WBGene00005550	sri-38	|	221.807	|	Chemoreceptor;Chemoreceptor: Sri class	Serpentine Receptor, class I [Source:UniProtKB/TrEMBL;Acc:O16594]	|
WBGene00005281	srh-59	|	220.158	|	Chemoreceptor;Chemoreceptor: Srh class	Serpentine Receptor, class H [Source:UniProtKB/TrEMBL;Acc:O44909]	|
WBGene00005542	sri-30	|	205.744	|	Chemoreceptor;Chemoreceptor: Sri class	Serpentine Receptor, class I [Source:UniProtKB/TrEMBL;Acc:Q95X80]	|
WBGene00005389	srh-173	|	203.226	|	Chemoreceptor;Chemoreceptor: Srh class	Serpentine Receptor, class H [Source:UniProtKB/TrEMBL;Acc:M1ZK04]	|
WBGene00008126	sre-21	|	201.234	|	Chemoreceptor;Chemoreceptor: Sre class	Serpentine receptor class epsilon-21 [Source:UniProtKB/Swiss-Prot;Acc:O45306]	|
WBGene00005393	srh-178	|	187.804	|	Chemoreceptor;Chemoreceptor: Srh class	Serpentine Receptor, class H [Source:UniProtKB/TrEMBL;Acc:G5EBQ4]	|
WBGene00005397	srh-182	|	182.865	|	Chemoreceptor;Chemoreceptor: Srh class	Serpentine Receptor, class H [Source:UniProtKB/TrEMBL;Acc:O46006]	|
WBGene00014195	srz-10	|	172.444	|	Chemoreceptor;Chemoreceptor: Srz class	Serpentine Receptor, class Z [Source:UniProtKB/TrEMBL;Acc:G5EDS7]	|
WBGene00005386	srh-170	|	163.386	|	Chemoreceptor;Chemoreceptor: Srh class	Serpentine Receptor, class H [Source:UniProtKB/TrEMBL;Acc:O17986]	|
WBGene00005328	srh-109	|	157.924	|	Chemoreceptor;Chemoreceptor: Srh class	Serpentine Receptor, class H [Source:UniProtKB/TrEMBL;Acc:O45795]	|
WBGene00005531	sri-19	|	156.121	|	Chemoreceptor;Chemoreceptor: Sri class	Serpentine Receptor, class I [Source:UniProtKB/TrEMBL;Acc:J7S134]	|
WBGene00010527	srz-74	|	155.769	|	Chemoreceptor;Chemoreceptor: Srz class	Serpentine Receptor, class Z [Source:UniProtKB/TrEMBL;Acc:O45639]	|
WBGene00005187	srg-30	|	154.256	|	Chemoreceptor;Chemoreceptor: Srg class	Serpentine receptor class gamma-30 [Source:UniProtKB/Swiss-Prot;Acc:O45150]	|
WBGene00005428	srh-218	|	153.672	|	Chemoreceptor;Chemoreceptor: Srh class	Serpentine Receptor, class H [Source:UniProtKB/TrEMBL;Acc:Q7YTT3]	|
WBGene00013907	sre-20	|	153.126	|	Chemoreceptor;Chemoreceptor: Sre class	Serpentine Receptor, class E (Epsilon) [Source:UniProtKB/TrEMBL;Acc:G3MU24]	|
WBGene00005543	sri-31	|	149.2	|	Chemoreceptor;Chemoreceptor: Sri class	Serpentine Receptor, class I [Source:UniProtKB/TrEMBL;Acc:O17172]	|
WBGene00023474	srz-37	|	148.486	|	Chemoreceptor;Chemoreceptor: Srz class	Serpentine Receptor, class Z [Source:UniProtKB/TrEMBL;Acc:Q688B8]	|
WBGene00010800	srsx-37	|	143.397	|	Chemoreceptor;Chemoreceptor: Srsx class	Serpentine Receptor, class SX [Source:UniProtKB/TrEMBL;Acc:O17961]	|
WBGene00016827	sre-53	|	141.769	|	Chemoreceptor;Chemoreceptor: Sre class	Serpentine Receptor, class E (Epsilon) [Source:UniProtKB/TrEMBL;Acc:A3QMA1]	|
WBGene00005540	sri-28	|	140.545	|	Chemoreceptor;Chemoreceptor: Sri class	Serpentine Receptor, class I [Source:UniProtKB/TrEMBL;Acc:O17171]	|
WBGene00012026	srz-100	|	138.88	|	Chemoreceptor;Chemoreceptor: Srz class	Serpentine Receptor, class Z [Source:UniProtKB/TrEMBL;Acc:O45825]	|
WBGene00012333	sre-43	|	138.26	|	Chemoreceptor;Chemoreceptor: Sre class	Serpentine Receptor, class E (Epsilon) [Source:UniProtKB/TrEMBL;Acc:Q9XUJ9]	|
WBGene00012028	srz-99	|	134.909	|	Chemoreceptor;Chemoreceptor: Srz class	Serpentine Receptor, class Z [Source:UniProtKB/TrEMBL;Acc:Q86D02]	|
WBGene00005578	sri-66	|	132.842	|	Chemoreceptor;Chemoreceptor: Sri class	Serpentine Receptor, class I [Source:UniProtKB/TrEMBL;Acc:O45416]	|
WBGene00005149	sre-1	|	132.788	|	Chemoreceptor;Chemoreceptor: Sre class	Serpentine receptor class epsilon-1 [Source:UniProtKB/Swiss-Prot;Acc:Q09213]	|
WBGene00012288	sre-32	|	132.333	|	Chemoreceptor;Chemoreceptor: Sre class	Serpentine receptor class epsilon-32 [Source:UniProtKB/Swiss-Prot;Acc:P90837]	|
WBGene00015653	srz-78	|	131.092	|	Chemoreceptor;Chemoreceptor: Srz class	Serpentine Receptor, class Z [Source:UniProtKB/TrEMBL;Acc:O44459]	|
WBGene00005999	srx-108	|	130.555	|	Chemoreceptor;Chemoreceptor: Srx class	Serpentine Receptor, class X [Source:UniProtKB/TrEMBL;Acc:O17096]	|
WBGene00005584	sri-72	|	126.925	|	Chemoreceptor;Chemoreceptor: Sri class	Serpentine Receptor, class I [Source:UniProtKB/TrEMBL;Acc:A0A0B7H3M6]	|
WBGene00016928	srb-19	|	125.332	|	Chemoreceptor;Chemoreceptor: Srb class	Serpentine Receptor, class B (Beta) [Source:UniProtKB/TrEMBL;Acc:Q5CCI8]	|
WBGene00005655	srr-4	|	120.679	|	Chemoreceptor;Chemoreceptor: Srr class	Serpentine Receptor, class R [Source:UniProtKB/TrEMBL;Acc:H2KYR4]	|
WBGene00005574	sri-62	|	118.054	|	Chemoreceptor;Chemoreceptor: Sri class	Serpentine Receptor, class I [Source:UniProtKB/TrEMBL;Acc:Q965L7]	|
WBGene00005399	srh-184	|	116.681	|	Chemoreceptor;Chemoreceptor: Srh class	Serpentine Receptor, class H [Source:UniProtKB/TrEMBL;Acc:Q18952]	|
WBGene00005512	srh-105	|	115.773	|	Chemoreceptor;Chemoreceptor: Srh class	Serpentine Receptor, class H [Source:UniProtKB/TrEMBL;Acc:Q9TXQ3]	|
WBGene00013276	sre-42	|	114.931	|	Chemoreceptor;Chemoreceptor: Sre class	Serpentine Receptor, class E (Epsilon) [Source:UniProtKB/TrEMBL;Acc:Q9XWH7]	|
WBGene00005486	srh-281	|	114.332	|	Chemoreceptor;Chemoreceptor: Srh class	Serpentine Receptor, class H [Source:UniProtKB/TrEMBL;Acc:O17786]	|
WBGene00020225	sre-40	|	114.198	|	Chemoreceptor;Chemoreceptor: Sre class	Serpentine Receptor, class E (Epsilon) [Source:UniProtKB/TrEMBL;Acc:Q22209]	|
WBGene00005364	srh-148	|	113.469	|	Chemoreceptor;Chemoreceptor: Srh class	Serpentine Receptor, class H [Source:UniProtKB/TrEMBL;Acc:Q93867]	|
WBGene00023506	srz-11	|	110.66	|	Chemoreceptor;Chemoreceptor: Srz class	Serpentine Receptor, class Z [Source:UniProtKB/TrEMBL;Acc:Q5WRL4]	|
WBGene00005461	srh-255	|	110.165	|	Chemoreceptor;Chemoreceptor: Srh class	Serpentine Receptor, class H [Source:UniProtKB/TrEMBL;Acc:Q7YXB0]	|
WBGene00005332	srh-113	|	108.613	|	Chemoreceptor;Chemoreceptor: Srh class	Serpentine Receptor, class H [Source:UniProtKB/TrEMBL;Acc:Q9XXQ1]	|
WBGene00005541	sri-29	|	108.414	|	Chemoreceptor;Chemoreceptor: Sri class	Serpentine Receptor, class I [Source:UniProtKB/TrEMBL;Acc:O17170]	|
WBGene00018973	srz-20	|	108.316	|	Chemoreceptor;Chemoreceptor: Srz class	Serpentine Receptor, class Z [Source:UniProtKB/TrEMBL;Acc:U4PCJ9]	|
WBGene00009912	srz-94	|	107.371	|	Chemoreceptor;Chemoreceptor: Srz class	Serpentine Receptor, class Z [Source:UniProtKB/TrEMBL;Acc:Q9XV00]	|
WBGene00005406	srh-193	|	107.044	|	Chemoreceptor;Chemoreceptor: Srh class	Serpentine Receptor, class H [Source:UniProtKB/TrEMBL;Acc:Q22989]	|
WBGene00005249	srh-25	|	106.627	|	Chemoreceptor;Chemoreceptor: Srh class	Serpentine Receptor, class H [Source:UniProtKB/TrEMBL;Acc:Q18834]	|
WBGene00005472	srh-266	|	104.112	|	Chemoreceptor;Chemoreceptor: Srh class	Serpentine Receptor, class H [Source:UniProtKB/TrEMBL;Acc:O17130]	|
WBGene00005565	sri-53	|	103.552	|	Chemoreceptor;Chemoreceptor: Sri class	Serpentine Receptor, class I [Source:UniProtKB/TrEMBL;Acc:P91553]	|
WBGene00005348	srh-131	|	100.279	|	Chemoreceptor;Chemoreceptor: Srh class	Serpentine Receptor, class H [Source:UniProtKB/TrEMBL;Acc:Q9XX66]	|
WBGene00023463	srz-82	|	99.893	|	Chemoreceptor;Chemoreceptor: Srz class	Serpentine Receptor, class Z [Source:UniProtKB/TrEMBL;Acc:Q6A588]	|
WBGene00005300	srh-79	|	99.824	|	Chemoreceptor;Chemoreceptor: Srh class	Serpentine Receptor, class H [Source:UniProtKB/TrEMBL;Acc:O76661]	|
WBGene00005554	sri-42	|	99.429	|	Chemoreceptor;Chemoreceptor: Sri class	Serpentine Receptor, class I [Source:UniProtKB/TrEMBL;Acc:Q9TZE9]	|
WBGene00005539	sri-27	|	96.372	|	Chemoreceptor;Chemoreceptor: Sri class	Serpentine Receptor, class I [Source:UniProtKB/TrEMBL;Acc:O44574]	|
WBGene00021722	srz-5	|	95.651	|	Chemoreceptor;Chemoreceptor: Srz class	Serpentine Receptor, class Z [Source:UniProtKB/TrEMBL;Acc:Q9N4T9]	|
WBGene00018972	srz-19	|	95.411	|	Chemoreceptor;Chemoreceptor: Srz class	Serpentine Receptor, class Z [Source:UniProtKB/TrEMBL;Acc:Q8ITX5]	|
WBGene00015656	srz-70	|	95.23	|	Chemoreceptor;Chemoreceptor: Srz class	Serpentine Receptor, class Z [Source:UniProtKB/TrEMBL;Acc:Q688B9]	|
WBGene00005558	sri-46	|	94.148	|	Chemoreceptor;Chemoreceptor: Sri class	Serpentine Receptor, class I [Source:UniProtKB/TrEMBL;Acc:A0A0M7RDQ2]	|
WBGene00005394	srh-179	|	91.921	|	Chemoreceptor;Chemoreceptor: Srh class	Serpentine Receptor, class H [Source:UniProtKB/TrEMBL;Acc:O46012]	|
WBGene00019051	srz-23	|	90.231	|	Chemoreceptor;Chemoreceptor: Srz class	Serpentine Receptor, class Z [Source:UniProtKB/TrEMBL;Acc:Q9TZ00]	|
WBGene00023475	srz-69	|	88.337	|	Chemoreceptor;Chemoreceptor: Srz class	Serpentine Receptor, class Z [Source:UniProtKB/TrEMBL;Acc:U3UB87]	|
WBGene00043052	srz-104	|	88.304	|	Chemoreceptor;Chemoreceptor: Srz class	Serpentine Receptor, class Z [Source:UniProtKB/TrEMBL;Acc:Q5WRL6]	|
WBGene00012286	sre-35	|	87.591	|	Chemoreceptor;Chemoreceptor: Sre class	Serpentine Receptor, class E (Epsilon) [Source:UniProtKB/TrEMBL;Acc:Q5FC42]	|
WBGene00012287	sre-33	|	87.523	|	Chemoreceptor;Chemoreceptor: Sre class	Serpentine receptor class epsilon-33 [Source:UniProtKB/Swiss-Prot;Acc:O18175]	|
WBGene00005572	sri-60	|	86.912	|	Chemoreceptor;Chemoreceptor: Sri class	Serpentine Receptor, class I [Source:UniProtKB/TrEMBL;Acc:Q965H1]	|
WBGene00005316	srh-97	|	86.361	|	Chemoreceptor;Chemoreceptor: Srh class	Serpentine Receptor, class H [Source:UniProtKB/TrEMBL;Acc:Q9XV05]	|
WBGene00016093	srsx-34	|	84.432	|	Chemoreceptor;Chemoreceptor: Srsx class	Serpentine Receptor, class SX [Source:UniProtKB/TrEMBL;Acc:H2KZ10]	|
WBGene00005338	srh-119	|	84.416	|	Chemoreceptor;Chemoreceptor: Srh class	Serpentine Receptor, class H [Source:UniProtKB/TrEMBL;Acc:Q9XX73]	|
WBGene00005410	srh-199	|	83.961	|	Chemoreceptor;Chemoreceptor: Srh class	Serpentine Receptor, class H [Source:UniProtKB/TrEMBL;Acc:O44579]	|
WBGene00005400	srh-185	|	83.117	|	Chemoreceptor;Chemoreceptor: Srh class	Serpentine Receptor, class H [Source:UniProtKB/TrEMBL;Acc:O16472]	|
WBGene00005387	srh-171	|	83.093	|	Chemoreceptor;Chemoreceptor: Srh class	Serpentine Receptor, class H [Source:UniProtKB/TrEMBL;Acc:Q9U1Z9]	|
WBGene00006021	srx-130	|	80.08	|	Chemoreceptor;Chemoreceptor: Srx class	Serpentine Receptor, class X [Source:UniProtKB/TrEMBL;Acc:A9QY31]	|
WBGene00005163	srg-5	|	79.206	|	Chemoreceptor;Chemoreceptor: Srg class	Serpentine receptor class gamma-5 [Source:UniProtKB/Swiss-Prot;Acc:P54127]	|
WBGene00005536	sri-24	|	79.053	|	Chemoreceptor;Chemoreceptor: Sri class	Serpentine Receptor, class I [Source:UniProtKB/TrEMBL;Acc:O17663]	|
WBGene00005414	srh-203	|	78.913	|	Chemoreceptor;Chemoreceptor: Srh class	Serpentine Receptor, class H [Source:UniProtKB/TrEMBL;Acc:Q9XV78]	|
WBGene00005435	srh-227	|	78.471	|	Chemoreceptor;Chemoreceptor: Srh class	Serpentine Receptor, class H [Source:UniProtKB/TrEMBL;Acc:G5EBR2]	|
WBGene00023505	srz-102	|	78.152	|	Chemoreceptor;Chemoreceptor: Srz class	Serpentine Receptor, class Z [Source:UniProtKB/TrEMBL;Acc:Q5WRL3]	|
WBGene00005361	srh-145	|	77.384	|	Chemoreceptor;Chemoreceptor: Srh class	Serpentine Receptor, class H [Source:UniProtKB/TrEMBL;Acc:O45403]	|
WBGene00010688	srz-12	|	76.579	|	Chemoreceptor;Chemoreceptor: Srz class	Serpentine Receptor, class Z [Source:UniProtKB/TrEMBL;Acc:Q93869]	|
WBGene00005935	srx-44	|	74.518	|	Chemoreceptor;Chemoreceptor: Srx class	Serpentine Receptor, class X [Source:UniProtKB/TrEMBL;Acc:O45768]	|
WBGene00005544	sri-32	|	72.064	|	Chemoreceptor;Chemoreceptor: Sri class	Serpentine Receptor, class I [Source:UniProtKB/TrEMBL;Acc:Q965H2]	|
WBGene00005415	srh-204	|	70.525	|	Chemoreceptor;Chemoreceptor: Srh class	Serpentine Receptor, class H [Source:UniProtKB/TrEMBL;Acc:O44541]	|
WBGene00005342	srh-125	|	70.49	|	Chemoreceptor;Chemoreceptor: Srh class	Serpentine Receptor, class H [Source:UniProtKB/TrEMBL;Acc:P91069]	|
WBGene00005295	srh-74	|	70.18	|	Chemoreceptor;Chemoreceptor: Srh class	Serpentine Receptor, class H [Source:UniProtKB/TrEMBL;Acc:Q18640]	|
WBGene00005573	sri-61	|	69.612	|	Chemoreceptor;Chemoreceptor: Sri class	Serpentine Receptor, class I [Source:UniProtKB/TrEMBL;Acc:Q965L6]	|
WBGene00008815	srz-103	|	68.255	|	Chemoreceptor;Chemoreceptor: Srz class	Serpentine Receptor, class Z [Source:UniProtKB/TrEMBL;Acc:Q9XU33]	|
WBGene00006020	srx-129	|	67.82	|	Chemoreceptor;Chemoreceptor: Srx class	Serpentine Receptor, class X [Source:UniProtKB/TrEMBL;Acc:Q7JL79]	|
WBGene00005353	srh-136	|	67.076	|	Chemoreceptor;Chemoreceptor: Srh class	Serpentine Receptor, class H [Source:UniProtKB/TrEMBL;Acc:O45461]	|
WBGene00005560	sri-48	|	65.666	|	Chemoreceptor;Chemoreceptor: Sri class	Serpentine Receptor, class I [Source:UniProtKB/TrEMBL;Acc:P91552]	|
WBGene00008947	srz-16	|	65.656	|	Chemoreceptor;Chemoreceptor: Srz class	Serpentine Receptor, class Z [Source:UniProtKB/TrEMBL;Acc:Q9U3I8]	|
WBGene00005265	srh-42	|	65.449	|	Chemoreceptor;Chemoreceptor: Srh class	Serpentine Receptor, class H [Source:UniProtKB/TrEMBL;Acc:Q7YXA6]	|
WBGene00005301	srh-80	|	64.571	|	Chemoreceptor;Chemoreceptor: Srh class	Serpentine Receptor, class H [Source:UniProtKB/TrEMBL;Acc:Q9UAW4]	|
WBGene00005362	srh-146	|	64.287	|	Chemoreceptor;Chemoreceptor: Srh class	Serpentine Receptor, class H [Source:UniProtKB/TrEMBL;Acc:A0A0B7H2U2]	|
WBGene00016519	srz-56	|	62.68	|	Chemoreceptor;Chemoreceptor: Srz class	Serpentine Receptor, class Z [Source:UniProtKB/TrEMBL;Acc:Q9N5W5]	|
WBGene00007678	srz-90	|	62.351	|	Chemoreceptor;Chemoreceptor: Srz class	Serpentine Receptor, class Z [Source:UniProtKB/TrEMBL;Acc:Q9XVD7]	|
WBGene00005892	srx-1	|	61.221	|	Chemoreceptor;Chemoreceptor: Srx class	Serpentine Receptor, class X [Source:UniProtKB/TrEMBL;Acc:O45695]	|
WBGene00005920	srx-29	|	60.784	|	Chemoreceptor;Chemoreceptor: Srx class	Serpentine Receptor, class X [Source:UniProtKB/TrEMBL;Acc:O45662]	|
WBGene00012847	srxa-15	|	60.377	|	Chemoreceptor;Chemoreceptor: Srxa class	Serpentine Receptor, class XA [Source:UniProtKB/TrEMBL;Acc:M1ZK02]	|
WBGene00008574	srbc-61	|	60.288	|	Chemoreceptor;Chemoreceptor: Srbc class	Serpentine Receptor, class BC (Class B-like) [Source:UniProtKB/TrEMBL;Acc:Q9XXP2]	|
WBGene00005523	sri-11	|	59.975	|	Chemoreceptor;Chemoreceptor: Sri class	Serpentine Receptor, class I [Source:UniProtKB/TrEMBL;Acc:O18110]	|
WBGene00005299	srh-78	|	59.535	|	Chemoreceptor;Chemoreceptor: Srh class	Serpentine Receptor, class H [Source:UniProtKB/TrEMBL;Acc:Q9UAW3]	|
WBGene00005585	sri-73	|	59.483	|	Chemoreceptor;Chemoreceptor: Sri class	Serpentine Receptor, class I [Source:UniProtKB/TrEMBL;Acc:O44676]	|
WBGene00015018	srz-85	|	59.21	|	Chemoreceptor;Chemoreceptor: Srz class	Serpentine Receptor, class Z [Source:UniProtKB/TrEMBL;Acc:Q5F4U1]	|
WBGene00005315	srh-95	|	58.778	|	Chemoreceptor;Chemoreceptor: Srh class	Serpentine Receptor, class H [Source:UniProtKB/TrEMBL;Acc:Q9BI92]	|
WBGene00044587	srz-105	|	58.639	|	Chemoreceptor;Chemoreceptor: Srz class	Serpentine Receptor, class Z [Source:UniProtKB/TrEMBL;Acc:Q4EVX9]	|
WBGene00009569	srz-66	|	58.485	|	Chemoreceptor;Chemoreceptor: Srz class	Serpentine Receptor, class Z [Source:UniProtKB/TrEMBL;Acc:Q9XV27]	|
WBGene00012055	srsx-36	|	58.142	|	Chemoreceptor;Chemoreceptor: Srsx class	Serpentine Receptor, class SX [Source:UniProtKB/TrEMBL;Acc:O45831]	|
WBGene00005335	srh-116	|	57.944	|	Chemoreceptor;Chemoreceptor: Srh class	Serpentine Receptor, class H [Source:UniProtKB/TrEMBL;Acc:O45965]	|
WBGene00005546	sri-34	|	57.763	|	Chemoreceptor;Chemoreceptor: Sri class	Serpentine Receptor, class I [Source:UniProtKB/TrEMBL;Acc:Q966C3]	|
WBGene00005218	srg-61	|	57.599	|	Chemoreceptor;Chemoreceptor: Srg class	Serpentine receptor class gamma [Source:UniProtKB/TrEMBL;Acc:O76440]	|
WBGene00005321	srh-102	|	57.429	|	Chemoreceptor;Chemoreceptor: Srh class	Serpentine Receptor, class H [Source:UniProtKB/TrEMBL;Acc:Q9XV25]	|
WBGene00005482	srh-277	|	57.09	|	Chemoreceptor;Chemoreceptor: Srh class	Serpentine Receptor, class H [Source:UniProtKB/TrEMBL;Acc:O45660]	|
WBGene00010217	sre-31	|	56.111	|	Chemoreceptor;Chemoreceptor: Sre class	Serpentine receptor class epsilon-31 [Source:UniProtKB/Swiss-Prot;Acc:O62266]	|
WBGene00016472	srbc-6	|	55.48	|	Chemoreceptor;Chemoreceptor: Srbc class	Serpentine Receptor, class BC (Class B-like) [Source:UniProtKB/TrEMBL;Acc:O16411]	|
WBGene00023515	srz-97	|	55.329	|	Chemoreceptor;Chemoreceptor: Srz class	Serpentine Receptor, class Z [Source:UniProtKB/TrEMBL;Acc:Q5WRN2]	|
WBGene00005559	sri-47	|	55.289	|	Chemoreceptor;Chemoreceptor: Sri class	Serpentine Receptor, class I [Source:UniProtKB/TrEMBL;Acc:O16714]	|
WBGene00011570	sre-28	|	55.058	|	Chemoreceptor;Chemoreceptor: Sre class	Serpentine Receptor, class E (Epsilon) [Source:UniProtKB/TrEMBL;Acc:Q22284]	|
WBGene00005306	srh-85	|	54.964	|	Chemoreceptor;Chemoreceptor: Srh class	Serpentine Receptor, class H [Source:UniProtKB/TrEMBL;Acc:A0A0M6VDE6]	|
WBGene00014679	srz-25	|	54.195	|	Chemoreceptor;Chemoreceptor: Srz class	Serpentine Receptor, class Z [Source:UniProtKB/TrEMBL;Acc:Q5WRM5]	|
WBGene00016828	sre-52	|	53.937	|	Chemoreceptor;Chemoreceptor: Sre class	Serpentine Receptor, class E (Epsilon) [Source:UniProtKB/TrEMBL;Acc:A3QMA3]	|
WBGene00023508	srz-38	|	53.427	|	Chemoreceptor;Chemoreceptor: Srz class	Serpentine Receptor, class Z [Source:UniProtKB/TrEMBL;Acc:Q5WRL9]	|
WBGene00005714	srv-3	|	52.22	|	Chemoreceptor;Chemoreceptor: Srv class	Serpentine receptor class gamma [Source:UniProtKB/TrEMBL;Acc:Q86GB7]	|
WBGene00010218	sre-30	|	51.392	|	Chemoreceptor;Chemoreceptor: Sre class	Serpentine receptor class epsilon-30 [Source:UniProtKB/Swiss-Prot;Acc:O62267]	|
WBGene00005538	sri-26	|	51.023	|	Chemoreceptor;Chemoreceptor: Sri class	Serpentine Receptor, class I [Source:UniProtKB/TrEMBL;Acc:Q9U3M4]	|
WBGene00005437	srh-229	|	50.97	|	Chemoreceptor;Chemoreceptor: Srh class	Serpentine Receptor, class H [Source:UniProtKB/TrEMBL;Acc:O76662]	|
WBGene00005344	srh-127	|	50.963	|	Chemoreceptor;Chemoreceptor: Srh class	Serpentine Receptor, class H [Source:UniProtKB/TrEMBL;Acc:O45171]	|
WBGene00005038	sra-12	|	50.404	|	Chemoreceptor;Chemoreceptor: Sra class	Serpentine receptor class alpha-12 [Source:UniProtKB/Swiss-Prot;Acc:Q20410]	|
WBGene00013282	sre-26	|	50.092	|	Chemoreceptor;Chemoreceptor: Sre class	Serpentine receptor class epsilon-26 [Source:UniProtKB/Swiss-Prot;Acc:O62489]	|
WBGene00005296	srh-75	|	50.065	|	Chemoreceptor;Chemoreceptor: Srh class	Serpentine Receptor, class H [Source:UniProtKB/TrEMBL;Acc:Q7JKP7]	|
WBGene00005337	srh-118	|	49.221	|	Chemoreceptor;Chemoreceptor: Srh class	Serpentine Receptor, class H [Source:UniProtKB/TrEMBL;Acc:O45651]	|
WBGene00005575	sri-63	|	49.006	|	Chemoreceptor;Chemoreceptor: Sri class	Serpentine Receptor, class I [Source:UniProtKB/TrEMBL;Acc:O17111]	|
WBGene00022481	srz-9	|	48.869	|	Chemoreceptor;Chemoreceptor: Srz class	Serpentine Receptor, class Z [Source:UniProtKB/TrEMBL;Acc:G5EFP6]	|
WBGene00005692	sru-29	|	48.663	|	Chemoreceptor;Chemoreceptor: Sru class	Serpentine Receptor, class U [Source:UniProtKB/TrEMBL;Acc:Q18729]	|
WBGene00005245	srh-20	|	47.36	|	Chemoreceptor;Chemoreceptor: Srh class	Serpentine Receptor, class H [Source:UniProtKB/TrEMBL;Acc:O16432]	|
WBGene00008818	srz-101	|	46.879	|	Chemoreceptor;Chemoreceptor: Srz class	Serpentine Receptor, class Z [Source:UniProtKB/TrEMBL;Acc:Q7YTN2]	|
WBGene00005396	srh-181	|	45.504	|	Chemoreceptor;Chemoreceptor: Srh class	Serpentine Receptor, class H [Source:UniProtKB/TrEMBL;Acc:O46011]	|
WBGene00005317	srh-98	|	44.971	|	Chemoreceptor;Chemoreceptor: Srh class	Serpentine Receptor, class H [Source:UniProtKB/TrEMBL;Acc:Q7YTT4]	|
WBGene00015175	srz-4	|	44.719	|	Chemoreceptor;Chemoreceptor: Srz class	Serpentine Receptor, class Z [Source:UniProtKB/TrEMBL;Acc:O01838]	|
WBGene00012406	srz-91	|	44.053	|	Chemoreceptor;Chemoreceptor: Srz class	Serpentine Receptor, class Z [Source:UniProtKB/TrEMBL;Acc:Q7YWQ3]	|
WBGene00005669	sru-6	|	44.048	|	Chemoreceptor;Chemoreceptor: Sru class	Serpentine Receptor, class U [Source:UniProtKB/TrEMBL;Acc:Q18363]	|
WBGene00005407	srh-194	|	43.946	|	Chemoreceptor;Chemoreceptor: Srh class	Serpentine Receptor, class H [Source:UniProtKB/TrEMBL;Acc:H2L050]	|
WBGene00005207	srg-50	|	43.513	|	Chemoreceptor;Chemoreceptor: Srg class	Serpentine receptor class gamma [Source:UniProtKB/TrEMBL;Acc:Q9N3X5]	|
WBGene00005339	srh-120	|	43.156	|	Chemoreceptor;Chemoreceptor: Srh class	Serpentine Receptor, class H [Source:UniProtKB/TrEMBL;Acc:O45845]	|
WBGene00009763	srz-18	|	43.059	|	Chemoreceptor;Chemoreceptor: Srz class	Serpentine Receptor, class Z [Source:UniProtKB/TrEMBL;Acc:Q9XV13]	|
WBGene00005481	srh-276	|	42.988	|	Chemoreceptor;Chemoreceptor: Srh class	Serpentine Receptor, class H [Source:UniProtKB/TrEMBL;Acc:O17826]	|
WBGene00005443	srh-236	|	42.951	|	Chemoreceptor;Chemoreceptor: Srh class	Serpentine Receptor, class H [Source:UniProtKB/TrEMBL;Acc:Q9XXQ3]	|
WBGene00015411	srz-60	|	40.886	|	Chemoreceptor;Chemoreceptor: Srz class	Serpentine Receptor, class Z [Source:UniProtKB/TrEMBL;Acc:O44454]	|
WBGene00005230	srh-4	|	40.425	|	Chemoreceptor;Chemoreceptor: Srh class	Serpentine Receptor, class H [Source:UniProtKB/TrEMBL;Acc:Q9N5I5]	|
WBGene00005480	srh-275	|	39.198	|	Chemoreceptor;Chemoreceptor: Srh class	Serpentine Receptor, class H [Source:UniProtKB/TrEMBL;Acc:O01451]	|
WBGene00005341	srh-123	|	39.175	|	Chemoreceptor;Chemoreceptor: Srh class	Serpentine Receptor, class H [Source:UniProtKB/TrEMBL;Acc:Q9XXP5]	|
WBGene00005227	srh-1	|	38.823	|	Chemoreceptor;Chemoreceptor: Srh class	Serpentine Receptor, class H [Source:UniProtKB/TrEMBL;Acc:Q7YXA5]	|
WBGene00005416	srh-206	|	38.213	|	Chemoreceptor;Chemoreceptor: Srh class	Serpentine Receptor, class H [Source:UniProtKB/TrEMBL;Acc:Q9XX77]	|
WBGene00005429	srh-219	|	38.2	|	Chemoreceptor;Chemoreceptor: Srh class	Serpentine Receptor, class H [Source:UniProtKB/TrEMBL;Acc:O17572]	|
WBGene00007456	srz-29	|	38.092	|	Chemoreceptor;Chemoreceptor: Srz class	Serpentine Receptor, class Z [Source:UniProtKB/TrEMBL;Acc:O62051]	|
WBGene00005263	srh-40	|	37.845	|	Chemoreceptor;Chemoreceptor: Srh class	Serpentine Receptor, class H [Source:UniProtKB/TrEMBL;Acc:O76724]	|
WBGene00005365	srh-149	|	37.257	|	Chemoreceptor;Chemoreceptor: Srh class	Serpentine Receptor, class H [Source:UniProtKB/TrEMBL;Acc:Q7YXA7]	|
WBGene00007997	sre-13	|	37.114	|	Chemoreceptor;Chemoreceptor: Sre class	Serpentine receptor class epsilon-13 [Source:UniProtKB/Swiss-Prot;Acc:O45300]	|
WBGene00005591	srj-1	|	36.579	|	Chemoreceptor;Chemoreceptor: Srj class	Serpentine Receptor, class J [Source:UniProtKB/TrEMBL;Acc:Q23625]	|
WBGene00005228	srh-2	|	36.088	|	Chemoreceptor;Chemoreceptor: Srh class	Serpentine Receptor, class H [Source:UniProtKB/TrEMBL;Acc:H2KYH0]	|
WBGene00005581	sri-69	|	36.038	|	Chemoreceptor;Chemoreceptor: Sri class	Serpentine Receptor, class I [Source:UniProtKB/TrEMBL;Acc:Q9XX83]	|
WBGene00023499	srz-63	|	35.857	|	Chemoreceptor;Chemoreceptor: Srz class	Serpentine Receptor, class Z [Source:UniProtKB/TrEMBL;Acc:Q65CL6]	|
WBGene00012329	sre-44	|	35.638	|	Chemoreceptor;Chemoreceptor: Sre class	Serpentine Receptor, class E (Epsilon) [Source:UniProtKB/TrEMBL;Acc:Q9XUK3]	|
WBGene00023411	srz-3	|	34.596	|	Chemoreceptor;Chemoreceptor: Srz class	Serpentine Receptor, class Z [Source:UniProtKB/TrEMBL;Acc:Q6BET3]	|
WBGene00008728	sre-36	|	33.805	|	Chemoreceptor;Chemoreceptor: Sre class	Serpentine Receptor, class E (Epsilon) [Source:UniProtKB/TrEMBL;Acc:Q7YTN8]	|
WBGene00005537	sri-25	|	33.37	|	Chemoreceptor;Chemoreceptor: Sri class	Serpentine Receptor, class I [Source:UniProtKB/TrEMBL;Acc:O17658]	|
WBGene00005280	srh-57	|	33.251	|	Chemoreceptor;Chemoreceptor: Srh class	Serpentine Receptor, class H [Source:UniProtKB/TrEMBL;Acc:G5EDM6]	|
WBGene00010802	srsx-39	|	32.838	|	Chemoreceptor;Chemoreceptor: Srsx class	Serpentine Receptor, class SX [Source:UniProtKB/TrEMBL;Acc:O17960]	|
WBGene00005282	srh-60	|	32.829	|	Chemoreceptor;Chemoreceptor: Srh class	Serpentine Receptor, class H [Source:UniProtKB/TrEMBL;Acc:O44908]	|
WBGene00005404	srh-190	|	32.703	|	Chemoreceptor;Chemoreceptor: Srh class	Serpentine Receptor, class H [Source:UniProtKB/TrEMBL;Acc:O16397]	|
WBGene00015652	srz-79	|	32.666	|	Chemoreceptor;Chemoreceptor: Srz class	Serpentine Receptor, class Z [Source:UniProtKB/TrEMBL;Acc:O44460]	|
WBGene00016831	sre-56	|	32.468	|	Chemoreceptor;Chemoreceptor: Sre class	Serpentine Receptor, class E (Epsilon) [Source:UniProtKB/TrEMBL;Acc:A3QMA6]	|
WBGene00017113	srz-24	|	32.246	|	Chemoreceptor;Chemoreceptor: Srz class	Serpentine Receptor, class Z [Source:UniProtKB/TrEMBL;Acc:Q5F4W1]	|
WBGene00005383	srh-167	|	31.988	|	Chemoreceptor;Chemoreceptor: Srh class	Serpentine Receptor, class H [Source:UniProtKB/TrEMBL;Acc:D7SFR0]	|
WBGene00023517	srz-75	|	31.823	|	Chemoreceptor;Chemoreceptor: Srz class	Serpentine Receptor, class Z [Source:UniProtKB/TrEMBL;Acc:Q5WRK6]	|
WBGene00005458	srh-252	|	30.945	|	Chemoreceptor;Chemoreceptor: Srh class	Serpentine Receptor, class H [Source:UniProtKB/TrEMBL;Acc:O45794]	|
WBGene00005213	srg-56	|	30.82	|	Chemoreceptor;Chemoreceptor: Srg class	Serpentine receptor class gamma [Source:UniProtKB/TrEMBL;Acc:O76439]	|
WBGene00005577	sri-65	|	30.03	|	Chemoreceptor;Chemoreceptor: Sri class	Serpentine Receptor, class I [Source:UniProtKB/TrEMBL;Acc:O45356]	|
WBGene00005408	srh-195	|	29.909	|	Chemoreceptor;Chemoreceptor: Srh class	Serpentine Receptor, class H [Source:UniProtKB/TrEMBL;Acc:O17292]	|
WBGene00005563	sri-51	|	29.226	|	Chemoreceptor;Chemoreceptor: Sri class	Serpentine Receptor, class I [Source:UniProtKB/TrEMBL;Acc:P91551]	|
WBGene00005106	srd-28	|	29.075	|	Chemoreceptor;Chemoreceptor: Srd class	Serpentine receptor class delta-28 [Source:UniProtKB/Swiss-Prot;Acc:O17956]	|
WBGene00017371	sre-39	|	28.98	|	Chemoreceptor;Chemoreceptor: Sre class	Serpentine Receptor, class E (Epsilon) [Source:UniProtKB/TrEMBL;Acc:Q19321]	|
WBGene00005524	sri-12	|	28.93	|	Chemoreceptor;Chemoreceptor: Sri class	Serpentine Receptor, class I [Source:UniProtKB/TrEMBL;Acc:O18113]	|
WBGene00005179	srg-22	|	28.299	|	Chemoreceptor;Chemoreceptor: Srg class	Serpentine receptor class gamma [Source:UniProtKB/TrEMBL;Acc:Q9TYL7]	|
WBGene00005182	srg-25	|	28.016	|	Chemoreceptor;Chemoreceptor: Srg class	Serpentine receptor class gamma [Source:UniProtKB/TrEMBL;Acc:Q23035]	|
WBGene00005569	sri-57	|	27.856	|	Chemoreceptor;Chemoreceptor: Sri class	Serpentine Receptor, class I [Source:UniProtKB/TrEMBL;Acc:O16718]	|
WBGene00008839	sre-37	|	27.403	|	Chemoreceptor;Chemoreceptor: Sre class	Serpentine receptor class epsilon-37 [Source:UniProtKB/Swiss-Prot;Acc:O17818]	|
WBGene00005590	sri-78	|	26.952	|	Chemoreceptor;Chemoreceptor: Sri class	Serpentine Receptor, class I [Source:UniProtKB/TrEMBL;Acc:Q9N547]	|
WBGene00010588	srz-14	|	26.937	|	Chemoreceptor;Chemoreceptor: Srz class	Serpentine Receptor, class Z [Source:UniProtKB/TrEMBL;Acc:O17926]	|
WBGene00008327	srz-44	|	26.855	|	Chemoreceptor;Chemoreceptor: Srz class	Serpentine Receptor, class Z [Source:UniProtKB/TrEMBL;Acc:Q7YTQ2]	|
WBGene00013277	sre-41	|	26.771	|	Chemoreceptor;Chemoreceptor: Sre class	Serpentine Receptor, class E (Epsilon) [Source:UniProtKB/TrEMBL;Acc:Q9XWH6]	|
WBGene00005229	srh-3	|	26.704	|	Chemoreceptor;Chemoreceptor: Srh class	Serpentine Receptor, class H [Source:UniProtKB/TrEMBL;Acc:Q9TXK6]	|
WBGene00043058	sre-34	|	25.933	|	Chemoreceptor;Chemoreceptor: Sre class	Serpentine Receptor, class E (Epsilon) [Source:UniProtKB/TrEMBL;Acc:Q5WRM6]	|
WBGene00015368	srt-65	|	25.577	|	Chemoreceptor;Chemoreceptor: Srt class	Serpentine Receptor, class T [Source:UniProtKB/TrEMBL;Acc:O16505]	|
WBGene00005441	srh-234	|	25.439	|	Chemoreceptor;Chemoreceptor: Srh class	Serpentine Receptor, class H [Source:UniProtKB/TrEMBL;Acc:Q9GS03]	|
WBGene00005442	srh-235	|	24.862	|	Chemoreceptor;Chemoreceptor: Srh class	Serpentine Receptor, class H [Source:UniProtKB/TrEMBL;Acc:Q9XXP3]	|
WBGene00005382	srh-166	|	24.844	|	Chemoreceptor;Chemoreceptor: Srh class	Serpentine Receptor, class H [Source:UniProtKB/TrEMBL;Acc:Q9XX38]	|
WBGene00010798	srbc-76	|	24.802	|	Chemoreceptor;Chemoreceptor: Srbc class	Serpentine Receptor, class BC (Class B-like) [Source:UniProtKB/TrEMBL;Acc:O17958]	|
WBGene00005422	srh-212	|	24.748	|	Chemoreceptor;Chemoreceptor: Srh class	Serpentine Receptor, class H [Source:UniProtKB/TrEMBL;Acc:Q94303]	|
WBGene00023513	srz-71	|	23.522	|	Chemoreceptor;Chemoreceptor: Srz class	Serpentine Receptor, class Z [Source:UniProtKB/TrEMBL;Acc:Q5WRL8]	|
WBGene00010071	sre-45	|	22.791	|	Chemoreceptor;Chemoreceptor: Sre class	Serpentine receptor class epsilon-45 [Source:UniProtKB/Swiss-Prot;Acc:O02275]	|
WBGene00008981	srz-48	|	21.728	|	Chemoreceptor;Chemoreceptor: Srz class	Serpentine Receptor, class Z [Source:UniProtKB/TrEMBL;Acc:Q9XV83]	|
WBGene00005446	srh-239	|	21.578	|	Chemoreceptor;Chemoreceptor: Srh class	Serpentine Receptor, class H [Source:UniProtKB/TrEMBL;Acc:O62384]	|
WBGene00005715	srv-4	|	21.347	|	Chemoreceptor;Chemoreceptor: Srv class	Serpentine Receptor, class V [Source:UniProtKB/TrEMBL;Acc:U4PDZ7]	|
WBGene00005349	srh-132	|	21.299	|	Chemoreceptor;Chemoreceptor: Srh class	Serpentine Receptor, class H [Source:UniProtKB/TrEMBL;Acc:O45849]	|
WBGene00005464	srh-258	|	21.182	|	Chemoreceptor;Chemoreceptor: Srh class	Serpentine Receptor, class H [Source:UniProtKB/TrEMBL;Acc:O45761]	|
WBGene00005150	sre-2	|	21.131	|	Chemoreceptor;Chemoreceptor: Sre class	Serpentine receptor class epsilon-2 [Source:UniProtKB/Swiss-Prot;Acc:Q09273]	|
WBGene00005419	srh-209	|	20.828	|	Chemoreceptor;Chemoreceptor: Srh class	Serpentine Receptor, class H [Source:UniProtKB/TrEMBL;Acc:Q9XTR2]	|
WBGene00013629	srz-95	|	20.563	|	Chemoreceptor;Chemoreceptor: Srz class	Serpentine Receptor, class Z [Source:UniProtKB/TrEMBL;Acc:Q9XX65]	|
WBGene00013281	sre-27	|	20.3	|	Chemoreceptor;Chemoreceptor: Sre class	Serpentine receptor class epsilon-27 [Source:UniProtKB/Swiss-Prot;Acc:O62488]	|
WBGene00010797	srbc-75	|	20.023	|	Chemoreceptor;Chemoreceptor: Srbc class	Serpentine Receptor, class BC (Class B-like) [Source:UniProtKB/TrEMBL;Acc:O17957]	|
WBGene00011840	srbc-62	|	19.915	|	Chemoreceptor;Chemoreceptor: Srbc class	Serpentine Receptor, class BC (Class B-like) [Source:UniProtKB/TrEMBL;Acc:O45789]	|
WBGene00005562	sri-50	|	19.58	|	Chemoreceptor;Chemoreceptor: Sri class	Serpentine Receptor, class I [Source:UniProtKB/TrEMBL;Acc:Q95Q38]	|
WBGene00005433	srh-223	|	19.458	|	Chemoreceptor;Chemoreceptor: Srh class	Serpentine Receptor, class H [Source:UniProtKB/TrEMBL;Acc:Q20530]	|
WBGene00010530	srz-61	|	19.19	|	Chemoreceptor;Chemoreceptor: Srz class	Serpentine Receptor, class Z [Source:UniProtKB/TrEMBL;Acc:O45642]	|
WBGene00009242	sre-6	|	19.182	|	Chemoreceptor;Chemoreceptor: Sre class	Serpentine receptor class epsilon-6 [Source:UniProtKB/Swiss-Prot;Acc:Q19897]	|
WBGene00009566	srsx-1	|	19.114	|	Chemoreceptor;Chemoreceptor: Srsx class	Serpentine Receptor, class SX [Source:UniProtKB/TrEMBL;Acc:Q9XV30]	|
WBGene00005096	srd-18	|	18.996	|	Chemoreceptor;Chemoreceptor: Srd class	Serpentine receptor class delta-18 [Source:UniProtKB/Swiss-Prot;Acc:P92001]	|
WBGene00009298	srz-58	|	18.761	|	Chemoreceptor;Chemoreceptor: Srz class	Serpentine Receptor, class Z [Source:UniProtKB/TrEMBL;Acc:O45429]	|
WBGene00023462	srz-83	|	18.752	|	Chemoreceptor;Chemoreceptor: Srz class	Serpentine Receptor, class Z [Source:UniProtKB/TrEMBL;Acc:Q6A587]	|
WBGene00005398	srh-183	|	18.746	|	Chemoreceptor;Chemoreceptor: Srh class	Serpentine Receptor, class H [Source:UniProtKB/TrEMBL;Acc:Q9U200]	|
WBGene00005528	sri-16	|	18.305	|	Chemoreceptor;Chemoreceptor: Sri class	Serpentine Receptor, class I [Source:UniProtKB/TrEMBL;Acc:O62177]	|
WBGene00005439	srh-231	|	18.123	|	Chemoreceptor;Chemoreceptor: Srh class	Serpentine Receptor, class H [Source:UniProtKB/TrEMBL;Acc:O01450]	|
WBGene00005231	srh-5	|	18.042	|	Chemoreceptor;Chemoreceptor: Srh class	Serpentine Receptor, class H [Source:UniProtKB/TrEMBL;Acc:Q9TXK5]	|
WBGene00005173	srg-16	|	17.556	|	Chemoreceptor;Chemoreceptor: Srg class	Serpentine receptor class gamma-16 [Source:UniProtKB/Swiss-Prot;Acc:O17819]	|
WBGene00005527	sri-15	|	17.456	|	Chemoreceptor;Chemoreceptor: Sri class	Serpentine Receptor, class I [Source:UniProtKB/TrEMBL;Acc:O45372]	|
WBGene00013468	srz-96	|	17.262	|	Chemoreceptor;Chemoreceptor: Srz class	Serpentine Receptor, class Z [Source:UniProtKB/TrEMBL;Acc:Q9XXP7]	|
WBGene00005579	sri-67	|	17.193	|	Chemoreceptor;Chemoreceptor: Sri class	Serpentine Receptor, class I [Source:UniProtKB/TrEMBL;Acc:C6S3M3]	|
WBGene00005589	sri-77	|	17.115	|	Chemoreceptor;Chemoreceptor: Sri class	Serpentine Receptor, class I [Source:UniProtKB/TrEMBL;Acc:O16591]	|
WBGene00005395	srh-180	|	16.89	|	Chemoreceptor;Chemoreceptor: Srh class	Serpentine Receptor, class H [Source:UniProtKB/TrEMBL;Acc:Q9XU91]	|
WBGene00016925	srb-18	|	16.803	|	Chemoreceptor;Chemoreceptor: Srb class	Serpentine receptor class beta-18 [Source:UniProtKB/Swiss-Prot;Acc:O16444]	|
WBGene00005471	srh-265	|	16.772	|	Chemoreceptor;Chemoreceptor: Srh class	Serpentine Receptor, class H [Source:UniProtKB/TrEMBL;Acc:O45763]	|
WBGene00005938	srx-47	|	16.768	|	Chemoreceptor;Chemoreceptor: Srx class	Serpentine Receptor, class X [Source:UniProtKB/TrEMBL;Acc:Q19026]	|
WBGene00005654	srr-3	|	16.694	|	Chemoreceptor;Chemoreceptor: Srr class	Serpentine Receptor, class R [Source:UniProtKB/TrEMBL;Acc:O45459]	|
WBGene00005586	sri-74	|	16.486	|	Chemoreceptor;Chemoreceptor: Sri class	Serpentine Receptor, class I [Source:UniProtKB/TrEMBL;Acc:O44840]	|
WBGene00005530	sri-18	|	16.354	|	Chemoreceptor;Chemoreceptor: Sri class	Serpentine Receptor, class I [Source:UniProtKB/TrEMBL;Acc:O62413]	|
WBGene00005965	srx-74	|	16.122	|	Chemoreceptor;Chemoreceptor: Srx class	Serpentine Receptor, class X [Source:UniProtKB/TrEMBL;Acc:Q20285]	|
WBGene00005463	srh-257	|	16.044	|	Chemoreceptor;Chemoreceptor: Srh class	Serpentine Receptor, class H [Source:UniProtKB/TrEMBL;Acc:O45760]	|
WBGene00010261	srh-308	|	15.401	|	Chemoreceptor;Chemoreceptor: Srh class	Serpentine Receptor, class H [Source:UniProtKB/TrEMBL;Acc:G5EEZ7]	|
WBGene00005522	sri-10	|	15.401	|	Chemoreceptor;Chemoreceptor: Sri class	Serpentine Receptor, class I [Source:UniProtKB/TrEMBL;Acc:O45314]	|
WBGene00005726	srv-15	|	15.27	|	Chemoreceptor;Chemoreceptor: Srv class	Serpentine Receptor, class V [Source:UniProtKB/TrEMBL;Acc:Q9U306]	|
WBGene00016051	srt-27	|	15.21	|	Chemoreceptor;Chemoreceptor: Srt class	Serpentine Receptor, class T [Source:UniProtKB/TrEMBL;Acc:O76434]	|
WBGene00005582	sri-70	|	14.841	|	Chemoreceptor;Chemoreceptor: Sri class	Serpentine Receptor, class I [Source:UniProtKB/TrEMBL;Acc:O45967]	|
WBGene00011541	srbc-63	|	14.609	|	Chemoreceptor;Chemoreceptor: Srbc class	Serpentine Receptor, class BC (Class B-like) [Source:UniProtKB/TrEMBL;Acc:O62362]	|
WBGene00005216	srg-59	|	14.591	|	Chemoreceptor;Chemoreceptor: Srg class	Serpentine receptor class gamma [Source:UniProtKB/TrEMBL;Acc:O76435]	|
WBGene00005934	srx-43	|	14.505	|	Chemoreceptor;Chemoreceptor: Srx class	Serpentine receptor class X-43 [Source:UniProtKB/Swiss-Prot;Acc:O45767]	|
WBGene00005754	srw-7	|	14.185	|	Chemoreceptor;Chemoreceptor: Srw class	Serpentine Receptor, class W [Source:UniProtKB/TrEMBL;Acc:O01888]	|
WBGene00010220	sre-29	|	14.023	|	Chemoreceptor;Chemoreceptor: Sre class	Serpentine receptor class epsilon-29 [Source:UniProtKB/Swiss-Prot;Acc:O62269]	|
WBGene00005165	srg-7	|	13.601	|	Chemoreceptor;Chemoreceptor: Srg class	Serpentine receptor class gamma-7 [Source:UniProtKB/Swiss-Prot;Acc:P54129]	|
WBGene00005354	srh-137	|	13.191	|	Chemoreceptor;Chemoreceptor: Srh class	Serpentine Receptor, class H [Source:UniProtKB/TrEMBL;Acc:O62500]	|
WBGene00018826	srt-34	|	12.959	|	Chemoreceptor;Chemoreceptor: Srt class	Serpentine Receptor, class T [Source:UniProtKB/TrEMBL;Acc:Q9TXJ9]	|
WBGene00005476	srh-270	|	12.932	|	Chemoreceptor;Chemoreceptor: Srh class	Serpentine Receptor, class H [Source:UniProtKB/TrEMBL;Acc:O45162]	|
WBGene00011876	srz-6	|	12.883	|	Chemoreceptor;Chemoreceptor: Srz class	Serpentine Receptor, class Z [Source:UniProtKB/TrEMBL;Acc:O18098]	|
WBGene00005868	srw-121	|	12.611	|	Chemoreceptor;Chemoreceptor: Srw class	Serpentine Receptor, class W [Source:UniProtKB/TrEMBL;Acc:P91378]	|
WBGene00012724	sre-48	|	12.341	|	Chemoreceptor;Chemoreceptor: Sre class	Serpentine Receptor, class E (Epsilon) [Source:UniProtKB/TrEMBL;Acc:Q9U2J4]	|
WBGene00005667	sru-4	|	12.178	|	Chemoreceptor;Chemoreceptor: Sru class	Serpentine Receptor, class U [Source:UniProtKB/TrEMBL;Acc:Q18364]	|
WBGene00005388	srh-172	|	11.91	|	Chemoreceptor;Chemoreceptor: Srh class	Serpentine Receptor, class H [Source:UniProtKB/TrEMBL;Acc:Q9U1Z7]	|
WBGene00005421	srh-211	|	11.753	|	Chemoreceptor;Chemoreceptor: Srh class	Serpentine Receptor, class H [Source:UniProtKB/TrEMBL;Acc:A0A163VU50]	|
WBGene00005819	srw-72	|	11.307	|	Chemoreceptor;Chemoreceptor: Srw class	Serpentine Receptor, class W [Source:UniProtKB/TrEMBL;Acc:Q9XV86]	|
WBGene00005661	srr-10	|	11.287	|	Chemoreceptor;Chemoreceptor: Srr class	Serpentine Receptor, class R [Source:UniProtKB/TrEMBL;Acc:Q8IFZ2]	|
WBGene00005065	sra-39	|	11.175	|	Chemoreceptor;Chemoreceptor: Sra class	Serpentine receptor class alpha-39 [Source:UniProtKB/Swiss-Prot;Acc:O62420]	|
WBGene00005479	srh-274	|	11.126	|	Chemoreceptor;Chemoreceptor: Srh class	Serpentine Receptor, class H [Source:UniProtKB/TrEMBL;Acc:P91118]	|
WBGene00005529	sri-17	|	11.06	|	Chemoreceptor;Chemoreceptor: Sri class	Serpentine Receptor, class I [Source:UniProtKB/TrEMBL;Acc:O62176]	|
WBGene00016833	sre-51	|	11.036	|	Chemoreceptor;Chemoreceptor: Sre class	Serpentine Receptor, class E (Epsilon) [Source:UniProtKB/TrEMBL;Acc:A3QMA8]	|
WBGene00005489	srh-284	|	10.861	|	Chemoreceptor;Chemoreceptor: Srh class	Serpentine Receptor, class H [Source:UniProtKB/TrEMBL;Acc:O45305]	|
WBGene00005351	srh-134	|	10.811	|	Chemoreceptor;Chemoreceptor: Srh class	Serpentine Receptor, class H [Source:UniProtKB/TrEMBL;Acc:Q9GRY7]	|
WBGene00005172	srg-15	|	10.48	|	Chemoreceptor;Chemoreceptor: Srg class	Serpentine receptor class gamma-15 [Source:UniProtKB/Swiss-Prot;Acc:Q18428]	|
WBGene00015958	srbc-11	|	10.36	|	Chemoreceptor;Chemoreceptor: Srbc class	Serpentine Receptor, class BC (Class B-like) [Source:UniProtKB/TrEMBL;Acc:P91077]	|
WBGene00008489	srb-17	|	10.358	|	Chemoreceptor;Chemoreceptor: Srb class	Serpentine receptor class beta-17 [Source:UniProtKB/Swiss-Prot;Acc:O02241]	|
WBGene00005887	srw-140	|	10.335	|	Chemoreceptor;Chemoreceptor: Srw class	Serpentine Receptor, class W [Source:UniProtKB/TrEMBL;Acc:O16503]	|
WBGene00005761	srw-14	|	10.255	|	Chemoreceptor;Chemoreceptor: Srw class	Serpentine Receptor, class W [Source:UniProtKB/TrEMBL;Acc:G3MU50]	|
WBGene00005345	srh-128	|	10.17	|	Chemoreceptor;Chemoreceptor: Srh class	Serpentine Receptor, class H [Source:UniProtKB/TrEMBL;Acc:Q9TZD7]	|
WBGene00010590	srz-13	|	10.135	|	Chemoreceptor;Chemoreceptor: Srz class	Serpentine Receptor, class Z [Source:UniProtKB/TrEMBL;Acc:Q86D22]	|

## Sheet: Legend
Worm-ID	Name	|	Average expression (tpm)	|	Assigned neural function	Protein descritpion	|
Gene's identification using WormBase ID	Gene's identication		Contains the average normalized gene expression of FACSed ADL neurons from wild type animals		Only genes described as chemoreceptors in Robertson and Thomas, 2006 are listed	Description of corresponding protein for protein-coding genes
			Gene expression data are expressed as transcript per million (tpm)
			Only genes with an average expression > 10 tpm are listed
