# Supplementary material for: Impairing one sensory modality enhances another by reconfiguring peptidergic signalling in Caenorhabditis elegans
Source: eLife. 2022 Feb 24;11:e68040. doi: 10.7554/eLife.68040 (PMC8871372; doi:10.7554/eLife.68040)
Supplement: Supplementary file 3. [file elife-68040-supp3.xlsx]

## Sheet: Neuropeptide receptors
Worm-ID	Name	|	Average expression (tpm)	|	Assigned neural function	Gene description	|
WBGene00011372	npr-26	|	342.72	|	Neuropeptide receptors;Neuropeptide receptors: Somatostatin receptor receptor family	NeuroPeptide Receptor family [Source:UniProtKB/TrEMBL;Acc:A0A0K3AS23]	|
WBGene00013642	daf-38	|	158.895	|	Neuropeptide receptors;Neuropeptide receptors: Gonadotropin-releasing hormone receptor family	G-protein coupled receptor daf-38 [Source:UniProtKB/Swiss-Prot;Acc:Q9U320]	|
WBGene00014122	ZK863.1	|	148.238	|	Neuropeptide receptors;Neuropeptide receptors: Related family with no specific orthologs 2		|
WBGene00005860	srw-113	|	109.397	|	Chemoreceptor;Chemoreceptor: Srw class;Possible neuropeptide receptor;Possible neuropeptide receptor: Similar to:;Possible neuropeptide receptor: fly FMRFamide receptor	Serpentine Receptor, class W [Source:UniProtKB/TrEMBL;Acc:O45991]	|
WBGene00022824	ZK813.5	|	102.951	|	Neuropeptide receptors		|
WBGene00019774	M04G7.3	|	102.234	|	Neuropeptide receptors;Neuropeptide receptors: Related family with no specific orthologs 4		|
WBGene00020420	T10E10.3	|	89.751	|	Neuropeptide receptors;Neuropeptide receptors: Related family with no specific orthologs 1		|
WBGene00021510	frpr-19	|	81.318	|	Neuropeptide receptors;Neuropeptide receptors: Drosophila FMRFamide receptor family	FMRFamide Peptide Receptor family [Source:UniProtKB/TrEMBL;Acc:U4PC84]	|
WBGene00016761	tkr-2	|	67.051	|	Neuropeptide receptors;Neuropeptide receptors: Neurokinin/neuropeptide FF/orexin receptor family	TachyKinin Receptor family [Source:UniProtKB/TrEMBL;Acc:O44148]	|
WBGene00021328	npr-23	|	66.47	|	Neuropeptide receptors	NeuroPeptide Receptor family [Source:UniProtKB/TrEMBL;Acc:Q9N452]	|
WBGene00010329	F59D12.1	|	59.513	|	Neuropeptide receptors;Neuropeptide receptors: "DmDopEcR ortholog		|
WBGene00005841	srw-94	|	45.406	|	Chemoreceptor;Chemoreceptor: Srw class;Possible neuropeptide receptor;Possible neuropeptide receptor: Similar to:;Possible neuropeptide receptor: fly sex peptide receptor	Serpentine Receptor, class W [Source:UniProtKB/TrEMBL;Acc:Q9TXU9]	|
WBGene00018924	F56A11.4	|	42.699	|	Neuropeptide receptors;Neuropeptide receptors: Another Drosophila FMRFamide receptor family		|
WBGene00010143	F56A12.2	|	38.045	|	Neuropeptide receptors;Neuropeptide receptors: Related family with no specific orthologs 4		|
WBGene00019616	nmur-2	|	34.252	|	Neuropeptide receptors;Neuropeptide receptors: Ghrelin-obstatin/neuromedin U receptor family	NMUR (NeuroMedin U Receptor) homolog [Source:UniProtKB/TrEMBL;Acc:O17239]	|
WBGene00016984	npr-8	|	33.532	|	Neuropeptide receptors;Neuropeptide receptors: Neuropeptide F/Y receptor family	Probable G-protein coupled receptor npr-8 [Source:UniProtKB/Swiss-Prot;Acc:Q18904]	|
WBGene00003808	npr-2	|	30.833	|	Neuropeptide receptors;Neuropeptide receptors: Neuropeptide F/Y receptor family	NeuroPeptide Receptor family [Source:UniProtKB/TrEMBL;Acc:A0A061AKJ8]	|
WBGene00015299	C01F1.4	|	29.875	|	Neuropeptide receptors;Neuropeptide receptors: Related family with no specific orthologs 6		|
WBGene00018344	npr-27	|	28.912	|	Neuropeptide receptors;Neuropeptide receptors: Somatostatin receptor receptor family	NeuroPeptide Receptor family [Source:UniProtKB/TrEMBL;Acc:Q20325]	|
WBGene00005789	srw-42	|	27.244	|	Chemoreceptor;Chemoreceptor: Srw class;Possible neuropeptide receptor;Possible neuropeptide receptor: Similar to:;Possible neuropeptide receptor: fly sex peptide receptor	Serpentine Receptor, class W [Source:UniProtKB/TrEMBL;Acc:Q7YTN3]	|
WBGene00016747	nmur-1	|	26.67	|	Neuropeptide receptors;Neuropeptide receptors: Ghrelin-obstatin/neuromedin U receptor family	NMUR (NeuroMedin U Receptor) homolog; Neuromedin U receptor [Source:UniProtKB/TrEMBL;Acc:Q18701]	|
WBGene00021439	ckr-2	|	24.865	|	Neuropeptide receptors;Neuropeptide receptors: Gastrin-cholecystokinin receptor family	CholecystoKinin Receptor homolog [Source:UniProtKB/TrEMBL;Acc:G4SNP8]	|
WBGene00011578	npr-20	|	21.686	|	Neuropeptide receptors;Neuropeptide receptors: Ghrelin-obstatin/neuromedin U receptor family	NeuroPeptide Receptor family [Source:UniProtKB/TrEMBL;Acc:G5EFT1]	|
WBGene00020727	npr-21	|	19.978	|	Neuropeptide receptors;Neuropeptide receptors: Ghrelin-obstatin/neuromedin U receptor family	NeuroPeptide Receptor family [Source:UniProtKB/TrEMBL;Acc:O02043]	|
WBGene00016110	npr-11	|	19.59	|	Neuropeptide receptors;Neuropeptide receptors: Neuropeptide F/Y receptor family	Putative neuropeptide Y receptor 11 [Source:UniProtKB/Swiss-Prot;Acc:Q18179]	|
WBGene00007006	npr-3	|	19.198	|	Neuropeptide receptors;Neuropeptide receptors: Neuropeptide F/Y receptor family	NeuroPeptide Receptor family [Source:UniProtKB/TrEMBL;Acc:P90745]	|
WBGene00020524	dmsr-13	|	18.33	|	Neuropeptide receptors;Neuropeptide receptors: Drosophila Dromyosuppressin receptor family	DroMyoSuppressin Receptor related [Source:UniProtKB/TrEMBL;Acc:O17030]	|
WBGene00013883	npr-13	|	17.463	|	Neuropeptide receptors;Neuropeptide receptors: Neuropeptide F/Y receptor family	NeuroPeptide Receptor family [Source:UniProtKB/TrEMBL;Acc:Q23305]	|
WBGene00011709	T11F9.1	|	15.766	|	Neuropeptide receptors;Neuropeptide receptors: Another Drosophila FMRFamide receptor family		|
WBGene00007635	npr-4	|	15.549	|	Neuropeptide receptors;Neuropeptide receptors: Neuropeptide F/Y receptor family	NeuroPeptide Receptor family [Source:UniProtKB/TrEMBL;Acc:A0A078BTK0]	|
WBGene00008308	C54E10.3	|	15.375	|	Neuropeptide receptors;Neuropeptide receptors: Related family with no specific orthologs 2		|
WBGene00016570	gnrr-4	|	14.986	|	Neuropeptide receptors;Neuropeptide receptors: Gonadotropin-releasing hormone receptor family	GoNadotropin-Releasing hormone Receptor (GnRHR) related [Source:UniProtKB/TrEMBL;Acc:H2KZ99]	|
WBGene00011582	ntr-1	|	13.713	|	Neuropeptide receptors;Neuropeptide receptors: Related Vasopressin receptor family	Nematocin receptor 1 [Source:UniProtKB/Swiss-Prot;Acc:O02300]	|
WBGene00001175	egl-6	|	12.87	|	Neuropeptide receptors;Neuropeptide receptors: Drosophila Dromyosuppressin receptor family	G protein-coupled receptor EGL-6 isoform b [Source:UniProtKB/TrEMBL;Acc:G5EFX1]	|
WBGene00008065	npr-18	|	12.693	|	Neuropeptide receptors;Neuropeptide receptors: Somatostatin receptor receptor family	Neuropeptide receptor 18 [Source:UniProtKB/Swiss-Prot;Acc:Q09502]	|
WBGene00008808	ntr-2	|	12.426	|	Neuropeptide receptors;Neuropeptide receptors: Related Vasopressin receptor family	Nematocin receptor 2 [Source:UniProtKB/Swiss-Prot;Acc:O62169]	|
WBGene00012962	dmsr-5	|	11.937	|	Neuropeptide receptors;Neuropeptide receptors: Drosophila Dromyosuppressin receptor family	DroMyoSuppressin Receptor related [Source:UniProtKB/TrEMBL;Acc:Q9XXD5]	|
WBGene00015735	pdfr-1	|	11.647	|	Neuropeptide receptors;Neuropeptide receptors: Class B (secretin-type)	Calcitonin receptor-like protein 1 [Source:UniProtKB/Swiss-Prot;Acc:Q09460]	|
WBGene00005776	srw-29	|	11.157	|	Chemoreceptor;Chemoreceptor: Srw class;Possible neuropeptide receptor;Possible neuropeptide receptor: Similar to:;Possible neuropeptide receptor: fly peptide receptor GPCR	Serpentine Receptor, class W [Source:UniProtKB/TrEMBL;Acc:Q9XV61]	|
WBGene00020069	R13H7.2	|	11.031	|	Neuropeptide receptors;Neuropeptide receptors: Related family with no specific orthologs 1		|
WBGene00007614	gnrr-2	|	10.975	|	Neuropeptide receptors;Neuropeptide receptors: Gonadotropin-releasing hormone receptor family	GoNadotropin-Releasing hormone Receptor (GnRHR) related [Source:UniProtKB/TrEMBL;Acc:Q9XVS5]	|
WBGene00010735	frpr-15	|	10.71	|	Neuropeptide receptors;Neuropeptide receptors: Drosophila FMRFamide receptor family	FMRFamide Peptide Receptor family [Source:UniProtKB/TrEMBL;Acc:Q21413]	|

## Sheet: Legend
Worm-ID	Name	|	Average expression (tpm)	|	Assigned neural function	Protein descritpion	|
Gene's identification using WormBase ID	Gene's identication		Contains the average normalized gene expression of FACSed ADL neurons from wild type animals		Only genes described as "Neuropeptide receptors" according to Hobert, 2013 are listed	Description of corresponding protein for protein-coding genes
			Gene expression data are expressed as transcript per million (tpm)
			Only genes with an average expression > 10 tpm are listed
