# Supplementary material for: Impairing one sensory modality enhances another by reconfiguring peptidergic signalling in Caenorhabditis elegans
Source: eLife. 2022 Feb 24;11:e68040. doi: 10.7554/eLife.68040 (PMC8871372; doi:10.7554/eLife.68040)
Supplement: Supplementary file 4. [file elife-68040-supp4.xlsx]

## Sheet: Neuropeptides
Worm-ID	Name	|	Average expression WT (tpm)	|	Assigned neural function	Gene descritpion	|
WBGene00015354	snet-1	|	22940.1	|	Neuropeptide;Neuropeptide: Neuropeptide-like proteins		|
WBGene00010575	flp-25	|	2537.87	|	Neuropeptide;Neuropeptide: FMRFamides (31 flp genes)	FMRF-Like Peptide [Source:UniProtKB/TrEMBL;Acc:Q6LAC9]	|
WBGene00001447	flp-4	|	2178.64	|	Neuropeptide;Neuropeptide: FMRFamides (31 flp genes)	FMRF-Like Peptide; FMRFamide-like peptide 4 [Source:UniProtKB/TrEMBL;Acc:G5EG31]	|
WBGene00002115	ins-32	|	1217.07	|	Neuropeptide;Neuropeptide: Insulin-related peptides	INSulin related [Source:UniProtKB/TrEMBL;Acc:Q9TYK2]	|
WBGene00017813	nlp-61	|	1000.92	|	Neuropeptide;Neuropeptide: Neuropeptide-like proteins	Neuropeptide-Like Protein [Source:UniProtKB/TrEMBL;Acc:Q19806]	|
WBGene00044028	nlp-63	|	762.319	|	Neuropeptide;Neuropeptide: Neuropeptide-like proteins	Neuropeptide-Like Protein [Source:UniProtKB/TrEMBL;Acc:Q5FC76]	|
WBGene00002097	ins-14	|	707.822	|	Neuropeptide;Neuropeptide: Insulin-related peptides	INSulin related [Source:UniProtKB/TrEMBL;Acc:Q7JP82]	|
WBGene00003756	nlp-18	|	620.454	|	Neuropeptide;Neuropeptide: Neuropeptide-like proteins	Neuropeptide-Like Protein [Source:UniProtKB/TrEMBL;Acc:O62211]	|
WBGene00001448	flp-5	|	546.223	|	Neuropeptide;Neuropeptide: FMRFamides (31 flp genes)	FMRFamide-like neuropeptides 5 APKPKFIRF-amide AGAKFIRF-amide GAKFIRF-amide [Source:UniProtKB/Swiss-Prot;Acc:O61466]	|
WBGene00018298	nlp-50	|	482.479	|	Neuropeptide;Neuropeptide: Neuropeptide-like proteins	Neuropeptide-Like Protein [Source:UniProtKB/TrEMBL;Acc:Q20295]	|
WBGene00003745	nlp-7	|	467.741	|	Neuropeptide;Neuropeptide: Neuropeptide-like proteins	Neuropeptide-like protein 7 [Source:UniProtKB/Swiss-Prot;Acc:Q19569]	|
WBGene00003759	nlp-21	|	399.418	|	Neuropeptide;Neuropeptide: Neuropeptide-like proteins	Neuropeptide-Like Protein [Source:UniProtKB/TrEMBL;Acc:Q9XX02]	|
WBGene00015514	nlp-77	|	370.952	|	Neuropeptide;Neuropeptide: Neuropeptide-like proteins	Neuropeptide-Like Protein [Source:UniProtKB/TrEMBL;Acc:Q17698]	|
WBGene00003752	nlp-14	|	369	|	Neuropeptide;Neuropeptide: Neuropeptide-like proteins	Neuropeptide-Like Protein [Source:UniProtKB/TrEMBL;Acc:H2KYR6]	|
WBGene00001459	flp-16	|	323.403	|	Neuropeptide;Neuropeptide: FMRFamides (31 flp genes)	FMRFamide-like neuropeptides 16 AQTFVRF-amide 1 AQTFVRF-amide 2 GQTFVRF-amide [Source:UniProtKB/Swiss-Prot;Acc:Q7YX32]	|
WBGene00001457	flp-14	|	292.613	|	Neuropeptide;Neuropeptide: FMRFamides (31 flp genes)	FMRFamide-like neuropeptides 14 KHEYLRF-amide 1 KHEYLRF-amide 2 KHEYLRF-amide 3 KHEYLRF-amide 4 [Source:UniProtKB/Swiss-Prot;Acc:Q9XWV7]	|
WBGene00003748	nlp-10	|	254.969	|	Neuropeptide;Neuropeptide: Neuropeptide-like proteins	Neuropeptide-Like Protein [Source:UniProtKB/TrEMBL;Acc:Q20114]	|
WBGene00019975	flp-34	|	222.908	|	Neuropeptide;Neuropeptide: FMRFamides (31 flp genes)	FMRF-Like Peptide [Source:UniProtKB/TrEMBL;Acc:A0A0K3AST3]	|
WBGene00008820	nlp-55	|	212.939	|	Neuropeptide;Neuropeptide: Neuropeptide-like proteins	Neuropeptide-Like Protein [Source:UniProtKB/TrEMBL;Acc:Q19465]	|
WBGene00003746	nlp-8	|	198.934	|	Neuropeptide;Neuropeptide: Neuropeptide-like proteins	Neuropeptide-Like Protein [Source:UniProtKB/TrEMBL;Acc:Q93409]	|
WBGene00017236	nlp-60	|	196.481	|	Neuropeptide;Neuropeptide: Neuropeptide-like proteins	Neuropeptide-Like Protein [Source:UniProtKB/TrEMBL;Acc:Q19195]	|
WBGene00012440	nlp-53	|	173.895	|	Neuropeptide;Neuropeptide: Neuropeptide-like proteins	Neuropeptide-Like Protein [Source:UniProtKB/TrEMBL;Acc:Q9XXJ3]	|
WBGene00000920	daf-28	|	165.459	|	Neuropeptide;Neuropeptide: Insulin-related peptides		|
WBGene00011678	T10B9.9	|	159.648	|	Neuropeptide;Neuropeptide: Neuropeptide-like proteins		|
WBGene00001452	flp-9	|	144.669	|	Neuropeptide;Neuropeptide: FMRFamides (31 flp genes)	FMRFamide-like neuropeptides 9 KPSFVRF-amide 1 KPSFVRF-amide 2 [Source:UniProtKB/Swiss-Prot;Acc:Q18502]	|
WBGene00003771	nlp-33	|	132.625	|	Neuropeptide;Neuropeptide: Neuropeptide-like proteins	Neuropeptide-like protein 33 [Source:UniProtKB/Swiss-Prot;Acc:Q95ZN4]	|
WBGene00045386	nlp-76	|	119.046	|	Neuropeptide;Neuropeptide: Neuropeptide-like proteins	Neuropeptide-Like Protein [Source:UniProtKB/TrEMBL;Acc:A5JYR5]	|
WBGene00002099	ins-16	|	107.178	|	Neuropeptide;Neuropeptide: Insulin-related peptides	INSulin related [Source:UniProtKB/TrEMBL;Acc:Q7KX46]	|
WBGene00020317	pdf-1	|	91.902	|	Neuropeptide;Neuropeptide: Neuropeptide-like proteins	PDF (Arthropod Pigment Dispersing Factor) homolog [Source:UniProtKB/TrEMBL;Acc:G8JYC6]	|
WBGene00018117	nlp-47	|	83.831	|	Neuropeptide;Neuropeptide: Neuropeptide-like proteins	Neuropeptide-Like Protein [Source:UniProtKB/TrEMBL;Acc:O76722]	|
WBGene00003765	nlp-27	|	82.396	|	Neuropeptide;Neuropeptide: Neuropeptide-like proteins	Neuropeptide-Like Protein [Source:UniProtKB/TrEMBL;Acc:O44666]	|
WBGene00002109	ins-26	|	75.16	|	Neuropeptide;Neuropeptide: Insulin-related peptides	INSulin related [Source:UniProtKB/TrEMBL;Acc:Q9XUI9]	|
WBGene00001458	flp-15	|	69.726	|	Neuropeptide;Neuropeptide: FMRFamides (31 flp genes)	FMRF-Like Peptide [Source:UniProtKB/TrEMBL;Acc:O46023]	|
WBGene00011227	nlp-67	|	67.23	|	Neuropeptide;Neuropeptide: Neuropeptide-like proteins	Neuropeptide-Like Protein [Source:UniProtKB/TrEMBL;Acc:O62346]	|
WBGene00002120	ins-37	|	66.08	|	Neuropeptide;Neuropeptide: Insulin-related peptides	INSulin related [Source:UniProtKB/TrEMBL;Acc:Q9XVA1]	|
WBGene00010982	flp-32	|	54.091	|	Neuropeptide;Neuropeptide: FMRFamides (31 flp genes)	FMRF-Like Peptide [Source:UniProtKB/TrEMBL;Acc:Q21656]	|
WBGene00019734	nlp-64	|	53.905	|	Neuropeptide;Neuropeptide: Neuropeptide-like proteins	Neuropeptide-Like Protein [Source:UniProtKB/TrEMBL;Acc:Q95Q46]	|
WBGene00002089	ins-6	|	47.338	|	Neuropeptide;Neuropeptide: Insulin-related peptides	Probable insulin-like peptide beta-type 5 [Source:UniProtKB/Swiss-Prot;Acc:P56174]	|
WBGene00001455	flp-12	|	40.744	|	Neuropeptide;Neuropeptide: FMRFamides (31 flp genes)	FMRF-Like Peptide; FMRFamide-like peptide 12 [Source:UniProtKB/TrEMBL;Acc:G5EBV5]	|
WBGene00011141	nlp-66	|	37.331	|	Neuropeptide;Neuropeptide: Neuropeptide-like proteins	Neuropeptide-Like Protein [Source:UniProtKB/TrEMBL;Acc:Q7YWW1]	|
WBGene00016114	flp-27	|	36.719	|	Neuropeptide;Neuropeptide: FMRFamides (31 flp genes)	FMRFamide-like neuropeptides 27 EASAFGDIIGELKGKGLGGRMRF-amide [Source:UniProtKB/Swiss-Prot;Acc:Q18184]	|
WBGene00001462	flp-19	|	36.046	|	Neuropeptide;Neuropeptide: FMRFamides (31 flp genes)	FMRFamide-like neuropeptides 19 WANQVRF-amide [Source:UniProtKB/Swiss-Prot;Acc:Q9XVX1]	|
WBGene00077775	nlp-58	|	35.715	|	Neuropeptide;Neuropeptide: Neuropeptide-like proteins	Neuropeptide-Like Protein [Source:UniProtKB/TrEMBL;Acc:B3WFV5]	|
WBGene00003766	nlp-28	|	33.423	|	Neuropeptide;Neuropeptide: Neuropeptide-like proteins	Neuropeptide-like protein 28 QWGYGGY-amide GYGGYGGY-amide GMYGGY-amide GMYGGW-amide [Source:UniProtKB/Swiss-Prot;Acc:O44665]	|
WBGene00001451	flp-8	|	30.44	|	Neuropeptide;Neuropeptide: FMRFamides (31 flp genes)	FMRF-Like Peptide [Source:UniProtKB/TrEMBL;Acc:Q8WQF5]	|
WBGene00002113	ins-30	|	28.79	|	Neuropeptide;Neuropeptide: Insulin-related peptides	INSulin related [Source:UniProtKB/TrEMBL;Acc:Q9XUI8]	|
WBGene00002102	ins-19	|	28.677	|	Neuropeptide;Neuropeptide: Insulin-related peptides	INSulin related [Source:UniProtKB/TrEMBL;Acc:Q71UE4]	|
WBGene00001464	flp-21	|	28.595	|	Neuropeptide;Neuropeptide: FMRFamides (31 flp genes)	FMRF-Like Peptide [Source:UniProtKB/TrEMBL;Acc:Q18234]	|
WBGene00002105	ins-22	|	28.562	|	Neuropeptide;Neuropeptide: Insulin-related peptides	Probable insulin-like peptide alpha-type 2 [Source:UniProtKB/Swiss-Prot;Acc:Q21508]	|
WBGene00044006	nlp-82	|	26.403	|	Neuropeptide;Neuropeptide: Neuropeptide-like proteins	Neuropeptide-Like Protein [Source:UniProtKB/TrEMBL;Acc:G5EGM0]	|
WBGene00022276	nlp-40	|	25.588	|	Neuropeptide;Neuropeptide: Neuropeptide-like proteins	Neuropeptide-like peptides nlp-40 Peptide P1 Peptide P2 Peptide P3 Peptide P4 [Source:UniProtKB/Swiss-Prot;Acc:Q9N4D8]	|
WBGene00020229	T05A8.3	|	24.796	|	Neuropeptide;Neuropeptide: Neuropeptide-like proteins		|
WBGene00002111	ins-28	|	24.74	|	Neuropeptide;Neuropeptide: Insulin-related peptides	INSulin related [Source:UniProtKB/TrEMBL;Acc:Q7JKM9]	|
WBGene00001460	flp-17	|	22.702	|	Neuropeptide;Neuropeptide: FMRFamides (31 flp genes)	FMRF-Like Peptide [Source:UniProtKB/TrEMBL;Acc:A3QM96]	|
WBGene00001449	flp-6	|	22.194	|	Neuropeptide;Neuropeptide: FMRFamides (31 flp genes)	FMRFamide-like neuropeptides 6 QQDSEVEREMM KSAYMRF-amide 1 KSAYMRF-amide 2 KSAYMRF-amide 3 KSAYMRF-amide 4 KSAYMRF-amide 5 KSAYMRF-amide 6 [Source:UniProtKB/Swiss-Prot;Acc:Q19165]	|
WBGene00001454	flp-11	|	21.143	|	Neuropeptide;Neuropeptide: FMRFamides (31 flp genes)	FMRFamide-like neuropeptides 11 AMRNALVRF-amide ASGGMRNALVRF-amide SPLDEEDFAPESPLQ-amide NGAPQPFVRF-amide [Source:UniProtKB/Swiss-Prot;Acc:Q21156]	|
WBGene00003754	nlp-16	|	21.043	|	Neuropeptide;Neuropeptide: Neuropeptide-like proteins	Neuropeptide-Like Protein [Source:UniProtKB/TrEMBL;Acc:V6CJ99]	|
WBGene00013334	nlp-56	|	19.307	|	Neuropeptide;Neuropeptide: Neuropeptide-like proteins	Neuropeptide-Like Protein [Source:UniProtKB/TrEMBL;Acc:H2FLM4]	|
WBGene00003753	nlp-15	|	18.553	|	Neuropeptide;Neuropeptide: Neuropeptide-like proteins	Neuropeptide-Like Protein [Source:UniProtKB/TrEMBL;Acc:G5EGN6]	|
WBGene00001450	flp-7	|	18.492	|	Neuropeptide;Neuropeptide: FMRFamides (31 flp genes)	FMRFamide-like neuropeptides 7 TPMQRSSMVRF-amide 1 SPMQRSSMVRF-amide 1 SPMQRSSMVRF-amide 2 SPMQRSSMVRF-amide 3 SPMERSAMVRF-amide SPMDRSKMVRF-amide SSIDRASMVRL-amide TPMQRSSMVRF-amide 2 [Source:UniProtKB/Swiss-Prot;Acc:G5EEC2]	|
WBGene00001444	flp-1	|	18.052	|	Neuropeptide;Neuropeptide: FMRFamides (31 flp genes)	FMRFamide-like neuropeptides 1 PNFMRY-amide AGSDPNFLRF-amide SQPNFLRF-amide ASGDPNFLRF-amide SDPNFLRF-amide AAADPNFLRF-amide SADPNFLRF-amide PNFLRF-amide [Source:UniProtKB/Swiss-Prot;Acc:P41855]	|
WBGene00022254	nlp-71	|	17.976	|	Neuropeptide;Neuropeptide: Neuropeptide-like proteins	Neuropeptide-Like Protein [Source:UniProtKB/TrEMBL;Acc:V6CLM5]	|
WBGene00003741	nlp-3	|	17.65	|	Neuropeptide;Neuropeptide: Neuropeptide-like proteins	Neuropeptide-Like Protein [Source:UniProtKB/TrEMBL;Acc:Q93745]	|
WBGene00007185	nlp-36	|	17.437	|	Neuropeptide;Neuropeptide: Neuropeptide-like proteins	Neuropeptide-like peptide 36 [Source:UniProtKB/Swiss-Prot;Acc:Q03561]	|
WBGene00003742	nlp-4	|	17.413	|	Neuropeptide;Neuropeptide: Neuropeptide-like proteins	Neuropeptide-Like Protein [Source:UniProtKB/TrEMBL;Acc:Q93832]	|
WBGene00002101	ins-18	|	16.372	|	Neuropeptide;Neuropeptide: Insulin-related peptides	Ceinsulin-1; INSulin related [Source:UniProtKB/TrEMBL;Acc:G5ECC6]	|
WBGene00003751	nlp-13	|	15.852	|	Neuropeptide;Neuropeptide: Neuropeptide-like proteins	Neuropeptide-Like Protein [Source:UniProtKB/TrEMBL;Acc:O44540]	|
WBGene00002116	ins-33	|	15.384	|	Neuropeptide;Neuropeptide: Insulin-related peptides	INSulin related [Source:UniProtKB/TrEMBL;Acc:Q9U333]	|
WBGene00002086	ins-3	|	14.988	|	Neuropeptide;Neuropeptide: Insulin-related peptides	Probable insulin-like peptide beta-type 3 [Source:UniProtKB/Swiss-Prot;Acc:Q09628]	|
WBGene00008626	nlp-79	|	14.806	|	Neuropeptide;Neuropeptide: Neuropeptide-like proteins	Neuropeptide-Like Protein [Source:UniProtKB/TrEMBL;Acc:Q7YTR0]	|
WBGene00195143	nlp-78	|	14.596	|	Neuropeptide;Neuropeptide: Neuropeptide-like proteins	Neuropeptide-Like Protein [Source:UniProtKB/TrEMBL;Acc:D6VPA4]	|
WBGene00003744	nlp-6	|	13.41	|	Neuropeptide;Neuropeptide: Neuropeptide-like proteins	Neuropeptide-Like Protein [Source:UniProtKB/TrEMBL;Acc:H2KZS6]	|
WBGene00002092	ins-9	|	12.718	|	Neuropeptide;Neuropeptide: Insulin-related peptides	INSulin related [Source:UniProtKB/TrEMBL;Acc:Q7JP91]	|
WBGene00021268	capa-1	|	12.57	|	Neuropeptide;Neuropeptide: Neuropeptide-like proteins	CAPA (Insect neuropeptide) related [Source:UniProtKB/TrEMBL;Acc:Q9N563]	|
WBGene00003755	nlp-17	|	12.48	|	Neuropeptide;Neuropeptide: Neuropeptide-like proteins	Neuropeptide-Like Protein [Source:UniProtKB/TrEMBL;Acc:O62455]	|
WBGene00003767	nlp-29	|	12.133	|	Neuropeptide;Neuropeptide: Neuropeptide-like proteins	Neuropeptide-like protein 29 QWGYGGY-amide GYGGYGGY-amide GMYGGY-amide GMYGGW-amide [Source:UniProtKB/Swiss-Prot;Acc:O44664]	|
WBGene00002119	ins-36	|	12.078	|	Neuropeptide;Neuropeptide: Insulin-related peptides	INSulin related [Source:UniProtKB/TrEMBL;Acc:Q7K6X2]	|
WBGene00002107	ins-24	|	11.632	|	Neuropeptide;Neuropeptide: Insulin-related peptides	INSulin related [Source:UniProtKB/TrEMBL;Acc:Q9U1P6]	|
WBGene00019160	nlp-49	|	10.551	|	Neuropeptide;Neuropeptide: Neuropeptide-like proteins	Corticotrophin Releasing Factor related [Source:UniProtKB/TrEMBL;Acc:Q95YA3]	|
WBGene00001446	flp-3	|	10.545	|	Neuropeptide;Neuropeptide: FMRFamides (31 flp genes)	FMRFamide-like neuropeptides 3 SPLGTMRF-amide TPLGTMRF-amide SAEPFGTMRF-amide NPENDTPFGTMRF-amide ASEDALFGTMRF-amide EAEEPLGTMRF-amide SADDSAPFGTMRF-amide NPLGTMRF-amide [Source:UniProtKB/Swiss-Prot;Acc:Q23212]	|

## Sheet: Legend
Worm-ID	Name	|	Average expression (tpm)	|	Assigned neural function	Protein descritpion	|
Gene's identification using WormBase ID	Gene's identication		Contains the average normalized gene expression of FACSed ADL neurons from wild type animals		Only genes described as "Neuropeptide" according to Hobert, 2006 are listed	Description of corresponding protein for protein-coding genes
			Gene expression data are expressed as transcript per million (tpm)
			Only genes with an average expression > 10 tpm are listed
