# Supplementary material for: Impairing one sensory modality enhances another by reconfiguring peptidergic signalling in Caenorhabditis elegans
Source: eLife. 2022 Feb 24;11:e68040. doi: 10.7554/eLife.68040 (PMC8871372; doi:10.7554/eLife.68040)
Supplement: Supplementary file 5. [file elife-68040-supp5.xlsx]

## Sheet: Differentially regulated genes
Worm-ID	Name	Average expression WT (tpm)	Average expression qui-1 (tpm)	|	Assigned neural function	Gene descritpion	|	log2FC	p-valule	q-value
WBGene00005756	srw-9	0.121	75.015	|	Chemoreceptor;Chemoreceptor: Srw class	Serpentine Receptor, class W [Source:UniProtKB/TrEMBL;Acc:Q86D06]	|	9.34769	5.44e-78	5.88e-75
WBGene00011899	nlp-68	5.97	3116.51	|	Neuropeptide;Neuropeptide: Neuropeptide-like proteins	Neuropeptide-like protein 68 [Source:UniProtKB/Swiss-Prot;Acc:Q22634]	|	9.20148	3.04e-122	7.49e-119
WBGene00011979	T24B8.5	0.066	45.871	|			|	9.04954	1.17e-23	1.22e-21
WBGene00044998	M199.9	0	69.966	|			|	8.55637	1.66e-17	9.71e-16
WBGene00005757	srw-10	0.084	20.336	|	Chemoreceptor;Chemoreceptor: Srw class	Serpentine Receptor, class W [Source:UniProtKB/TrEMBL;Acc:O18277]	|	8.11536	1.88e-37	4.1e-35
WBGene00044679	K02B12.9	91.081	15201.1	|			|	7.55147	1.71e-107	2.69e-104
WBGene00002094	ins-11	6.5	581.113	|	Neuropeptide;Neuropeptide: Insulin-related peptides	Probable insulin-like peptide gamma-type 1 B-chain-like peptide A-chain-like peptide [Source:UniProtKB/Swiss-Prot;Acc:Q18060]	|	6.68313	1.33e-111	2.54e-108
WBGene00013942	ZK218.8	0.151	13.857	|			|	6.67035	5.54e-13	1.92e-11
WBGene00019293	K02A6.2	32.092	2692.45	|			|	6.54907	5.58e-130	1.61e-126
WBGene00008287	C54C6.5	2.975	231.588	|			|	6.48802	6.37e-74	6.47e-71
WBGene00013389	Y62H9A.1	2.351	185.757	|			|	6.45302	4.2e-96	5.59e-93
WBGene00019623	K10C9.1	4.174	216.859	|			|	5.90918	7.43e-46	2.33e-43
WBGene00005411	srh-200	1.563	73.88	|	Chemoreceptor;Chemoreceptor: Srh class	Serpentine Receptor, class H [Source:UniProtKB/TrEMBL;Acc:P91219]	|	5.70155	1.33e-34	2.48e-32
WBGene00013390	Y62H9A.2	0.263	12.364	|			|	5.64657	2.26e-18	1.39e-16
WBGene00003828	nuc-1	3.331	125.362	|		Deoxyribonuclease-2 [Source:UniProtKB/Swiss-Prot;Acc:Q17778]	|	5.41226	1.17e-243	2.03e-239
WBGene00015072	srt-69	0.408	15.505	|	Chemoreceptor;Chemoreceptor: Srt class	Serpentine Receptor, class T [Source:UniProtKB/TrEMBL;Acc:O16489]	|	5.38874	4.02e-30	6.2e-28
WBGene00044643	H17B01.5	16.907	626.066	|			|	5.37919	5.08e-187	2.93e-183
WBGene00014981	ZK218.9	0.68	25.023	|			|	5.3755	2.08e-12	6.77e-11
WBGene00003605	nhr-6	5.027	173.725	|		Nuclear hormone receptor family member nhr-6 [Source:UniProtKB/Swiss-Prot;Acc:P41829]	|	5.25717	2.77e-14	1.14e-12
WBGene00022004	npr-22	0.45	15.202	|	Neuropeptide receptors;Neuropeptide receptors: Neurokinin/neuropeptide FF/orexin receptor family	Neuropeptide receptor 22 [Source:UniProtKB/Swiss-Prot;Acc:Q59E83]	|	5.19498	3.03e-09	6.15e-08
WBGene00219498	Y106G6E.8	0.796	33.003	|			|	5.02635	0.000254	0.00155
WBGene00009779	F46C5.2	1.191	32.443	|			|	4.93864	9.57e-24	1.01e-21
WBGene00009725	F45E6.1	7.863	202.696	|			|	4.86856	2.11e-73	1.92e-70
WBGene00006218	str-174	0.667	16.648	|		Seven TM Receptor [Source:UniProtKB/TrEMBL;Acc:D3KZG5]	|	4.7705	1.03e-18	6.76e-17
WBGene00001464	flp-21	28.595	636.602	|	Neuropeptide;Neuropeptide: FMRFamides (31 flp genes)	FMRF-Like Peptide [Source:UniProtKB/TrEMBL;Acc:Q18234]	|	4.65796	1.81e-165	7.84e-162
WBGene00010953	clec-190	0.659	14.53	|		C-type LECtin [Source:UniProtKB/TrEMBL;Acc:Q9NAP0]	|	4.62651	6.03e-09	1.16e-07
WBGene00019764	M03F8.5	1.673	34.73	|			|	4.55068	9.55e-117	2.06e-113
WBGene00011424	dhs-31	0.591	11.664	|		DeHydrogenases, Short chain [Source:UniProtKB/TrEMBL;Acc:D3KFT5]	|	4.48004	2.33e-20	1.81e-18
WBGene00003245	mig-13	1.768	32.03	|	Auxiliary subunit for:: AMPA-type Glu receptors (TARPs);Auxiliary subunit for:: nAChR LGIC	Abnormal cell migration protein 13 [Source:UniProtKB/Swiss-Prot;Acc:G5EF33]	|	4.35803	1.42e-51	5.82e-49
WBGene00001864	him-5	3.775	67.387	|		High Incidence of Males (Increased X chromosome loss) [Source:UniProtKB/TrEMBL;Acc:O17724]	|	4.32687	1.27e-58	6.64e-56
WBGene00012093	T27E7.9	1.844	31.986	|			|	4.2101	3.22e-05	0.00026
WBGene00006112	str-47	1.494	24.178	|		Seven TM Receptor [Source:UniProtKB/TrEMBL;Acc:P91217]	|	4.15399	1.2e-24	1.34e-22
WBGene00008392	D1086.5	28.895	459.104	|			|	4.14993	2.14e-50	8.22e-48
WBGene00022440	Y110A2AL.3	1.305	20.349	|			|	4.13531	0.0123	0.0398
WBGene00012088	T27E7.3	20.176	321.558	|			|	4.12045	9.91e-07	1.18e-05
WBGene00002149	irk-1	0.792	11.777	|	Potassium Channel;Potassium Channel: K family	Inward rectifier potassium channel irk-1 [Source:UniProtKB/Swiss-Prot;Acc:P52192]	|	4.05376	2.23e-35	4.38e-33
WBGene00010499	K02B12.6	1.485	21.413	|			|	4.03967	1.42e-16	7.57e-15
WBGene00013856	ZC168.2	335.457	4789.69	|			|	3.99839	6.55e-54	2.98e-51
WBGene00043058	sre-34	25.933	363.345	|	Chemoreceptor;Chemoreceptor: Sre class	Serpentine Receptor, class E (Epsilon) [Source:UniProtKB/TrEMBL;Acc:Q5WRM6]	|	3.96747	1.8e-57	9.13e-55
WBGene00015048	faah-2	4.805	66.659	|		Fatty Acid Amide Hydrolase homolog [Source:UniProtKB/TrEMBL;Acc:Q17447]	|	3.94435	5.78e-29	8.38e-27
WBGene00014127	ZK892.3	1.378	17.605	|			|	3.84664	8.67e-40	2.11e-37
WBGene00006929	vit-5	2.973	38.968	|		Vitellogenin-5 [Source:UniProtKB/Swiss-Prot;Acc:P06125]	|	3.84063	6.91e-22	6.09e-20
WBGene00005877	srw-130	2.748	34.199	|	Chemoreceptor;Chemoreceptor: Srw class	Serpentine Receptor, class W [Source:UniProtKB/TrEMBL;Acc:O61945]	|	3.80644	4.31e-70	3.24e-67
WBGene00007950	C35A5.6	5.218	58.729	|			|	3.65711	3.92e-53	1.72e-50
WBGene00005096	srd-18	18.996	214.263	|	Chemoreceptor;Chemoreceptor: Srd class	Serpentine receptor class delta-18 [Source:UniProtKB/Swiss-Prot;Acc:P92001]	|	3.65499	5.51e-47	1.8e-44
WBGene00006927	vit-3	1.726	19.822	|		Vitellogenin-3 [Source:UniProtKB/Swiss-Prot;Acc:Q9N4J2]	|	3.64886	4.69e-09	9.18e-08
WBGene00003474	mtl-2	6.768	76.143	|		Metallothionein-2 [Source:UniProtKB/Swiss-Prot;Acc:P17512]	|	3.63845	1.37e-14	5.79e-13
WBGene00006679	twk-26	1.196	13.382	|	Potassium Channel;Potassium Channel: TWK Channel family	TWiK family of potassium channels [Source:UniProtKB/TrEMBL;Acc:Q21467]	|	3.63192	1.63e-26	2.05e-24
WBGene00005441	srh-234	25.439	277.676	|	Chemoreceptor;Chemoreceptor: Srh class	Serpentine Receptor, class H [Source:UniProtKB/TrEMBL;Acc:Q9GS03]	|	3.60794	1.67e-42	4.66e-40
WBGene00045024	C43F9.11	13.067	137.993	|			|	3.55746	5.02e-35	9.64e-33
WBGene00005582	sri-70	14.841	155.021	|	Chemoreceptor;Chemoreceptor: Sri class	Serpentine Receptor, class I [Source:UniProtKB/TrEMBL;Acc:O45967]	|	3.55535	1.25e-108	2.16e-105
WBGene00013479	Y69H2.1	2.006	19.971	|			|	3.50393	4.94e-19	3.37e-17
WBGene00005444	srh-237	9.792	96.441	|	Chemoreceptor;Chemoreceptor: Srh class	Serpentine Receptor, class H [Source:UniProtKB/TrEMBL;Acc:J7SA46]	|	3.47428	4.94e-61	2.75e-58
WBGene00018758	F53E10.1	3.069	28.626	|			|	3.39388	1.75e-34	3.22e-32
WBGene00016519	srz-56	62.68	586.891	|	Chemoreceptor;Chemoreceptor: Srz class	Serpentine Receptor, class Z [Source:UniProtKB/TrEMBL;Acc:Q9N5W5]	|	3.37755	4.63e-35	8.98e-33
WBGene00005233	srh-7	8.402	78.174	|	Chemoreceptor;Chemoreceptor: Srh class	Serpentine Receptor, class H [Source:UniProtKB/TrEMBL;Acc:Q9N5I6]	|	3.37047	6.47e-36	1.32e-33
WBGene00001448	flp-5	546.223	4955.4	|	Neuropeptide;Neuropeptide: FMRFamides (31 flp genes)	FMRFamide-like neuropeptides 5 APKPKFIRF-amide AGAKFIRF-amide GAKFIRF-amide [Source:UniProtKB/Swiss-Prot;Acc:O61466]	|	3.35487	3.1e-224	2.68e-220
WBGene00007262	jud-4	2.36	21.24	|			|	3.34539	5.25e-13	1.83e-11
WBGene00016281	pals-32	1.784	16.341	|		Protein containing ALS2cr12 (ALS2CR12) signature [Source:UniProtKB/TrEMBL;Acc:O16898]	|	3.33005	2.29e-13	8.37e-12
WBGene00006576	tkr-1	7.368	66.501	|	Neuropeptide receptors;Neuropeptide receptors: Ghrelin-obstatin/neuromedin U receptor family	Probable G-protein coupled receptor tkr-1 [Source:UniProtKB/Swiss-Prot;Acc:Q03566]	|	3.32131	1.77e-26	2.21e-24
WBGene00005402	srh-187	5.485	48.045	|	Chemoreceptor;Chemoreceptor: Srh class	Serpentine Receptor, class H [Source:UniProtKB/TrEMBL;Acc:Q22959]	|	3.29648	6.58e-36	1.32e-33
WBGene00013391	Y62H9A.3	2.401	20.747	|			|	3.25132	2.85e-15	1.34e-13
WBGene00016264	C30F12.5	4.995	40.866	|			|	3.22076	3.02e-26	3.76e-24
WBGene00019488	K07D4.9	86.837	696.942	|			|	3.18817	1.59e-70	1.31e-67
WBGene00006925	vit-1	1.337	11.083	|		Vitellogenin-1 [Source:UniProtKB/Swiss-Prot;Acc:P55155]	|	3.18377	4.89e-16	2.48e-14
WBGene00006214	str-170	5.303	42.629	|		Seven TM Receptor [Source:UniProtKB/TrEMBL;Acc:O44533]	|	3.16266	8.53e-40	2.1e-37
WBGene00017205	F07C4.12	8.545	68.013	|		Carboxylic ester hydrolase [Source:UniProtKB/TrEMBL;Acc:Q4PIS8]	|	3.15311	8.12e-28	1.1e-25
WBGene00005446	srh-239	21.578	172.127	|	Chemoreceptor;Chemoreceptor: Srh class	Serpentine Receptor, class H [Source:UniProtKB/TrEMBL;Acc:O62384]	|	3.15207	2.81e-42	7.59e-40
WBGene00006930	vit-6	4.396	35.556	|		Vitellogenin-6 [Source:UniProtKB/Swiss-Prot;Acc:P18948]	|	3.14767	1.75e-14	7.33e-13
WBGene00005520	sri-8	30.397	239.443	|			|	3.14022	3.23e-51	1.27e-48
WBGene00001449	flp-6	22.194	172.902	|	Neuropeptide;Neuropeptide: FMRFamides (31 flp genes)	FMRFamide-like neuropeptides 6 QQDSEVEREMM KSAYMRF-amide 1 KSAYMRF-amide 2 KSAYMRF-amide 3 KSAYMRF-amide 4 KSAYMRF-amide 5 KSAYMRF-amide 6 [Source:UniProtKB/Swiss-Prot;Acc:Q19165]	|	3.13975	1.96e-56	9.67e-54
WBGene00022829	ZK867.2	30.154	233.6	|	Ionotropic glutamate receptor;Ionotropic glutamate receptor: Diverese		|	3.11886	2.65e-54	1.24e-51
WBGene00015864	C16D9.9	1.405	10.502	|			|	3.07941	2.12e-05	0.00018
WBGene00019568	K09D9.11	6.551	48.13	|			|	3.04967	3.34e-49	1.18e-46
WBGene00013392	Y62H9A.4	10.065	74.465	|			|	3.04419	3.85e-29	5.64e-27
WBGene00005401	srh-186	5.012	36.77	|	Chemoreceptor;Chemoreceptor: Srh class	Serpentine Receptor, class H [Source:UniProtKB/TrEMBL;Acc:O45473]	|	3.02833	2.57e-34	4.67e-32
WBGene00002101	ins-18	16.372	118.168	|	Neuropeptide;Neuropeptide: Insulin-related peptides	Ceinsulin-1; INSulin related [Source:UniProtKB/TrEMBL;Acc:G5ECC6]	|	3.02646	1.25e-23	1.3e-21
WBGene00018139	sre-24	1.861	13.796	|	Chemoreceptor;Chemoreceptor: Sre class	Serpentine Receptor, class E (Epsilon) [Source:UniProtKB/TrEMBL;Acc:O45169]	|	3.01899	2.65e-14	1.09e-12
WBGene00020862	fip-2	8.749	61.748	|		Fungus-Induced Protein [Source:UniProtKB/TrEMBL;Acc:Q23052]	|	3.01222	1.1e-05	0.000101
WBGene00005097	srd-19	4.472	32.397	|	Chemoreceptor;Chemoreceptor: Srd class	Serpentine receptor class delta-19 [Source:UniProtKB/Swiss-Prot;Acc:P92002]	|	3.01116	3.87e-45	1.17e-42
WBGene00045306	ZC250.5	2.506	17.82	|			|	3.00703	7.45e-12	2.28e-10
WBGene00012035	T26C5.5	193.596	1377.41	|			|	2.99937	2.15e-62	1.28e-59
WBGene00006928	vit-4	2.247	16.298	|		Vitellogenin-4 [Source:UniProtKB/Swiss-Prot;Acc:P18947]	|	2.997	9.04e-22	7.93e-20
WBGene00014740	F21H7.6	10.542	74.566	|			|	2.98075	1.35e-27	1.79e-25
WBGene00008953	F19C6.4	11.632	82.161	|			|	2.98004	2.14e-44	6.36e-42
WBGene00011499	T05G5.4	10.457	73.04	|			|	2.96531	1.73e-43	4.99e-41
WBGene00044779	T10H9.8	4.062	27.931	|			|	2.94459	2.01e-19	1.44e-17
WBGene00005334	srh-115	5.188	35.686	|	Chemoreceptor;Chemoreceptor: Srh class	Serpentine Receptor, class H [Source:UniProtKB/TrEMBL;Acc:O45966]	|	2.94011	1.32e-36	2.71e-34
WBGene00007813	jmjd-3.3	5.836	38.984	|		JuMonJi (Transcription factor) Domain protein [Source:UniProtKB/TrEMBL;Acc:A0A131MD67]	|	2.92049	1.15e-23	1.2e-21
WBGene00020674	T22B7.7	5.901	39.23	|			|	2.91532	2.01e-29	2.99e-27
WBGene00045336	R11D1.12	19.758	131.934	|			|	2.90248	1.69e-38	3.89e-36
WBGene00000760	col-187	1.506	10.235	|		COLlagen [Source:UniProtKB/TrEMBL;Acc:Q18327]	|	2.89512	9.65e-08	1.47e-06
WBGene00023331	R13H7.3	3.045	20.005	|			|	2.88397	9.21e-07	1.11e-05
WBGene00015076	B0238.12	3.482	23.459	|			|	2.87922	7.74e-07	9.53e-06
WBGene00018111	F36H9.2	112.355	734.977	|			|	2.8772	8.89e-71	7.68e-68
WBGene00007344	C05E7.2	14.143	90.691	|			|	2.87009	8.24e-11	2.13e-09
WBGene00010144	F56C4.1	50.144	323.016	|			|	2.85403	9.79e-39	2.28e-36
WBGene00010944	M176.5	6.276	40.277	|			|	2.84916	2.95e-33	5.31e-31
WBGene00044283	spp-22	11.475	71.554	|		SaPosin-like Protein family [Source:UniProtKB/TrEMBL;Acc:Q3S1M3]	|	2.82038	1.02e-32	1.79e-30
WBGene00270321	Y41C4A.32	35.88	224.096	|			|	2.81199	3.7e-31	5.87e-29
WBGene00195144	C16D2.3	9.358	58.578	|			|	2.79313	2.59e-12	8.36e-11
WBGene00021740	Y50D4B.1	1.985	11.794	|			|	2.77088	9.82e-15	4.26e-13
WBGene00004256	pxn-1	1.72	10.331	|	Leucine Rich Repeat (LRR) domain containing protein;Leucine Rich Repeat (LRR) domain containing protein: Ig + LRR proteins	Peroxidasin homolog [Source:UniProtKB/Swiss-Prot;Acc:Q1ENI8]	|	2.7644	4.64e-50	1.74e-47
WBGene00001210	egl-46	16.613	101.37	|		C2H2 zinc finger protein EGL-46 [Source:UniProtKB/TrEMBL;Acc:G5EFY4]	|	2.75482	1.67e-22	1.54e-20
WBGene00045305	ZC250.4	1.938	11.433	|			|	2.7372	2.31e-13	8.41e-12
WBGene00235094	K08D9.9	3.941	22.917	|			|	2.73112	0.00253	0.0109
WBGene00018635	nprl-2	33.023	193.366	|		Nitrogen Permease Regulator Like homolog [Source:UniProtKB/TrEMBL;Acc:W6SBD7]	|	2.71843	1.25e-68	8.98e-66
WBGene00007913	cyp-36A1	26.347	155.443	|		Probable cytochrome P450 CYP36A1 [Source:UniProtKB/Swiss-Prot;Acc:P90771]	|	2.71651	9.79e-20	7.23e-18
WBGene00015790	C15C7.4	22.972	134.57	|			|	2.70613	6.93e-20	5.18e-18
WBGene00016429	C35A11.2	14.769	84.494	|			|	2.68772	1.34e-47	4.45e-45
WBGene00005321	srh-102	57.429	329.891	|	Chemoreceptor;Chemoreceptor: Srh class	Serpentine Receptor, class H [Source:UniProtKB/TrEMBL;Acc:Q9XV25]	|	2.68234	4.5e-23	4.32e-21
WBGene00005144	srd-67	2.886	16.251	|	Chemoreceptor;Chemoreceptor: Srd class	Serpentine Receptor, class D (Delta) [Source:UniProtKB/TrEMBL;Acc:Q9N5W4]	|	2.66005	1.37e-24	1.52e-22
WBGene00077627	T19C9.11	18.305	102.861	|			|	2.65129	8.17e-18	4.9e-16
WBGene00194717	ZC239.22	7.741	42.965	|			|	2.63794	6.17e-32	1.02e-29
WBGene00018569	F47F2.1	16.092	88.288	|		cAMP-dependent protein kinase, catalytic subunit-like [Source:UniProtKB/Swiss-Prot;Acc:Q7JP68]	|	2.63173	1.72e-73	1.65e-70
WBGene00006926	vit-2	6.227	34.413	|		Vitellogenin-2 [Source:UniProtKB/Swiss-Prot;Acc:P05690]	|	2.60815	3.03e-23	3.01e-21
WBGene00009058	F22E12.1	3.319	17.825	|			|	2.60061	6.42e-33	1.13e-30
WBGene00001820	ham-1	49.514	268.292	|			|	2.59191	2.06e-14	8.54e-13
WBGene00012226	W03G11.4	49.681	265.904	|			|	2.59039	8.41e-83	1.04e-79
WBGene00003516	nab-1	25.592	135.419	|	PDZ domain protein	NeurABin [Source:UniProtKB/TrEMBL;Acc:Q5R3Y6]	|	2.58728	9.53e-50	3.5e-47
WBGene00021881	Y54G2A.16	6.009	31.606	|			|	2.5804	2.65e-15	1.25e-13
WBGene00011551	T06G6.12	6.955	36.377	|			|	2.57243	1.04e-14	4.48e-13
WBGene00018376	F43C9.2	31.713	164.737	|	Calcium binding protein;Calcium binding protein: Others		|	2.56747	6.78e-18	4.08e-16
WBGene00013747	spe-19	7.32	38.711	|			|	2.56448	1.05e-21	9.19e-20
WBGene00016911	drn-1	7.356	38.657	|		GTP-binding protein drn-1 [Source:UniProtKB/Swiss-Prot;Acc:Q09930]	|	2.56071	3.16e-23	3.12e-21
WBGene00001940	his-66	23.247	122.62	|		Probable histone H2B 4 [Source:UniProtKB/Swiss-Prot;Acc:Q27876]	|	2.55975	0.0099	0.0333
WBGene00010866	M04D8.8	3.798	20.034	|			|	2.54124	2.87e-14	1.17e-12
WBGene00022497	Y119D3B.21	47.716	247.845	|			|	2.52853	7.36e-13	2.51e-11
WBGene00004999	spp-14	12.525	65.008	|		SaPosin-like Protein family [Source:UniProtKB/TrEMBL;Acc:Q2XN18]	|	2.52274	1.3e-08	2.38e-07
WBGene00268192	ZK697.17	76.294	390.891	|			|	2.51498	7.13e-20	5.31e-18
WBGene00002115	ins-32	1217.07	6154.77	|	Neuropeptide;Neuropeptide: Insulin-related peptides	INSulin related [Source:UniProtKB/TrEMBL;Acc:Q9TYK2]	|	2.509	9.57e-60	5.17e-57
WBGene00004120	pqn-32	1.999	10.026	|		Prion-like-(Q/N-rich)-domain-bearing protein [Source:UniProtKB/TrEMBL;Acc:Q9XV50]	|	2.50241	9.6e-13	3.24e-11
WBGene00019365	rei-2	12.357	62.751	|		Guanine nucleotide exchange factor rei-2 [Source:UniProtKB/Swiss-Prot;Acc:Q21194]	|	2.5024	7.68e-35	1.46e-32
WBGene00004986	spp-1	4.357	21.974	|		SaPosin-like Protein family [Source:UniProtKB/TrEMBL;Acc:Q22291]	|	2.4934	8.22e-09	1.55e-07
WBGene00005160	srg-2	2.199	11.047	|	Chemoreceptor;Chemoreceptor: Srg class	Serpentine receptor class gamma-2 [Source:UniProtKB/Swiss-Prot;Acc:P46571]	|	2.48669	2.27e-11	6.4e-10
WBGene00003748	nlp-10	254.969	1265.65	|	Neuropeptide;Neuropeptide: Neuropeptide-like proteins	Neuropeptide-Like Protein [Source:UniProtKB/TrEMBL;Acc:Q20114]	|	2.48602	2.66e-97	3.83e-94
WBGene00010179	F57A8.4	8.392	41.762	|	Neuropeptide receptors;Neuropeptide receptors: Another Drosophila FMRFamide receptor family		|	2.47108	1.95e-42	5.36e-40
WBGene00020791	T25B6.5	6.847	33.634	|			|	2.45865	4.33e-09	8.55e-08
WBGene00001545	gcy-20	2.493	12.029	|	Guanylyl cycalse;Guanylyl cycalse: Receptor-type GCY	Receptor-type guanylate cyclase gcy-20 [Source:UniProtKB/Swiss-Prot;Acc:O62179]	|	2.42949	2.84e-20	2.19e-18
WBGene00014799	K05D4.5	16.593	78.927	|			|	2.41524	4.99e-33	8.89e-31
WBGene00010109	F55C10.5	3.883	18.016	|			|	2.38447	6.54e-12	2.01e-10
WBGene00006982	zig-5	125.152	571.453	|	Extracellular Immunoglobulin;Extracellular Immunoglobulin: Ig domain proteins	Zwei Ig domain protein zig-5 [Source:UniProtKB/Swiss-Prot;Acc:Q9XXD7]	|	2.3777	1.17e-37	2.59e-35
WBGene00016704	hosl-1	8.152	37.401	|			|	2.36665	2.73e-41	7.03e-39
WBGene00020424	T10H9.1	3.523	16.158	|			|	2.35626	8.84e-12	2.67e-10
WBGene00015535	C06E4.6	2.559	11.599	|			|	2.35588	4.61e-10	1.07e-08
WBGene00001447	flp-4	2178.64	9794.81	|	Neuropeptide;Neuropeptide: FMRFamides (31 flp genes)	FMRF-Like Peptide; FMRFamide-like peptide 4 [Source:UniProtKB/TrEMBL;Acc:G5EG31]	|	2.34294	8.47e-137	2.92e-133
WBGene00003991	pfn-3	35.85	164.205	|		Profilin-3 [Source:UniProtKB/Swiss-Prot;Acc:Q21193]	|	2.32987	3.24e-06	3.39e-05
WBGene00010390	srz-30	39.618	173.324	|			|	2.30301	6.15e-25	7.18e-23
WBGene00001570	gei-13	22.533	99.434	|		Gex-3-interacting protein 13 [Source:UniProtKB/Swiss-Prot;Acc:P34478]	|	2.29814	1.17e-20	9.57e-19
WBGene00011472	T05C12.9	3.471	15.211	|			|	2.287	1.26e-10	3.15e-09
WBGene00077613	F21H7.16	3.689	16.433	|			|	2.2865	5.81e-07	7.33e-06
WBGene00008901	nhr-27	8.734	37.918	|		Nuclear Hormone Receptor family [Source:UniProtKB/TrEMBL;Acc:G5EGN8]	|	2.27995	1.12e-24	1.27e-22
WBGene00012213	W02D9.7	19.762	86.408	|			|	2.27829	9.35e-07	1.13e-05
WBGene00003613	nhr-14	25.157	108.881	|		Nuclear hormone receptor family member nhr-14 [Source:UniProtKB/Swiss-Prot;Acc:O02151]	|	2.27343	1.95e-29	2.93e-27
WBGene00012419	srz-73	9.485	40.953	|			|	2.27291	9.65e-14	3.69e-12
WBGene00013470	clec-243	14.001	60.372	|		C-type LECtin [Source:UniProtKB/TrEMBL;Acc:G5EG12]	|	2.25937	3.51e-15	1.62e-13
WBGene00012069	T26H5.4	3.27	14.27	|			|	2.25571	0.000878	0.00449
WBGene00000282	cah-4	22.217	92.954	|	Gas receptors;Gas receptors: Carbonic anhydrase	Carbonic AnHydrase [Source:UniProtKB/TrEMBL;Acc:Q21614]	|	2.24723	5.64e-24	6.09e-22
WBGene00020008	R11F4.2	7.431	31.578	|	Neuropeptide receptors;Neuropeptide receptors: Another Drosophila FMRFamide receptor family		|	2.24703	6.1e-26	7.42e-24
WBGene00020561	T19C3.3	3.777	16.044	|			|	2.23157	1.41e-05	0.000126
WBGene00005521	sri-9	9.402	39.053	|	Chemoreceptor;Chemoreceptor: Sri class	Serpentine Receptor, class I [Source:UniProtKB/TrEMBL;Acc:Q9XX84]	|	2.21886	7.71e-32	1.24e-29
WBGene00008484	E04D5.5	94.028	383.534	|			|	2.20784	7.66e-20	5.68e-18
WBGene00005440	srh-233	2.446	10.086	|	Chemoreceptor;Chemoreceptor: Srh class	Serpentine Receptor, class H [Source:UniProtKB/TrEMBL;Acc:Q9U2Z3]	|	2.19694	2.65e-11	7.35e-10
WBGene00195143	nlp-78	14.596	59.932	|	Neuropeptide;Neuropeptide: Neuropeptide-like proteins	Neuropeptide-Like Protein [Source:UniProtKB/TrEMBL;Acc:D6VPA4]	|	2.19403	4.95e-09	9.63e-08
WBGene00005589	sri-77	17.115	69.359	|	Chemoreceptor;Chemoreceptor: Sri class	Serpentine Receptor, class I [Source:UniProtKB/TrEMBL;Acc:O16591]	|	2.1867	1.4e-28	1.96e-26
WBGene00020642	T20H9.6	9.462	38.612	|			|	2.1807	8.05e-24	8.58e-22
WBGene00008298	C54D10.3	3.939	15.573	|			|	2.1783	0.00314	0.013
WBGene00010632	K07C5.9	578.143	2316.79	|			|	2.17301	1.97e-39	4.66e-37
WBGene00003752	nlp-14	369	1456.58	|	Neuropeptide;Neuropeptide: Neuropeptide-like proteins	Neuropeptide-Like Protein [Source:UniProtKB/TrEMBL;Acc:H2KYR6]	|	2.15706	4.05e-61	2.33e-58
WBGene00015495	C05E11.6	52.366	206.899	|			|	2.1569	7.35e-43	2.08e-40
WBGene00015942	osta-2	5.801	22.92	|		Organic solute transporter alpha-like protein 2 [Source:UniProtKB/Swiss-Prot;Acc:Q18071]	|	2.15511	4.12e-12	1.3e-10
WBGene00020581	T19D12.6	154.278	608.778	|			|	2.15176	2.03e-78	2.34e-75
WBGene00050904	Y70C5A.3	4.709	18.64	|			|	2.14915	8.5e-09	1.6e-07
WBGene00004990	spp-5	8.513	34.362	|		SaPosin-like Protein family [Source:UniProtKB/TrEMBL;Acc:Q86FL8]	|	2.148	1.11e-08	2.06e-07
WBGene00014041	ZK666.1	4.326	17.009	|			|	2.14254	0.000445	0.00251
WBGene00020792	T25B6.6	8.558	33.348	|			|	2.14035	6.77e-08	1.07e-06
WBGene00003759	nlp-21	399.418	1547.01	|	Neuropeptide;Neuropeptide: Neuropeptide-like proteins	Neuropeptide-Like Protein [Source:UniProtKB/TrEMBL;Acc:Q9XX02]	|	2.13617	3.98e-20	3.03e-18
WBGene00014241	ZK1251.3	140.903	548.297	|			|	2.13548	2.73e-30	4.24e-28
WBGene00007370	str-264	103.845	406.781	|		Seven TM Receptor [Source:UniProtKB/TrEMBL;Acc:O17571]	|	2.13211	2.9e-15	1.35e-13
WBGene00010196	F57C2.4	20.108	77.963	|			|	2.12576	7.1e-11	1.85e-09
WBGene00002038	hum-5	12.03	47.244	|	Myosin motors	Heavy chain, Unconventional Myosin; Myosin IA [Source:UniProtKB/TrEMBL;Acc:G5ECZ0]	|	2.12527	8.3e-24	8.8e-22
WBGene00044767	T23B7.3	242.386	939.352	|			|	2.11398	3.94e-18	2.39e-16
WBGene00008382	D1081.4	4.256	15.915	|			|	2.10562	1.3e-05	0.000118
WBGene00012090	T27E7.5	17.163	65.923	|			|	2.10492	1.51e-15	7.27e-14
WBGene00015683	C10G8.4	73.046	281.182	|			|	2.09431	2.3e-08	4.02e-07
WBGene00019054	F58F6.6	11.758	44.754	|			|	2.0936	2.89e-13	1.03e-11
WBGene00006620	svh-1	5.947	22.539	|		HGF/MSP/plasminogen-like protein [Source:UniProtKB/TrEMBL;Acc:Q17800]	|	2.08846	9.54e-21	7.81e-19
WBGene00001844	hid-1	13.974	51.839	|		HID-1; High temperature-Induced Dauer formation [Source:UniProtKB/TrEMBL;Acc:G5EG65]	|	2.06994	3.02e-24	3.3e-22
WBGene00002081	ina-1	5.268	19.699	|		Integrin alpha ina-1 [Source:UniProtKB/Swiss-Prot;Acc:Q03600]	|	2.06878	1.81e-15	8.7e-14
WBGene00044523	F37B4.14	3.453	13.148	|			|	2.06537	5.82e-07	7.34e-06
WBGene00077523	C23H5.12	8.157	30.226	|			|	2.05724	4.13e-11	1.13e-09
WBGene00006365	syg-1	3.009	11.177	|	Extracellular Immunoglobulin;Extracellular Immunoglobulin: Ig domain proteins	Synaptogenesis protein syg-1 [Source:UniProtKB/Swiss-Prot;Acc:B1Q236]	|	2.05494	9.98e-15	4.32e-13
WBGene00050933	T19C9.9	78.773	289.24	|			|	2.04512	6.11e-08	9.77e-07
WBGene00017901	igeg-1	25.709	94.466	|	Extracellular Immunoglobulin;Extracellular Immunoglobulin: Ig domain proteins	IG (Immunoglobulin), EGF and transmmembrane domain [Source:UniProtKB/TrEMBL;Acc:U4PLF0]	|	2.04051	6.5e-19	4.33e-17
WBGene00010613	K07A1.6	4.1	15.184	|			|	2.0405	0.000612	0.00332
WBGene00000670	col-95	8.274	30.734	|		COLlagen [Source:UniProtKB/TrEMBL;Acc:Q86MP1]	|	2.03874	1.55e-06	1.76e-05
WBGene00007540	C12D8.13	42.42	155.722	|			|	2.03713	1.72e-19	1.24e-17
WBGene00010754	K10G4.5	3.135	11.466	|			|	2.03135	4.93e-11	1.32e-09
WBGene00077699	C45B11.8	9.022	32.219	|			|	2.02398	1.04e-06	1.23e-05
WBGene00022572	ZC239.14	31.593	114.214	|			|	2.02364	5.72e-38	1.28e-35
WBGene00010910	M106.2	27.01	97.985	|			|	2.0222	4.83e-53	2.03e-50
WBGene00023518	srz-76	14.709	53.475	|			|	2.02061	2.55e-18	1.56e-16
WBGene00004924	snt-4	431.118	1547.16	|	Synaptic release machinery;Synaptic release machinery: synaptotagmin	SyNapTotagmin [Source:UniProtKB/TrEMBL;Acc:P91493]	|	2.01538	3.87e-70	3.04e-67
WBGene00006476	rhgf-2	16.299	58.459	|		RHo Guanine nucleotide exchange Factor [Source:UniProtKB/TrEMBL;Acc:Q22354]	|	2.01502	2.95e-37	6.29e-35
WBGene00007315	C04H5.7	5.062	17.892	|			|	2.00324	3.56e-05	0.000284
WBGene00017727	F22H10.3	7.032	25.319	|			|	1.99737	6.83e-07	8.49e-06
WBGene00002203	kin-20	23.509	83.885	|		Casein kinase I isoform delta [Source:UniProtKB/Swiss-Prot;Acc:Q20471]	|	1.99618	1.04e-28	1.48e-26
WBGene00006411	octr-1	10.975	39.315	|	Metabotropic neurotransmitter receptor;Metabotropic neurotransmitter receptor: Ligand:octopamine;Metabotropic neurotransmitter receptor: biogenic amine receptor	OCTopamine Receptor (GPCR) [Source:UniProtKB/TrEMBL;Acc:Q7JP61]	|	1.99316	1.37e-08	2.49e-07
WBGene00020069	R13H7.2	11.031	39.406	|	Neuropeptide receptors;Neuropeptide receptors: Related family with no specific orthologs 1		|	1.99288	1.79e-17	1.04e-15
WBGene00001459	flp-16	323.403	1138.41	|	Neuropeptide;Neuropeptide: FMRFamides (31 flp genes)	FMRFamide-like neuropeptides 16 AQTFVRF-amide 1 AQTFVRF-amide 2 GQTFVRF-amide [Source:UniProtKB/Swiss-Prot;Acc:Q7YX32]	|	1.98905	5.12e-55	2.46e-52
WBGene00014943	Y68A4A.8	56.505	200.107	|			|	1.9791	7.01e-13	2.4e-11
WBGene00021011	W03G1.5	282.84	988.626	|			|	1.97591	1.38e-21	1.18e-19
WBGene00008315	C54G4.5	5.767	19.994	|			|	1.9736	0.000161	0.00105
WBGene00009634	nspc-9	13.053	46.521	|		Nematode Specific Peptide family, group C [Source:UniProtKB/TrEMBL;Acc:Q20345]	|	1.96427	0.0136	0.0432
WBGene00010183	fipr-13	13.298	46.163	|		FIP (Fungus-Induced Protein) Related [Source:UniProtKB/TrEMBL;Acc:Q7YX01]	|	1.95958	4.2e-11	1.14e-09
WBGene00011707	T11B7.2	115.773	399.979	|			|	1.95021	5.6e-19	3.78e-17
WBGene00011549	T06G6.8	15.199	52.398	|			|	1.94093	5.94e-10	1.35e-08
WBGene00044028	nlp-63	762.319	2593.01	|	Neuropeptide;Neuropeptide: Neuropeptide-like proteins	Neuropeptide-Like Protein [Source:UniProtKB/TrEMBL;Acc:Q5FC76]	|	1.94058	6.89e-47	2.2e-44
WBGene00006631	tsp-5	94.429	323.857	|		Tetraspanin [Source:UniProtKB/TrEMBL;Acc:O62466]	|	1.92148	3e-07	4.03e-06
WBGene00010674	K08E7.6	24.251	79.975	|			|	1.90358	4.71e-21	3.91e-19
WBGene00016215	glb-10	14.521	48.554	|	Gas receptors;Gas receptors: Globin	GLoBin related [Source:UniProtKB/TrEMBL;Acc:Q18311]	|	1.90092	1.63e-13	6.11e-12
WBGene00005586	sri-74	16.486	54.809	|	Chemoreceptor;Chemoreceptor: Sri class	Serpentine Receptor, class I [Source:UniProtKB/TrEMBL;Acc:O44840]	|	1.89452	2.45e-13	8.88e-12
WBGene00007260	olrn-1	9.123	30.119	|			|	1.89287	5.23e-23	4.99e-21
WBGene00008820	nlp-55	212.939	701.49	|	Neuropeptide;Neuropeptide: Neuropeptide-like proteins	Neuropeptide-Like Protein [Source:UniProtKB/TrEMBL;Acc:Q19465]	|	1.88935	8.23e-36	1.63e-33
WBGene00019426	cutl-16	53.695	177.609	|		CUTiclin-Like [Source:UniProtKB/TrEMBL;Acc:Q09586]	|	1.88801	2.11e-15	1.01e-13
WBGene00007765	C27B7.9	4.45	14.784	|			|	1.8834	0.000735	0.00388
WBGene00014798	K05D4.1	5.582	18.487	|			|	1.8834	2.65e-11	7.35e-10
WBGene00019955	R08C7.12	9.926	32.467	|			|	1.86823	1.98e-15	9.49e-14
WBGene00009571	F40D4.12	12.449	40.782	|			|	1.86502	6.41e-11	1.69e-09
WBGene00022613	sek-3	72.657	236.566	|		SAPK/ERK kinase [Source:UniProtKB/TrEMBL;Acc:Q8MPS3]	|	1.86409	4.85e-21	4.01e-19
WBGene00004078	pos-1	16.594	53.672	|		Cytoplasmic zinc-finger protein; POsterior Segregation [Source:UniProtKB/TrEMBL;Acc:G5EF15]	|	1.84845	1.68e-09	3.53e-08
WBGene00018215	igcm-1	4.724	15.232	|	Extracellular Immunoglobulin;Extracellular Immunoglobulin: Ig domain proteins	ImmunoGlobulin-like Cell adhesion Molecule family [Source:UniProtKB/TrEMBL;Acc:Q9TXI8]	|	1.84802	1.07e-13	4.04e-12
WBGene00011694	T10G3.3	6.383	20.498	|			|	1.84632	1.28e-10	3.21e-09
WBGene00008808	ntr-2	12.426	39.598	|	Neuropeptide receptors;Neuropeptide receptors: Related Vasopressin receptor family	Nematocin receptor 2 [Source:UniProtKB/Swiss-Prot;Acc:O62169]	|	1.84546	2.84e-29	4.2e-27
WBGene00010865	M04D8.7	309.015	985.788	|			|	1.8425	5.6e-31	8.8e-29
WBGene00020530	T15B12.1	5.027	15.746	|			|	1.83473	9.67e-15	4.21e-13
WBGene00022648	ZK54.3	42.665	135.686	|			|	1.83075	1.41e-08	2.56e-07
WBGene00022592	klu-2	12.789	39.887	|		KLUmpfuss related [Source:UniProtKB/TrEMBL;Acc:O02050]	|	1.8063	6e-23	5.69e-21
WBGene00000910	daf-14	28.974	91.039	|		Smad protein [Source:UniProtKB/TrEMBL;Acc:G5EEP2]	|	1.80268	4.5e-11	1.21e-09
WBGene00194674	F23D12.11	77.361	241.012	|			|	1.80267	8.9e-07	1.08e-05
WBGene00009637	nspc-13	4.934	15.697	|		Nematode Specific Peptide family, group C [Source:UniProtKB/TrEMBL;Acc:G5EF55]	|	1.79919	0.014	0.0442
WBGene00019207	fgt-1	27.794	85.378	|		Facilitated glucose transporter protein 1 [Source:UniProtKB/Swiss-Prot;Acc:O44827]	|	1.79555	1.18e-26	1.51e-24
WBGene00017675	F21F3.6	56.246	173.853	|			|	1.79173	3.54e-23	3.46e-21
WBGene00000675	col-101	128.353	401.255	|		COLlagen [Source:UniProtKB/TrEMBL;Acc:O45105]	|	1.79049	0.000807	0.00418
WBGene00005179	srg-22	28.299	87.245	|	Chemoreceptor;Chemoreceptor: Srg class	Serpentine receptor class gamma [Source:UniProtKB/TrEMBL;Acc:Q9TYL7]	|	1.77903	1.34e-10	3.33e-09
WBGene00018301	F41G3.5	10.388	31.521	|			|	1.77443	7.89e-10	1.75e-08
WBGene00021953	Y55H10A.2	38.582	116.891	|			|	1.76315	1.16e-11	3.44e-10
WBGene00021919	cutl-25	9.746	29.346	|		CUTiclin-Like [Source:UniProtKB/TrEMBL;Acc:Q7KWZ4]	|	1.76121	2.81e-09	5.71e-08
WBGene00006530	tba-4	8.091	24.384	|		Tubulin alpha chain [Source:UniProtKB/TrEMBL;Acc:G5EDD4]	|	1.76064	9.19e-16	4.55e-14
WBGene00005335	srh-116	57.944	175.944	|	Chemoreceptor;Chemoreceptor: Srh class	Serpentine Receptor, class H [Source:UniProtKB/TrEMBL;Acc:O45965]	|	1.75769	7.37e-15	3.26e-13
WBGene00017770	F25B4.7	25.142	75.897	|			|	1.75288	2.17e-06	2.37e-05
WBGene00001123	dyf-7	6.54	19.732	|			|	1.74578	1.6e-11	4.59e-10
WBGene00016246	daf-37	4.953	14.648	|	Neuropeptide receptors;Neuropeptide receptors: Drosophila FMRFamide receptor family	G-protein coupled receptor daf-37 [Source:UniProtKB/Swiss-Prot;Acc:Q18321]	|	1.73828	2.69e-08	4.65e-07
WBGene00005467	srh-261	5.881	17.699	|			|	1.73414	2.77e-07	3.76e-06
WBGene00016530	C39D10.2	1140.11	3364.26	|			|	1.73101	3.98e-53	1.72e-50
WBGene00006306	sue-1	6.27	18.566	|		SUppressor of Elongation defect [Source:UniProtKB/TrEMBL;Acc:Q19136]	|	1.72918	1.26e-14	5.35e-13
WBGene00001992	hot-7	49.634	144.571	|	Auxiliary subunit for:: nAChR LGIC	Homolog of Odr-2 (Two); Ly-6-related protein HOT-7 [Source:UniProtKB/TrEMBL;Acc:G5EBH9]	|	1.72548	5.53e-15	2.48e-13
WBGene00005581	sri-69	36.038	105.748	|	Chemoreceptor;Chemoreceptor: Sri class	Serpentine Receptor, class I [Source:UniProtKB/TrEMBL;Acc:Q9XX83]	|	1.7249	1.55e-29	2.35e-27
WBGene00001920	his-46	25.441	75.373	|		Histone H4 [Source:UniProtKB/Swiss-Prot;Acc:P62784]	|	1.72297	0.00094	0.00475
WBGene00005002	spp-17	15.674	46.688	|		SaPosin-like Protein family [Source:UniProtKB/TrEMBL;Acc:Q8WSN3]	|	1.71861	8.02e-05	0.000577
WBGene00044067	zipt-7.1	6.339	18.586	|		Zinc transporter zipt-7.1 [Source:UniProtKB/Swiss-Prot;Acc:Q9XUC4]	|	1.71316	8.36e-09	1.57e-07
WBGene00000002	aat-1	5.67	16.476	|		Amino Acid Transporter [Source:UniProtKB/TrEMBL;Acc:Q19834]	|	1.71273	1.67e-09	3.52e-08
WBGene00018971	clec-67	67.966	197.884	|		C-type LECtin [Source:UniProtKB/TrEMBL;Acc:Q8ITX4]	|	1.70445	6.76e-12	2.08e-10
WBGene00016874	C52B11.5	3.976	11.44	|			|	1.70341	5.84e-07	7.35e-06
WBGene00018972	srz-19	95.411	275.877	|	Chemoreceptor;Chemoreceptor: Srz class	Serpentine Receptor, class Z [Source:UniProtKB/TrEMBL;Acc:Q8ITX5]	|	1.70011	2.7e-13	9.73e-12
WBGene00013935	ZK218.1	6.455	18.718	|			|	1.69508	1.5e-09	3.19e-08
WBGene00002090	ins-7	5.307	15.239	|	Neuropeptide;Neuropeptide: Insulin-related peptides	Probable insulin-like peptide beta-type 4 [Source:UniProtKB/Swiss-Prot;Acc:Q23430]	|	1.68111	0.0021	0.0093
WBGene00009914	F49H6.13	3.832	11.112	|			|	1.67799	0.0132	0.042
WBGene00020524	dmsr-13	18.33	52.5	|	Neuropeptide receptors;Neuropeptide receptors: Drosophila Dromyosuppressin receptor family	DroMyoSuppressin Receptor related [Source:UniProtKB/TrEMBL;Acc:O17030]	|	1.67125	7.16e-08	1.12e-06
WBGene00013297	Y57G11B.5	6.949	19.485	|			|	1.66744	1.45e-05	0.000129
WBGene00001921	his-47	35.035	99.735	|		Histone H2A [Source:UniProtKB/Swiss-Prot;Acc:P09588]	|	1.66664	0.00011	0.000754
WBGene00016862	C52A10.1	192.488	549.198	|		Carboxylic ester hydrolase [Source:UniProtKB/TrEMBL;Acc:Q95YC4]	|	1.66596	1.53e-09	3.25e-08
WBGene00005696	sru-33	10.499	29.975	|			|	1.66578	9.27e-12	2.79e-10
WBGene00010394	srz-59	8.166	22.924	|	Chemoreceptor;Chemoreceptor: Srz class	Serpentine Receptor, class Z [Source:UniProtKB/TrEMBL;Acc:A0A060Q5Z9]	|	1.66025	1.97e-12	6.43e-11
WBGene00001172	egl-3	315.182	885.4	|	Neuropeptide processing;Neuropeptide processing: Maturation	Neuroendocrine convertase 2 [Source:UniProtKB/Swiss-Prot;Acc:G5ECN9]	|	1.65804	3.16e-49	1.14e-46
WBGene00005263	srh-40	37.845	107.003	|	Chemoreceptor;Chemoreceptor: Srh class	Serpentine Receptor, class H [Source:UniProtKB/TrEMBL;Acc:O76724]	|	1.65521	2.07e-10	5.02e-09
WBGene00013702	Y106G6D.6	3.954	11.27	|			|	1.65416	9.52e-06	8.92e-05
WBGene00005181	srg-24	6.87	19.25	|	Chemoreceptor;Chemoreceptor: Srg class	Serpentine receptor class gamma [Source:UniProtKB/TrEMBL;Acc:Q9TYL5]	|	1.65411	3.03e-07	4.08e-06
WBGene00003237	mif-4	13.656	38.053	|		MIF (Macrophage migration Inhibitory Factor) related [Source:UniProtKB/TrEMBL;Acc:Q9GUG4]	|	1.65312	3.31e-05	0.000267
WBGene00007910	C34B4.5	102.17	287.865	|			|	1.65247	1.41e-12	4.65e-11
WBGene00001939	his-65	142.166	400.838	|		Histone H2A [Source:UniProtKB/Swiss-Prot;Acc:P09588]	|	1.64985	2.06e-06	2.26e-05
WBGene00000227	atm-1	9.894	27.65	|		Serine/threonine-protein kinase ATM [Source:UniProtKB/Swiss-Prot;Acc:Q9N3Q4]	|	1.64852	6.15e-25	7.18e-23
WBGene00015798	C15H9.2	6.666	18.274	|			|	1.64351	9.84e-07	1.18e-05
WBGene00017582	F18G5.6	5.726	16.171	|			|	1.64268	0.000221	0.00137
WBGene00016801	C50C3.5	3.713	10.201	|	Calcium binding protein;Calcium binding protein: Others	Uncharacterized calcium-binding protein C50C3.5 [Source:UniProtKB/Swiss-Prot;Acc:P34368]	|	1.64011	5.85e-05	0.000438
WBGene00015474	C05D9.7	3.689	10.101	|			|	1.63703	3.83e-05	0.000302
WBGene00015354	snet-1	22940.1	62992	|	Neuropeptide;Neuropeptide: Neuropeptide-like proteins		|	1.63279	1.04e-32	1.8e-30
WBGene00015667	C10A4.6	6.485	17.716	|			|	1.62931	2.58e-08	4.48e-07
WBGene00000818	csn-6	40.92	112.181	|		COP9 signalosome complex subunit 6 [Source:UniProtKB/Swiss-Prot;Acc:Q95PZ0]	|	1.62297	3.62e-28	4.93e-26
WBGene00302976	F49E8.8	5.855	15.83	|			|	1.62049	2.88e-07	3.89e-06
WBGene00044436	Y47G6A.31	32.928	89.796	|			|	1.6186	5.53e-15	2.48e-13
WBGene00012794	Y43E12A.2	26.74	73.306	|			|	1.61805	6.46e-19	4.32e-17
WBGene00271444	T04C12.33	10.091	28.058	|			|	1.61761	2.72e-05	0.000223
WBGene00020446	T12B3.3	12.91	35.476	|			|	1.61633	7.47e-11	1.94e-09
WBGene00018219	F40A3.4	10.295	28.041	|			|	1.61302	1.12e-05	0.000103
WBGene00003651	nhr-61	50.147	136.256	|		Nuclear hormone receptor family member nhr-61 [Source:UniProtKB/Swiss-Prot;Acc:O62389]	|	1.61185	1.73e-20	1.37e-18
WBGene00013751	Y113G7A.14	15.093	40.646	|			|	1.60755	3.58e-19	2.48e-17
WBGene00001509	fzo-1	14.906	39.637	|		Transmembrane GTPase fzo-1 [Source:UniProtKB/Swiss-Prot;Acc:Q23424]	|	1.5946	1.64e-13	6.12e-12
WBGene00044061	tbc-12	18.253	49.203	|		TBC (Tre-2/Bub2/Cdc16) domain family [Source:UniProtKB/TrEMBL;Acc:Q21928]	|	1.59449	3.36e-14	1.35e-12
WBGene00013326	anoh-2	14.599	39.469	|	Chloride channel;Chloride channel: anoctamin-related	Anoctamin [Source:UniProtKB/TrEMBL;Acc:H2L2L3]	|	1.59274	8.68e-15	3.82e-13
WBGene00005337	srh-118	49.221	132.619	|	Chemoreceptor;Chemoreceptor: Srh class	Serpentine Receptor, class H [Source:UniProtKB/TrEMBL;Acc:O45651]	|	1.59013	1.39e-11	4.03e-10
WBGene00010316	F59B8.1	8.376	22.666	|			|	1.58952	1.19e-05	0.000108
WBGene00044081	D1086.11	6.662	18.032	|			|	1.58785	0.000179	0.00115
WBGene00014074	ZK757.2	43.993	119.697	|			|	1.58738	8.69e-05	0.000618
WBGene00023471	srz-86	18.292	49.532	|			|	1.58676	5.69e-10	1.3e-08
WBGene00005348	srh-131	100.279	266.809	|	Chemoreceptor;Chemoreceptor: Srh class	Serpentine Receptor, class H [Source:UniProtKB/TrEMBL;Acc:Q9XX66]	|	1.58488	1.09e-16	5.88e-15
WBGene00010092	F55C5.2	18.322	49.428	|			|	1.58256	3.89e-12	1.23e-10
WBGene00022245	acp-6	25.924	69.105	|		ACid Phosphatase family [Source:UniProtKB/TrEMBL;Acc:Q9GUF2]	|	1.58083	0.000332	0.00194
WBGene00044644	B0205.13	1271.59	3414.23	|			|	1.57496	1.89e-05	0.000163
WBGene00045340	T10G3.8	8.394	22.055	|			|	1.57458	1.2e-05	0.000109
WBGene00013867	ZC373.2	24.163	63.534	|			|	1.56755	0.00169	0.00776
WBGene00012019	dkf-2	114.319	300.197	|		Serine/threonine-protein kinase dkf-2 [Source:UniProtKB/Swiss-Prot;Acc:O45818]	|	1.56005	8.4e-37	1.75e-34
WBGene00012557	Y37D8A.19	103.6	273.211	|			|	1.55864	9.33e-05	0.000655
WBGene00018739	F53B1.8	27.798	72.356	|		Solute carrier organic anion transporter family member [Source:UniProtKB/TrEMBL;Acc:X5LX59]	|	1.55332	7.03e-32	1.15e-29
WBGene00017637	F20D6.8	13.55	35.826	|			|	1.55237	0.000115	0.000787
WBGene00004762	sel-5	26.64	68.723	|		Serine/threonine-protein kinase sel-5 [Source:UniProtKB/Swiss-Prot;Acc:G5ECQ3]	|	1.53679	1.12e-18	7.35e-17
WBGene00000006	aat-5	10.93	28.149	|		Amino Acid Transporter [Source:UniProtKB/TrEMBL;Acc:H2KZG9]	|	1.53508	1.72e-13	6.4e-12
WBGene00000195	arr-1	54.354	139.764	|	GPCR signalling;GPCR signalling: Arrestins	Beta-arrestin arr-1 [Source:UniProtKB/Swiss-Prot;Acc:P51485]	|	1.52861	1.18e-08	2.17e-07
WBGene00015186	misc-1	26.643	68.095	|		Mitochondrial 2-oxoglutarate/malate carrier protein [Source:UniProtKB/Swiss-Prot;Acc:P90992]	|	1.52137	1.5e-15	7.27e-14
WBGene00012607	Y38F1A.4	145.02	370.31	|			|	1.50448	1.76e-08	3.15e-07
WBGene00001886	his-12	20.299	52.377	|		Histone H2A [Source:UniProtKB/Swiss-Prot;Acc:P09588]	|	1.50214	0.00079	0.00411
WBGene00007267	C03A3.2	7.716	19.37	|		Transmembrane protein 104 homolog [Source:UniProtKB/Swiss-Prot;Acc:Q17598]	|	1.50014	4.45e-14	1.77e-12
WBGene00006205	str-160	4.794	12.216	|		Seven TM Receptor [Source:UniProtKB/TrEMBL;Acc:Q965K9]	|	1.49876	9.62e-07	1.15e-05
WBGene00010575	flp-25	2537.87	6356.43	|	Neuropeptide;Neuropeptide: FMRFamides (31 flp genes)	FMRF-Like Peptide [Source:UniProtKB/TrEMBL;Acc:Q6LAC9]	|	1.49815	9.39e-40	2.25e-37
WBGene00007959	C35C5.10	56.157	141.487	|			|	1.49662	8.38e-15	3.69e-13
WBGene00006143	str-84	59.864	149.722	|		Seven TM Receptor [Source:UniProtKB/TrEMBL;Acc:O16755]	|	1.49094	2.85e-13	1.02e-11
WBGene00001102	dsh-2	5.954	14.965	|	PDZ domain protein	DiSHevelled related [Source:UniProtKB/TrEMBL;Acc:Q18239]	|	1.48976	1.05e-14	4.51e-13
WBGene00012295	nmat-1	27.079	67.597	|		Nicotinamide-nucleotide adenylyltransferase [Source:UniProtKB/TrEMBL;Acc:Q9XXM2]	|	1.48931	3.22e-24	3.5e-22
WBGene00001922	his-48	26.286	66.015	|		Probable histone H2B 4 [Source:UniProtKB/Swiss-Prot;Acc:Q27876]	|	1.48252	1.59e-06	1.8e-05
WBGene00007633	C16D2.1	26.054	65.122	|			|	1.48061	1.42e-17	8.31e-16
WBGene00017813	nlp-61	1000.92	2481.29	|	Neuropeptide;Neuropeptide: Neuropeptide-like proteins	Neuropeptide-Like Protein [Source:UniProtKB/TrEMBL;Acc:Q19806]	|	1.48001	2.52e-37	5.45e-35
WBGene00020462	ari-2	5.701	14.209	|		Potential E3 ubiquitin-protein ligase ariadne-2 [Source:UniProtKB/Swiss-Prot;Acc:Q22431]	|	1.47975	6.54e-10	1.48e-08
WBGene00015626	C09B9.1	62.146	155.588	|			|	1.47956	5.62e-14	2.21e-12
WBGene00008444	tbc-14	21.498	53.569	|		TBC (Tre-2/Bub2/Cdc16) domain family [Source:UniProtKB/TrEMBL;Acc:A0A168H1X0]	|	1.4768	2.39e-16	1.24e-14
WBGene00020838	trak-1	42.712	105.524	|		TRAK1 and TRAK2 related [Source:UniProtKB/TrEMBL;Acc:Q86NB8]	|	1.47492	4.88e-37	1.03e-34
WBGene00005336	srh-117	130.125	324.653	|			|	1.47477	9.24e-10	2.04e-08
WBGene00006539	tbb-6	157.632	393.101	|		Tubulin beta chain [Source:UniProtKB/TrEMBL;Acc:G5EF01]	|	1.47218	2.84e-12	9.16e-11
WBGene00003739	nlp-1	5.369	12.856	|	Neuropeptide;Neuropeptide: Neuropeptide-like proteins	Neuropeptide-like protein 1 [Source:UniProtKB/Swiss-Prot;Acc:Q11088]	|	1.47046	0.00505	0.0191
WBGene00018373	F43B10.1	20.666	50.427	|			|	1.46858	1.94e-21	1.65e-19
WBGene00015652	srz-79	32.666	80.688	|	Chemoreceptor;Chemoreceptor: Srz class	Serpentine Receptor, class Z [Source:UniProtKB/TrEMBL;Acc:O44460]	|	1.46797	1.01e-17	6e-16
WBGene00000285	cal-1	6.128	15.068	|	Calcium binding protein;Calcium binding protein: Calmodulin family	Calmodulin-like protein [Source:UniProtKB/Swiss-Prot;Acc:P04630]	|	1.46732	4.97e-06	4.97e-05
WBGene00015921	C17H11.1	6.444	15.945	|	Neuropeptide receptors;Neuropeptide receptors: Related family with fly ortholog 1		|	1.46651	6.05e-15	2.71e-13
WBGene00019713	pqn-52	11.6	28.168	|		Prion-like-(Q/N-rich)-domain-bearing protein [Source:UniProtKB/TrEMBL;Acc:H2L044]	|	1.45729	3.48e-21	2.92e-19
WBGene00008783	F14B6.2	49.82	121.298	|			|	1.45308	6.07e-40	1.52e-37
WBGene00018702	F52E4.5	27.609	67.39	|			|	1.45266	1.32e-18	8.55e-17
WBGene00011292	allo-1	55.996	137.303	|		Allophagy receptor allo-1 [Source:UniProtKB/Swiss-Prot;Acc:Q9U389]	|	1.45149	3.39e-14	1.36e-12
WBGene00020662	T21H3.1	6.589	16.136	|			|	1.45141	4.55e-05	0.000352
WBGene00018606	F48E3.6	25.684	62.136	|			|	1.44824	1.29e-19	9.42e-18
WBGene00004321	rcan-1	31.054	75.455	|		Calcipressin-like protein [Source:UniProtKB/Swiss-Prot;Acc:P53806]	|	1.44704	1.66e-20	1.32e-18
WBGene00019801	aak-1	8.518	20.814	|		5'-AMP-activated protein kinase catalytic subunit alpha-1 [Source:UniProtKB/Swiss-Prot;Acc:P45894]	|	1.44691	4.69e-15	2.12e-13
WBGene00006804	unc-71	9.127	22.243	|		Disintegrin and metalloproteinase domain-containing protein unc-71 [Source:UniProtKB/Swiss-Prot;Acc:G5EFD5]	|	1.44611	9.74e-12	2.92e-10
WBGene00007675	C18D4.6	34.097	83.37	|			|	1.44611	9.63e-13	3.24e-11
WBGene00008513	F02A9.1	11.565	28.025	|			|	1.4458	4.16e-06	4.23e-05
WBGene00004101	hgrs-1	20.109	49.05	|		Hepatocyte Growth factor-Regulated TK Substrate (HRS) family [Source:UniProtKB/TrEMBL;Acc:Q17796]	|	1.44383	4.74e-14	1.87e-12
WBGene00017652	F21C10.1	96.378	233.743	|			|	1.44373	1.34e-08	2.44e-07
WBGene00001934	his-60	14.795	35.851	|		Histone H4 [Source:UniProtKB/Swiss-Prot;Acc:P62784]	|	1.43804	0.00014	0.000934
WBGene00022668	ZK154.6	138.025	336.27	|			|	1.43629	6.56e-07	8.19e-06
WBGene00045394	ZK813.7	26.151	63.48	|			|	1.43572	0.000101	0.0007
WBGene00007168	B0393.3	21.739	52.341	|			|	1.43472	1.52e-10	3.76e-09
WBGene00013468	srz-96	17.262	41.933	|	Chemoreceptor;Chemoreceptor: Srz class	Serpentine Receptor, class Z [Source:UniProtKB/TrEMBL;Acc:Q9XXP7]	|	1.43359	3.39e-10	7.99e-09
WBGene00013066	Y51A2B.2	13.832	33.458	|			|	1.43254	7.82e-06	7.46e-05
WBGene00077629	K10G4.13	8.01	19.418	|			|	1.42859	2.45e-07	3.39e-06
WBGene00021005	ule-1	9.182	22.313	|		Uterine Lumin Expressed/locailized [Source:UniProtKB/TrEMBL;Acc:X5M5P2]	|	1.42813	0.00486	0.0185
WBGene00013195	Y54E2A.10	5.934	14.222	|	Auxiliary subunit for:: nAChR LGIC		|	1.42638	2.61e-07	3.57e-06
WBGene00005182	srg-25	28.016	67.127	|	Chemoreceptor;Chemoreceptor: Srg class	Serpentine receptor class gamma [Source:UniProtKB/TrEMBL;Acc:Q23035]	|	1.42529	1.27e-15	6.18e-14
WBGene00006392	taf-10	6.381	15.256	|		Transcription initiation factor TFIID subunit 10 [Source:UniProtKB/TrEMBL;Acc:Q95ZS0]	|	1.42335	7.77e-06	7.44e-05
WBGene00018544	nhr-188	251.895	601.971	|		Nuclear Hormone Receptor family [Source:UniProtKB/TrEMBL;Acc:A0A168H5N7]	|	1.42196	2.78e-19	1.94e-17
WBGene00023470	srz-87	8.226	19.648	|			|	1.41772	3.34e-08	5.65e-07
WBGene00020556	pamn-1	7.009	16.64	|	Neuropeptide processing;Neuropeptide processing: Modification	Probable peptidyl-glycine alpha-amidating monooxygenase pamn-1 Probable peptidylglycine alpha-hydroxylating monooxygenase Probable peptidyl-alpha-hydroxyglycine alpha-amidating lyase [Source:UniProtKB/Swiss-Prot;Acc:P83388]	|	1.41703	9.78e-14	3.73e-12
WBGene00012962	dmsr-5	11.937	28.38	|	Neuropeptide receptors;Neuropeptide receptors: Drosophila Dromyosuppressin receptor family	DroMyoSuppressin Receptor related [Source:UniProtKB/TrEMBL;Acc:Q9XXD5]	|	1.41641	2.36e-17	1.35e-15
WBGene00018318	F41H10.5	8.976	21.333	|			|	1.41597	1.21e-06	1.42e-05
WBGene00001441	fkh-9	12.811	30.339	|		ForKHead transcription factor family [Source:UniProtKB/TrEMBL;Acc:Q2L6X6]	|	1.41549	3.78e-15	1.73e-13
WBGene00017366	F10G2.7	4.946	11.806	|			|	1.41516	0.000346	0.00202
WBGene00015955	C18B2.4	125.443	299.137	|			|	1.41502	1.96e-07	2.78e-06
WBGene00005296	srh-75	50.065	119.969	|	Chemoreceptor;Chemoreceptor: Srh class	Serpentine Receptor, class H [Source:UniProtKB/TrEMBL;Acc:Q7JKP7]	|	1.414	2.47e-07	3.41e-06
WBGene00015654	srz-77	27.844	66.54	|			|	1.41215	1.34e-11	3.93e-10
WBGene00018532	F47B7.1	7.542	17.558	|		UPF0057 membrane protein F47B7.1 [Source:UniProtKB/Swiss-Prot;Acc:Q20516]	|	1.40502	0.000329	0.00193
WBGene00001450	flp-7	18.492	42.749	|	Neuropeptide;Neuropeptide: FMRFamides (31 flp genes)	FMRFamide-like neuropeptides 7 TPMQRSSMVRF-amide 1 SPMQRSSMVRF-amide 1 SPMQRSSMVRF-amide 2 SPMQRSSMVRF-amide 3 SPMERSAMVRF-amide SPMDRSKMVRF-amide SSIDRASMVRL-amide TPMQRSSMVRF-amide 2 [Source:UniProtKB/Swiss-Prot;Acc:G5EEC2]	|	1.39789	1.52e-10	3.76e-09
WBGene00008439	mfb-1	18.746	44.049	|		MAFBx (F-box) protein homolog [Source:UniProtKB/TrEMBL;Acc:O45323]	|	1.39054	1.25e-15	6.1e-14
WBGene00009937	lsl-1	8.603	20.065	|		LSY-2-Like [Source:UniProtKB/TrEMBL;Acc:O02273]	|	1.38973	1.61e-11	4.63e-10
WBGene00009814	F47B10.3	91.891	214.869	|			|	1.38012	1.5e-07	2.18e-06
WBGene00013736	gtf-2A2	15.551	35.935	|		Transcription initiation factor IIA subunit 2 [Source:UniProtKB/Swiss-Prot;Acc:Q9NEX2]	|	1.37865	6.13e-07	7.69e-06
WBGene00011962	T23G5.2	59.147	136.534	|		CRAL-TRIO domain-containing protein T23G5.2 [Source:UniProtKB/Swiss-Prot;Acc:Q03606]	|	1.37797	3.95e-38	8.97e-36
WBGene00016033	C24A3.2	16.443	38.293	|			|	1.37359	2.34e-05	0.000196
WBGene00014989	best-23	11.624	26.808	|	Chloride channel;Chloride channel: bestrophin-related	Bestrophin homolog [Source:UniProtKB/TrEMBL;Acc:A5JYR2]	|	1.37278	6.31e-10	1.43e-08
WBGene00015008	lmd-2	7.097	16.295	|		LysM Domain (Peptidoglycan binding) protein [Source:UniProtKB/TrEMBL;Acc:O02055]	|	1.37109	8.07e-06	7.67e-05
WBGene00005415	srh-204	70.525	163.219	|	Chemoreceptor;Chemoreceptor: Srh class	Serpentine Receptor, class H [Source:UniProtKB/TrEMBL;Acc:O44541]	|	1.36768	6.82e-09	1.3e-07
WBGene00015175	srz-4	44.719	103.396	|	Chemoreceptor;Chemoreceptor: Srz class	Serpentine Receptor, class Z [Source:UniProtKB/TrEMBL;Acc:O01838]	|	1.36743	5.82e-05	0.000436
WBGene00005388	srh-172	11.91	27.41	|	Chemoreceptor;Chemoreceptor: Srh class	Serpentine Receptor, class H [Source:UniProtKB/TrEMBL;Acc:Q9U1Z7]	|	1.35629	0.000344	0.00201
WBGene00008984	F20E11.7	10.679	24.463	|			|	1.35552	3.06e-08	5.23e-07
WBGene00007779	C27D8.3	6.136	13.928	|			|	1.35475	2.41e-14	9.93e-13
WBGene00016096	C25E10.7	49.52	112.262	|			|	1.35458	4.17e-08	6.93e-07
WBGene00007599	C15A11.7	15.651	35.251	|			|	1.35266	1.71e-13	6.38e-12
WBGene00017756	F23F12.12	6.883	15.502	|			|	1.35063	2.19e-07	3.07e-06
WBGene00001665	gpa-3	66.641	151.809	|	GPCR signalling;GPCR signalling: Gα	Guanine nucleotide-binding protein alpha-3 subunit [Source:UniProtKB/Swiss-Prot;Acc:P28052]	|	1.34482	2.04e-19	1.45e-17
WBGene00005578	sri-66	132.842	297.957	|	Chemoreceptor;Chemoreceptor: Sri class	Serpentine Receptor, class I [Source:UniProtKB/TrEMBL;Acc:O45416]	|	1.34404	3.74e-22	3.37e-20
WBGene00012855	Y44A6D.5	33.503	75.357	|		Branched-chain-amino-acid aminotransferase [Source:UniProtKB/TrEMBL;Acc:Q9XXD8]	|	1.33584	5.06e-27	6.58e-25
WBGene00000004	aat-3	10.582	23.667	|		Amino Acid Transporter [Source:UniProtKB/TrEMBL;Acc:A0A0K3AVL7]	|	1.33182	2.65e-10	6.34e-09
WBGene00010007	F53H4.2	5.08	11.399	|			|	1.32944	0.00187	0.00842
WBGene00009542	copb-2	33.104	73.755	|		Probable coatomer subunit beta' [Source:UniProtKB/Swiss-Prot;Acc:Q20168]	|	1.32918	2.41e-17	1.38e-15
WBGene00018260	cyp-33C7	11.092	25.003	|		CYtochrome P450 family [Source:UniProtKB/TrEMBL;Acc:O16673]	|	1.32806	9.59e-11	2.45e-09
WBGene00014957	Y102A5C.30	22.259	50.271	|			|	1.32138	0.000117	0.000795
WBGene00016366	nhr-140	34.466	77.163	|		Nuclear Hormone Receptor family [Source:UniProtKB/TrEMBL;Acc:Q18394]	|	1.32044	7.31e-17	4.01e-15
WBGene00019663	K11H12.7	23.62	51.897	|			|	1.31879	8.99e-12	2.7e-10
WBGene00007405	C07A9.9	82.783	183.952	|			|	1.31869	5.54e-19	3.75e-17
WBGene00003043	lip-1	36.709	81.882	|		Dual specificity protein phosphatase lip-1 [Source:UniProtKB/Swiss-Prot;Acc:V6CIV8]	|	1.31315	4.29e-07	5.61e-06
WBGene00005464	srh-258	21.182	47.054	|	Chemoreceptor;Chemoreceptor: Srh class	Serpentine Receptor, class H [Source:UniProtKB/TrEMBL;Acc:O45761]	|	1.31267	5.22e-13	1.82e-11
WBGene00016610	paqr-1	17.87	39.561	|		Progestin and adipoQ receptor-like protein 1 [Source:UniProtKB/Swiss-Prot;Acc:Q94177]	|	1.31077	8.92e-15	3.9e-13
WBGene00020142	aak-2	36.362	80.513	|		5'-AMP-activated protein kinase catalytic subunit alpha-2 [Source:UniProtKB/Swiss-Prot;Acc:Q95ZQ4]	|	1.30993	9.34e-13	3.16e-11
WBGene00005351	srh-134	10.811	23.964	|	Chemoreceptor;Chemoreceptor: Srh class	Serpentine Receptor, class H [Source:UniProtKB/TrEMBL;Acc:Q9GRY7]	|	1.30919	7.21e-06	6.97e-05
WBGene00004893	sms-2	22.719	50.232	|		Phosphatidylcholine:ceramide cholinephosphotransferase 2 [Source:UniProtKB/Swiss-Prot;Acc:Q20735]	|	1.30896	5.46e-06	5.42e-05
WBGene00022820	ZK813.1	51.038	114.127	|			|	1.30619	0.00106	0.00524
WBGene00013695	epg-8	13.366	29.591	|		Ectopic P Granules [Source:UniProtKB/TrEMBL;Acc:Q9XWQ4]	|	1.30463	9.67e-11	2.47e-09
WBGene00011938	alh-13	8.688	19.353	|		Probable delta-1-pyrroline-5-carboxylate synthase Glutamate 5-kinase Gamma-glutamyl phosphate reductase [Source:UniProtKB/Swiss-Prot;Acc:P54889]	|	1.30119	4.74e-07	6.11e-06
WBGene00015283	C01B10.9	7.658	16.716	|			|	1.29716	1.49e-09	3.18e-08
WBGene00019389	irld-40	94.407	205.014	|	Insulin/EGF receptor-like;Insulin/EGF receptor-like: secreted	Insulin/EGF-Receptor L Domain protein [Source:UniProtKB/TrEMBL;Acc:Q9TXL4]	|	1.294	2.51e-13	9.08e-12
WBGene00010573	K04H4.2	13.591	29.719	|			|	1.29124	6.09e-26	7.42e-24
WBGene00005234	srh-8	9.997	21.86	|	Chemoreceptor;Chemoreceptor: Srh class	Serpentine Receptor, class H [Source:UniProtKB/TrEMBL;Acc:Q9N5I7]	|	1.28836	1.29e-07	1.91e-06
WBGene00013907	sre-20	153.126	331.708	|	Chemoreceptor;Chemoreceptor: Sre class	Serpentine Receptor, class E (Epsilon) [Source:UniProtKB/TrEMBL;Acc:G3MU24]	|	1.28547	3.76e-13	1.33e-11
WBGene00009231	ceh-89	7.133	15.432	|		C. Elegans Homeobox [Source:UniProtKB/TrEMBL;Acc:Q9XX95]	|	1.28348	5.27e-11	1.41e-09
WBGene00019805	R01B10.3	4.985	10.798	|			|	1.2817	0.0146	0.0459
WBGene00016834	sre-50	4.785	10.314	|	Chemoreceptor;Chemoreceptor: Sre class	Serpentine Receptor, class E (Epsilon) [Source:UniProtKB/TrEMBL;Acc:A3QMA9]	|	1.28129	8.41e-08	1.3e-06
WBGene00008412	D2030.2	10.001	21.604	|			|	1.27904	6.34e-10	1.44e-08
WBGene00011429	T04C12.7	17.803	39.047	|			|	1.27826	0.000133	0.000889
WBGene00011815	bath-43	13.454	28.908	|		BTB and MATH domain-containing protein 43 [Source:UniProtKB/Swiss-Prot;Acc:P34568]	|	1.27408	6.19e-15	2.76e-13
WBGene00077698	lurp-4	330.916	712.183	|	Auxiliary subunit for:: nAChR LGIC	LU (Ly6 Urokinase plasminogen) domain Receptor-related Protein [Source:UniProtKB/TrEMBL;Acc:B2D6N2]	|	1.271	3.18e-13	1.13e-11
WBGene00010200	F57C7.4	55.961	119.468	|			|	1.26983	5.38e-27	6.93e-25
WBGene00017724	F22F7.7	13.878	29.605	|		Gamma-glutamylcyclotransferase [Source:UniProtKB/TrEMBL;Acc:A0A0K3ARZ2]	|	1.26931	5.57e-13	1.93e-11
WBGene00015009	B0041.5	25.858	55.225	|			|	1.26745	5.95e-13	2.05e-11
WBGene00044646	B0205.14	996.827	2153.56	|			|	1.26612	4.69e-09	9.18e-08
WBGene00013276	sre-42	114.931	247.261	|	Chemoreceptor;Chemoreceptor: Sre class	Serpentine Receptor, class E (Epsilon) [Source:UniProtKB/TrEMBL;Acc:Q9XWH7]	|	1.2612	3.01e-10	7.13e-09
WBGene00003689	nhr-99	7.432	15.696	|		Nuclear Hormone Receptor family [Source:UniProtKB/TrEMBL;Acc:Q966H4]	|	1.26067	8.32e-07	1.02e-05
WBGene00006811	unc-79	17.201	36.723	|	Auxiliary subunit for:: Voltage-gated calcium channels	Uncoordinated protein 79 [Source:UniProtKB/Swiss-Prot;Acc:P42173]	|	1.26022	1.18e-21	1.02e-19
WBGene00012362	W09D10.4	7.844	16.816	|			|	1.25973	4.29e-08	7.11e-07
WBGene00022552	ZC196.9	29.579	62.759	|			|	1.25947	1.74e-07	2.5e-06
WBGene00007458	ule-4	275.225	588.583	|		UPF0375 protein ule-4 [Source:UniProtKB/Swiss-Prot;Acc:O62053]	|	1.25686	2.14e-07	3e-06
WBGene00007288	C04A11.5	18.277	38.817	|			|	1.25514	2.6e-07	3.56e-06
WBGene00019521	dmd-7	25.097	53.636	|		DM (Doublesex/MAB-3) Domain family [Source:UniProtKB/TrEMBL;Acc:Q8MPU2]	|	1.25404	5.22e-07	6.65e-06
WBGene00017621	F20A1.10	21.107	45.553	|			|	1.25308	0.0117	0.0382
WBGene00000268	bre-3	43.802	93.507	|		Beta-1,4-mannosyltransferase bre-3 [Source:UniProtKB/Swiss-Prot;Acc:Q03562]	|	1.25045	3.83e-08	6.45e-07
WBGene00014220	ZK1098.3	15.128	32.182	|			|	1.24994	2.09e-13	7.69e-12
WBGene00013164	Y53F4B.18	26.704	56.357	|			|	1.24991	1.71e-16	9.14e-15
WBGene00008558	F07H5.7	9.742	20.607	|			|	1.24708	1.35e-07	1.99e-06
WBGene00016172	C27H5.2	10.862	22.715	|			|	1.24697	1.59e-06	1.8e-05
WBGene00019840	R02F11.2	532.183	1120.96	|			|	1.24533	2.72e-15	1.28e-13
WBGene00003218	mep-1	36.842	77.888	|		MOG interacting and ectopic P-granules protein 1 [Source:UniProtKB/Swiss-Prot;Acc:Q21502]	|	1.24327	2.14e-18	1.33e-16
WBGene00021497	Y40C5A.4	7.943	16.705	|	Neuropeptide receptors;Neuropeptide receptors: Another Drosophila FMRFamide receptor family		|	1.2421	1.83e-16	9.7e-15
WBGene00017286	F09E5.8	26.126	54.957	|		Pyridoxal phosphate homeostasis protein [Source:UniProtKB/Swiss-Prot;Acc:P52057]	|	1.23926	1.91e-13	7.05e-12
WBGene00016739	pitr-1	28.165	59.593	|		Phosphate transporter [Source:UniProtKB/TrEMBL;Acc:Q18697]	|	1.23873	4.07e-07	5.37e-06
WBGene00014214	ZK1073.2	47.979	99.557	|			|	1.23465	6.36e-11	1.67e-09
WBGene00017291	F09E5.14	9.367	19.682	|			|	1.23239	0.00057	0.00313
WBGene00044068	syd-9	153.543	320.565	|			|	1.23163	2.16e-16	1.14e-14
WBGene00010085	F55B11.3	12.188	25.415	|			|	1.23148	0.00306	0.0127
WBGene00016961	vps-32.1	70.126	147.798	|		Related to yeast Vacuolar Protein Sorting factor [Source:UniProtKB/TrEMBL;Acc:Q18886]	|	1.2298	7.26e-08	1.14e-06
WBGene00015167	B0403.3	84.547	177.556	|			|	1.22777	1.32e-09	2.86e-08
WBGene00009574	F40E10.6	119.398	248.212	|			|	1.22763	1.41e-18	9.07e-17
WBGene00005245	srh-20	47.36	99.476	|	Chemoreceptor;Chemoreceptor: Srh class	Serpentine Receptor, class H [Source:UniProtKB/TrEMBL;Acc:O16432]	|	1.22486	6.54e-05	0.000482
WBGene00019117	nhr-144	15.83	32.905	|			|	1.22379	8.28e-06	7.85e-05
WBGene00022821	ZK813.2	15.556	32.177	|			|	1.22017	1.08e-05	9.99e-05
WBGene00021236	pud-1.2	19.192	40.201	|		Protein Up-regulated in Daf-2(Gf) [Source:UniProtKB/TrEMBL;Acc:G5EET8]	|	1.21962	0.000474	0.00266
WBGene00007185	nlp-36	17.437	35.676	|	Neuropeptide;Neuropeptide: Neuropeptide-like proteins	Neuropeptide-like peptide 36 [Source:UniProtKB/Swiss-Prot;Acc:Q03561]	|	1.21692	0.000756	0.00397
WBGene00019686	K12H6.6	14.46	29.905	|			|	1.21662	1.1e-10	2.78e-09
WBGene00000214	asp-1	12.725	26.429	|		ASpartyl Protease; Aspartic protease 1 [Source:UniProtKB/TrEMBL;Acc:G5EEI4]	|	1.21506	1.11e-06	1.31e-05
WBGene00017193	F07C3.2	8.555	17.598	|			|	1.21273	2.18e-05	0.000185
WBGene00023465	srz-81	17.725	36.951	|			|	1.21219	4.58e-07	5.94e-06
WBGene00001627	gly-2	5.922	12.158	|		Alpha-1,6-mannosylglycoprotein 6-beta-N-acetylglucosaminyltransferase [Source:UniProtKB/Swiss-Prot;Acc:Q9NDH7]	|	1.20874	1.36e-06	1.57e-05
WBGene00015053	B0222.1	786.916	1613.68	|			|	1.2058	9.18e-09	1.72e-07
WBGene00006638	tsp-12	7.744	15.994	|		Tetraspanin-12 [Source:UniProtKB/Swiss-Prot;Acc:Q22495]	|	1.20423	3.7e-09	7.4e-08
WBGene00004921	snt-1	61.927	126.427	|	Synaptic release machinery;Synaptic release machinery: synaptotagmin	Synaptotagmin-1 [Source:UniProtKB/Swiss-Prot;Acc:P34693]	|	1.20257	1.21e-32	2.08e-30
WBGene00017420	F13B9.2	9.848	20.43	|			|	1.20217	0.00416	0.0163
WBGene00004088	ppk-2	35.593	72.826	|		PIP Kinase [Source:UniProtKB/TrEMBL;Acc:Q9BL73]	|	1.20176	9.36e-26	1.12e-23
WBGene00012089	T27E7.4	134.094	274.357	|			|	1.1974	1.64e-11	4.69e-10
WBGene00001936	his-62	10.736	22.145	|		Probable histone H2B 4 [Source:UniProtKB/Swiss-Prot;Acc:Q27876]	|	1.19384	0.00295	0.0123
WBGene00000786	cpr-6	5.18	10.523	|		Cathepsin B-like cysteine proteinase 6 [Source:UniProtKB/Swiss-Prot;Acc:P43510]	|	1.19366	5.09e-07	6.51e-06
WBGene00018009	dhhc-3	11.856	24.134	|		Palmitoyltransferase [Source:UniProtKB/TrEMBL;Acc:Q95X59]	|	1.19333	8.8e-14	3.38e-12
WBGene00017190	F07B7.12	26.278	54.457	|			|	1.19132	0.00121	0.00584
WBGene00016796	cec-2	9.665	19.856	|		C.Elegans Chromodomain protein [Source:UniProtKB/TrEMBL;Acc:U4PMK7]	|	1.19102	5.41e-09	1.05e-07
WBGene00006816	unc-84	16.217	32.782	|		Nuclear migration and anchoring protein unc-84 [Source:UniProtKB/Swiss-Prot;Acc:Q20745]	|	1.18996	7.21e-16	3.59e-14
WBGene00044174	fipr-5	16.834	33.788	|		FIP (Fungus-Induced Protein) Related [Source:UniProtKB/TrEMBL;Acc:Q565A0]	|	1.18981	0.00045	0.00254
WBGene00008224	slrp-1	12.402	25.319	|		Sra (SRA) stem-Loop interacting Rna (RNA) binding Protein homolog [Source:UniProtKB/TrEMBL;Acc:Q18724]	|	1.18929	1.94e-06	2.14e-05
WBGene00019847	R03G5.6	8.899	18.206	|			|	1.18878	2.1e-07	2.95e-06
WBGene00022664	ZK121.2	27	54.964	|			|	1.18747	1.37e-09	2.95e-08
WBGene00020560	T19C3.2	25.556	51.938	|			|	1.187	2.03e-05	0.000173
WBGene00044004	C24A8.6	60.075	121.096	|			|	1.18662	2.16e-11	6.1e-10
WBGene00017854	F27C1.4	9.6	19.575	|			|	1.18307	4.41e-05	0.000342
WBGene00003989	pfn-1	106.369	216.944	|		Profilin-1 [Source:UniProtKB/Swiss-Prot;Acc:Q9XW16]	|	1.18126	1.5e-08	2.72e-07
WBGene00001753	gst-5	14200.3	28715.3	|		Probable glutathione S-transferase 5 [Source:UniProtKB/Swiss-Prot;Acc:Q09596]	|	1.17756	8.54e-08	1.31e-06
WBGene00009844	cwp-5	174.345	349.965	|		Coexpressed With Polycystins [Source:UniProtKB/TrEMBL;Acc:B6VQ87]	|	1.1773	6.48e-24	6.96e-22
WBGene00014190	irld-62	113.57	227.831	|	Insulin/EGF receptor-like;Insulin/EGF receptor-like: secreted	Insulin/EGF-Receptor L Domain protein [Source:UniProtKB/TrEMBL;Acc:O45984]	|	1.17622	4.53e-14	1.8e-12
WBGene00022425	plst-1	25.271	51.11	|		PLaSTin (Actin bundling protein) homolog [Source:UniProtKB/TrEMBL;Acc:U4PMA7]	|	1.17271	1.43e-09	3.06e-08
WBGene00008454	E02A10.4	779.382	1561.77	|			|	1.17203	4.26e-20	3.21e-18
WBGene00022144	pghm-1	2239.83	4475.34	|	Neuropeptide processing;Neuropeptide processing: Modification	Probable peptidylglycine alpha-hydroxylating monooxygenase 1 [Source:UniProtKB/Swiss-Prot;Acc:Q95XM2]	|	1.1716	1.23e-21	1.06e-19
WBGene00004749	sdn-1	11.205	22.441	|		Probable syndecan [Source:UniProtKB/Swiss-Prot;Acc:P50605]	|	1.17153	3.14e-15	1.46e-13
WBGene00010329	F59D12.1	59.513	118.964	|	Neuropeptide receptors;Neuropeptide receptors: "DmDopEcR ortholog		|	1.17055	4.67e-22	4.16e-20
WBGene00018110	F36H9.1	49.742	98.973	|			|	1.17034	1.4e-07	2.06e-06
WBGene00003144	max-2	13.817	27.714	|		Serine/threonine-protein kinase max-2 [Source:UniProtKB/Swiss-Prot;Acc:G5EGQ3]	|	1.16853	7.27e-08	1.14e-06
WBGene00006431	tag-52	6.593	13.263	|			|	1.16487	7.26e-06	7e-05
WBGene00019180	H10D18.5	36.403	72.527	|			|	1.16431	4.68e-08	7.68e-07
WBGene00009042	F22B5.4	36.217	72.628	|			|	1.16323	0.000228	0.00141
WBGene00014213	ZK1073.1	95.173	189.378	|			|	1.16319	2.83e-08	4.87e-07
WBGene00014080	atg-4.2	5.811	11.45	|		Cysteine protease [Source:UniProtKB/TrEMBL;Acc:Q9U1N6]	|	1.16222	3.24e-06	3.39e-05
WBGene00012365	W09G3.1	7.431	14.856	|			|	1.16146	1.98e-05	0.000169
WBGene00004922	snt-2	6.58	13.16	|	Synaptic release machinery;Synaptic release machinery: synaptotagmin	Synaptotagmin 2 [Source:UniProtKB/Swiss-Prot;Acc:K8FE10]	|	1.16144	4.16e-07	5.47e-06
WBGene00009578	F40F8.5	123.812	245.925	|			|	1.1607	2.24e-31	3.58e-29
WBGene00021510	frpr-19	81.318	161.593	|	Neuropeptide receptors;Neuropeptide receptors: Drosophila FMRFamide receptor family	FMRFamide Peptide Receptor family [Source:UniProtKB/TrEMBL;Acc:U4PC84]	|	1.15568	2.34e-08	4.07e-07
WBGene00005228	srh-2	36.088	72.31	|	Chemoreceptor;Chemoreceptor: Srh class	Serpentine Receptor, class H [Source:UniProtKB/TrEMBL;Acc:H2KYH0]	|	1.1543	0.000348	0.00202
WBGene00021883	Y54G2A.18	64.163	126.838	|		4D656 [Source:UniProtKB/TrEMBL;Acc:G5EBI0]	|	1.15367	1.21e-10	3.04e-09
WBGene00010693	K08H2.7	24.924	49.275	|			|	1.15271	2.79e-06	2.97e-05
WBGene00003627	nhr-34	11.321	22.417	|		Nuclear hormone receptor family member nhr-34 [Source:UniProtKB/Swiss-Prot;Acc:Q21006]	|	1.15238	1.42e-11	4.11e-10
WBGene00011849	T19H5.4	21.284	42.483	|			|	1.1521	3.37e-05	0.00027
WBGene00005439	srh-231	18.123	36.1	|	Chemoreceptor;Chemoreceptor: Srh class	Serpentine Receptor, class H [Source:UniProtKB/TrEMBL;Acc:O01450]	|	1.1508	6.84e-07	8.49e-06
WBGene00012286	sre-35	87.591	172.944	|	Chemoreceptor;Chemoreceptor: Sre class	Serpentine Receptor, class E (Epsilon) [Source:UniProtKB/TrEMBL;Acc:Q5FC42]	|	1.15066	5.68e-10	1.3e-08
WBGene00268193	ZK697.18	11.851	23.673	|			|	1.14875	0.00462	0.0177
WBGene00007892	C33B4.4	172.161	340.337	|			|	1.14114	5.29e-08	8.57e-07
WBGene00002981	lgg-2	47.862	94.503	|			|	1.14089	6.86e-10	1.54e-08
WBGene00008665	ercc-1	18.996	37.379	|		ERCC (DNA excision repair protein) homolog [Source:UniProtKB/TrEMBL;Acc:Q93456]	|	1.13956	1.14e-11	3.41e-10
WBGene00011737	sqst-1	186.687	368.33	|		SeQueSTosome related [Source:UniProtKB/TrEMBL;Acc:F1LIM5]	|	1.13839	8.68e-12	2.63e-10
WBGene00007816	C30F2.2	182.634	356.962	|			|	1.13587	3.9e-15	1.78e-13
WBGene00020716	phf-30	38.784	76.804	|		PHd Finger family [Source:UniProtKB/TrEMBL;Acc:O17006]	|	1.13481	1.98e-05	0.000169
WBGene00019408	K05F1.6	26.332	51.395	|			|	1.13355	1.03e-24	1.17e-22
WBGene00013393	Y62H9A.5	45.992	90.89	|			|	1.1319	0.0124	0.04
WBGene00010131	F55H2.5	13.237	25.85	|		Putative cytochrome b561 [Source:UniProtKB/Swiss-Prot;Acc:P34465]	|	1.13132	7.82e-06	7.46e-05
WBGene00005180	srg-23	9.97	19.71	|	Chemoreceptor;Chemoreceptor: Srg class	Serpentine receptor class gamma [Source:UniProtKB/TrEMBL;Acc:Q9TYL6]	|	1.13065	0.00327	0.0134
WBGene00009632	ttyh-1	16.263	31.542	|	Chloride channel;Chloride channel: tweety-related		|	1.13043	1.11e-12	3.69e-11
WBGene00004112	pqn-22	8.176	15.931	|		Prion-like-(Q/N-rich)-domain-bearing protein [Source:UniProtKB/TrEMBL;Acc:V6CKH6]	|	1.13023	3.87e-07	5.12e-06
WBGene00022791	ZK686.1	8.845	17.328	|			|	1.12981	0.000125	0.000845
WBGene00017004	nrd-1	48.218	93.931	|		NRD (Yeast Nuclear pre-mRNA Down-regulation) homolog [Source:UniProtKB/TrEMBL;Acc:O01864]	|	1.12977	1.22e-10	3.07e-09
WBGene00016585	oac-59	13.445	26.385	|		O-ACyltransferase homolog [Source:UniProtKB/TrEMBL;Acc:D3TDG8]	|	1.12973	0.000163	0.00106
WBGene00004758	sek-1	15.261	29.759	|		Dual specificity mitogen-activated protein kinase kinase sek-1 [Source:UniProtKB/Swiss-Prot;Acc:G5EDF7]	|	1.12837	1.12e-10	2.84e-09
WBGene00044787	pals-36	6.607	13.035	|			|	1.12573	0.00022	0.00137
WBGene00012615	dct-16	113.164	218.135	|		DAF-16/FOXO Controlled, germline Tumor affecting [Source:UniProtKB/TrEMBL;Acc:D4YWC3]	|	1.12518	1.21e-05	0.00011
WBGene00013244	Y56A3A.33	7.008	13.597	|			|	1.12489	1.92e-07	2.72e-06
WBGene00008343	C56A3.4	40.925	79.692	|			|	1.12434	7.9e-06	7.53e-05
WBGene00011753	T13F3.6	69.341	134.236	|			|	1.12367	0.00193	0.00866
WBGene00010603	nhr-198	877.667	1721.92	|		Nuclear Hormone Receptor family [Source:UniProtKB/TrEMBL;Acc:O45664]	|	1.12304	6.6e-05	0.000486
WBGene00012555	npp-25	5.322	10.386	|		Transmembrane protein 33 homolog [Source:UniProtKB/Swiss-Prot;Acc:Q9XWV0]	|	1.12235	0.0108	0.0359
WBGene00003411	mrp-5	12.338	23.925	|	Auxiliary subunit for:: Voltage-gated K channels		|	1.12204	2.01e-14	8.4e-13
WBGene00009441	wdr-48	8.796	17.16	|		WD repeat-containing protein 48 homolog [Source:UniProtKB/Swiss-Prot;Acc:Q20059]	|	1.12193	1.87e-09	3.9e-08
WBGene00012948	dhhc-2	19.409	37.649	|		Palmitoyltransferase [Source:UniProtKB/TrEMBL;Acc:Q9XWD7]	|	1.11915	3.44e-09	6.91e-08
WBGene00006702	ubc-3	27.154	52.949	|		UBiquitin Conjugating enzyme [Source:UniProtKB/TrEMBL;Acc:W6RY98]	|	1.11914	4.87e-08	7.96e-07
WBGene00018430	nhr-142	16.247	31.698	|		Nuclear Hormone Receptor family [Source:UniProtKB/TrEMBL;Acc:J7SF93]	|	1.11904	1.56e-06	1.77e-05
WBGene00006705	ubc-8	11.836	22.957	|		UBiquitin Conjugating enzyme [Source:UniProtKB/TrEMBL;Acc:Q9N2W9]	|	1.11888	1.48e-07	2.16e-06
WBGene00022078	epg-9	8.98	17.359	|		Ectopic P Granules [Source:UniProtKB/TrEMBL;Acc:Q86DD3]	|	1.11719	5.4e-06	5.37e-05
WBGene00004769	sel-12	6.457	12.339	|		Presenilin sel-12 [Source:UniProtKB/Swiss-Prot;Acc:P52166]	|	1.1169	4.87e-07	6.24e-06
WBGene00017350	F10E7.9	90.324	173.129	|	SLC transporter;SLC transporter: SLC12: cation-chloride cotransporter family		|	1.11297	2.31e-19	1.62e-17
WBGene00005553	sri-41	40.867	79.016	|			|	1.11025	6.8e-08	1.07e-06
WBGene00016539	madd-2	26.264	50.686	|			|	1.10932	1.23e-11	3.62e-10
WBGene00005966	srx-75	9.186	17.843	|			|	1.10881	0.000771	0.00403
WBGene00014108	ZK856.7	6.761	12.998	|			|	1.10781	0.00854	0.0295
WBGene00005065	sra-39	11.175	21.286	|	Chemoreceptor;Chemoreceptor: Sra class	Serpentine receptor class alpha-39 [Source:UniProtKB/Swiss-Prot;Acc:O62420]	|	1.10771	4.66e-06	4.69e-05
WBGene00006066	sto-4	20.126	38.758	|	Auxiliary subunit for:: DEG/ENaC channels (and perhaps TRP)	Stomatin-4 [Source:UniProtKB/Swiss-Prot;Acc:Q22165]	|	1.10529	0.000135	0.000905
WBGene00003478	mtm-6	11.16	21.316	|		Myotubularin-related protein 6 [Source:UniProtKB/Swiss-Prot;Acc:G5ED68]	|	1.10527	1.59e-07	2.3e-06
WBGene00022075	Y69A2AR.3	11.721	21.95	|			|	1.10452	0.00359	0.0145
WBGene00022447	hpo-20	5.281	10.177	|		Phosphatidylinositol-glycan biosynthesis class W protein [Source:UniProtKB/TrEMBL;Acc:D6RYD7]	|	1.10204	0.00692	0.0249
WBGene00018371	ess-2	5.316	10.173	|		Splicing factor ESS-2 [Source:UniProtKB/Swiss-Prot;Acc:P34420]	|	1.10075	0.00439	0.017
WBGene00017513	F16F9.1	14.576	28.143	|			|	1.10028	8.24e-05	0.00059
WBGene00019156	H04M03.12	10.546	20.252	|			|	1.09997	8.99e-08	1.38e-06
WBGene00044665	F59A6.12	14.172	26.782	|			|	1.09762	0.0012	0.00584
WBGene00007553	C13G3.1	754.359	1448.72	|			|	1.0958	4.28e-05	0.000333
WBGene00014021	svop-1	18.314	34.685	|	Synaptic release machinery;Synaptic release machinery: SVOP	Putative transporter svop-1 [Source:UniProtKB/Swiss-Prot;Acc:P30638]	|	1.09462	4.65e-10	1.08e-08
WBGene00017326	dmd-5	41.639	80.292	|		DM (Doublesex/MAB-3) Domain family [Source:UniProtKB/TrEMBL;Acc:Q19291]	|	1.09355	0.000628	0.0034
WBGene00016471	srab-8	6.279	11.917	|	Chemoreceptor;Chemoreceptor: Srab class	Serpentine Receptor, class AB (Class A-like) [Source:UniProtKB/TrEMBL;Acc:O16412]	|	1.09207	8.64e-05	0.000614
WBGene00016278	erp-44.1	21.698	40.874	|		Endoplasmic Reticulum Protein homolog [Source:UniProtKB/TrEMBL;Acc:G5EFF8]	|	1.09164	2.7e-10	6.44e-09
WBGene00010735	frpr-15	10.71	20.141	|	Neuropeptide receptors;Neuropeptide receptors: Drosophila FMRFamide receptor family	FMRFamide Peptide Receptor family [Source:UniProtKB/TrEMBL;Acc:Q21413]	|	1.08947	5.98e-09	1.15e-07
WBGene00019055	F58F9.1	13.374	25.317	|			|	1.08921	3.88e-08	6.49e-07
WBGene00003163	mdl-1	115.567	219.112	|		MAD-Like; MAD-like-1 homolog [Source:UniProtKB/TrEMBL;Acc:G5EG44]	|	1.08822	2.99e-10	7.1e-09
WBGene00011873	T20G5.12	29.694	56.347	|			|	1.08611	3.78e-07	5.01e-06
WBGene00001630	gly-5	25.436	48.236	|		Polypeptide N-acetylgalactosaminyltransferase 5 [Source:UniProtKB/Swiss-Prot;Acc:Q95ZJ1]	|	1.08585	7.06e-13	2.42e-11
WBGene00003914	pam-1	81.757	153.704	|		Puromycin-sensitive aminopeptidase [Source:UniProtKB/Swiss-Prot;Acc:Q4TT88]	|	1.0813	2.76e-28	3.78e-26
WBGene00021692	Y48G8AL.15	11.732	22.049	|			|	1.08124	9.79e-05	0.000682
WBGene00005442	srh-235	24.862	47.443	|	Chemoreceptor;Chemoreceptor: Srh class	Serpentine Receptor, class H [Source:UniProtKB/TrEMBL;Acc:Q9XXP3]	|	1.07841	0.000973	0.00489
WBGene00011205	R10E4.9	13.325	25.043	|		Very-long-chain (3R)-3-hydroxyacyl-CoA dehydratase [Source:UniProtKB/TrEMBL;Acc:Q21905]	|	1.07823	6.41e-06	6.27e-05
WBGene00008555	F07C6.4	36.248	68.106	|			|	1.0722	2.52e-11	7.03e-10
WBGene00195084	C43C3.4	105.939	196.587	|			|	1.07213	5.95e-05	0.000444
WBGene00009394	clec-63	6.245	11.719	|		C-type LECtin [Source:UniProtKB/TrEMBL;Acc:O45444]	|	1.07211	0.000565	0.0031
WBGene00008975	F20D1.3	78.426	147.603	|			|	1.07203	1.74e-09	3.65e-08
WBGene00016315	C32D5.7	47.177	88.002	|			|	1.07016	1.77e-06	1.98e-05
WBGene00018700	lmd-3	25.085	47.571	|		LysM Domain (Peptidoglycan binding) protein [Source:UniProtKB/TrEMBL;Acc:Q3Y409]	|	1.06924	0.000225	0.00139
WBGene00019388	K04F1.9	32.389	60.325	|			|	1.06803	2.92e-06	3.09e-05
WBGene00017494	irld-31	53.999	100.298	|			|	1.06639	2.18e-11	6.16e-10
WBGene00020710	T23B3.2	156.9	292.951	|			|	1.06382	2.82e-08	4.86e-07
WBGene00023517	srz-75	31.823	59.353	|	Chemoreceptor;Chemoreceptor: Srz class	Serpentine Receptor, class Z [Source:UniProtKB/TrEMBL;Acc:Q5WRK6]	|	1.06196	1.04e-06	1.23e-05
WBGene00007630	har-1	65.326	122.493	|		Hemiasterlin resistant protein 1 [Source:UniProtKB/Swiss-Prot;Acc:Q09254]	|	1.06192	0.000585	0.00319
WBGene00018145	F37C4.5	158.664	296.559	|			|	1.06159	4.15e-10	9.67e-09
WBGene00006059	stc-1	35.886	66.329	|		STCH (Truncated HSP) family [Source:UniProtKB/TrEMBL;Acc:Q20752]	|	1.06095	4.35e-13	1.52e-11
WBGene00003182	mef-2	15.875	29.66	|		Related to vertebrate MEF2 transcription factor [Source:UniProtKB/TrEMBL;Acc:Q9U325]	|	1.06069	2.09e-06	2.29e-05
WBGene00013737	tpst-1	13.913	25.716	|		Protein-tyrosine sulfotransferase A [Source:UniProtKB/Swiss-Prot;Acc:O77081]	|	1.06002	1.37e-09	2.94e-08
WBGene00006405	itsn-1	53.325	99.287	|		ITSN (Intersectin) family [Source:UniProtKB/TrEMBL;Acc:E6N0W1]	|	1.0587	2.89e-17	1.64e-15
WBGene00008265	kcnl-4	90.837	168.706	|	Potassium Channel;Potassium Channel: Calcium-activated SK family	KCNN (Potassium K ChaNNel, calcium activated)-Like [Source:UniProtKB/TrEMBL;Acc:D5MCU0]	|	1.05555	4.84e-13	1.69e-11
WBGene00016658	C45B2.1	139.675	257.588	|			|	1.05365	0.00039	0.00224
WBGene00014017	ZK632.10	96.626	178.799	|		UPF0057 membrane protein ZK632.10 [Source:UniProtKB/Swiss-Prot;Acc:P34655]	|	1.05362	1.71e-10	4.18e-09
WBGene00021726	bath-10	9.416	17.309	|		BTB and MATH domain containing [Source:UniProtKB/TrEMBL;Acc:Q9TYJ1]	|	1.04872	0.000169	0.00109
WBGene00021756	Y50D7A.8	12.932	23.68	|			|	1.04827	4.11e-09	8.15e-08
WBGene00009007	otub-3	38.131	70.176	|		OTUBain deubiquitylating protease homolog [Source:UniProtKB/TrEMBL;Acc:Q19681]	|	1.04714	7.21e-15	3.19e-13
WBGene00002219	klp-7	31.691	58.252	|	Kinesin;Kinesin: Family:Kinesin-13;Kinesin: Function:chromosome segregation	Kinesin-like protein [Source:UniProtKB/TrEMBL;Acc:G5ED75]	|	1.04668	2.08e-12	6.77e-11
WBGene00013732	aakg-1	31.058	57.185	|		AMP-Activated protein Kinase Gamma subunit [Source:UniProtKB/TrEMBL;Acc:A0A1I6CM90]	|	1.04645	1e-13	3.82e-12
WBGene00003408	mrp-2	60.626	111.762	|	Auxiliary subunit for:: Voltage-gated K channels		|	1.0461	9.55e-18	5.69e-16
WBGene00017493	irld-30	213.853	390.489	|	Insulin/EGF receptor-like;Insulin/EGF receptor-like: secreted	Insulin/EGF-Receptor L Domain protein [Source:UniProtKB/TrEMBL;Acc:O44600]	|	1.04502	3.54e-11	9.71e-10
WBGene00015978	C18F10.7	47.766	87.763	|			|	1.0442	1.2e-09	2.62e-08
WBGene00008213	C49F8.1	9.557	17.642	|			|	1.04402	3.3e-05	0.000266
WBGene00016803	bath-42	29.141	53.716	|		BTB and MATH domain-containing protein 42 [Source:UniProtKB/Swiss-Prot;Acc:P34371]	|	1.04388	4.18e-09	8.29e-08
WBGene00006662	twk-7	9.89	18.148	|	Potassium Channel;Potassium Channel: TWK Channel family	TWiK family of potassium channels protein 7 [Source:UniProtKB/Swiss-Prot;Acc:P34410]	|	1.04319	1.24e-06	1.45e-05
WBGene00010440	ttr-51	7.543	13.523	|		TransThyretin-Related family domain [Source:UniProtKB/TrEMBL;Acc:O62289]	|	1.04237	0.0101	0.034
WBGene00015776	dct-1	19.002	35.031	|		NIP3 homolog [Source:UniProtKB/Swiss-Prot;Acc:Q09969]	|	1.041	1.73e-07	2.49e-06
WBGene00010604	nhr-199	35.26	65.072	|		Nuclear hormone receptor family member nhr-199 [Source:UniProtKB/Swiss-Prot;Acc:O17934]	|	1.03937	5.41e-09	1.05e-07
WBGene00015580	cls-1	14.156	25.87	|			|	1.03754	6.43e-22	5.7e-20
WBGene00000518	ckk-1	13.922	25.519	|		Calcium/calmodulin-dependent protein kinase kinase [Source:UniProtKB/Swiss-Prot;Acc:Q3Y416]	|	1.03729	1.16e-07	1.73e-06
WBGene00016925	srb-18	16.803	31.197	|	Chemoreceptor;Chemoreceptor: Srb class	Serpentine receptor class beta-18 [Source:UniProtKB/Swiss-Prot;Acc:O16444]	|	1.03673	0.00325	0.0133
WBGene00016365	nhr-139	26.242	48.065	|		Nuclear Hormone Receptor family [Source:UniProtKB/TrEMBL;Acc:Q18393]	|	1.03385	5.62e-12	1.74e-10
WBGene00016503	C37C3.11	24.817	45.494	|			|	1.03259	3.54e-05	0.000282
WBGene00001032	dnj-14	9.419	17.045	|	Synaptic release machinery;Synaptic release machinery: CSP alpha	DNaJ domain (Prokaryotic heat shock protein) [Source:UniProtKB/TrEMBL;Acc:E5QCE7]	|	1.03176	0.000555	0.00305
WBGene00008518	irld-2	25.094	46.347	|	Insulin/EGF receptor-like;Insulin/EGF receptor-like: transmembrane or membrane associated	Insulin/EGF-Receptor L Domain protein [Source:UniProtKB/TrEMBL;Acc:Q19110]	|	1.0314	0.00702	0.0252
WBGene00268194	F36H9.10	15.808	28.535	|			|	1.03129	9.07e-06	8.51e-05
WBGene00010539	ttr-2	8.57	15.605	|		Transthyretin-like protein 2 [Source:UniProtKB/Swiss-Prot;Acc:P34500]	|	1.03027	0.0124	0.04
WBGene00001645	gly-20	9.263	16.761	|		GLYcosylation related [Source:UniProtKB/TrEMBL;Acc:O17560]	|	1.02964	6.53e-07	8.17e-06
WBGene00020299	T07A9.12	9.218	16.512	|			|	1.02955	0.00408	0.016
WBGene00021906	Y55B1AR.2	8.568	15.53	|			|	1.02713	0.000117	0.000795
WBGene00006496	cgef-1	7.129	12.802	|		CDC-42 Guanine nucleotide Exchange Factor [Source:UniProtKB/TrEMBL;Acc:O02134]	|	1.02597	2.27e-06	2.47e-05
WBGene00011723	T12A7.2	15.231	27.667	|			|	1.02418	5.74e-07	7.25e-06
WBGene00001935	his-61	23.61	43.072	|		Histone H2A [Source:UniProtKB/Swiss-Prot;Acc:P09588]	|	1.02337	0.00318	0.0131
WBGene00004268	rab-5	20.91	38.096	|		RAB family [Source:UniProtKB/TrEMBL;Acc:P91857]	|	1.02292	7.83e-06	7.46e-05
WBGene00001664	gpa-2	34.872	63.42	|	GPCR signalling;GPCR signalling: Gα	Guanine nucleotide-binding protein alpha-2 subunit [Source:UniProtKB/Swiss-Prot;Acc:P22454]	|	1.02251	3.05e-08	5.22e-07
WBGene00005344	srh-127	50.963	92.079	|	Chemoreceptor;Chemoreceptor: Srh class	Serpentine Receptor, class H [Source:UniProtKB/TrEMBL;Acc:O45171]	|	1.02178	5.43e-11	1.44e-09
WBGene00044113	C54F6.15	40.254	72.087	|			|	1.02154	0.00106	0.00525
WBGene00012130	T28F3.4	54.048	97.219	|	SLC transporter;SLC transporter: SLC17: Vesicular glutamate transporter family	SLC (SoLute Carrier) homolog [Source:UniProtKB/TrEMBL;Acc:Q8I4F5]	|	1.02151	1.12e-15	5.53e-14
WBGene00003660	nhr-70	17.849	32.424	|		Nuclear Hormone Receptor family [Source:UniProtKB/TrEMBL;Acc:G5EEL3]	|	1.02124	3.91e-05	0.000308
WBGene00019465	acl-14	70.235	127.1	|		ACyLtransferase-like [Source:UniProtKB/TrEMBL;Acc:O01882]	|	1.02021	3.87e-08	6.49e-07
WBGene00000273	brp-1	11.041	19.717	|		Bypass of Response to Pheromone in yeast [Source:UniProtKB/TrEMBL;Acc:Q9U1S2]	|	1.01969	0.00405	0.0159
WBGene00016570	gnrr-4	14.986	27.031	|	Neuropeptide receptors;Neuropeptide receptors: Gonadotropin-releasing hormone receptor family	GoNadotropin-Releasing hormone Receptor (GnRHR) related [Source:UniProtKB/TrEMBL;Acc:H2KZ99]	|	1.01572	5.47e-07	6.96e-06
WBGene00022028	Y65B4A.4	12.531	22.205	|			|	1.01452	0.00682	0.0246
WBGene00007604	xbx-9	3945.1	7065.43	|		X-BoX promoter element regulated [Source:UniProtKB/TrEMBL;Acc:Q18017]	|	1.01393	4.18e-17	2.33e-15
WBGene00022396	Y97E10AR.1	7.602	13.669	|			|	1.01221	1.69e-07	2.44e-06
WBGene00022786	ZK652.8	10.827	19.576	|			|	1.01192	8.92e-05	0.000631
WBGene00009499	ent-6	47.699	85.929	|	SLC transporter;SLC transporter: SLC29: Facilitative nucleoside transporters (includes low affinity, high capacity monoamine transporters) (REUPTAKE)	Equilibrative Nucleoside Transporter [Source:UniProtKB/TrEMBL;Acc:F5GUE6]	|	1.00955	3.41e-05	0.000273
WBGene00010006	F53H2.3	37.123	67.56	|			|	1.00814	0.000978	0.00491
WBGene00007059	vps-52	7.815	14.017	|		Vacuolar protein sorting-associated protein 52 homolog [Source:UniProtKB/Swiss-Prot;Acc:G5EFV8]	|	1.00784	1.86e-13	6.91e-12
WBGene00015791	C15C7.5	15.429	27.609	|			|	1.0076	0.000158	0.00103
WBGene00000597	col-8	47.79	86.903	|		Cuticle collagen 8 [Source:UniProtKB/Swiss-Prot;Acc:P18833]	|	1.00759	0.00651	0.0236
WBGene00001607	gln-6	21.869	39.47	|		GLutamiNe synthetase (Glutamate-ammonia ligase) [Source:UniProtKB/TrEMBL;Acc:O02225]	|	1.00563	2.14e-05	0.000181
WBGene00006579	tlk-1	30.011	53.573	|		Serine/threonine-protein kinase tousled-like 1 [Source:UniProtKB/Swiss-Prot;Acc:P34314]	|	1.00555	4.7e-19	3.23e-17
WBGene00015350	fbxl-1	23.513	42.037	|		Uncharacterized F-box/LRR-repeat protein C02F5.7 [Source:UniProtKB/Swiss-Prot;Acc:P34284]	|	1.00504	6.45e-12	1.99e-10
WBGene00016984	npr-8	33.532	59.894	|	Neuropeptide receptors;Neuropeptide receptors: Neuropeptide F/Y receptor family	Probable G-protein coupled receptor npr-8 [Source:UniProtKB/Swiss-Prot;Acc:Q18904]	|	1.00496	2.84e-23	2.84e-21
WBGene00003661	nhr-71	21.266	38.255	|		Nuclear hormone receptor family member nhr-71 [Source:UniProtKB/Swiss-Prot;Acc:Q9GTD4]	|	1.00434	2.42e-07	3.34e-06
WBGene00008748	yap-1	7.936	14.141	|		Yes-associated protein homolog 1 [Source:UniProtKB/Swiss-Prot;Acc:Q19404]	|	1.00287	1.82e-06	2.03e-05
WBGene00003829	nud-1	34.893	62.421	|		Aspergillus NUclear Division related; NUD-1 [Source:UniProtKB/TrEMBL;Acc:G5EE74]	|	1.00272	1.97e-07	2.78e-06
WBGene00003916	par-1	40.497	72.147	|		Serine/threonine-protein kinase par-1 [Source:UniProtKB/Swiss-Prot;Acc:Q9TW45]	|	1.00186	7.04e-09	1.34e-07
WBGene00007520	C11E4.6	34.533	61.453	|			|	1.00095	3.77e-18	2.29e-16
WBGene00018541	nhr-186	23.219	41.822	|		Nuclear Hormone Receptor family [Source:UniProtKB/TrEMBL;Acc:O01561]	|	1.00075	0.00018	0.00115
WBGene00021116	ncs-6	20.093	35.59	|	Auxiliary subunit for:: Voltage-gated K channels;Calcium binding protein;Calcium binding protein: NCS family	Neuronal Calcium Sensor family [Source:UniProtKB/TrEMBL;Acc:O16638]	|	0.999039	1.88e-08	3.33e-07
WBGene00007009	wwp-1	81.566	145.328	|		E3 ubiquitin-protein ligase [Source:UniProtKB/TrEMBL;Acc:V6CJJ8]	|	0.998655	4.79e-13	1.68e-11
WBGene00194910	ZC404.15	33.174	59.485	|			|	0.998518	0.000109	0.000751
WBGene00007173	B0393.8	24.913	44.721	|			|	0.997857	0.000339	0.00198
WBGene00015678	mcp-1	60.376	107.363	|		GDP-D-glucose phosphorylase 1 [Source:UniProtKB/Swiss-Prot;Acc:Q5ZR76]	|	0.997456	2.31e-11	6.49e-10
WBGene00009553	hinf-1	9.172	16.265	|		HIstone Nuclear Factor p (P) homolog [Source:UniProtKB/TrEMBL;Acc:O45494]	|	0.996894	3.58e-05	0.000285
WBGene00004804	skn-1	51.597	91.928	|			|	0.996244	2.3e-13	8.37e-12
WBGene00019877	R05D3.2	9.999	17.647	|		LIMR family protein R05D3.2 [Source:UniProtKB/Swiss-Prot;Acc:P34535]	|	0.996184	2.53e-07	3.47e-06
WBGene00009729	F45E10.2	35.012	62.108	|			|	0.995964	9.14e-09	1.71e-07
WBGene00022247	lgc-10	25.519	45.179	|	nAChR type ligand gated ion channel. Cys-loop LGIC superfamily	Ligand-Gated ion Channel [Source:UniProtKB/TrEMBL;Acc:V6CJ96]	|	0.994744	1.07e-12	3.57e-11
WBGene00012329	sre-44	35.638	63.446	|	Chemoreceptor;Chemoreceptor: Sre class	Serpentine Receptor, class E (Epsilon) [Source:UniProtKB/TrEMBL;Acc:Q9XUK3]	|	0.99412	6.51e-07	8.14e-06
WBGene00012409	Y7A5A.3	8.505	14.998	|			|	0.991092	0.000989	0.00496
WBGene00016867	C52B9.4	8.566	15.087	|			|	0.990491	2.12e-05	0.00018
WBGene00017010	D1007.15	11.183	19.7	|			|	0.989468	1.46e-10	3.63e-09
WBGene00003030	lin-45	43.068	76.334	|		Raf homolog serine/threonine-protein kinase [Source:UniProtKB/Swiss-Prot;Acc:Q07292]	|	0.987	9.18e-11	2.36e-09
WBGene00001208	egl-44	139.112	246.542	|		Transcription enhancer factor-like protein egl-44 [Source:UniProtKB/Swiss-Prot;Acc:Q19849]	|	0.984241	2.26e-05	0.000191
WBGene00009290	F31D4.2	6.741	11.939	|			|	0.98363	1.5e-07	2.18e-06
WBGene00001954	hlh-10	133.839	234.949	|		Helix Loop Helix [Source:UniProtKB/TrEMBL;Acc:Q23579]	|	0.98339	1.15e-18	7.48e-17
WBGene00022806	ZK697.3	24.789	43.974	|			|	0.983093	7.77e-07	9.55e-06
WBGene00022788	ZK682.2	30.5	53.406	|	SLC transporter;SLC transporter: SLC17: Vesicular glutamate transporter family	SLC (SoLute Carrier) homolog [Source:UniProtKB/TrEMBL;Acc:Q23576]	|	0.982939	1.1e-14	4.72e-13
WBGene00006769	unc-33	245.116	431.395	|			|	0.980644	1.92e-19	1.38e-17
WBGene00004147	larp-5	100.153	175.145	|		LARP (RNA binding La related protein) homolog [Source:UniProtKB/TrEMBL;Acc:H2KZU0]	|	0.980369	3.11e-22	2.81e-20
WBGene00004933	sod-4	9.475	16.839	|		Extracellular superoxide dismutase [Cu-Zn] [Source:UniProtKB/Swiss-Prot;Acc:P34461]	|	0.979688	0.0004	0.00229
WBGene00023475	srz-69	88.337	156.509	|	Chemoreceptor;Chemoreceptor: Srz class	Serpentine Receptor, class Z [Source:UniProtKB/TrEMBL;Acc:U3UB87]	|	0.978999	0.000308	0.00182
WBGene00004285	rab-37	58.161	101.814	|		RAB family [Source:UniProtKB/TrEMBL;Acc:A0A0K3ASU7]	|	0.978305	2.32e-07	3.23e-06
WBGene00005667	sru-4	12.178	21.771	|	Chemoreceptor;Chemoreceptor: Sru class	Serpentine Receptor, class U [Source:UniProtKB/TrEMBL;Acc:Q18364]	|	0.977879	0.00314	0.013
WBGene00015427	C04E6.13	163.257	284.543	|			|	0.976686	1.2e-16	6.48e-15
WBGene00020510	T14G11.1	52.03	90.626	|			|	0.974063	4.83e-10	1.12e-08
WBGene00019185	H10E21.5	37.412	65.608	|			|	0.973959	2.58e-11	7.16e-10
WBGene00022401	Y97E10AR.6	22.736	39.88	|			|	0.973896	6.85e-05	0.000502
WBGene00006092	str-25	8.111	14.323	|		Seven TM Receptor [Source:UniProtKB/TrEMBL;Acc:O62240]	|	0.972813	0.00394	0.0156
WBGene00018290	vps-60	93.554	165.997	|		Related to yeast Vacuolar Protein Sorting factor [Source:UniProtKB/TrEMBL;Acc:O16458]	|	0.972542	0.00747	0.0265
WBGene00019967	cyp-33C8	360.593	630.234	|		CYtochrome P450 family [Source:UniProtKB/TrEMBL;Acc:O02641]	|	0.970458	5.12e-05	0.000388
WBGene00020279	glb-25	122.444	212.761	|	Gas receptors;Gas receptors: Globin	GLoBin related; Globin [Source:UniProtKB/TrEMBL;Acc:G5EGB6]	|	0.969897	2.34e-11	6.54e-10
WBGene00004213	ptp-1	19.906	34.701	|	PDZ domain protein;PDZ domain protein: MAGUK type	Tyrosine-protein phosphatase 1 [Source:UniProtKB/Swiss-Prot;Acc:P28191]	|	0.96963	5.39e-06	5.36e-05
WBGene00011227	nlp-67	67.23	117.651	|	Neuropeptide;Neuropeptide: Neuropeptide-like proteins	Neuropeptide-Like Protein [Source:UniProtKB/TrEMBL;Acc:O62346]	|	0.968693	4.39e-08	7.24e-07
WBGene00002239	ksr-1	34.158	59.856	|		Kinase suppressor of Ras A [Source:UniProtKB/Swiss-Prot;Acc:G5EFD2]	|	0.967425	4.17e-08	6.93e-07
WBGene00235291	C01G5.25	249.791	434.704	|			|	0.967144	2.28e-09	4.67e-08
WBGene00021970	srz-64	9.209	16.122	|	Chemoreceptor;Chemoreceptor: Srz class	Serpentine Receptor, class Z [Source:UniProtKB/TrEMBL;Acc:O76625]	|	0.967015	0.000141	0.000939
WBGene00001757	gst-9	25.79	44.632	|		Probable glutathione S-transferase 9 [Source:UniProtKB/Swiss-Prot;Acc:Q21743]	|	0.966116	0.000591	0.00323
WBGene00017866	stn-2	45.948	79.876	|	PDZ domain protein	SynTrophiN [Source:UniProtKB/TrEMBL;Acc:Q5WRR6]	|	0.965737	2.57e-07	3.52e-06
WBGene00021503	ctsa-2	24.653	43.467	|		Carboxypeptidase [Source:UniProtKB/TrEMBL;Acc:O76725]	|	0.964985	0.000264	0.0016
WBGene00021764	Y51F10.3	18.816	32.41	|			|	0.962115	3.83e-06	3.93e-05
WBGene00004201	prx-19	14.217	24.749	|		Putative peroxisomal biogenesis factor 19 [Source:UniProtKB/Swiss-Prot;Acc:P34453]	|	0.961519	3.93e-08	6.56e-07
WBGene00077658	M106.8	20.506	35.492	|			|	0.961119	2.94e-08	5.04e-07
WBGene00000223	atf-7	54.214	94.302	|		ATF (cAMP-dependent transcription factor) family [Source:UniProtKB/TrEMBL;Acc:Q17801]	|	0.960698	1.8e-09	3.77e-08
WBGene00044071	dhhc-14	32.812	57.156	|		Palmitoyltransferase [Source:UniProtKB/TrEMBL;Acc:Q7Z127]	|	0.958639	3.94e-06	4.03e-05
WBGene00000696	col-122	496.019	857.173	|		COLlagen [Source:UniProtKB/TrEMBL;Acc:Q22183]	|	0.958386	0.00107	0.0053
WBGene00008837	sre-38	6.651	11.619	|	Chemoreceptor;Chemoreceptor: Sre class	Serpentine receptor class epsilon-38 [Source:UniProtKB/Swiss-Prot;Acc:O17816]	|	0.958332	0.00123	0.00593
WBGene00022427	spl-3	6.79	11.69	|		Sphingosine Phosphate Lyase [Source:UniProtKB/TrEMBL;Acc:U4PBG7]	|	0.957787	2.15e-06	2.35e-05
WBGene00016400	C34D4.4	30.017	51.601	|		Uncharacterized Golgi apparatus membrane protein-like protein C34D4.4 [Source:UniProtKB/Swiss-Prot;Acc:Q18449]	|	0.957784	3.78e-06	3.9e-05
WBGene00006020	srx-129	67.82	117.49	|	Chemoreceptor;Chemoreceptor: Srx class	Serpentine Receptor, class X [Source:UniProtKB/TrEMBL;Acc:Q7JL79]	|	0.955982	4.8e-07	6.17e-06
WBGene00006968	yars-2	54.365	93.758	|		Tyrosine--tRNA ligase [Source:UniProtKB/TrEMBL;Acc:H2KZL6]	|	0.955856	1.77e-08	3.16e-07
WBGene00016627	C44B7.5	26.181	45.303	|			|	0.953836	0.00404	0.0159
WBGene00018698	vha-18	98.412	170.094	|		Probable V-type proton ATPase subunit H 1 [Source:UniProtKB/Swiss-Prot;Acc:Q20666]	|	0.953704	7.7e-05	0.000556
WBGene00020051	mfsd-6	58.47	101.097	|		Major Facilitator Superfamily Domain containing homolog [Source:UniProtKB/TrEMBL;Acc:Q95Y88]	|	0.952243	7.25e-13	2.47e-11
WBGene00007900	C33D9.6	10.222	17.846	|			|	0.950923	0.000705	0.00375
WBGene00003638	nhr-48	12.054	20.694	|		Nuclear hormone receptor family member nhr-48 [Source:UniProtKB/Swiss-Prot;Acc:Q94407]	|	0.948195	3.71e-07	4.93e-06
WBGene00077443	Y71A12B.19	21.6	37.368	|			|	0.947606	0.000349	0.00203
WBGene00016639	C44B12.6	107.819	184.03	|			|	0.94695	1.9e-10	4.61e-09
WBGene00001496	frm-10	142.411	244.575	|		FERM domain (Protein4.1-ezrin-radixin-moesin) family [Source:UniProtKB/TrEMBL;Acc:O02254]	|	0.946279	1.71e-07	2.46e-06
WBGene00008973	F20D1.1	248.436	426.453	|			|	0.945461	3.29e-13	1.16e-11
WBGene00001425	fis-2	32.293	55.448	|		Mitochondrial fission 1 protein [Source:UniProtKB/TrEMBL;Acc:Q6AHP8]	|	0.944055	1.56e-05	0.000138
WBGene00003239	mig-2	7.602	13.061	|		Rac-like GTPase [Source:UniProtKB/TrEMBL;Acc:G5EBV3]	|	0.943924	0.000216	0.00135
WBGene00000403	casy-1	971.265	1652.88	|	Cadherin	CAlSYntenin/Alcadein homolog; Calsyntenin [Source:UniProtKB/TrEMBL;Acc:G5ED46]	|	0.941335	1.42e-19	1.03e-17
WBGene00007944	C34F6.10	9.221	15.869	|			|	0.93914	7.01e-08	1.1e-06
WBGene00005472	srh-266	104.112	177.316	|	Chemoreceptor;Chemoreceptor: Srh class	Serpentine Receptor, class H [Source:UniProtKB/TrEMBL;Acc:O17130]	|	0.939073	2.31e-08	4.02e-07
WBGene00044367	T05A8.8	56.181	95.956	|			|	0.93873	3.06e-09	6.2e-08
WBGene00001670	gpa-8	7.702	13.328	|	GPCR signalling;GPCR signalling: Gα	Guanine nucleotide-binding protein alpha-8 subunit [Source:UniProtKB/Swiss-Prot;Acc:Q20907]	|	0.938277	0.000977	0.00491
WBGene00001919	his-45	71.656	122.29	|		Histone H3 [Source:UniProtKB/Swiss-Prot;Acc:P08898]	|	0.934903	0.00221	0.00973
WBGene00003086	lst-4	13.921	23.579	|		Sorting nexin lst-4 [Source:UniProtKB/Swiss-Prot;Acc:Q8I4E2]	|	0.934108	0.000963	0.00485
WBGene00018847	marc-6	27.116	46.09	|		MARCH (Membrane-Associated Ring finger (C3HC4)) homolog [Source:UniProtKB/TrEMBL;Acc:Q400N4]	|	0.932535	1.77e-20	1.39e-18
WBGene00017663	F21D12.3	26.89	45.77	|			|	0.931495	0.000219	0.00136
WBGene00005579	sri-67	17.193	29.458	|	Chemoreceptor;Chemoreceptor: Sri class	Serpentine Receptor, class I [Source:UniProtKB/TrEMBL;Acc:C6S3M3]	|	0.931013	0.000738	0.00389
WBGene00001489	frm-2	32.555	55.432	|		FERM domain (Protein4.1-ezrin-radixin-moesin) family [Source:UniProtKB/TrEMBL;Acc:Q9GP93]	|	0.929737	1.29e-09	2.81e-08
WBGene00010990	tceb-3	35.603	60.435	|		Transcription elongation factor B polypeptide 3 [Source:UniProtKB/Swiss-Prot;Acc:Q09413]	|	0.928978	1.65e-10	4.06e-09
WBGene00001894	his-20	23.873	40.541	|		Histone H2B 2 [Source:UniProtKB/Swiss-Prot;Acc:Q27894]	|	0.928696	0.0142	0.0448
WBGene00011570	sre-28	55.058	93.681	|	Chemoreceptor;Chemoreceptor: Sre class	Serpentine Receptor, class E (Epsilon) [Source:UniProtKB/TrEMBL;Acc:Q22284]	|	0.928611	2.57e-07	3.51e-06
WBGene00012928	aakb-2	14.59	24.71	|		AMP-Activated Kinase Beta subunit [Source:UniProtKB/TrEMBL;Acc:Q9NAH7]	|	0.928385	2.1e-07	2.95e-06
WBGene00018872	F55C12.5	67.035	113.235	|			|	0.928196	3.07e-14	1.24e-12
WBGene00010043	F54C9.7	22.05	37.276	|			|	0.92602	1.71e-10	4.18e-09
WBGene00021123	W09G12.9	10.335	17.226	|			|	0.925963	0.00268	0.0114
WBGene00005393	srh-178	187.804	320.345	|	Chemoreceptor;Chemoreceptor: Srh class	Serpentine Receptor, class H [Source:UniProtKB/TrEMBL;Acc:G5EBQ4]	|	0.925467	0.000155	0.00102
WBGene00004357	rho-1	67.252	113.625	|		Ras-like GTP-binding protein rhoA [Source:UniProtKB/Swiss-Prot;Acc:Q22038]	|	0.925041	2.67e-09	5.44e-08
WBGene00045038	ule-2	18.723	31.713	|		Uterine Lumin Expressed/locailized [Source:UniProtKB/TrEMBL;Acc:Q067X2]	|	0.924334	0.000363	0.0021
WBGene00005584	sri-72	126.925	215.315	|	Chemoreceptor;Chemoreceptor: Sri class	Serpentine Receptor, class I [Source:UniProtKB/TrEMBL;Acc:A0A0B7H3M6]	|	0.924207	1.19e-05	0.000108
WBGene00001005	dlc-1	80.329	136.296	|	Dynein motors;Dynein motors: Light chain (LC8-type)	Dynein light chain 1, cytoplasmic [Source:UniProtKB/Swiss-Prot;Acc:Q22799]	|	0.923399	1.47e-06	1.68e-05
WBGene00001502	ftt-2	490.396	828.694	|		14-3-3-like protein 2 [Source:UniProtKB/Swiss-Prot;Acc:Q20655]	|	0.923055	7.61e-10	1.69e-08
WBGene00009881	F49C12.12	58.18	98.414	|			|	0.922612	2.09e-05	0.000178
WBGene00017088	akir-1	11.727	19.834	|		AKIRin (Conserved nuclear protein family) homolog [Source:UniProtKB/TrEMBL;Acc:Q966L3]	|	0.922125	4.92e-05	0.000376
WBGene00004274	rab-11.1	96.474	162.715	|		Ras-related protein rab-11.1 [Source:UniProtKB/Swiss-Prot;Acc:O01803]	|	0.921268	1.99e-07	2.8e-06
WBGene00016260	rege-1	79.757	134.92	|		Endoribonuclease rege-1 [Source:UniProtKB/Swiss-Prot;Acc:Q95YE2]	|	0.921238	2.95e-07	3.98e-06
WBGene00002335	let-60	10.697	18.139	|		Ras protein let-60 [Source:UniProtKB/Swiss-Prot;Acc:P22981]	|	0.920996	1.21e-05	0.00011
WBGene00010187	F57B1.1	112.422	189.903	|			|	0.919223	3.56e-09	7.14e-08
WBGene00014004	fic-1	17.239	28.982	|		Protein adenylyltransferase fic-1 [Source:UniProtKB/Swiss-Prot;Acc:Q23544]	|	0.919134	1.31e-09	2.83e-08
WBGene00013456	Y67A10A.7	12.97	21.737	|			|	0.91766	5.4e-06	5.37e-05
WBGene00018316	F41H10.3	21.967	36.849	|			|	0.915539	4.26e-11	1.15e-09
WBGene00012796	Y43F4A.1	7.377	12.358	|		Leishmanolysin-like peptidase [Source:UniProtKB/Swiss-Prot;Acc:O62446]	|	0.914985	1.19e-11	3.54e-10
WBGene00000896	dad-1	48.12	80.549	|		Dolichyl-diphosphooligosaccharide--protein glycosyltransferase subunit dad-1 [Source:UniProtKB/Swiss-Prot;Acc:P52872]	|	0.914959	4.09e-08	6.81e-07
WBGene00004719	sad-1	32.801	55.235	|		Serine/threonine kinase SAD-1 [Source:UniProtKB/Swiss-Prot;Acc:Q19469]	|	0.914486	9.31e-11	2.39e-09
WBGene00016316	C32D5.8	117.445	196.71	|			|	0.913719	4.27e-07	5.58e-06
WBGene00044417	C08F1.11	12.729	21.303	|			|	0.913417	0.000107	0.000739
WBGene00018474	cnep-1	18.661	31.117	|		CTD nuclear envelope phosphatase 1 homolog [Source:UniProtKB/Swiss-Prot;Acc:Q20432]	|	0.912404	4.5e-06	4.54e-05
WBGene00008166	saps-1	12.078	20.281	|		SAPS (Phosphatase associated) domain protein [Source:UniProtKB/TrEMBL;Acc:B2D6K9]	|	0.912255	4.33e-12	1.36e-10
WBGene00044009	ZK822.6	1956.72	3254.69	|			|	0.912012	1.56e-10	3.83e-09
WBGene00015249	otub-4	11.355	19.109	|		OTUBain deubiquitylating protease homolog [Source:UniProtKB/TrEMBL;Acc:U4PEY4]	|	0.911553	5.92e-08	9.51e-07
WBGene00009750	F46A8.7	60.146	99.809	|			|	0.908919	0.0141	0.0444
WBGene00005468	srh-262	52.434	88.436	|			|	0.908832	2.43e-05	0.000203
WBGene00020854	T27C4.1	115.758	192.721	|			|	0.908354	9.91e-12	2.97e-10
WBGene00302980	F53E2.2	117.049	196.405	|		Actin-depolymerizing factor 1, isoforms a/b [Source:UniProtKB/Swiss-Prot;Acc:Q07750]	|	0.907723	1.82e-07	2.61e-06
WBGene00008971	F20C5.6	10.915	18.078	|			|	0.907643	3.4e-05	0.000272
WBGene00001089	dre-1	25.339	42.453	|		F-box protein dre-1 [Source:UniProtKB/Swiss-Prot;Acc:Q94251]	|	0.907633	2.91e-14	1.18e-12
WBGene00006608	tre-2	53.696	89.889	|		Trehalase [Source:UniProtKB/TrEMBL;Acc:V6CKD9]	|	0.907145	7.74e-09	1.47e-07
WBGene00016097	C25E10.8	58.204	96.968	|			|	0.906933	0.000862	0.00442
WBGene00007635	npr-4	15.549	26.011	|	Neuropeptide receptors;Neuropeptide receptors: Neuropeptide F/Y receptor family	NeuroPeptide Receptor family [Source:UniProtKB/TrEMBL;Acc:A0A078BTK0]	|	0.9054	0.000108	0.000742
WBGene00000199	arx-1	16.751	27.854	|		Actin-related protein 3 [Source:UniProtKB/Swiss-Prot;Acc:Q9N4I0]	|	0.905292	2.64e-05	0.000218
WBGene00005251	srh-28	7.579	12.722	|	Chemoreceptor;Chemoreceptor: Srh class	Serpentine Receptor, class H [Source:UniProtKB/TrEMBL;Acc:Q23284]	|	0.904886	0.00148	0.00693
WBGene00014772	F56D5.4	33.828	56.507	|			|	0.903946	1.85e-09	3.85e-08
WBGene00044701	AH9.6	155.194	257.351	|			|	0.903296	3.69e-12	1.17e-10
WBGene00005647	srp-6	218.495	361.583	|		SeRPin; Serine or cysteine protease inhibitor [Source:UniProtKB/TrEMBL;Acc:G5EFH4]	|	0.902765	1.56e-09	3.31e-08
WBGene00005920	srx-29	60.784	102.611	|	Chemoreceptor;Chemoreceptor: Srx class	Serpentine Receptor, class X [Source:UniProtKB/TrEMBL;Acc:O45662]	|	0.901029	0.004	0.0158
WBGene00015217	tes-1	10.532	17.534	|		TEStin (Human testis-derived transcript) homolog [Source:UniProtKB/TrEMBL;Acc:Q17525]	|	0.901021	4.09e-09	8.11e-08
WBGene00012440	nlp-53	173.895	286.713	|	Neuropeptide;Neuropeptide: Neuropeptide-like proteins	Neuropeptide-Like Protein [Source:UniProtKB/TrEMBL;Acc:Q9XXJ3]	|	0.900936	5.49e-05	0.000414
WBGene00001915	his-41	1468.09	2426.05	|		Probable histone H2B 3 [Source:UniProtKB/Swiss-Prot;Acc:Q27484]	|	0.900816	1.4e-06	1.61e-05
WBGene00005333	srh-114	92.851	155.6	|			|	0.900478	6.86e-05	0.000503
WBGene00003592	nfi-1	11.992	19.822	|		NFI (Nuclear Factor I) family [Source:UniProtKB/TrEMBL;Acc:Q5H9N3]	|	0.900326	2.44e-05	0.000203
WBGene00014294	C53C7.5	29.164	48.571	|			|	0.900017	1.22e-08	2.23e-07
WBGene00010731	K10C3.4	42.175	70.234	|			|	0.899597	1.66e-09	3.51e-08
WBGene00009736	F45G2.10	44.964	74.148	|		MIP18 family protein F45G2.10 [Source:UniProtKB/Swiss-Prot;Acc:O62252]	|	0.899181	2.63e-05	0.000218
WBGene00014036	ZK643.5	10.653	17.695	|			|	0.89769	0.000601	0.00326
WBGene00007296	arrd-25	12.396	20.716	|	GPCR signalling;GPCR signalling: Arrestins	ARRestin Domain protein [Source:UniProtKB/TrEMBL;Acc:Q17624]	|	0.896054	0.00112	0.00547
WBGene00003953	pbs-7	117.06	193.665	|		Proteasome subunit beta [Source:UniProtKB/TrEMBL;Acc:P90868]	|	0.895883	9.02e-18	5.39e-16
WBGene00001562	lin-66	21.455	35.602	|			|	0.89579	2.23e-18	1.38e-16
WBGene00011935	scrm-1	172.104	285.745	|		Phospholipid scramblase [Source:UniProtKB/TrEMBL;Acc:Q7JKP1]	|	0.895593	3.77e-13	1.33e-11
WBGene00009498	tat-5	25.416	42.19	|		Phospholipid-transporting ATPase [Source:UniProtKB/TrEMBL;Acc:G5EE81]	|	0.895354	1.24e-09	2.69e-08
WBGene00077783	D1054.18	22.726	37.347	|			|	0.893869	0.011	0.0365
WBGene00011680	T10B10.3	10.834	17.972	|			|	0.892658	4.48e-10	1.04e-08
WBGene00014779	F59A1.2	32.079	53.53	|			|	0.892409	0.000284	0.0017
WBGene00003104	mab-7	10.264	16.779	|		Protein male abnormal 7 [Source:UniProtKB/Swiss-Prot;Acc:Q95Q39]	|	0.892163	0.00387	0.0154
WBGene00002048	ida-1	243.724	400.181	|	Synaptic release machinery;Synaptic release machinery: IA2	Receptor-type tyrosine-protein phosphatase-like ida-1 [Source:UniProtKB/Swiss-Prot;Acc:G5EGJ5]	|	0.890467	1.82e-17	1.05e-15
WBGene00302968	Y62E10A.24	80.432	133.084	|		Ribonuclease P protein subunit p20 [Source:UniProtKB/TrEMBL;Acc:Q9U1X8]	|	0.890275	1.24e-07	1.84e-06
WBGene00018953	F56C9.10	19.059	31.585	|			|	0.889513	1.88e-06	2.09e-05
WBGene00006943	wrm-1	6.934	11.422	|		Armadillo repeat-containing protein wrm-1 [Source:UniProtKB/Swiss-Prot;Acc:Q10953]	|	0.888376	1.18e-06	1.39e-05
WBGene00022052	Y67D2.2	11.592	18.901	|		Ubiquitin carboxyl-terminal hydrolase [Source:UniProtKB/TrEMBL;Acc:Q9BKQ6]	|	0.887435	4.73e-05	0.000363
WBGene00019390	irld-43	49.53	81.603	|			|	0.887412	9.18e-11	2.36e-09
WBGene00008000	C38C10.2	24.771	40.636	|	SLC transporter;SLC transporter: SLC17: Vesicular glutamate transporter family	Uncharacterized transporter slc-17.2 [Source:UniProtKB/Swiss-Prot;Acc:Q03567]	|	0.887385	2.37e-11	6.62e-10
WBGene00018152	acs-4	54.673	90.144	|		Fatty Acid CoA Synthetase family [Source:UniProtKB/TrEMBL;Acc:Q20121]	|	0.887237	1.31e-11	3.85e-10
WBGene00013273	marc-5	49.589	81.779	|		MARCH (Membrane-Associated Ring finger (C3HC4)) homolog [Source:UniProtKB/TrEMBL;Acc:Q9XWI0]	|	0.88683	9.43e-08	1.44e-06
WBGene00044311	K04C2.7	18.404	30.526	|			|	0.886444	0.0118	0.0386
WBGene00189948	F56H9.8	83.125	137.934	|			|	0.886166	0.000863	0.00443
WBGene00005019	sqv-1	9.747	16.004	|		SQuashed Vulva [Source:UniProtKB/TrEMBL;Acc:X5M5R6]	|	0.886126	3.15e-05	0.000255
WBGene00017288	F09E5.10	35.155	58.266	|			|	0.886086	4.15e-07	5.45e-06
WBGene00018164	sup-36	52.004	85.975	|		SUPpressor [Source:UniProtKB/TrEMBL;Acc:Q94207]	|	0.885524	0.000155	0.00102
WBGene00000485	che-3	96.892	160.724	|	Dynein motors;Dynein motors: Heavy chain;Sensory cilia transport;Sensory cilia transport: IFT-Dynein	Cytoplasmic dynein 2 heavy chain 1 [Source:UniProtKB/Swiss-Prot;Acc:Q19542]	|	0.885074	8.74e-08	1.35e-06
WBGene00021854	Y54F10AR.1	66.057	108.646	|			|	0.885036	1.88e-07	2.69e-06
WBGene00012444	Y15E3A.5	22.243	36.892	|			|	0.884301	3.52e-05	0.000281
WBGene00007855	C31H5.4	35.482	58.754	|			|	0.884222	0.000906	0.00461
WBGene00013281	sre-27	20.3	33.273	|	Chemoreceptor;Chemoreceptor: Sre class	Serpentine receptor class epsilon-27 [Source:UniProtKB/Swiss-Prot;Acc:O62488]	|	0.88212	2.07e-05	0.000177
WBGene00000897	daf-1	12.067	19.764	|		Cell surface receptor daf-1 [Source:UniProtKB/Swiss-Prot;Acc:P20792]	|	0.881158	2.22e-08	3.9e-07
WBGene00017053	D2024.5	27.112	44.394	|			|	0.878899	4.92e-07	6.3e-06
WBGene00004888	smo-1	217.719	355.032	|		Small ubiquitin-related modifier [Source:UniProtKB/Swiss-Prot;Acc:P55853]	|	0.878477	5.77e-07	7.29e-06
WBGene00014058	ZK673.2	36.562	59.814	|		Probable adenylate kinase isoenzyme ZK673.2 [Source:UniProtKB/Swiss-Prot;Acc:Q09629]	|	0.878107	3.34e-12	1.07e-10
WBGene00006711	ubc-16	24.547	40.196	|		UBiquitin Conjugating enzyme [Source:UniProtKB/TrEMBL;Acc:Q9XWF6]	|	0.875624	9.05e-06	8.51e-05
WBGene00007226	C01G6.4	43.498	71.362	|			|	0.875207	4.74e-09	9.27e-08
WBGene00016368	nhr-163	7.144	11.768	|		Nuclear Hormone Receptor family [Source:UniProtKB/TrEMBL;Acc:Q18392]	|	0.874505	0.00163	0.00755
WBGene00015451	C04F5.9	6.774	11.011	|			|	0.874145	1.98e-06	2.19e-05
WBGene00001091	drh-2	23.624	38.994	|			|	0.873802	4.39e-05	0.000341
WBGene00005025	sqv-7	12.689	20.831	|		UDP-sugar transporter sqv-7 [Source:UniProtKB/Swiss-Prot;Acc:Q18779]	|	0.873657	2.25e-09	4.64e-08
WBGene00008948	F19B6.1	31.504	51.794	|		Uridine kinase [Source:UniProtKB/TrEMBL;Acc:D3YT38]	|	0.873534	4.73e-07	6.11e-06
WBGene00019163	ubxn-6	42.931	69.938	|		UBX domain-containing protein 6 [Source:UniProtKB/Swiss-Prot;Acc:Q8WTJ4]	|	0.873079	2.35e-07	3.25e-06
WBGene00001160	efk-1	12.308	20.116	|		Eukaryotic elongation factor 2 kinase [Source:UniProtKB/Swiss-Prot;Acc:O01991]	|	0.872608	1.12e-08	2.06e-07
WBGene00021827	dnc-6	11.351	18.436	|		Dynactin subunit 6 [Source:UniProtKB/Swiss-Prot;Acc:Q9N3F1]	|	0.871822	0.000102	0.000706
WBGene00017861	F27D9.2	10.341	16.809	|			|	0.869779	4.85e-05	0.000371
WBGene00044079	tag-241	9.293	15.285	|			|	0.869483	0.000231	0.00143
WBGene00003889	osm-9	50.646	82.288	|	TRP channel;TRP channel: TRPV	Olfactory channel [Source:UniProtKB/TrEMBL;Acc:G5EBV8]	|	0.869122	1.36e-11	3.96e-10
WBGene00022423	nhr-41	32.306	52.748	|		Nuclear Hormone Receptor family [Source:UniProtKB/TrEMBL;Acc:U4PRT9]	|	0.868627	1.95e-06	2.16e-05
WBGene00000901	daf-5	131.391	214.711	|		Abnormal DAuer Formation DAF-5, a Ski oncogene homolog involved in a neuronal TGF beta pathway (71.0 kD) (Daf-5) [Source:UniProtKB/TrEMBL;Acc:G5EDM7]	|	0.868083	1.52e-07	2.21e-06
WBGene00001660	gop-1	6.22	10.091	|			|	0.866819	1.72e-07	2.48e-06
WBGene00010300	F59A1.15	15.773	25.906	|			|	0.866797	0.00105	0.00519
WBGene00022804	ZK697.1	90.656	147.035	|			|	0.865163	6.78e-05	0.000497
WBGene00004345	rgs-2	536.082	865.247	|	GPCR signalling;GPCR signalling: RGS family	Regulator of G-protein signaling rgs-2 [Source:UniProtKB/Swiss-Prot;Acc:P49808]	|	0.865116	4.66e-12	1.45e-10
WBGene00006605	tra-2	15.528	25.029	|		Sex-determining transformer protein 2 [Source:UniProtKB/Swiss-Prot;Acc:P34709]	|	0.864459	1.47e-06	1.68e-05
WBGene00013899	ZC443.4	227.146	367.115	|			|	0.864447	1.09e-07	1.63e-06
WBGene00012674	bed-1	11.364	18.268	|		BED-type zinc finger putative transcription factor [Source:UniProtKB/TrEMBL;Acc:Q56VX2]	|	0.864389	1.72e-05	0.00015
WBGene00022412	Y102A11A.2	45.04	72.823	|			|	0.864139	1.58e-06	1.78e-05
WBGene00005648	srp-7	81.703	131.587	|		SeRPin; Serine or cysteine protease inhibitor [Source:UniProtKB/TrEMBL;Acc:Q6QUQ6]	|	0.863864	5.3e-08	8.58e-07
WBGene00005163	srg-5	79.206	128.695	|	Chemoreceptor;Chemoreceptor: Srg class	Serpentine receptor class gamma-5 [Source:UniProtKB/Swiss-Prot;Acc:P54127]	|	0.863019	1.67e-06	1.88e-05
WBGene00011874	T20G5.13	14.928	24.07	|			|	0.862982	0.000384	0.00221
WBGene00009594	cyld-1	16.512	26.834	|		CYLinDromatosis (Human disease gene) homolog [Source:UniProtKB/TrEMBL;Acc:H2L265]	|	0.862787	1.97e-05	0.000169
WBGene00017236	nlp-60	196.481	321.655	|	Neuropeptide;Neuropeptide: Neuropeptide-like proteins	Neuropeptide-Like Protein [Source:UniProtKB/TrEMBL;Acc:Q19195]	|	0.862228	0.00777	0.0273
WBGene00008430	hgap-2	78.778	127.99	|		Heterodimeric GTPase Activating Protein subunit [Source:UniProtKB/TrEMBL;Acc:H9G2Q4]	|	0.862022	3.32e-06	3.47e-05
WBGene00019295	pfkb-1.2	7.688	12.361	|		6-phosphofructo-2-kinase/fructose-2,6-bisphosphatase 6-phosphofructo-2-kinase Fructose-2,6-bisphosphatase [Source:UniProtKB/Swiss-Prot;Acc:Q21122]	|	0.861749	0.0027	0.0115
WBGene00010875	M05D6.2	55.148	89.056	|			|	0.8614	1.18e-08	2.17e-07
WBGene00018604	uggt-1	27.537	44.345	|		UDP-Glucose Glycoprotein glucosylTransferase [Source:UniProtKB/TrEMBL;Acc:Q9GPA0]	|	0.860145	1.54e-15	7.41e-14
WBGene00005332	srh-113	108.613	176.483	|	Chemoreceptor;Chemoreceptor: Srh class	Serpentine Receptor, class H [Source:UniProtKB/TrEMBL;Acc:Q9XXQ1]	|	0.859526	0.00107	0.0053
WBGene00020572	rund-1	10.786	17.644	|		RUN Domain containing protein; RUND-1 [Source:UniProtKB/TrEMBL;Acc:Q22585]	|	0.858775	0.0026	0.0111
WBGene00006479	tmbi-4	47.623	76.549	|		Transmembrane BAX inhibitor motif-containing protein 4 [Source:UniProtKB/Swiss-Prot;Acc:Q11080]	|	0.85722	3.42e-06	3.56e-05
WBGene00005964	srx-73	240.994	393.13	|	Chemoreceptor;Chemoreceptor: Srx class	Serpentine Receptor, class X [Source:UniProtKB/TrEMBL;Acc:Q3Y401]	|	0.856293	0.00464	0.0178
WBGene00004926	snt-6	30.189	48.975	|	Synaptic release machinery;Synaptic release machinery: synaptotagmin	SyNapTotagmin [Source:UniProtKB/TrEMBL;Acc:A0A0S4XQZ9]	|	0.855726	3.59e-06	3.73e-05
WBGene00016384	cdgs-1	40.153	64.504	|		Phosphatidate cytidylyltransferase [Source:UniProtKB/Swiss-Prot;Acc:P53439]	|	0.855436	1.49e-06	1.7e-05
WBGene00007113	B0035.15	7.231	11.534	|			|	0.853705	0.00019	0.00121
WBGene00017241	pcyt-1	7.247	11.556	|		Putative choline-phosphate cytidylyltransferase [Source:UniProtKB/Swiss-Prot;Acc:P49583]	|	0.85313	6.7e-06	6.52e-05
WBGene00010770	K11D2.4	51.44	82.894	|			|	0.852201	4.76e-07	6.13e-06
WBGene00302995	H06H21.37	18.216	29.118	|			|	0.851409	0.000194	0.00123
WBGene00014145	ZK899.7	8.348	13.302	|			|	0.85045	0.00284	0.0119
WBGene00000001	aap-1	36.515	58.869	|		Phosphoinositide 3-kinase adapter subunit; Phosphoinositide kinase AdAPter subunit [Source:UniProtKB/TrEMBL;Acc:G5EDP9]	|	0.850176	1.9e-07	2.7e-06
WBGene00005150	sre-2	21.131	33.974	|	Chemoreceptor;Chemoreceptor: Sre class	Serpentine receptor class epsilon-2 [Source:UniProtKB/Swiss-Prot;Acc:Q09273]	|	0.850019	3.7e-06	3.83e-05
WBGene00004307	rap-1	9.259	14.861	|		Ras-related protein Rap-1 [Source:UniProtKB/Swiss-Prot;Acc:Q18246]	|	0.849382	0.000459	0.00259
WBGene00220257	C02H6.3	220.576	356.85	|			|	0.847681	0.00153	0.00714
WBGene00001885	his-11	24.107	38.553	|		Histone H2B 1 [Source:UniProtKB/Swiss-Prot;Acc:P04255]	|	0.846694	0.00398	0.0158
WBGene00003907	paf-2	13.687	21.675	|		Platelet-activating factor acetylhydrolase homolog 2 [Source:UniProtKB/Swiss-Prot;Acc:Q22943]	|	0.846668	0.000283	0.00169
WBGene00001787	gst-39	90.675	145.702	|		Glutathione S-Transferase [Source:UniProtKB/TrEMBL;Acc:Q9NAB0]	|	0.845977	2.47e-07	3.41e-06
WBGene00015285	gmeb-1	12.823	20.601	|		GMEB (Glucocorticoid Modulatory Element Binding protein) transcriptional regulator homolog [Source:UniProtKB/TrEMBL;Acc:O17208]	|	0.845334	0.000208	0.00131
WBGene00007058	dmd-6	248.976	398.981	|		DM (Doublesex/MAB-3) Domain family [Source:UniProtKB/TrEMBL;Acc:O62159]	|	0.844901	1.15e-07	1.72e-06
WBGene00008780	hxk-1	36.465	58.128	|		Phosphotransferase [Source:UniProtKB/TrEMBL;Acc:Q19440]	|	0.84429	9.71e-08	1.48e-06
WBGene00010923	rle-1	24.018	38.568	|		Regulation of longevity by E3 ubiquitin-protein ligase [Source:UniProtKB/Swiss-Prot;Acc:O45962]	|	0.842956	5.14e-08	8.35e-07
WBGene00010143	F56A12.2	38.045	60.794	|	Neuropeptide receptors;Neuropeptide receptors: Related family with no specific orthologs 4		|	0.842901	1.09e-06	1.29e-05
WBGene00014022	ZK637.2	10.754	17.033	|			|	0.842397	0.00964	0.0326
WBGene00044771	tmem-218	218.026	347.292	|		TMEM (Human TransMEMbrane protein) homolog [Source:UniProtKB/TrEMBL;Acc:Q2A955]	|	0.842063	8.11e-10	1.8e-08
WBGene00010290	F58H1.7	311.392	494.401	|		NMDA receptor auxiliary protein [Source:UniProtKB/TrEMBL;Acc:G5EEF9]	|	0.841992	3.45e-13	1.22e-11
WBGene00005965	srx-74	16.122	26.011	|	Chemoreceptor;Chemoreceptor: Srx class	Serpentine Receptor, class X [Source:UniProtKB/TrEMBL;Acc:Q20285]	|	0.841719	0.00415	0.0162
WBGene00043992	bbs-4	164.275	261.578	|	Sensory cilia transport;Sensory cilia transport: BBSome	Bardet-Biedl syndrome 4 protein homolog [Source:UniProtKB/Swiss-Prot;Acc:Q5CZ52]	|	0.840529	7.17e-07	8.87e-06
WBGene00013494	irld-58	22.086	35.196	|			|	0.839982	5.43e-06	5.4e-05
WBGene00001189	egl-21	2620.71	4143.66	|	Neuropeptide processing;Neuropeptide processing: Maturation	Carboxypeptidase E [Source:UniProtKB/Swiss-Prot;Acc:O17754]	|	0.839423	1.74e-08	3.11e-07
WBGene00004793	shw-3	42.276	66.733	|	Potassium Channel;Potassium Channel: Voltage-gated: Shaw/K 5	SHaW family of potassium channels [Source:UniProtKB/TrEMBL;Acc:A0A3B1DVP6]	|	0.839204	3.3e-08	5.61e-07
WBGene00002262	ldh-1	534.753	848.374	|		L-lactate dehydrogenase [Source:UniProtKB/Swiss-Prot;Acc:Q27888]	|	0.838282	5.11e-08	8.31e-07
WBGene00002344	let-70	99.916	158.669	|		Ubiquitin-conjugating enzyme E2 2 [Source:UniProtKB/Swiss-Prot;Acc:P35129]	|	0.835548	2.55e-07	3.5e-06
WBGene00013360	Y60A3A.9	24.529	38.909	|			|	0.83454	4.24e-09	8.4e-08
WBGene00003391	mog-3	20.806	33.044	|		Masculinisation Of Germline; Sex determining protein MOG-3 [Source:UniProtKB/TrEMBL;Acc:G5EBT5]	|	0.834208	7.82e-06	7.46e-05
WBGene00021549	cdap-2	11.467	18.174	|		CD2AP homolog [Source:UniProtKB/TrEMBL;Acc:Q6A573]	|	0.833699	0.000113	0.000771
WBGene00005585	sri-73	59.483	95.041	|	Chemoreceptor;Chemoreceptor: Sri class	Serpentine Receptor, class I [Source:UniProtKB/TrEMBL;Acc:O44676]	|	0.833596	0.000274	0.00164
WBGene00077536	F38B7.10	78.852	125.825	|			|	0.833032	0.000172	0.00111
WBGene00018150	epg-4	19.963	31.727	|		Ectopic P granules protein 4 [Source:UniProtKB/Swiss-Prot;Acc:Q20123]	|	0.832879	3.44e-05	0.000275
WBGene00002080	xpo-3	7.57	11.974	|		EXPOrtin (Nuclear export receptor) [Source:UniProtKB/TrEMBL;Acc:W6RQY2]	|	0.832005	5.81e-06	5.73e-05
WBGene00044006	nlp-82	26.403	41.938	|	Neuropeptide;Neuropeptide: Neuropeptide-like proteins	Neuropeptide-Like Protein [Source:UniProtKB/TrEMBL;Acc:G5EGM0]	|	0.831642	0.000114	0.000779
WBGene00001439	fkh-7	31.283	50.226	|		ForKHead transcription factor family [Source:UniProtKB/TrEMBL;Acc:V6CLW4]	|	0.830792	0.000497	0.00277
WBGene00010828	M02B1.3	41.752	66.528	|			|	0.830332	1.28e-05	0.000116
WBGene00011250	R11H6.2	156.523	247.165	|			|	0.829292	1.18e-07	1.75e-06
WBGene00013302	vti-1	19.334	30.624	|	Synaptic release machinery;Synaptic release machinery: Q-SNARE:Qb subtype	VTI (Vesicle Transport through t-SNARE Interaction) homolog [Source:UniProtKB/TrEMBL;Acc:O18230]	|	0.829197	2.13e-05	0.000181
WBGene00017282	algn-2	25.091	39.433	|		Asparagine Linked Glycosylation (ALG) homolog, Nematode [Source:UniProtKB/TrEMBL;Acc:Q19265]	|	0.828658	3.17e-06	3.33e-05
WBGene00016507	abhd-5.2	117.209	186.757	|		Abhydrolase domain-containing protein abhd-5.2 [Source:UniProtKB/Swiss-Prot;Acc:H2KZ86]	|	0.828323	0.000784	0.00409
WBGene00000368	ccb-1	33.504	52.633	|	Voltage-gated Calcium Channel	Calcium Channel, Beta subunit [Source:UniProtKB/TrEMBL;Acc:O01661]	|	0.827792	2.09e-05	0.000178
WBGene00019888	btbd-10	23.136	36.468	|		BTB/POZ Domain-containing protein homolog [Source:UniProtKB/TrEMBL;Acc:Q21747]	|	0.827061	1.25e-05	0.000113
WBGene00023491	tsp-21	40.542	64.352	|		Tetraspanin-21 [Source:UniProtKB/Swiss-Prot;Acc:Q5WRN1]	|	0.826651	2.06e-06	2.26e-05
WBGene00000834	cua-1	19.342	30.459	|		CU (Copper) ATPase [Source:UniProtKB/TrEMBL;Acc:G5ED40]	|	0.826057	1.8e-07	2.58e-06
WBGene00000190	arf-1.1	251.043	398.976	|		ADP-ribosylation factor 1-like 1 [Source:UniProtKB/Swiss-Prot;Acc:Q94231]	|	0.825693	0.000201	0.00127
WBGene00000547	clp-7	58.452	92.272	|		CaLPain family [Source:UniProtKB/TrEMBL;Acc:U4PMH7]	|	0.825152	3.12e-09	6.29e-08
WBGene00001170	egl-1	20.577	32.947	|		Programmed cell death activator egl-1 [Source:UniProtKB/Swiss-Prot;Acc:O61667]	|	0.825111	0.00139	0.00656
WBGene00003072	lrp-2	20.064	32.086	|		Low-density lipoprotein RecePtor related [Source:UniProtKB/TrEMBL;Acc:O01768]	|	0.824312	0.000877	0.00449
WBGene00007363	stdh-1	10.203	16.029	|		Putative steroid dehydrogenase 1 [Source:UniProtKB/Swiss-Prot;Acc:Q17703]	|	0.824049	2.32e-05	0.000195
WBGene00008649	F10D11.3	65.478	104.049	|			|	0.82311	0.00323	0.0133
WBGene00002146	ipp-5	6.393	10.016	|		Probable type I inositol 1,4,5-trisphosphate 5-phosphatase [Source:UniProtKB/Swiss-Prot;Acc:Q17848]	|	0.822799	0.00124	0.00598
WBGene00007247	C01G12.7	620.45	981.178	|			|	0.822386	5.26e-06	5.25e-05
WBGene00008880	F16B12.4	8.232	13.058	|			|	0.821959	0.0102	0.0341
WBGene00000680	col-106	54.034	85.551	|		COLlagen [Source:UniProtKB/TrEMBL;Acc:Q8MXT6]	|	0.821877	0.000652	0.0035
WBGene00018654	F49H12.3	20.462	32.394	|			|	0.821795	0.00155	0.00721
WBGene00021950	cutl-26	15.535	24.221	|		CUTiclin-Like [Source:UniProtKB/TrEMBL;Acc:Q95XW3]	|	0.820893	8.94e-05	0.000632
WBGene00021840	pign-1	10.716	16.719	|		PhosphatidylInositol Glycan anchor biosynthesis class N homolog [Source:UniProtKB/TrEMBL;Acc:G4SNP0]	|	0.820725	2.52e-07	3.46e-06
WBGene00005398	srh-183	18.746	29.365	|	Chemoreceptor;Chemoreceptor: Srh class	Serpentine Receptor, class H [Source:UniProtKB/TrEMBL;Acc:Q9U200]	|	0.820646	0.000393	0.00225
WBGene00012755	Y41C4A.8	6.653	10.389	|			|	0.820488	0.00979	0.033
WBGene00021685	herc-1	48.663	76.161	|		HECT and RCC domain E3 ubiquitin ligase [Source:UniProtKB/TrEMBL;Acc:W6RY72]	|	0.819945	5.09e-11	1.36e-09
WBGene00016747	nmur-1	26.67	41.786	|	Neuropeptide receptors;Neuropeptide receptors: Ghrelin-obstatin/neuromedin U receptor family	NMUR (NeuroMedin U Receptor) homolog; Neuromedin U receptor [Source:UniProtKB/TrEMBL;Acc:Q18701]	|	0.81969	4.1e-06	4.17e-05
WBGene00007703	gbf-1	72.871	114.969	|			|	0.819465	3.78e-10	8.86e-09
WBGene00002178	jnk-1	23.699	37.145	|		Stress-activated protein kinase jnk-1 [Source:UniProtKB/Swiss-Prot;Acc:Q8WQG9]	|	0.819108	1.16e-05	0.000106
WBGene00006715	ubc-20	11.407	17.867	|		UBiquitin Conjugating enzyme [Source:UniProtKB/TrEMBL;Acc:Q9TZ69]	|	0.819093	5.5e-05	0.000414
WBGene00002889	let-765	33.078	52.096	|		Notch signaling pathway homolog-1 [Source:UniProtKB/TrEMBL;Acc:O01737]	|	0.818535	1.41e-11	4.08e-10
WBGene00012788	Y43D4A.2	27.695	43.913	|			|	0.817752	0.016	0.0491
WBGene00007044	cpna-5	68.211	107.154	|		Copine family protein 5 [Source:UniProtKB/Swiss-Prot;Acc:Q09219]	|	0.816844	4.52e-15	2.06e-13
WBGene00015018	srz-85	59.21	93.594	|	Chemoreceptor;Chemoreceptor: Srz class	Serpentine Receptor, class Z [Source:UniProtKB/TrEMBL;Acc:Q5F4U1]	|	0.81621	0.000718	0.0038
WBGene00010810	M01F1.4	11.287	17.641	|			|	0.815861	0.000145	0.000962
WBGene00010220	sre-29	14.023	22.159	|	Chemoreceptor;Chemoreceptor: Sre class	Serpentine receptor class epsilon-29 [Source:UniProtKB/Swiss-Prot;Acc:O62269]	|	0.815781	0.000958	0.00483
WBGene00006720	ubc-25	16.598	26.209	|		Ubiquitin-conjugating enzyme E2 25 [Source:UniProtKB/Swiss-Prot;Acc:Q93571]	|	0.815514	1.84e-06	2.05e-05
WBGene00001262	emb-8	29.678	46.764	|		NADPH--cytochrome P450 reductase [Source:UniProtKB/TrEMBL;Acc:Q09590]	|	0.81522	7.11e-06	6.87e-05
WBGene00007176	kcnl-1	264.168	412.099	|	Potassium Channel;Potassium Channel: Calcium-activated SK family	KCNN (Potassium K ChaNNel, calcium activated)-Like [Source:UniProtKB/TrEMBL;Acc:Q8I4D2]	|	0.814445	4.61e-12	1.44e-10
WBGene00001175	egl-6	12.87	20.04	|	Neuropeptide receptors;Neuropeptide receptors: Drosophila Dromyosuppressin receptor family	G protein-coupled receptor EGL-6 isoform b [Source:UniProtKB/TrEMBL;Acc:G5EFX1]	|	0.814411	0.00722	0.0258
WBGene00020115	mboa-6	19.033	29.743	|		Lysophospholipid acyltransferase 5 [Source:UniProtKB/Swiss-Prot;Acc:O01925]	|	0.81383	1.74e-07	2.49e-06
WBGene00000396	cdh-4	38.592	61.113	|	Cadherin	Cadherin-4 [Source:UniProtKB/TrEMBL;Acc:A0A1C3NSI5]	|	0.813299	0.000549	0.00303
WBGene00019211	H18N23.2	6.587	10.307	|		Protein phosphatase 1 regulatory subunit [Source:UniProtKB/TrEMBL;Acc:Q400N3]	|	0.811469	0.00185	0.00836
WBGene00011590	bus-19	43.543	68.166	|			|	0.810063	4.08e-05	0.000319
WBGene00016871	inso-1	16.048	25.11	|		INSOmniac (Drosophila sleep affecting) homolog [Source:UniProtKB/TrEMBL;Acc:Q18776]	|	0.809632	7.96e-05	0.000572
WBGene00004902	snf-3	29.44	45.626	|	SLC transporter;SLC transporter: SLC6: Na+/Cl- dependent neurotransmitter transporter family (REUPTAKE)	Sodium- and chloride-dependent betaine transporter [Source:UniProtKB/Swiss-Prot;Acc:G5EBN9]	|	0.809328	2.19e-06	2.39e-05
WBGene00019166	tat-2	6.49	10.136	|		Phospholipid-transporting ATPase [Source:UniProtKB/TrEMBL;Acc:U4PBV8]	|	0.808397	5.66e-05	0.000425
WBGene00018777	F53H1.3	11.758	18.183	|			|	0.807258	4.84e-05	0.000371
WBGene00001475	fmi-1	60.059	94.894	|	Adhesion-type GPCR;Adhesion-type GPCR: Homolog:Flamingo/Starry Night/CELSR;Cadherin	FlaMIngo (Cadherin plus 7TM domain) homolog [Source:UniProtKB/TrEMBL;Acc:A0A0K3AUS4]	|	0.807257	0.000268	0.00162
WBGene00006704	ubc-7	38.645	60.389	|		Probable ubiquitin-conjugating enzyme E2 7 [Source:UniProtKB/Swiss-Prot;Acc:P34477]	|	0.806783	1.68e-05	0.000147
WBGene00003858	ogt-1	37.755	58.94	|		UDP-N-acetylglucosamine--peptide N-acetylglucosaminyltransferase [Source:UniProtKB/Swiss-Prot;Acc:O18158]	|	0.806606	4.51e-12	1.41e-10
WBGene00017244	apy-1	7.986	12.315	|		Apyrase apy-1 [Source:UniProtKB/Swiss-Prot;Acc:Q19202]	|	0.80636	5.2e-05	0.000394
WBGene00000175	aqp-7	184.284	285.105	|		AQuaPorin or aquaglyceroporin related [Source:UniProtKB/TrEMBL;Acc:Q21473]	|	0.806253	4.48e-07	5.83e-06
WBGene00009455	phip-1	24.5	37.877	|		Protein HIstidine Phosphatase [Source:UniProtKB/TrEMBL;Acc:P90861]	|	0.806073	0.00288	0.0121
WBGene00009580	xbx-6	659.424	1020.52	|		X-BoX promoter element regulated [Source:UniProtKB/TrEMBL;Acc:Q8MQ56]	|	0.80588	3.71e-07	4.93e-06
WBGene00008782	sdz-14	47.9	74.677	|		SKN-1 Dependent Zygotic transcript [Source:UniProtKB/TrEMBL;Acc:O62161]	|	0.805697	5.95e-08	9.55e-07
WBGene00013859	ZC247.1	162.252	256.753	|			|	0.804977	0.00222	0.00975
WBGene00004765	sel-8	8.409	13.073	|			|	0.803586	1.47e-06	1.69e-05
WBGene00020443	esyt-2	22.661	34.938	|		Extended SYnapTotagmin homolog [Source:UniProtKB/TrEMBL;Acc:O76835]	|	0.803538	0.000126	0.000853
WBGene00011034	paxt-1	25.952	40.028	|		Partner of xrn-2 protein 1 [Source:UniProtKB/Swiss-Prot;Acc:Q21738]	|	0.800334	1.2e-05	0.000109
WBGene00019841	R02F11.3	36.343	56.35	|	SLC transporter;SLC transporter: SLC30: cation diffusion facilitator (CDF) family		|	0.800063	9.44e-07	1.14e-05
WBGene00044202	K10G4.10	85.371	133.381	|			|	0.799299	0.00791	0.0277
WBGene00013358	abhd-3.1	26.534	40.927	|		ABHydrolase Domain containing homolog [Source:UniProtKB/TrEMBL;Acc:Q9U1Z6]	|	0.799081	0.0032	0.0132
WBGene00020026	R12C12.6	45.883	70.295	|			|	0.799023	8.05e-05	0.000578
WBGene00017766	peli-1	72.332	112.996	|		PELI1 and PELI2 related [Source:UniProtKB/TrEMBL;Acc:Q22967]	|	0.798251	3.58e-05	0.000285
WBGene00016661	C45B2.6	29.209	45.099	|			|	0.797754	3.01e-12	9.69e-11
WBGene00000757	col-184	436.625	672.866	|		COLlagen [Source:UniProtKB/TrEMBL;Acc:Q19470]	|	0.797229	0.0146	0.0457
WBGene00003561	ncr-1	17.554	27.37	|		NPC intracellular cholesterol transporter 1 homolog 1 [Source:UniProtKB/Swiss-Prot;Acc:Q19127]	|	0.796086	3.93e-05	0.000309
WBGene00011974	xbx-5	532.075	820.525	|		X-BoX promoter element regulated [Source:UniProtKB/TrEMBL;Acc:Q22709]	|	0.795652	7.77e-13	2.64e-11
WBGene00015353	C02F5.13	14.855	22.963	|		TM2 domain-containing protein C02F5.13 [Source:UniProtKB/Swiss-Prot;Acc:P61228]	|	0.795607	0.00499	0.0189
WBGene00022280	Y74C10AL.2	50.4	77.88	|			|	0.795461	3.81e-06	3.92e-05
WBGene00010425	lpin-1	15.149	23.368	|		LiPIN (Mammalian lipodystrophy associated) homolog [Source:UniProtKB/TrEMBL;Acc:Q9XXT5]	|	0.794463	2.65e-07	3.62e-06
WBGene00013632	Y105C5A.1	12.034	18.524	|			|	0.793564	8.25e-07	1.01e-05
WBGene00003656	nhr-66	17.712	27.272	|		Nuclear Hormone Receptor family [Source:UniProtKB/TrEMBL;Acc:W6RRP4]	|	0.793493	3.33e-10	7.86e-09
WBGene00012289	W05H12.1	141.378	218.114	|			|	0.793218	2.29e-06	2.49e-05
WBGene00011920	T22C1.11	67.279	104.218	|			|	0.793085	4.9e-06	4.91e-05
WBGene00017298	toca-1	33.562	51.888	|		Transducer of Cdc42-dependent actin assembly protein 1 homolog [Source:UniProtKB/Swiss-Prot;Acc:Q19253]	|	0.792948	2.27e-05	0.000191
WBGene00011366	T02C1.2	6.545	10.058	|			|	0.791608	0.0117	0.0382
WBGene00017914	F29A7.4	10.069	15.394	|			|	0.790566	0.00533	0.02
WBGene00006772	unc-36	71.463	110.023	|	Voltage-gated Calcium Channel	Voltage-dependent calcium channel unc-36 [Source:UniProtKB/Swiss-Prot;Acc:P34374]	|	0.790537	2.56e-06	2.74e-05
WBGene00044176	C30G7.2	26.672	41.306	|			|	0.790363	6.03e-06	5.93e-05
WBGene00003090	lys-1	91.336	139.673	|		Lysozyme-like protein 1 [Source:UniProtKB/Swiss-Prot;Acc:O62415]	|	0.790362	7.04e-07	8.73e-06
WBGene00013095	ing-3	13.253	20.431	|		Inhibitor of growth protein [Source:UniProtKB/TrEMBL;Acc:Q9XWJ8]	|	0.790037	0.000972	0.00489
WBGene00022369	Y92H12BR.3	15.294	23.469	|			|	0.79	8.49e-07	1.03e-05
WBGene00018854	nlf-1	10.168	15.497	|		NCA Localization Factor; NLF-1 [Source:UniProtKB/TrEMBL;Acc:M4Q8W4]	|	0.789397	0.000319	0.00188
WBGene00017852	F27C1.2	89.343	136.885	|			|	0.789276	7.55e-11	1.95e-09
WBGene00018013	phf-10	7.415	11.478	|		PHd Finger family [Source:UniProtKB/TrEMBL;Acc:Q2A949]	|	0.788472	0.00113	0.00552
WBGene00006352	sur-6	31.001	47.607	|		Serine/threonine-protein phosphatase 2A regulatory subunit sur-6 [Source:UniProtKB/Swiss-Prot;Acc:G5EDR3]	|	0.788423	6.56e-09	1.25e-07
WBGene00003827	ntl-4	54.255	83.539	|		NOT-Like (Yeast CCR4/NOT complex component) [Source:UniProtKB/TrEMBL;Acc:W6RTE4]	|	0.787823	8.01e-08	1.24e-06
WBGene00009583	aagr-3	87.563	133.849	|		Acid Alpha Glucosidase Relate [Source:UniProtKB/TrEMBL;Acc:J7SA48]	|	0.787463	6.16e-10	1.4e-08
WBGene00019915	tbc-10	11.774	18.07	|		TBC (Tre-2/Bub2/Cdc16) domain family [Source:UniProtKB/TrEMBL;Acc:O44873]	|	0.787367	0.00515	0.0194
WBGene00016165	wdr-60	112.331	172.138	|			|	0.787303	4.81e-11	1.29e-09
WBGene00010813	pitp-1	47.193	72.347	|		PhosphatidylInositol Transfer Protein family [Source:UniProtKB/TrEMBL;Acc:G5EED9]	|	0.786629	3.08e-16	1.58e-14
WBGene00021232	irld-15	260.682	397.4	|	Insulin/EGF receptor-like;Insulin/EGF receptor-like: transmembrane or membrane associated	Insulin/EGF-Receptor L Domain protein [Source:UniProtKB/TrEMBL;Acc:Q9N570]	|	0.786616	9.47e-07	1.14e-05
WBGene00010406	math-33	37.347	57.58	|		Ubiquitin carboxyl-terminal hydrolase 7 [Source:UniProtKB/Swiss-Prot;Acc:Q7JKC3]	|	0.785597	1.49e-06	1.7e-05
WBGene00012206	W02B12.11	17.965	27.467	|		N-acetyllactosamine synthase [Source:UniProtKB/TrEMBL;Acc:G5EGS9]	|	0.785491	4.36e-06	4.41e-05
WBGene00021956	Y57E12AL.1	51.202	77.906	|			|	0.784771	5.17e-08	8.39e-07
WBGene00014119	ZK858.6	16.019	24.606	|		Transmembrane 9 superfamily member [Source:UniProtKB/TrEMBL;Acc:Q7YTF9]	|	0.784687	5.29e-08	8.57e-07
WBGene00003076	lsm-1	12.022	18.638	|		U6 snRNA-associated Sm-like protein LSm1 [Source:UniProtKB/TrEMBL;Acc:Q20229]	|	0.784389	0.00591	0.0218
WBGene00003511	mxl-3	116.868	180.669	|		MaX-Like [Source:UniProtKB/TrEMBL;Acc:Q18711]	|	0.783835	4.99e-05	0.00038
WBGene00012833	Y43F8C.11	50.032	77.134	|			|	0.782193	0.00586	0.0217
WBGene00012547	Y37D8A.5	40.602	62.012	|			|	0.780018	0.000777	0.00406
WBGene00014800	nhr-200	11.925	18.319	|			|	0.779719	0.00104	0.00519
WBGene00006372	syx-2	21.367	32.808	|	Synaptic release machinery;Synaptic release machinery: Q-SNARE:Qa subtype	Putative syntaxin-2 [Source:UniProtKB/Swiss-Prot;Acc:Q20574]	|	0.779176	0.00226	0.00991
WBGene00016500	memo-1	110.053	167.44	|		Protein memo-1 homolog, partial [Source:RefSeq peptide;Acc:NP_001337309]	|	0.778908	6.43e-10	1.45e-08
WBGene00003645	nhr-55	13.839	20.987	|		Nuclear hormone receptor family member nhr-55 [Source:UniProtKB/Swiss-Prot;Acc:O16962]	|	0.77881	3.32e-05	0.000267
WBGene00022358	Y92H12A.2	39.615	60.088	|		E3 ubiquitin-protein ligase [Source:UniProtKB/TrEMBL;Acc:Q9BKW4]	|	0.77804	1.77e-06	1.98e-05
WBGene00019427	atg-16.2	14.631	22.422	|		Autophagic-related protein 16.2 [Source:UniProtKB/Swiss-Prot;Acc:Q09406]	|	0.77776	3.62e-06	3.75e-05
WBGene00001786	gst-38	17.108	25.96	|		Glutathione S-Transferase [Source:UniProtKB/TrEMBL;Acc:O45451]	|	0.777076	0.00347	0.0141
WBGene00011146	pde-2	71.879	110.325	|	Phosphodiesterase (PDE);Phosphodiesterase (PDE): cGMP-specific PDEs	Probable 3',5'-cyclic phosphodiesterase pde-2 [Source:UniProtKB/Swiss-Prot;Acc:P30645]	|	0.776468	1.04e-07	1.58e-06
WBGene00001628	gly-3	10.794	16.395	|		Polypeptide N-acetylgalactosaminyltransferase 3 [Source:UniProtKB/Swiss-Prot;Acc:P34678]	|	0.776177	7.64e-06	7.34e-05
WBGene00013197	ttm-5	7.471	11.375	|		Putative sphingolipid delta(4)-desaturase/C4-monooxygenase [Source:UniProtKB/Swiss-Prot;Acc:G5EC63]	|	0.776152	0.000641	0.00345
WBGene00020721	T23B12.6	7.468	11.291	|			|	0.77586	0.00144	0.00677
WBGene00007352	cdc-48.1	70.317	107.381	|		Transitional endoplasmic reticulum ATPase homolog 1 [Source:UniProtKB/Swiss-Prot;Acc:P54811]	|	0.775842	8.17e-09	1.54e-07
WBGene00007772	egrh-1	8.915	13.737	|		EGR (Early Growth factor Response factor) Homolog [Source:UniProtKB/TrEMBL;Acc:Q18250]	|	0.775788	0.00449	0.0173
WBGene00002363	let-92	113.943	173.748	|		Serine/threonine-protein phosphatase 2A catalytic subunit [Source:UniProtKB/Swiss-Prot;Acc:G5EGK8]	|	0.775381	1.41e-06	1.62e-05
WBGene00015479	wht-1	26.392	40.132	|		WHiTe (Drosophila) related ABC transporter [Source:UniProtKB/TrEMBL;Acc:A0A2K5ATT2]	|	0.774813	4.08e-08	6.81e-07
WBGene00016965	C56C10.9	10.862	16.42	|	Calcium binding protein;Calcium binding protein: Others		|	0.773515	0.00097	0.00488
WBGene00018386	F43C11.9	8.549	13.03	|			|	0.773498	0.000154	0.00101
WBGene00005367	srh-151	12.466	19.084	|			|	0.771885	0.000478	0.00268
WBGene00006840	unc-116	102.665	156.06	|	Kinesin;Kinesin: Family:Kinesin-1;Kinesin: Function:Vesicle, organelle and mRNA transport	Kinesin heavy chain [Source:UniProtKB/Swiss-Prot;Acc:P34540]	|	0.771198	4.11e-08	6.83e-07
WBGene00001491	frm-4	26.546	40.22	|		FERM domain (Protein4.1-ezrin-radixin-moesin) family [Source:UniProtKB/TrEMBL;Acc:H2KYZ6]	|	0.770319	1.42e-07	2.07e-06
WBGene00000459	ceh-38	10.561	15.966	|		Homeobox protein ceh-38 [Source:UniProtKB/Swiss-Prot;Acc:Q19720]	|	0.770083	0.00026	0.00158
WBGene00012156	ebp-2	104.642	158.18	|		Microtubule End Binding Protein [Source:UniProtKB/TrEMBL;Acc:Q9XXA2]	|	0.769441	3.09e-07	4.15e-06
WBGene00008767	F13G3.7	18.169	27.773	|			|	0.769271	6.89e-05	0.000504
WBGene00017699	flcn-1	62.02	94.765	|		FoLliCuliN [Source:UniProtKB/TrEMBL;Acc:S6FMZ4]	|	0.768004	0.000821	0.00424
WBGene00006414	raga-1	38.376	57.994	|		RAs-related GTP-binding protein A [Source:UniProtKB/TrEMBL;Acc:Q22743]	|	0.767091	3.09e-06	3.26e-05
WBGene00010724	K09E9.1	27.633	41.902	|			|	0.766499	2.11e-05	0.00018
WBGene00001676	gpa-14	13.008	19.918	|	GPCR signalling;GPCR signalling: Gα	Guanine nucleotide-binding protein alpha-14 subunit [Source:UniProtKB/Swiss-Prot;Acc:Q9BIG2]	|	0.764568	0.00243	0.0105
WBGene00009633	F42E11.3	1242.12	1882.52	|			|	0.7644	0.00385	0.0153
WBGene00006450	tag-77	16.085	24.464	|			|	0.76426	2.44e-05	0.000203
WBGene00022503	ZC13.2	183.612	278.122	|			|	0.764112	0.00124	0.00595
WBGene00005431	srh-221	105.419	160.675	|			|	0.7635	8.83e-05	0.000625
WBGene00004278	rab-19	147.656	223.006	|		RAB family [Source:UniProtKB/TrEMBL;Acc:Q9U1W9]	|	0.763468	3.01e-14	1.22e-12
WBGene00011705	clp-9	10.463	15.991	|		CaLPain family [Source:UniProtKB/TrEMBL;Acc:G5EEZ6]	|	0.762484	0.00734	0.0261
WBGene00303105	R07E5.19	24.496	37.042	|		Vacuolar ATPase assembly integral membrane protein VMA21 homolog [Source:UniProtKB/Swiss-Prot;Acc:A5JYQ9]	|	0.761845	0.00835	0.029
WBGene00017353	F10E9.1	136.453	206.092	|			|	0.761254	1.45e-06	1.67e-05
WBGene00008121	C46F11.6	55.086	83.706	|		Ubiquitin-like protein [Source:UniProtKB/TrEMBL;Acc:Q7YX48]	|	0.76069	1.48e-06	1.69e-05
WBGene00013365	Y60A3A.19	13.305	19.879	|			|	0.760344	0.000527	0.00291
WBGene00001127	dyf-11	49.199	74.394	|	Sensory cilia transport;Sensory cilia transport: IFT-B		|	0.759425	1.27e-07	1.88e-06
WBGene00000893	cyn-17	8.048	12.074	|		CYclophyliN [Source:UniProtKB/TrEMBL;Acc:A9D417]	|	0.758485	6.28e-06	6.16e-05
WBGene00016918	test-1	9.336	13.93	|		Vertebrate proteoglycan TESTican homolog [Source:UniProtKB/TrEMBL;Acc:H2KZF8]	|	0.758352	0.012	0.039
WBGene00016407	C34D10.2	33.813	50.944	|			|	0.758276	3.66e-06	3.78e-05
WBGene00013599	eipr-1	7.66	11.429	|		EARP-interacting protein 1 [Source:UniProtKB/Swiss-Prot;Acc:Q9U1Q0]	|	0.757376	1.46e-05	0.00013
WBGene00006941	wnk-1	59.183	89.842	|		Serine/threonine-protein kinase WNK [Source:UniProtKB/Swiss-Prot;Acc:X5M5N0]	|	0.757239	1.13e-05	0.000104
WBGene00005372	srh-156	647.927	982.933	|			|	0.757086	0.0061	0.0223
WBGene00018226	F40B5.2	13.672	20.532	|		Putative metallophosphoesterase F40B5.2 [Source:UniProtKB/Swiss-Prot;Acc:Q09320]	|	0.756653	6.21e-05	0.000461
WBGene00018910	F56A4.2	10.168	15.465	|		C-type LECtin [Source:UniProtKB/TrEMBL;Acc:G5EBG4]	|	0.755458	0.00431	0.0167
WBGene00000020	abt-2	31.184	46.987	|		ABC Transporter family [Source:UniProtKB/TrEMBL;Acc:Q1RS86]	|	0.755141	1.13e-07	1.69e-06
WBGene00004728	sax-2	32.927	49.54	|		Sensory AXon guidance [Source:UniProtKB/TrEMBL;Acc:Q5DX48]	|	0.754692	1.15e-11	3.41e-10
WBGene00015494	C05E11.3	24.093	36.089	|		Lysosomal-associated transmembrane protein [Source:UniProtKB/TrEMBL;Acc:G5EGG4]	|	0.754559	5.83e-05	0.000436
WBGene00013011	snx-14	23.466	35.624	|	GPCR signalling;GPCR signalling: RGS family	Sorting NeXin [Source:UniProtKB/TrEMBL;Acc:G5EF63]	|	0.753904	0.000742	0.00391
WBGene00010700	nipi-3	179.376	270.845	|			|	0.751312	1.32e-05	0.000119
WBGene00010279	letm-1	15.908	23.844	|		LETM1 (Leucine zipper, EF-hand, TransMembrane mitochondrial protein) homolog [Source:UniProtKB/TrEMBL;Acc:Q9XVL7]	|	0.751192	6.31e-06	6.18e-05
WBGene00045488	F57B1.9	87.088	130.635	|			|	0.750932	6.13e-05	0.000457
WBGene00004276	rab-14	23.049	34.646	|		RAB family [Source:UniProtKB/TrEMBL;Acc:Q93874]	|	0.750292	0.000938	0.00475
WBGene00007956	trpp-9	7.454	11.159	|		TRansport Protein Particle [Source:UniProtKB/TrEMBL;Acc:Q93330]	|	0.749616	1.72e-06	1.93e-05
WBGene00021929	dcap-1	13.523	20.218	|		mRNA DeCAPping enzyme [Source:UniProtKB/TrEMBL;Acc:Q9N363]	|	0.749599	6.89e-05	0.000504
WBGene00016633	C44B11.1	21.022	31.428	|			|	0.749523	0.000409	0.00233
WBGene00017923	F29B9.8	8.537	12.817	|			|	0.747058	0.00136	0.00646
WBGene00006721	ubh-1	23.36	34.598	|		Ubiquitin carboxyl-terminal hydrolase [Source:UniProtKB/TrEMBL;Acc:Q9UAV3]	|	0.746781	0.000408	0.00233
WBGene00015181	B0416.5	25.806	38.339	|			|	0.746506	9.42e-07	1.13e-05
WBGene00045056	F13H10.9	172.828	257.421	|			|	0.746251	2.33e-10	5.61e-09
WBGene00007016	mdt-15	87.417	131.076	|		Mediator of RNA polymerase II transcription subunit 15 [Source:UniProtKB/Swiss-Prot;Acc:Q21955]	|	0.7461	5.06e-08	8.25e-07
WBGene00012033	T26C5.3	22.256	33.026	|			|	0.745892	3.73e-08	6.28e-07
WBGene00018693	F52E1.3	10.797	16.138	|			|	0.745131	0.0024	0.0104
WBGene00044324	ufm-1	17.425	26.212	|		Ubiquitin-fold modifier 1 [Source:UniProtKB/Swiss-Prot;Acc:P34661]	|	0.744335	0.00405	0.0159
WBGene00001668	gpa-6	42.913	64.239	|	GPCR signalling;GPCR signalling: Gα	Guanine nucleotide-binding protein alpha-6 subunit [Source:UniProtKB/Swiss-Prot;Acc:Q93743]	|	0.743431	1.12e-05	0.000103
WBGene00000548	clr-1	10.057	14.873	|	Extracellular Immunoglobulin;Extracellular Immunoglobulin: Ig domain proteins	Receptor-type tyrosine-protein phosphatase [Source:UniProtKB/Swiss-Prot;Acc:H2KZM6]	|	0.742516	1.11e-08	2.05e-07
WBGene00011060	R06C1.6	54.577	81.096	|			|	0.74193	6.79e-06	6.6e-05
WBGene00009915	F52A8.1	27.09	40.235	|			|	0.741778	4.02e-05	0.000316
WBGene00006776	unc-40	14.121	20.933	|	Extracellular Immunoglobulin;Extracellular Immunoglobulin: Ig domain proteins	Unc-40 protein [Source:UniProtKB/TrEMBL;Acc:G5EF96]	|	0.74145	1.59e-11	4.58e-10
WBGene00003751	nlp-13	15.852	23.734	|	Neuropeptide;Neuropeptide: Neuropeptide-like proteins	Neuropeptide-Like Protein [Source:UniProtKB/TrEMBL;Acc:O44540]	|	0.740738	0.0059	0.0218
WBGene00005339	srh-120	43.156	64.812	|	Chemoreceptor;Chemoreceptor: Srh class	Serpentine Receptor, class H [Source:UniProtKB/TrEMBL;Acc:O45845]	|	0.740546	0.00552	0.0206
WBGene00018011	F33E11.3	26.373	39.436	|			|	0.740129	1.01e-05	9.45e-05
WBGene00016981	rpn-13	46.914	69.851	|		Proteasomal ubiquitin receptor ADRM1 homolog [Source:UniProtKB/Swiss-Prot;Acc:Q09289]	|	0.739982	1.05e-06	1.24e-05
WBGene00001788	gst-40	637.82	943.286	|		Glutathione S-Transferase [Source:UniProtKB/TrEMBL;Acc:O45115]	|	0.738754	1.04e-08	1.93e-07
WBGene00010681	mak-1	16.2	24.168	|		MAP kinase-activated protein kinase mak-1 [Source:UniProtKB/Swiss-Prot;Acc:Q21360]	|	0.738024	0.000118	0.0008
WBGene00006913	vha-4	40.138	59.291	|		VHA-4; Vacuolar H ATPase [Source:UniProtKB/TrEMBL;Acc:G5EDB8]	|	0.737791	1.6e-06	1.81e-05
WBGene00011734	mlc-5	37.538	55.703	|	Calcium binding protein;Calcium binding protein: Others	Myosin-2 essential light chain [Source:UniProtKB/Swiss-Prot;Acc:Q9XVI9]	|	0.737562	0.000331	0.00194
WBGene00006669	twk-14	150.122	222.991	|	Potassium Channel;Potassium Channel: TWK Channel family	TWiK family of potassium channels [Source:UniProtKB/TrEMBL;Acc:Q21094]	|	0.737482	1.18e-05	0.000108
WBGene00021059	atat-2	11.68	17.404	|		Alpha-tubulin N-acetyltransferase 2 [Source:UniProtKB/Swiss-Prot;Acc:Q23192]	|	0.737422	0.000309	0.00182
WBGene00006578	tli-1	23.807	35.752	|		ToLlIp homolog [Source:UniProtKB/TrEMBL;Acc:Q93565]	|	0.73696	0.0151	0.0468
WBGene00020891	T28C12.4	18.417	27.339	|		Carboxylic ester hydrolase [Source:UniProtKB/TrEMBL;Acc:Q4LDP0]	|	0.736902	1.12e-05	0.000103
WBGene00005341	srh-123	39.175	58.64	|	Chemoreceptor;Chemoreceptor: Srh class	Serpentine Receptor, class H [Source:UniProtKB/TrEMBL;Acc:Q9XXP5]	|	0.736214	0.00474	0.0181
WBGene00302978	C42C1.19	14.762	22.082	|			|	0.735972	0.00125	0.00601
WBGene00006975	zfp-1	68.794	101.961	|		Uncharacterized protein F54F2.2, isoform a [Source:UniProtKB/Swiss-Prot;Acc:P34447]	|	0.734914	1.29e-08	2.36e-07
WBGene00002176	jip-1	39.557	58.377	|		JNK Interacting Protein (Scaffold protein) [Source:UniProtKB/TrEMBL;Acc:G4RZC8]	|	0.734643	2.29e-08	4.01e-07
WBGene00021511	Y41D4B.1	10.82	15.788	|			|	0.734527	0.00677	0.0244
WBGene00006513	rimb-1	32.196	47.641	|		RIM Binding protein [Source:UniProtKB/TrEMBL;Acc:Q9N415]	|	0.732521	1.38e-09	2.96e-08
WBGene00000552	cmd-1	233.844	346.229	|	Calcium binding protein;Calcium binding protein: Calmodulin family	Calmodulin [Source:UniProtKB/Swiss-Prot;Acc:O16305]	|	0.73153	5.59e-06	5.52e-05
WBGene00000923	daf-31	21.134	31.226	|		N-alpha-acetyltransferase daf-31 [Source:UniProtKB/Swiss-Prot;Acc:O61219]	|	0.731078	0.00104	0.00517
WBGene00013689	bath-40	26.525	39.306	|		BTB and MATH domain-containing protein 40 [Source:UniProtKB/Swiss-Prot;Acc:Q9NF14]	|	0.7308	1.34e-05	0.000121
WBGene00002980	lgg-1	200.552	298.205	|			|	0.730742	9.02e-05	0.000636
WBGene00000995	die-1	11.54	17.225	|		Dorsal Intercalation and Elongation defect [Source:UniProtKB/TrEMBL;Acc:A0A131MCL4]	|	0.730687	0.00122	0.00588
WBGene00011115	R07E5.7	14.013	20.667	|			|	0.727718	0.00162	0.00749
WBGene00005149	sre-1	132.788	195.553	|	Chemoreceptor;Chemoreceptor: Sre class	Serpentine receptor class epsilon-1 [Source:UniProtKB/Swiss-Prot;Acc:Q09213]	|	0.726637	0.00196	0.00879
WBGene00004923	snt-3	28.102	41.304	|	Synaptic release machinery;Synaptic release machinery: synaptotagmin	SyNapTotagmin [Source:UniProtKB/TrEMBL;Acc:Q965S5]	|	0.726383	5.54e-05	0.000417
WBGene00001130	dyn-1	44.512	65.717	|		Dynamin [Source:UniProtKB/Swiss-Prot;Acc:P39055]	|	0.725765	3.86e-06	3.95e-05
WBGene00015975	cas-2	46.712	68.471	|		Adenylyl cyclase-associated protein [Source:UniProtKB/TrEMBL;Acc:A0A061ACX4]	|	0.725023	1.78e-09	3.73e-08
WBGene00015579	C07H6.2	25.637	37.283	|			|	0.724662	0.00353	0.0143
WBGene00006917	vha-8	24.284	35.606	|		Vacuolar H ATPase [Source:UniProtKB/TrEMBL;Acc:Q95X44]	|	0.724435	4.95e-05	0.000377
WBGene00005530	sri-18	16.354	24.181	|	Chemoreceptor;Chemoreceptor: Sri class	Serpentine Receptor, class I [Source:UniProtKB/TrEMBL;Acc:O62413]	|	0.724282	0.00126	0.00603
WBGene00021239	Y20F4.4	15.333	22.622	|			|	0.724053	0.000211	0.00132
WBGene00004401	rom-2	22.81	33.696	|		Rhomboid-related protein 2 [Source:UniProtKB/Swiss-Prot;Acc:P34356]	|	0.723762	0.00769	0.0271
WBGene00016827	sre-53	141.769	210.015	|	Chemoreceptor;Chemoreceptor: Sre class	Serpentine Receptor, class E (Epsilon) [Source:UniProtKB/TrEMBL;Acc:A3QMA1]	|	0.723735	0.00157	0.00727
WBGene00017787	nhr-141	12.364	18.221	|		Nuclear Hormone Receptor family [Source:UniProtKB/TrEMBL;Acc:H2KYV4]	|	0.723698	0.000776	0.00405
WBGene00006749	unc-9	23.415	34.351	|	Gap-junction;Gap-junction: Neuronally expressed	Innexin unc-9 [Source:UniProtKB/Swiss-Prot;Acc:O01393]	|	0.72258	7.07e-08	1.11e-06
WBGene00001663	gpa-1	87.653	128.129	|	GPCR signalling;GPCR signalling: Gα	Guanine nucleotide-binding protein alpha-1 subunit [Source:UniProtKB/Swiss-Prot;Acc:P28051]	|	0.722161	0.000551	0.00303
WBGene00013224	Y55D9A.2	8.021	11.768	|			|	0.722018	0.00636	0.0232
WBGene00001508	fut-8	10.134	14.928	|		Alpha-(1,6)-fucosyltransferase [Source:UniProtKB/Swiss-Prot;Acc:G5EFE7]	|	0.721966	0.000608	0.0033
WBGene00013225	Y56A3A.2	15.188	22.211	|			|	0.721779	0.00105	0.00522
WBGene00008531	F02E9.7	10.733	15.808	|			|	0.72177	1.25e-05	0.000113
WBGene00009306	maph-1.1	75.368	110.708	|		Microtubule-associated protein homolog maph-1.1 [Source:UniProtKB/Swiss-Prot;Acc:P91859]	|	0.721007	9.77e-08	1.49e-06
WBGene00002010	hsp-6	64.731	94.561	|		Heat shock 70 kDa protein F, mitochondrial [Source:UniProtKB/Swiss-Prot;Acc:P11141]	|	0.72095	4.2e-07	5.51e-06
WBGene00012875	Y45F10B.13	95.841	141.742	|			|	0.720862	0.000347	0.00202
WBGene00009025	phf-34	6.835	10.063	|		PHd Finger family [Source:UniProtKB/TrEMBL;Acc:Q93548]	|	0.719891	0.00391	0.0155
WBGene00009912	srz-94	107.371	158.052	|	Chemoreceptor;Chemoreceptor: Srz class	Serpentine Receptor, class Z [Source:UniProtKB/TrEMBL;Acc:Q9XV00]	|	0.719726	0.0012	0.00582
WBGene00006601	tpi-1	40.643	59.621	|		Triosephosphate isomerase [Source:UniProtKB/Swiss-Prot;Acc:Q10657]	|	0.719447	7.07e-05	0.000515
WBGene00014150	ZK909.6	23.321	33.945	|			|	0.719278	0.00655	0.0238
WBGene00000254	bli-4	8.096	11.876	|	Neuropeptide processing;Neuropeptide processing: Maturation	Endoprotease bli-4 [Source:UniProtKB/Swiss-Prot;Acc:P51559]	|	0.71891	7.9e-05	0.000569
WBGene00011259	miz-1	41.445	60.877	|		MIZ-type zinc finger putative transcription factor [Source:UniProtKB/TrEMBL;Acc:A0A061AE46]	|	0.718798	2.96e-05	0.000242
WBGene00018413	cyp-33C4	52.708	77.513	|		CYtochrome P450 family [Source:UniProtKB/TrEMBL;Acc:O16362]	|	0.718773	1.33e-06	1.54e-05
WBGene00004766	sel-9	71.633	104.419	|		Suppressor/enhancer of lin-12 protein 9 [Source:UniProtKB/Swiss-Prot;Acc:O17528]	|	0.718582	9.53e-09	1.78e-07
WBGene00001019	dnj-1	19.593	28.817	|		DnaJ homolog subfamily B member 1 [Source:UniProtKB/Swiss-Prot;Acc:Q17438]	|	0.718083	2.62e-05	0.000217
WBGene00011994	samp-1	20.747	30.255	|		Transmembrane protein 201 homolog [Source:UniProtKB/Swiss-Prot;Acc:Q22747]	|	0.717936	3.22e-05	0.00026
WBGene00005539	sri-27	96.372	142.493	|	Chemoreceptor;Chemoreceptor: Sri class	Serpentine Receptor, class I [Source:UniProtKB/TrEMBL;Acc:O44574]	|	0.717745	0.00997	0.0335
WBGene00005692	sru-29	48.663	71.503	|	Chemoreceptor;Chemoreceptor: Sru class	Serpentine Receptor, class U [Source:UniProtKB/TrEMBL;Acc:Q18729]	|	0.717716	0.00308	0.0128
WBGene00010199	bet-2	23.169	34.078	|		BET (Two bromodomains) family protein [Source:UniProtKB/TrEMBL;Acc:A0A0K3ASR2]	|	0.717171	7.08e-06	6.85e-05
WBGene00013415	ilcr-1	77.949	113.788	|		Interleukin cytokine receptor-related protein 1 [Source:UniProtKB/Swiss-Prot;Acc:Q9NA64]	|	0.717048	1.77e-08	3.16e-07
WBGene00013223	efa-6	10.241	14.842	|		Exchange factor for Arf-6 [Source:UniProtKB/Swiss-Prot;Acc:G5EET6]	|	0.716997	0.000121	0.000819
WBGene00005377	srh-161	1000.26	1480.18	|			|	0.71639	0.0125	0.0404
WBGene00004206	pst-1	9.458	13.905	|		Adenosine 3'-phospho 5'-phosphosulfate transporter 1 [Source:UniProtKB/Swiss-Prot;Acc:Q8MXJ9]	|	0.716372	3.63e-05	0.000288
WBGene00016279	C31B8.1	73.541	107.997	|			|	0.716044	6.08e-05	0.000454
WBGene00009552	piki-1	10.402	15.239	|		Phosphatidylinositol 3-kinase piki-1 [Source:UniProtKB/Swiss-Prot;Acc:G5EDY0]	|	0.715851	1.04e-07	1.58e-06
WBGene00004110	pqn-20	16.545	24.202	|		Prion-like-(Q/N-rich)-domain-bearing protein [Source:UniProtKB/TrEMBL;Acc:O01505]	|	0.715519	1.34e-05	0.000121
WBGene00022748	oaz-1	378.214	552.573	|		Ornithine decarboxylase antizyme [Source:UniProtKB/Swiss-Prot;Acc:Q9NHZ6]	|	0.71512	7.14e-10	1.6e-08
WBGene00016810	C50D2.7	12.71	18.642	|		Probable ADP-dependent glucokinase [Source:UniProtKB/Swiss-Prot;Acc:Q86S40]	|	0.714856	0.00043	0.00244
WBGene00021811	ral-1	111.764	163.285	|		RAL (Ras-related GTPase) homolog [Source:UniProtKB/TrEMBL;Acc:Q9N3F8]	|	0.714467	6.67e-06	6.49e-05
WBGene00013642	daf-38	158.895	231.346	|	Neuropeptide receptors;Neuropeptide receptors: Gonadotropin-releasing hormone receptor family	G-protein coupled receptor daf-38 [Source:UniProtKB/Swiss-Prot;Acc:Q9U320]	|	0.714361	2.27e-07	3.17e-06
WBGene00013919	ZC506.1	8.458	12.324	|		alpha-1,2-Mannosidase [Source:UniProtKB/TrEMBL;Acc:Q09641]	|	0.714317	3.32e-07	4.44e-06
WBGene00001405	fce-1	12.334	18.018	|		CAAX prenyl protease 1 homolog [Source:UniProtKB/Swiss-Prot;Acc:Q9XVE5]	|	0.714191	0.00224	0.00982
WBGene00015162	algn-11	13.421	19.671	|		GDP-Man:Man(3)GlcNAc(2)-PP-Dol alpha-1,2-mannosyltransferase [Source:UniProtKB/Swiss-Prot;Acc:P53993]	|	0.713526	0.0014	0.00661
WBGene00010012	saeg-1	92.145	134.564	|		Suppressor of activated egl-4 protein 1 [Source:UniProtKB/Swiss-Prot;Acc:Q20733]	|	0.713313	8.45e-08	1.3e-06
WBGene00006757	unc-18	60.882	89.642	|	Synaptic release machinery;Synaptic release machinery: Munc-18	Putative acetylcholine regulator unc-18 [Source:UniProtKB/Swiss-Prot;Acc:P34815]	|	0.713224	5.7e-05	0.000427
WBGene00012004	dyrb-1	81.746	119.381	|	Dynein motors;Dynein motors: Light chain (Roadblock-type)	Dynein light chain roadblock [Source:UniProtKB/TrEMBL;Acc:Q22752]	|	0.712488	0.000249	0.00152
WBGene00022233	ipla-6	8.399	12.357	|		Intracelllar PhosphoLipase A family [Source:UniProtKB/TrEMBL;Acc:Q8MXR3]	|	0.712166	0.00314	0.013
WBGene00012644	rabx-5	36.666	53.724	|		RAB eXchange factor [Source:UniProtKB/TrEMBL;Acc:Q8I100]	|	0.710861	0.00058	0.00317
WBGene00010806	M01E5.3	30.197	43.804	|			|	0.710799	7.27e-07	8.97e-06
WBGene00004367	ric-8	30.465	44.513	|	GPCR signalling;GPCR signalling: Gα GEF	Synembryn [Source:UniProtKB/Swiss-Prot;Acc:Q9GSX9]	|	0.710137	2.23e-05	0.000188
WBGene00015817	C16A11.4	56.167	81.555	|			|	0.709637	2.61e-05	0.000216
WBGene00011375	T02E1.2	23.706	34.723	|			|	0.709143	6.95e-05	0.000508
WBGene00009829	F47G9.1	19.571	28.271	|			|	0.709019	0.000503	0.0028
WBGene00008040	ttr-5	86.822	127.441	|		Transthyretin-like protein 5 [Source:UniProtKB/Swiss-Prot;Acc:Q03575]	|	0.708967	0.0008	0.00415
WBGene00005574	sri-62	118.054	171.649	|	Chemoreceptor;Chemoreceptor: Sri class	Serpentine Receptor, class I [Source:UniProtKB/TrEMBL;Acc:Q965L7]	|	0.708334	1.08e-07	1.63e-06
WBGene00013878	atfs-1	41.556	60.686	|		Stress activated transcription factor atfs-1 [Source:UniProtKB/Swiss-Prot;Acc:Q23272]	|	0.706941	0.000378	0.00218
WBGene00119203	T04A8.18	56.712	82.651	|			|	0.706715	0.00019	0.00121
WBGene00000938	dcp-66	19.973	28.934	|		Deacetylase Complex Protein [Source:UniProtKB/TrEMBL;Acc:G5ED89]	|	0.706649	2.79e-08	4.81e-07
WBGene00017951	panl-2	8.734	12.678	|		PAN (PolyA-specific riboNucLease) subunit [Source:RefSeq peptide;Acc:NP_498519]	|	0.706399	1.28e-05	0.000116
WBGene00044903	K03H1.13	15.421	22.405	|			|	0.705478	0.000249	0.00152
WBGene00007428	wdr-20	19.4	28.211	|		WD repeat-containing protein 20 homolog [Source:UniProtKB/Swiss-Prot;Acc:D9N129]	|	0.705175	1.44e-06	1.66e-05
WBGene00003826	ntl-3	35.393	51.346	|		NOT-Like (Yeast CCR4/NOT complex component) [Source:UniProtKB/TrEMBL;Acc:Q0PDJ7]	|	0.704542	1.12e-10	2.82e-09
WBGene00001629	gly-4	10.751	15.5	|		Polypeptide N-acetylgalactosaminyltransferase 4 [Source:UniProtKB/Swiss-Prot;Acc:Q8I136]	|	0.703265	5.07e-05	0.000384
WBGene00002845	let-711	48.689	70.917	|		NTL-1a [Source:UniProtKB/TrEMBL;Acc:Q20937]	|	0.702992	1.42e-07	2.07e-06
WBGene00006807	unc-75	88.436	128.881	|		Putative RNA-binding protein [Source:UniProtKB/TrEMBL;Acc:G5EE68]	|	0.702741	0.000102	0.000708
WBGene00003508	mut-16	10.041	14.515	|		MUTator [Source:UniProtKB/TrEMBL;Acc:O62011]	|	0.702063	0.000238	0.00146
WBGene00005363	srh-147	356.488	519.647	|	Chemoreceptor;Chemoreceptor: Srh class	Serpentine Receptor, class H [Source:UniProtKB/TrEMBL;Acc:Q7YXA8]	|	0.701752	0.000467	0.00262
WBGene00004053	tank-1	43.104	62.395	|		Poly [ADP-ribose] polymerase tankyrase [Source:UniProtKB/Swiss-Prot;Acc:Q9TXQ1]	|	0.701377	6.18e-12	1.91e-10
WBGene00006798	unc-64	39.104	56.622	|	Synaptic release machinery;Synaptic release machinery: Q-SNARE:Qa subtype	Syntaxin-1A homolog [Source:UniProtKB/Swiss-Prot;Acc:O16000]	|	0.700988	5.05e-06	5.04e-05
WBGene00019697	M01B12.4	34.255	49.932	|			|	0.700332	2.24e-05	0.000189
WBGene00023463	srz-82	99.893	145.218	|	Chemoreceptor;Chemoreceptor: Srz class	Serpentine Receptor, class Z [Source:UniProtKB/TrEMBL;Acc:Q6A588]	|	0.700241	0.0032	0.0132
WBGene00000900	daf-4	28.621	41.471	|		Cell surface receptor daf-4 [Source:UniProtKB/Swiss-Prot;Acc:P50488]	|	0.700191	4.16e-07	5.47e-06
WBGene00006996	zyg-11	9.147	13.272	|		Early embryogenesis protein zyg-11 [Source:UniProtKB/Swiss-Prot;Acc:P21541]	|	0.700183	2.26e-05	0.00019
WBGene00004736	sca-1	118.16	169.997	|		Calcium-transporting ATPase [Source:UniProtKB/TrEMBL;Acc:Q9XU13]	|	0.699937	5.01e-08	8.18e-07
WBGene00012216	W02D9.10	73.566	105.721	|			|	0.697962	7.24e-07	8.95e-06
WBGene00018486	glb-16	59.022	85.462	|	Gas receptors;Gas receptors: Globin	GLoBin related [Source:UniProtKB/TrEMBL;Acc:Q9GYP4]	|	0.697219	4.41e-05	0.000342
WBGene00013014	Y48E1C.1	11.346	16.264	|			|	0.69721	0.000708	0.00376
WBGene00004057	pmk-3	253.571	364.936	|		Mitogen-activated protein kinase pmk-3 [Source:UniProtKB/Swiss-Prot;Acc:O44514]	|	0.696282	7.03e-06	6.81e-05
WBGene00008256	glb-12	82.616	120.195	|	Gas receptors;Gas receptors: Globin	GLoBin related [Source:UniProtKB/TrEMBL;Acc:Q09514]	|	0.695729	0.0054	0.0202
WBGene00003930	pat-3	19.666	28.295	|		Integrin beta pat-3 [Source:UniProtKB/Swiss-Prot;Acc:Q27874]	|	0.695078	9.34e-11	2.4e-09
WBGene00021456	rfip-2	20.425	29.601	|			|	0.694895	0.00165	0.0076
WBGene00016378	imp-3	22.973	33.152	|		IntraMembrane Protease (IMPAS) family [Source:UniProtKB/TrEMBL;Acc:W6SBE0]	|	0.694179	0.00283	0.0119
WBGene00004031	pis-1	9.193	13.183	|		PIS (Pax-2, IA-1/6, Smad-2 interacting protein) homolog [Source:UniProtKB/TrEMBL;Acc:Q9U370]	|	0.69404	0.000168	0.00108
WBGene00012287	sre-33	87.523	125.357	|	Chemoreceptor;Chemoreceptor: Sre class	Serpentine receptor class epsilon-33 [Source:UniProtKB/Swiss-Prot;Acc:O18175]	|	0.693635	1.46e-06	1.68e-05
WBGene00006751	unc-11	64.733	93.266	|		Phosphatidylinositol-binding clathrin assembly protein unc-11 [Source:UniProtKB/Swiss-Prot;Acc:Q9XZI6]	|	0.692417	8.4e-12	2.55e-10
WBGene00011564	ugt-50	11.042	15.883	|		Putative UDP-glucuronosyltransferase ugt-50 [Source:UniProtKB/Swiss-Prot;Acc:Q22295]	|	0.692236	0.00191	0.0086
WBGene00004208	ptc-1	116.092	167.48	|			|	0.692204	1.6e-11	4.59e-10
WBGene00022297	Y76B12C.3	34.042	48.773	|			|	0.691585	0.00197	0.00881
WBGene00009337	uig-1	48.293	69.789	|		UNC-112-Interacting Guanine nucleotide exchange factor [Source:UniProtKB/TrEMBL;Acc:H1UBJ0]	|	0.690968	0.000712	0.00377
WBGene00000292	cap-1	35.087	50.293	|		F-actin-capping protein subunit alpha [Source:UniProtKB/Swiss-Prot;Acc:P34685]	|	0.690463	8.46e-07	1.03e-05
WBGene00002003	hse-5	16.665	23.822	|		D-glucuronyl C5-epimerase [Source:UniProtKB/Swiss-Prot;Acc:P46555]	|	0.689688	2.16e-05	0.000183
WBGene00011763	T14B1.1	8.19	11.716	|			|	0.689397	0.00503	0.019
WBGene00077621	Y70C5C.8	31.219	45.385	|			|	0.688505	0.0125	0.0404
WBGene00044418	C08G5.7	12.436	17.857	|			|	0.688408	0.00242	0.0105
WBGene00000134	amt-2	37.853	54.126	|		Putative ammonium transporter 2 [Source:UniProtKB/Swiss-Prot;Acc:Q20605]	|	0.688007	2.06e-05	0.000176
WBGene00005364	srh-148	113.469	163.899	|	Chemoreceptor;Chemoreceptor: Srh class	Serpentine Receptor, class H [Source:UniProtKB/TrEMBL;Acc:Q93867]	|	0.687905	7.42e-05	0.000538
WBGene00011482	hpo-4	13.267	19.016	|		Putative GPI-anchor transamidase [Source:UniProtKB/Swiss-Prot;Acc:P49048]	|	0.687867	2.73e-05	0.000225
WBGene00019643	K11C4.2	332.121	474.172	|			|	0.687723	1.61e-06	1.81e-05
WBGene00009112	tag-353	22.551	32.423	|			|	0.687507	0.000616	0.00334
WBGene00021313	paqr-2	18.616	26.762	|		Progestin and AdipoQ Receptor family [Source:UniProtKB/TrEMBL;Acc:Q9N536]	|	0.686608	5.09e-08	8.28e-07
WBGene00000904	daf-8	9.879	14.244	|		Dwarfin sma [Source:UniProtKB/TrEMBL;Acc:Q21733]	|	0.685886	0.000986	0.00495
WBGene00002242	kvs-1	78.581	112.605	|	Potassium Channel;Potassium Channel: Voltage-gated: Shab/K 3		|	0.685826	7.47e-10	1.67e-08
WBGene00019946	chat-1	43.969	62.858	|		CDC50 family protein chat-1 [Source:UniProtKB/Swiss-Prot;Acc:H2L0H3]	|	0.685784	7.84e-09	1.48e-07
WBGene00016509	adss-1	76.948	110.02	|		Adenylosuccinate synthetase [Source:UniProtKB/Swiss-Prot;Acc:P91134]	|	0.685279	2.91e-07	3.94e-06
WBGene00006742	unc-2	64.386	92.214	|	Voltage-gated Calcium Channel;Voltage-gated Calcium Channel: non L-type	High voltage activated calcium channel alpha-1 subunit [Source:UniProtKB/TrEMBL;Acc:Q86G45]	|	0.68498	6.25e-11	1.65e-09
WBGene00003892	osm-12	156.703	223.89	|	Sensory cilia transport;Sensory cilia transport: BBSome	Bardet-Biedl syndrome 7 protein homolog [Source:UniProtKB/Swiss-Prot;Acc:Q9XW70]	|	0.683748	1.31e-09	2.83e-08
WBGene00007010	alx-1	44.569	64.202	|		Apoptosis-linked gene 2-interacting protein X 1 [Source:UniProtKB/Swiss-Prot;Acc:P34552]	|	0.683627	0.000176	0.00113
WBGene00013711	Y106G6G.2	59.514	85.247	|			|	0.683362	2.65e-05	0.000219
WBGene00022704	ZK353.9	20.517	29.025	|		PITH domain-containing protein ZK353.9 [Source:UniProtKB/Swiss-Prot;Acc:Q95ZI6]	|	0.68287	0.000899	0.00458
WBGene00018974	fcho-1	19.592	28.122	|		FCH domain Only (FCH stands for Fes/CIP4 homology domain) [Source:UniProtKB/TrEMBL;Acc:Q9TXS0]	|	0.682188	9.03e-07	1.09e-05
WBGene00007809	C29F4.3	561.85	801.311	|			|	0.681577	3.32e-15	1.54e-13
WBGene00008733	F13B12.6	61.324	87.52	|			|	0.68147	0.000268	0.00161
WBGene00007029	mys-1	15.498	22.037	|		Histone acetyltransferase Tip60 homolog [Source:UniProtKB/Swiss-Prot;Acc:Q9TYU5]	|	0.680656	0.000145	0.000962
WBGene00017691	ilys-5	57.44	82.191	|		Invertebrate LYSozyme [Source:UniProtKB/TrEMBL;Acc:Q19698]	|	0.680211	0.00407	0.016
WBGene00008274	C53B4.4	21.43	30.459	|	PDZ domain protein		|	0.679536	1.54e-10	3.8e-09
WBGene00009242	sre-6	19.182	27.529	|	Chemoreceptor;Chemoreceptor: Sre class	Serpentine receptor class epsilon-6 [Source:UniProtKB/Swiss-Prot;Acc:Q19897]	|	0.678726	0.000235	0.00145
WBGene00020770	eat-17	8.561	12.173	|			|	0.678312	0.000713	0.00378
WBGene00016837	syf-1	33.468	47.748	|		SYF pre-mRNA splicing factor homolog [Source:UniProtKB/TrEMBL;Acc:P91175]	|	0.677843	2.96e-08	5.07e-07
WBGene00016244	C30B5.2	26.88	38.021	|		Vacuolar protein sorting-associated protein 55 homolog [Source:UniProtKB/Swiss-Prot;Acc:Q18319]	|	0.676462	0.00044	0.00249
WBGene00006391	taf-9	21.8	31.055	|		TAF (TBP-associated transcription factor) family [Source:UniProtKB/TrEMBL;Acc:O45784]	|	0.676267	0.000242	0.00148
WBGene00012847	srxa-15	60.377	86.311	|	Chemoreceptor;Chemoreceptor: Srxa class	Serpentine Receptor, class XA [Source:UniProtKB/TrEMBL;Acc:M1ZK02]	|	0.676207	0.00727	0.0259
WBGene00000840	cul-5	14.166	20.23	|		Cullin-5 [Source:UniProtKB/Swiss-Prot;Acc:Q23639]	|	0.675941	8.39e-05	0.000599
WBGene00005328	srh-109	157.924	226.017	|	Chemoreceptor;Chemoreceptor: Srh class	Serpentine Receptor, class H [Source:UniProtKB/TrEMBL;Acc:O45795]	|	0.675542	0.00218	0.00959
WBGene00011828	nepr-1	31.784	45.037	|		Nuclear envelope phosphatase-regulatory subunit 1 homolog [Source:UniProtKB/Swiss-Prot;Acc:Q9XXN3]	|	0.675466	9.52e-05	0.000665
WBGene00022697	cyy-1	11.186	15.884	|		Cyclin-Y [Source:UniProtKB/Swiss-Prot;Acc:P34624]	|	0.675435	0.000541	0.00299
WBGene00000369	ccf-1	28.5	40.425	|		CCR4-NOT transcription complex subunit 7 [Source:UniProtKB/Swiss-Prot;Acc:Q17345]	|	0.674041	0.00105	0.00522
WBGene00009201	F28C1.3	17.239	24.466	|		Protein phosphatase 1 regulatory subunit 37 homolog [Source:UniProtKB/Swiss-Prot;Acc:Q19857]	|	0.6728	1.53e-10	3.79e-09
WBGene00002217	klp-4	18.838	26.9	|	Kinesin;Kinesin: Family:Kinesin-4;Kinesin: Function:Vesicle transport	Kinesin-like protein [Source:UniProtKB/TrEMBL;Acc:Q8IG10]	|	0.672608	1.18e-06	1.39e-05
WBGene00021936	zipt-15	11.429	16.308	|		Zrt (ZRT), Irt-(IRT-) like Protein Transporter [Source:UniProtKB/TrEMBL;Acc:U4PS08]	|	0.672472	0.00219	0.00963
WBGene00012802	set-25	12.711	17.996	|		Histone-lysine N-methyltransferase set-25 [Source:UniProtKB/Swiss-Prot;Acc:G5EEU2]	|	0.672056	0.000817	0.00423
WBGene00019077	zipt-11	22.614	31.636	|		Zrt (ZRT), Irt-(IRT-) like Protein Transporter [Source:UniProtKB/TrEMBL;Acc:P91354]	|	0.671252	0.00279	0.0118
WBGene00000836	cul-1	21.228	30.278	|		Cullin-1 [Source:UniProtKB/Swiss-Prot;Acc:Q17389]	|	0.671068	0.000185	0.00118
WBGene00015303	rga-6	173.436	247.504	|		Rho GTPase Activating protein [Source:UniProtKB/TrEMBL;Acc:H2KYD2]	|	0.671013	0.000103	0.000714
WBGene00003630	nhr-40	29.562	41.8	|		Nuclear hormone receptor family member nhr-40 [Source:UniProtKB/Swiss-Prot;Acc:Q22127]	|	0.670652	0.000105	0.000725
WBGene00001510	fzr-1	18.034	25.591	|		FiZzy Related family [Source:UniProtKB/TrEMBL;Acc:Q09649]	|	0.670464	9.16e-07	1.11e-05
WBGene00019023	F58A6.2	178.37	251.7	|			|	0.670158	2.93e-07	3.96e-06
WBGene00020097	larp-1	69.776	98.894	|		La-related protein 1 [Source:UniProtKB/Swiss-Prot;Acc:D5MCN2]	|	0.670107	7.36e-17	4.02e-15
WBGene00020482	T13C2.7	105.614	149.365	|			|	0.668742	4.9e-09	9.55e-08
WBGene00003047	lis-1	26.892	38.236	|		Lissencephaly-1 homolog [Source:UniProtKB/Swiss-Prot;Acc:Q9NDC9]	|	0.668642	0.000138	0.000922
WBGene00000101	aka-1	18.575	26.241	|		A Kinase Anchor protein [Source:UniProtKB/TrEMBL;Acc:H2KZI9]	|	0.668174	1.01e-06	1.2e-05
WBGene00010388	srz-42	9.261	13.157	|	Chemoreceptor;Chemoreceptor: Srz class	Serpentine Receptor, class Z [Source:UniProtKB/TrEMBL;Acc:O45618]	|	0.667978	0.0116	0.0379
WBGene00001602	gln-1	23.889	33.906	|		GLutamiNe synthetase (Glutamate-ammonia ligase) [Source:UniProtKB/TrEMBL;Acc:Q95YD1]	|	0.666614	1.51e-05	0.000134
WBGene00018518	F46H5.2	7.442	10.462	|			|	0.666082	0.000456	0.00257
WBGene00009920	abts-1	100.599	141.406	|	SLC transporter;SLC transporter: SLC4: Cl− HCO−	Anion exchange protein [Source:UniProtKB/TrEMBL;Acc:B3WFV9]	|	0.665424	5.35e-06	5.33e-05
WBGene00006741	unc-1	21.674	30.391	|	Auxiliary subunit for:: DEG/ENaC channels (and perhaps TRP)	Protein unc-1; Stomatin-like protein UNC-1 [Source:UniProtKB/TrEMBL;Acc:G5ED08]	|	0.663202	0.00021	0.00132
WBGene00001851	hif-1	185.309	261.673	|		Hypoxia-inducible factor 1 [Source:UniProtKB/Swiss-Prot;Acc:G5EGD2]	|	0.66303	1.35e-06	1.57e-05
WBGene00005577	sri-65	30.03	41.955	|	Chemoreceptor;Chemoreceptor: Sri class	Serpentine Receptor, class I [Source:UniProtKB/TrEMBL;Acc:O45356]	|	0.662526	0.0024	0.0104
WBGene00012131	T28F3.5	8.56	12.229	|			|	0.662374	0.00363	0.0146
WBGene00017929	grld-1	18.827	26.556	|		Glutamate Receptor Level Decreased [Source:UniProtKB/TrEMBL;Acc:Q8MXG5]	|	0.661698	4.99e-05	0.00038
WBGene00003084	lst-2	9.681	13.621	|		Lateral signaling target protein 2 [Source:UniProtKB/Swiss-Prot;Acc:Q9TZD0]	|	0.661458	1.9e-06	2.1e-05
WBGene00001187	egl-19	38.683	54.366	|	Voltage-gated Calcium Channel;Voltage-gated Calcium Channel: L-type	Voltage-dependent L-type calcium channel subunit alpha [Source:UniProtKB/TrEMBL;Acc:W6RY76]	|	0.660867	3.51e-08	5.93e-07
WBGene00013345	Y59A8B.8	12.586	17.768	|			|	0.660242	0.00896	0.0307
WBGene00010688	srz-12	76.579	108.785	|	Chemoreceptor;Chemoreceptor: Srz class	Serpentine Receptor, class Z [Source:UniProtKB/TrEMBL;Acc:Q93869]	|	0.660204	0.0022	0.00968
WBGene00008019	C38H2.2	11.737	16.287	|		Glycoprotein-N-acetylgalactosamine 3-beta-galactosyltransferase 1 [Source:UniProtKB/Swiss-Prot;Acc:Q18515]	|	0.659763	0.0091	0.0311
WBGene00022361	Y92H12A.5	17.618	24.876	|			|	0.659712	1.36e-07	2e-06
WBGene00016975	nhr-173	13.119	18.61	|		Nuclear Hormone Receptor family [Source:UniProtKB/TrEMBL;Acc:Q18895]	|	0.659482	0.00453	0.0174
WBGene00020798	T25D3.4	7.604	10.612	|			|	0.659152	0.00234	0.0102
WBGene00012550	spcs-2	31.473	43.84	|		Probable signal peptidase complex subunit 2 [Source:UniProtKB/Swiss-Prot;Acc:Q9XWW1]	|	0.65858	0.000258	0.00156
WBGene00015551	C06G3.5	27.236	38.275	|			|	0.658308	5.58e-07	7.08e-06
WBGene00001368	exc-7	18.448	26.042	|			|	0.658217	0.00156	0.00724
WBGene00011329	zipt-9	29.585	41.538	|		Zrt (ZRT), Irt-(IRT-) like Protein Transporter [Source:UniProtKB/TrEMBL;Acc:Q9XVJ5]	|	0.6572	6.5e-07	8.13e-06
WBGene00021872	clec-85	13.016	18.18	|		C-type LECtin [Source:UniProtKB/TrEMBL;Acc:U4PAM5]	|	0.65662	0.00167	0.00769
WBGene00012194	toe-4	38.674	54.286	|		Target Of ERK kinase MPK-1 [Source:UniProtKB/TrEMBL;Acc:Q9XUM8]	|	0.655924	2.78e-06	2.97e-05
WBGene00020933	W02D3.4	11.982	16.689	|			|	0.653845	0.000437	0.00247
WBGene00004860	sma-6	72.88	101.949	|		Serine/threonine-protein kinase sma-6 [Source:UniProtKB/Swiss-Prot;Acc:Q09488]	|	0.65344	4.9e-05	0.000375
WBGene00007191	lgc-20	344.028	479.657	|	nAChR type ligand gated ion channel. Cys-loop LGIC superfamily	Ligand-Gated ion Channel [Source:UniProtKB/TrEMBL;Acc:A0A2K5ATQ0]	|	0.653263	6.26e-10	1.42e-08
WBGene00005550	sri-38	221.807	312.237	|	Chemoreceptor;Chemoreceptor: Sri class	Serpentine Receptor, class I [Source:UniProtKB/TrEMBL;Acc:O16594]	|	0.65297	0.011	0.0364
WBGene00012718	dhhc-8	11.11	15.63	|		Palmitoyltransferase [Source:UniProtKB/TrEMBL;Acc:Q9U2K0]	|	0.652878	0.000136	0.000912
WBGene00008375	D1054.8	66.482	92.646	|			|	0.652339	0.00071	0.00377
WBGene00018869	rfip-1	445.238	622.143	|		Rab-11 Family Interacting-Protein [Source:UniProtKB/TrEMBL;Acc:Q95ZS6]	|	0.651987	3.44e-06	3.58e-05
WBGene00004373	rme-1	74	104.284	|		Receptor Mediated Endocytosis [Source:UniProtKB/TrEMBL;Acc:Q86S80]	|	0.651939	0.000748	0.00393
WBGene00011512	T05H10.8	23.22	32.583	|			|	0.651802	0.00569	0.0211
WBGene00002196	kin-10	111.025	154.239	|		Casein kinase II subunit beta [Source:UniProtKB/Swiss-Prot;Acc:P28548]	|	0.651654	5.07e-07	6.48e-06
WBGene00017676	F21F3.7	19.483	27.317	|			|	0.651393	0.0135	0.043
WBGene00002035	hum-1	34.188	48.406	|	Myosin motors	Heavy chain, Unconventional Myosin [Source:UniProtKB/TrEMBL;Acc:Q19901]	|	0.651277	0.00126	0.00605
WBGene00011036	edc-3	37.954	53.078	|		Yeast Enhancer of DeCapping homolog [Source:UniProtKB/TrEMBL;Acc:Q21740]	|	0.650886	1.48e-06	1.69e-05
WBGene00001747	gsp-1	86.954	121.52	|		Serine/threonine-protein phosphatase PP1-alpha [Source:UniProtKB/Swiss-Prot;Acc:Q27497]	|	0.650808	1.27e-10	3.19e-09
WBGene00003374	mlk-1	24.123	33.623	|		Mitogen-activated protein kinase kinase kinase mlk-1 [Source:UniProtKB/Swiss-Prot;Acc:A0A0K3AV08]	|	0.650645	4.56e-05	0.000352
WBGene00018736	F53B1.3	76.035	105.837	|			|	0.650598	0.00212	0.0094
WBGene00000906	daf-10	236.262	330.236	|	Sensory cilia transport;Sensory cilia transport: IFT-A	Intraflagellar transport protein 122 homolog [Source:UniProtKB/Swiss-Prot;Acc:G5EFW7]	|	0.650349	5.72e-05	0.000429
WBGene00015164	ykt-6	46.487	65.456	|	Synaptic release machinery;Synaptic release machinery: R-SNARE:VAMP/synaptobrevin	YKT6 (Yeast v-SNARE) homolog [Source:UniProtKB/TrEMBL;Acc:Q9TXZ9]	|	0.649816	0.000785	0.00409
WBGene00016124	dnc-4	11.005	15.374	|		DyNactin Complex component [Source:UniProtKB/TrEMBL;Acc:Q18194]	|	0.649772	0.000244	0.0015
WBGene00016313	set-4	11.415	15.907	|		Histone-lysine N-methyltransferase Suv4-20 [Source:UniProtKB/Swiss-Prot;Acc:Q09265]	|	0.649604	3.35e-05	0.000269
WBGene00011449	T04H1.2	31.066	43.802	|			|	0.64831	0.00327	0.0134
WBGene00011511	gpcp-2	32.05	44.54	|		Putative glycerophosphocholine phosphodiesterase GPCPD1 homolog 2 [Source:UniProtKB/Swiss-Prot;Acc:Q10003]	|	0.647634	1.48e-07	2.16e-06
WBGene00017240	calu-2	23.711	32.872	|	Calcium binding protein;Calcium binding protein: Others	CALUmenin (Calcium-binding protein) homolog [Source:UniProtKB/TrEMBL;Acc:Q9TYS8]	|	0.647131	0.000152	0.001
WBGene00014089	ZK822.1	38.39	53.856	|			|	0.647051	0.00295	0.0123
WBGene00000262	bra-1	15.047	20.837	|		BMP Receptor Associated protein family [Source:UniProtKB/TrEMBL;Acc:Q20741]	|	0.646886	0.00357	0.0144
WBGene00013803	snx-13	60.911	84.137	|	GPCR signalling;GPCR signalling: RGS family	Sorting NeXin [Source:UniProtKB/TrEMBL;Acc:Q9U2U6]	|	0.646581	6.7e-06	6.52e-05
WBGene00000812	csk-1	11.305	15.831	|		Tyrosine-protein kinase csk-1 [Source:UniProtKB/Swiss-Prot;Acc:G5ECJ6]	|	0.646366	0.00122	0.0059
WBGene00015012	bath-20	70.895	98.821	|		BTB and MATH domain containing [Source:UniProtKB/TrEMBL;Acc:H2KY61]	|	0.646301	0.000126	0.00085
WBGene00009667	F43G9.4	10.761	14.991	|			|	0.645958	0.00706	0.0253
WBGene00017045	atg-13	13.508	18.891	|		Autophagy-related protein 13 homolog [Source:UniProtKB/Swiss-Prot;Acc:P34379]	|	0.645641	0.00768	0.027
WBGene00007967	cyp-25A4	11.464	15.9	|		CYtochrome P450 family [Source:UniProtKB/TrEMBL;Acc:Q27479]	|	0.644748	0.000776	0.00405
WBGene00015404	nstp-4	15.603	21.676	|		Nucleotide Sugar TransPorter family [Source:UniProtKB/TrEMBL;Acc:O16658]	|	0.644747	3.02e-05	0.000246
WBGene00014096	ZK829.7	39.997	55.9	|			|	0.644736	8.43e-07	1.03e-05
WBGene00006833	unc-108	136.699	190.993	|			|	0.644499	0.00025	0.00152
WBGene00010872	M05B5.4	57.119	79.015	|			|	0.643846	4.67e-07	6.03e-06
WBGene00019434	nmtn-1	29.749	41.284	|		NeMiTiN (Neuronal enriched MAP interacting protein) homolog [Source:UniProtKB/TrEMBL;Acc:H2KZG7]	|	0.643835	6.43e-13	2.21e-11
WBGene00021732	Y49G5B.1	49.552	68.735	|			|	0.64313	8.33e-05	0.000595
WBGene00006785	unc-50	11.206	15.62	|			|	0.64311	0.000503	0.0028
WBGene00021644	Y47G6A.18	21.195	29.523	|			|	0.642551	0.000598	0.00326
WBGene00006801	unc-68	84.932	119.691	|			|	0.642315	0.0113	0.0371
WBGene00008184	C49A1.1	499.667	692.452	|			|	0.642179	5.21e-06	5.19e-05
WBGene00006963	xpa-1	26.593	37.299	|		XPA (Xeroderma pigmentosum comp grp A) related [Source:UniProtKB/TrEMBL;Acc:Q21302]	|	0.64196	0.00154	0.00714
WBGene00022776	perm-3	61.237	84.629	|		ER membrane protein complex subunit 4 [Source:UniProtKB/TrEMBL;Acc:Q9N4N3]	|	0.641157	1.87e-06	2.08e-05
WBGene00006523	tam-1	33.214	46.254	|		Tandem Array expression Modifier; Tandem-array-modifier protein [Source:UniProtKB/TrEMBL;Acc:G5ED20]	|	0.641005	2.8e-05	0.00023
WBGene00010697	uda-1	27.457	38.204	|		Nucleoside-diphosphatase uda-1 [Source:UniProtKB/Swiss-Prot;Acc:Q9XU84]	|	0.640918	1.79e-07	2.57e-06
WBGene00020694	dhhc-11	40.606	56.106	|		Palmitoyltransferase [Source:UniProtKB/TrEMBL;Acc:Q9N5D8]	|	0.64039	0.00915	0.0312
WBGene00003965	pdk-1	14.864	20.807	|		3-phosphoinositide-dependent protein kinase 1 [Source:UniProtKB/Swiss-Prot;Acc:Q9Y1J3]	|	0.640169	0.0025	0.0107
WBGene00006472	tag-123	16.229	22.337	|		Transmembrane 9 superfamily member [Source:UniProtKB/TrEMBL;Acc:O17388]	|	0.640159	0.000145	0.000961
WBGene00003221	mes-3	10.975	15.266	|		Polycomb protein mes-3 [Source:UniProtKB/Swiss-Prot;Acc:Q10665]	|	0.640002	0.00102	0.0051
WBGene00013554	Y75B8A.19	10.545	14.64	|			|	0.638524	0.000353	0.00205
WBGene00018797	ept-1	7.91	10.886	|		EthanolaminePhosphoTransferase 1 homolog [Source:UniProtKB/TrEMBL;Acc:O44732]	|	0.638506	0.0149	0.0464
WBGene00011326	T01D3.1	108.824	151.914	|			|	0.637831	0.000358	0.00208
WBGene00022614	ZC449.4	29.274	40.787	|			|	0.637275	0.00134	0.00637
WBGene00018364	dagl-2	41.606	57.602	|		DiAcylGlycerol Lipase homolog [Source:UniProtKB/TrEMBL;Acc:Q65ZK3]	|	0.636819	0.00254	0.0109
WBGene00008434	D2089.3	815.397	1121.04	|			|	0.636404	0.00302	0.0126
WBGene00003839	ocr-2	152.352	210.53	|	TRP channel;TRP channel: TRPV	Osm-9 and Capsaicin receptor-Related [Source:UniProtKB/TrEMBL;Acc:O61220]	|	0.636124	3.35e-11	9.19e-10
WBGene00008353	D1025.1	19.084	26.112	|			|	0.635953	0.00039	0.00224
WBGene00004109	stam-1	91.311	126.731	|		Signal transducing adapter molecule 1 [Source:UniProtKB/Swiss-Prot;Acc:O01498]	|	0.635931	1.72e-05	0.00015
WBGene00008311	rskn-2	50.455	70.386	|		Putative ribosomal protein S6 kinase alpha-2 [Source:UniProtKB/Swiss-Prot;Acc:Q18846]	|	0.634416	0.00165	0.0076
WBGene00004740	scd-2	57.249	79.31	|		ALK tyrosine kinase receptor homolog scd-2 [Source:UniProtKB/Swiss-Prot;Acc:O76411]	|	0.634107	1.33e-08	2.43e-07
WBGene00005476	srh-270	12.932	18.154	|	Chemoreceptor;Chemoreceptor: Srh class	Serpentine Receptor, class H [Source:UniProtKB/TrEMBL;Acc:O45162]	|	0.633763	0.0126	0.0406
WBGene00015866	C16E9.2	24.596	33.879	|			|	0.633694	3.85e-05	0.000304
WBGene00011279	asd-1	11.622	16.144	|		RNA-binding protein ASD-1 [Source:UniProtKB/TrEMBL;Acc:G5EEW7]	|	0.633588	0.0151	0.0469
WBGene00009976	swan-2	36.636	50.728	|		Seven WD repeats, AN11 family [Source:UniProtKB/TrEMBL;Acc:Q93759]	|	0.633458	1.64e-05	0.000144
WBGene00000421	ced-7	32.871	45.412	|		ABC transporter ced-7 [Source:UniProtKB/Swiss-Prot;Acc:P34358]	|	0.633181	5.94e-09	1.14e-07
WBGene00008055	cyp-34A3	27.403	37.811	|			|	0.632357	0.00309	0.0128
WBGene00010943	M176.4	16.163	22.174	|			|	0.632239	0.000338	0.00197
WBGene00010559	K04D7.6	1468.92	2023.76	|			|	0.631783	3.3e-05	0.000266
WBGene00009570	srz-65	142.368	196.036	|			|	0.631761	0.000578	0.00316
WBGene00007647	C17E4.10	18.03	24.968	|			|	0.631635	7.96e-05	0.000572
WBGene00011418	igdb-1	88.222	120.975	|	Extracellular Immunoglobulin;Extracellular Immunoglobulin: Ig domain proteins	Ig-like and fibronectin type-III domain-containing protein 1 [Source:UniProtKB/Swiss-Prot;Acc:O18016]	|	0.631602	0.000408	0.00233
WBGene00018037	chtl-1	38.225	52.825	|		Choline transporter-like protein 1 [Source:UniProtKB/Swiss-Prot;Acc:Q20026]	|	0.631359	3.7e-06	3.83e-05
WBGene00004046	plp-1	211.694	291.374	|		Pur alpha Like Protein [Source:UniProtKB/TrEMBL;Acc:Q94230]	|	0.630945	1.42e-06	1.63e-05
WBGene00008419	wdr-23	26.706	36.693	|		DDB1- and CUL4-associated factor 11 homolog [Source:UniProtKB/Swiss-Prot;Acc:P90794]	|	0.630891	0.0163	0.0499
WBGene00006537	tbb-2	782.149	1078.1	|		Tubulin beta-2 chain [Source:UniProtKB/Swiss-Prot;Acc:P52275]	|	0.63053	1.49e-06	1.7e-05
WBGene00002265	lec-2	1176.73	1616.23	|		Galectin [Source:UniProtKB/TrEMBL;Acc:Q20684]	|	0.62982	9.78e-08	1.49e-06
WBGene00017973	ift-81	228.715	315.504	|	Sensory cilia transport;Sensory cilia transport: IFT-B	IFT (Chlamydomonas IntraFlagellar Transport) homolog [Source:UniProtKB/TrEMBL;Acc:A8DYR7]	|	0.629434	2.34e-07	3.25e-06
WBGene00014075	dhhc-4	21.476	29.31	|		Zinc finger DHHC domain-containing protein 4 [Source:UniProtKB/Swiss-Prot;Acc:Q8I0G4]	|	0.629372	4.05e-05	0.000318
WBGene00010059	F54E4.3	19.771	27.079	|			|	0.629099	0.000385	0.00221
WBGene00000519	cku-70	21.373	29.451	|		Caenorhabditis KU [Source:UniProtKB/TrEMBL;Acc:Q9U2D2]	|	0.628701	0.000885	0.00452
WBGene00010408	mboa-2	16.56	22.94	|		O-acyltransferase [Source:UniProtKB/TrEMBL;Acc:F1LIN4]	|	0.627557	0.000864	0.00443
WBGene00010864	xbx-3	703.089	962.847	|		X-BoX promoter element regulated [Source:UniProtKB/TrEMBL;Acc:Q21511]	|	0.627217	4.56e-05	0.000352
WBGene00012333	sre-43	138.26	191.223	|	Chemoreceptor;Chemoreceptor: Sre class	Serpentine Receptor, class E (Epsilon) [Source:UniProtKB/TrEMBL;Acc:Q9XUJ9]	|	0.626869	0.0112	0.0369
WBGene00012369	W09G3.6	33.703	46.629	|			|	0.62545	0.00591	0.0218
WBGene00016469	C36B7.6	8.337	11.457	|			|	0.625216	0.000531	0.00293
WBGene00017237	pole-2	43.178	59.11	|		Probable DNA polymerase epsilon subunit 2 [Source:UniProtKB/Swiss-Prot;Acc:Q19196]	|	0.624209	6.6e-07	8.24e-06
WBGene00007690	sftd-3	18.305	25.015	|		Vesicle transport protein [Source:UniProtKB/TrEMBL;Acc:A0A2K5ATL4]	|	0.624136	0.00228	0.00997
WBGene00002099	ins-16	107.178	147.089	|	Neuropeptide;Neuropeptide: Insulin-related peptides	INSulin related [Source:UniProtKB/TrEMBL;Acc:Q7KX46]	|	0.624041	0.0158	0.0486
WBGene00004172	pqn-92	14.38	19.842	|		Prion-like-(Q/N-rich)-domain-bearing protein [Source:UniProtKB/TrEMBL;Acc:Q9XW82]	|	0.623745	0.000972	0.00489
WBGene00010840	M03C11.3	12.661	17.393	|			|	0.623599	2.65e-05	0.000218
WBGene00001025	dnj-7	18.573	25.231	|		DNaJ domain (Prokaryotic heat shock protein) [Source:UniProtKB/TrEMBL;Acc:P91189]	|	0.623408	0.000522	0.00289
WBGene00000294	cas-1	21.645	29.718	|		Adenylyl cyclase-associated protein [Source:UniProtKB/TrEMBL;Acc:H2L023]	|	0.622592	0.000478	0.00268
WBGene00002202	kin-19	104.318	143.095	|		Casein kinase I isoform alpha [Source:UniProtKB/Swiss-Prot;Acc:P42168]	|	0.622499	3.05e-05	0.000249
WBGene00000201	arx-3	45.645	62.197	|		Actin-related protein 2/3 complex subunit [Source:UniProtKB/TrEMBL;Acc:Q9U1R7]	|	0.622268	0.00266	0.0113
WBGene00008281	C53D6.4	12.917	17.708	|			|	0.62226	0.0123	0.0399
WBGene00004270	rab-6.2	41.559	56.94	|		Ras-related protein Rab-6.2 [Source:UniProtKB/Swiss-Prot;Acc:Q22782]	|	0.621968	3.17e-05	0.000257
WBGene00020437	stt-3	72.812	99.489	|		Dolichyl-diphosphooligosaccharide--protein glycosyltransferase subunit stt-3 [Source:UniProtKB/Swiss-Prot;Acc:P46975]	|	0.621893	8.46e-09	1.59e-07
WBGene00012907	cpt-1	21.67	29.793	|		Carnitine Palmitoyl Transferase [Source:UniProtKB/TrEMBL;Acc:Q9U2F2]	|	0.62088	0.00295	0.0123
WBGene00003209	mel-26	14.52	20.051	|		Protein maternal effect lethal 26 [Source:UniProtKB/Swiss-Prot;Acc:Q94420]	|	0.620693	0.0118	0.0384
WBGene00018008	vpr-1	45.762	62.755	|		Major sperm protein [Source:UniProtKB/TrEMBL;Acc:O44782]	|	0.620284	1.49e-05	0.000132
WBGene00019743	nhr-203	18.948	26.095	|		Nuclear Hormone Receptor family [Source:UniProtKB/TrEMBL;Acc:Q966H9]	|	0.620093	0.0043	0.0167
WBGene00021888	manf-1	59.38	81.076	|		Mesencephalic astrocyte-derived neurotrophic factor homolog [Source:UniProtKB/Swiss-Prot;Acc:Q9N3B0]	|	0.619404	0.000245	0.0015
WBGene00007862	kvs-2	35.303	48.053	|	Potassium Channel;Potassium Channel: Voltage-gated: Shab/K 4		|	0.619367	0.000182	0.00117
WBGene00017272	F08F8.7	22.982	31.329	|		Ribulose-phosphate 3-epimerase [Source:UniProtKB/TrEMBL;Acc:Q95ZW2]	|	0.619317	0.00387	0.0154
WBGene00007007	mak-2	18.873	25.876	|		MAP kinase-activated protein kinase mak-2 [Source:UniProtKB/Swiss-Prot;Acc:Q965G5]	|	0.619308	0.000855	0.0044
WBGene00001980	hmr-1	41.785	57.627	|	Cadherin	Cadherin-related hmr-1 [Source:UniProtKB/Swiss-Prot;Acc:Q967F4]	|	0.619206	0.00039	0.00224
WBGene00008800	F14E5.2	22.728	30.938	|		Golgi apparatus protein 1 homolog [Source:UniProtKB/Swiss-Prot;Acc:Q19459]	|	0.618814	8.33e-06	7.89e-05
WBGene00002986	lig-4	22.325	30.483	|		LIGase [Source:UniProtKB/TrEMBL;Acc:Q95YE6]	|	0.61876	0.000121	0.000819
WBGene00019902	R05G6.10	12.612	17.312	|			|	0.617933	0.000297	0.00176
WBGene00022678	sar-1	26.185	35.926	|		GTP-binding protein SAR1 [Source:UniProtKB/Swiss-Prot;Acc:Q23445]	|	0.617755	0.000393	0.00225
WBGene00013892	ZC434.4	8.117	11.008	|		Ribosomal RNA-processing protein 7 homolog [Source:UniProtKB/Swiss-Prot;Acc:Q23314]	|	0.617588	0.0149	0.0465
WBGene00000247	bec-1	43.398	59.555	|		Beclin homolog [Source:UniProtKB/Swiss-Prot;Acc:Q22592]	|	0.616751	0.00233	0.0101
WBGene00012341	catp-6	15.123	20.565	|		Probable cation-transporting ATPase W08D2.5 [Source:UniProtKB/Swiss-Prot;Acc:Q27533]	|	0.614071	0.000233	0.00144
WBGene00003143	max-1	18.603	25.488	|		Motor AXon guidance [Source:UniProtKB/TrEMBL;Acc:Q18420]	|	0.613531	0.00224	0.00981
WBGene00015938	anat-1	26.114	35.179	|	Neurotransmitter's metabolism;Neurotransmitter's metabolism: Biogenic amine synthesis	AANAT (Arylalkylamine N-AcetylTransferase) homolog [Source:UniProtKB/TrEMBL;Acc:G4S185]	|	0.613464	0.00109	0.00537
WBGene00019767	rpa-2	27.092	36.792	|		Replication Protein A homolog [Source:UniProtKB/TrEMBL;Acc:Q95Y97]	|	0.613182	4.98e-05	0.000379
WBGene00002076	imb-2	18.872	25.868	|		IMportin Beta family [Source:UniProtKB/TrEMBL;Acc:O62332]	|	0.612736	0.000653	0.0035
WBGene00005461	srh-255	110.165	149.799	|	Chemoreceptor;Chemoreceptor: Srh class	Serpentine Receptor, class H [Source:UniProtKB/TrEMBL;Acc:Q7YXB0]	|	0.611584	1.66e-05	0.000146
WBGene00021369	siah-1	10.219	13.83	|		E3 ubiquitin-protein ligase siah-1 [Source:UniProtKB/Swiss-Prot;Acc:Q965X6]	|	0.611081	0.00598	0.022
WBGene00020696	pygl-1	144.05	195.764	|		Alpha-1,4 glucan phosphorylase [Source:UniProtKB/TrEMBL;Acc:Q9N5U1]	|	0.610245	9.39e-07	1.13e-05
WBGene00004364	ric-4	147.228	200.071	|	Synaptic release machinery;Synaptic release machinery: Q-SNARE:Qb/c subtype	Synaptosomal-associated protein [Source:UniProtKB/TrEMBL;Acc:A5PEW5]	|	0.610053	2.26e-09	4.64e-08
WBGene00015368	srt-65	25.577	34.937	|	Chemoreceptor;Chemoreceptor: Srt class	Serpentine Receptor, class T [Source:UniProtKB/TrEMBL;Acc:O16505]	|	0.60973	0.0025	0.0107
WBGene00016935	ifta-1	130.57	177.965	|	Sensory cilia transport;Sensory cilia transport: IFT-A	IntraFlagellar Transport Associated [Source:UniProtKB/TrEMBL;Acc:Q18859]	|	0.609513	5.94e-07	7.47e-06
WBGene00021952	vha-19	51.373	69.319	|		Vacuolar H ATPase [Source:UniProtKB/TrEMBL;Acc:Q9TYW1]	|	0.609145	9.42e-05	0.00066
WBGene00005892	srx-1	61.221	83.487	|	Chemoreceptor;Chemoreceptor: Srx class	Serpentine Receptor, class X [Source:UniProtKB/TrEMBL;Acc:O45695]	|	0.609099	0.00259	0.0111
WBGene00008570	kcnl-2	60.685	82	|	Potassium Channel;Potassium Channel: Calcium-activated SK family	KCNN (Potassium K ChaNNel, calcium activated)-Like [Source:UniProtKB/TrEMBL;Acc:G5EDA9]	|	0.609066	1.2e-05	0.000109
WBGene00013009	fbxc-23	8.297	11.322	|		F-box C protein [Source:UniProtKB/TrEMBL;Acc:O18201]	|	0.608718	0.00872	0.0301
WBGene00189987	C18H7.12	187.4	254.665	|			|	0.60838	1.21e-05	0.00011
WBGene00010362	enu-3.1	41.933	56.412	|		ENhancer of Uncoordination [Source:UniProtKB/TrEMBL;Acc:O45607]	|	0.607517	0.000584	0.00319
WBGene00000532	clh-5	19.605	26.3	|	Chloride channel;Chloride channel: CLC-type	Chloride channel protein [Source:UniProtKB/TrEMBL;Acc:G5EGT4]	|	0.607408	0.000466	0.00262
WBGene00045419	lsy-12	21.151	28.732	|		Histone acetyltransferase [Source:UniProtKB/TrEMBL;Acc:L8E6K3]	|	0.607305	1.13e-07	1.69e-06
WBGene00010177	F57A8.1	27.185	36.611	|			|	0.606996	0.000774	0.00405
WBGene00008777	F13H10.6	114.62	156.289	|			|	0.6066	0.00885	0.0304
WBGene00022769	sorf-1	31.288	42.158	|		Suppressor of organelle fusion 1 [Source:UniProtKB/Swiss-Prot;Acc:Q23533]	|	0.605584	0.000124	0.00084
WBGene00004319	rbr-2	104.04	141.444	|		Lysine-specific demethylase rbr-2 [Source:UniProtKB/Swiss-Prot;Acc:Q23541]	|	0.605539	1.09e-07	1.64e-06
WBGene00003961	pct-1	56.962	77.597	|		Cyclin-dependent kinase 17 [Source:UniProtKB/Swiss-Prot;Acc:Q8I7M8]	|	0.605285	0.000177	0.00114
WBGene00006402	fut-3	32.156	43.419	|		Alpha-(1,3)-fucosyltransferase fut-3 [Source:UniProtKB/Swiss-Prot;Acc:G5EFP5]	|	0.605104	7.84e-08	1.22e-06
WBGene00020481	T13C2.6	37.215	50.762	|			|	0.604919	0.000432	0.00245
WBGene00001582	gfi-2	22.168	29.882	|		GEI-4 (Four) Interacting protein [Source:UniProtKB/TrEMBL;Acc:Q95ZS1]	|	0.604868	1.26e-06	1.47e-05
WBGene00007877	nfki-1	89.234	120.798	|		ANK repeat-containing protein nipk-1 [Source:UniProtKB/Swiss-Prot;Acc:G5EDE9]	|	0.604498	4.47e-07	5.82e-06
WBGene00001682	gpc-2	187.546	253.855	|	GPCR signalling;GPCR signalling: Gγ	G Protein, Gamma subunit; Heterotrimeric G protein gamma subunit 2 [Source:UniProtKB/TrEMBL;Acc:G5ECT6]	|	0.603744	0.000164	0.00107
WBGene00004344	rgs-1	29.553	40.168	|	GPCR signalling;GPCR signalling: RGS family	Regulator of G-protein signaling rgs-1 [Source:UniProtKB/Swiss-Prot;Acc:P34295]	|	0.603705	0.000332	0.00194
WBGene00014219	ZK1098.2	14.128	18.995	|			|	0.603565	0.001	0.00502
WBGene00020144	T01C8.3	776.204	1044.28	|			|	0.602641	8.97e-05	0.000633
WBGene00012897	pisy-1	64.627	86.418	|		CDP-diacylglycerol--inositol 3-phosphatidyltransferase [Source:UniProtKB/TrEMBL;Acc:Q9U2G1]	|	0.601469	0.00383	0.0153
WBGene00005077	src-1	12.407	16.88	|		Tyrosine protein-kinase src-1 [Source:UniProtKB/Swiss-Prot;Acc:G5EE56]	|	0.601055	0.00596	0.0219
WBGene00000147	aph-1	23.944	32.28	|		Gamma-secretase subunit aph-1 [Source:UniProtKB/Swiss-Prot;Acc:O45876]	|	0.60077	0.00868	0.03
WBGene00000221	atf-5	158.919	214.997	|		ATF (cAMP-dependent transcription factor) family [Source:UniProtKB/TrEMBL;Acc:Q22156]	|	0.600735	0.00369	0.0148
WBGene00001834	hda-1	25.146	34.011	|		Histone deacetylase 1 [Source:UniProtKB/Swiss-Prot;Acc:O17695]	|	0.598844	0.000693	0.0037
WBGene00001681	gpc-1	470.36	633.802	|	GPCR signalling;GPCR signalling: Gγ	Guanine nucleotide-binding protein subunit gamma [Source:UniProtKB/Swiss-Prot;Acc:P54406]	|	0.598792	1.38e-07	2.02e-06
WBGene00013448	Y66D12A.24	14.584	19.682	|			|	0.598697	0.00724	0.0258
WBGene00011565	nhr-272	43.097	58.678	|		Nuclear Hormone Receptor family [Source:UniProtKB/TrEMBL;Acc:Q22298]	|	0.598414	0.00975	0.0329
WBGene00004783	seu-1	20.293	27.264	|		Suppressor of Ectopic Unc-5 [Source:UniProtKB/TrEMBL;Acc:H2L0L8]	|	0.598404	0.00347	0.0141
WBGene00001558	gdi-1	443.676	600.545	|		Rab GDP dissociation inhibitor [Source:UniProtKB/TrEMBL;Acc:E9P8A8]	|	0.598278	0.000117	0.000799
WBGene00001516	gap-2	18.343	24.769	|		Ras GTPase-activating protein gap-2 [Source:UniProtKB/Swiss-Prot;Acc:Q8MLZ5]	|	0.597558	0.000194	0.00123
WBGene00013446	Y66D12A.21	41.015	54.853	|		TM2 domain-containing protein Y66D12A.21 [Source:UniProtKB/Swiss-Prot;Acc:Q95PJ8]	|	0.597434	0.00552	0.0206
WBGene00013232	faah-4	10.301	13.93	|		Fatty Acid Amide Hydrolase homolog [Source:UniProtKB/TrEMBL;Acc:Q9U217]	|	0.59696	0.000438	0.00248
WBGene00010075	F55A11.1	44.186	58.949	|	Calcium binding protein;Calcium binding protein: Others		|	0.595215	4.1e-05	0.000321
WBGene00020866	vps-24	106.163	142.415	|		Related to yeast Vacuolar Protein Sorting factor [Source:UniProtKB/TrEMBL;Acc:Q9GYK4]	|	0.59477	7.09e-08	1.11e-06
WBGene00022719	pdhk-2	10.961	14.78	|		Probable [pyruvate dehydrogenase (acetyl-transferring)] kinase, mitochondrial [Source:UniProtKB/Swiss-Prot;Acc:Q02332]	|	0.594569	0.0156	0.0481
WBGene00000248	ben-1	110.242	147.635	|		Tubulin beta chain [Source:UniProtKB/TrEMBL;Acc:Q18817]	|	0.594394	7.77e-06	7.44e-05
WBGene00001008	dlk-1	134.811	180.197	|		Mitogen-activated protein kinase kinase kinase dlk-1 [Source:UniProtKB/Swiss-Prot;Acc:O01700]	|	0.594268	4.57e-09	8.99e-08
WBGene00001117	dyf-1	190.367	255.272	|	Sensory cilia transport;Sensory cilia transport: IFT-B	Tetratricopeptide repeat protein 30 homolog [Source:UniProtKB/Swiss-Prot;Acc:Q8I7G4]	|	0.59321	5.53e-06	5.47e-05
WBGene00018131	F37A4.1	38.628	51.4	|			|	0.593171	6.36e-05	0.000471
WBGene00021312	szy-2	43.99	58.651	|		Suppressor of ZYg-1 [Source:UniProtKB/TrEMBL;Acc:Q9N537]	|	0.592815	0.000772	0.00404
WBGene00003612	nhr-13	7.727	10.33	|		Nuclear hormone receptor family member nhr-13 [Source:UniProtKB/Swiss-Prot;Acc:Q9N4Q7]	|	0.591455	0.00111	0.00543
WBGene00018285	smk-1	33.872	45.404	|		SMEK (Dictyostelium Suppressor of MEK null) homolog [Source:UniProtKB/TrEMBL;Acc:H2KYN7]	|	0.591347	7.49e-11	1.94e-09
WBGene00009136	lurp-3	315.57	423.772	|	Auxiliary subunit for:: nAChR LGIC	LU (Ly6 Urokinase plasminogen) domain Receptor-related Protein [Source:UniProtKB/TrEMBL;Acc:P91986]	|	0.59126	0.00012	0.000812
WBGene00019287	K01A12.3	22.82	30.553	|		Probable G-protein coupled receptor K01A12.3 [Source:UniProtKB/Swiss-Prot;Acc:Q10042]	|	0.590884	4.21e-06	4.27e-05
WBGene00016405	hecd-1	68.319	92.01	|		E3 ubiquitin-protein ligase hecd-1 [Source:UniProtKB/Swiss-Prot;Acc:V6CLA2]	|	0.590166	3.41e-06	3.55e-05
WBGene00005555	sri-43	343.337	458.977	|	Chemoreceptor;Chemoreceptor: Sri class	Serpentine Receptor, class I [Source:UniProtKB/TrEMBL;Acc:Q9TZE8]	|	0.589644	0.00159	0.00736
WBGene00005230	srh-4	40.425	54.128	|	Chemoreceptor;Chemoreceptor: Srh class	Serpentine Receptor, class H [Source:UniProtKB/TrEMBL;Acc:Q9N5I5]	|	0.589569	0.000185	0.00118
WBGene00012543	nkcc-1	16.198	21.519	|	SLC transporter;SLC transporter: SLC12: cation-chloride cotransporter family	Na-K-Cl Cotransporter homolog [Source:UniProtKB/TrEMBL;Acc:L8E912]	|	0.589433	0.00378	0.0151
WBGene00004128	pqn-41	68.275	91.301	|		Polyglutamine-repeat protein pqn-41 [Source:UniProtKB/Swiss-Prot;Acc:C7IVR4]	|	0.589159	0.00104	0.00515
WBGene00009161	cox-7C	95.43	128.017	|		Cytochrome OXidase assembly protein [Source:UniProtKB/TrEMBL;Acc:O18687]	|	0.588443	0.00164	0.00759
WBGene00020910	dgtr-1	110.254	146.922	|		DGAT (Acyl-CoA:DiacylGlycerol AcylTransferase) Related [Source:UniProtKB/TrEMBL;Acc:Q23067]	|	0.588203	5.48e-06	5.43e-05
WBGene00017885	dip-2	17.408	23.393	|		Disco-Interacting Protein 2 homolog [Source:UniProtKB/TrEMBL;Acc:A0A061AE78]	|	0.588027	1.64e-05	0.000144
WBGene00002071	ile-2	10.552	14.063	|		Intracellular LEctin [Source:UniProtKB/TrEMBL;Acc:Q22170]	|	0.587971	0.000938	0.00475
WBGene00013355	gck-3	9.39	12.497	|		Germinal center kinase 3 [Source:UniProtKB/Swiss-Prot;Acc:G5EEN4]	|	0.587814	0.011	0.0364
WBGene00019807	jamp-1	15.992	21.389	|		JAMP (JNK1-Associated Membrane Protein) homolog; Seven transmembrane protein [Source:UniProtKB/TrEMBL;Acc:G5EBX4]	|	0.587692	0.000785	0.00409
WBGene00022460	use-1	93.43	125.087	|	Synaptic release machinery;Synaptic release machinery: Q_SNARE:Qc subtype	Vesicle transport protein USE1 [Source:UniProtKB/Swiss-Prot;Acc:Q9N598]	|	0.58757	3.15e-05	0.000255
WBGene00001470	baz-2	36.277	48.384	|		Bromodomain Adjacent to Zinc finger domain, 2A/2B, homolog [Source:UniProtKB/TrEMBL;Acc:Q23590]	|	0.587435	3.64e-07	4.84e-06
WBGene00011304	mnk-1	210.523	282.983	|		MAP kinase-interacting serine/threonine-protein kinase mnk-1 [Source:UniProtKB/Swiss-Prot;Acc:Q8I113]	|	0.587325	0.000461	0.00259
WBGene00006768	unc-32	68.439	91.297	|		Probable V-type proton ATPase 116 kDa subunit a [Source:UniProtKB/Swiss-Prot;Acc:P30628]	|	0.587312	3.59e-16	1.83e-14
WBGene00008266	C53A5.6	11.798	15.736	|			|	0.587168	0.0143	0.0449
WBGene00015168	pdi-6	389.966	519.848	|		Protein disulfide-isomerase A6 homolog [Source:UniProtKB/Swiss-Prot;Acc:Q11067]	|	0.586545	3.35e-06	3.5e-05
WBGene00003153	mca-3	63.51	84.571	|		Calcium-transporting ATPase [Source:UniProtKB/TrEMBL;Acc:B7CED8]	|	0.586328	8.77e-07	1.07e-05
WBGene00011681	T10B10.4	101.789	136.219	|			|	0.586244	4.05e-05	0.000318
WBGene00021316	Y32H12A.8	28.689	38.763	|			|	0.585775	0.00761	0.0269
WBGene00000161	apa-2	176.9	234.661	|		AP-2 complex subunit alpha [Source:UniProtKB/TrEMBL;Acc:Q22601]	|	0.5856	0.000126	0.000849
WBGene00013168	arp-1	42.31	56.421	|		Actin-Related Proteins [Source:UniProtKB/TrEMBL;Acc:U4PR70]	|	0.584446	0.000867	0.00445
WBGene00004463	rpn-7	46.366	61.956	|		26S proteasome non-ATPase regulatory subunit 6 [Source:UniProtKB/Swiss-Prot;Acc:Q20585]	|	0.583609	0.00127	0.00607
WBGene00015287	osta-1	49.447	66.148	|		Organic solute transporter alpha-like protein 1 [Source:UniProtKB/Swiss-Prot;Acc:O17204]	|	0.58342	1.54e-05	0.000136
WBGene00021093	W08F4.3	76.781	101.578	|			|	0.582218	0.000394	0.00226
WBGene00022527	ZC132.9	226.509	300.933	|			|	0.582157	0.000114	0.000779
WBGene00001748	gsp-2	24.558	32.685	|		Serine/threonine-protein phosphatase PP1-beta [Source:UniProtKB/Swiss-Prot;Acc:P48727]	|	0.581577	0.00134	0.00639
WBGene00016562	C41D11.3	7.908	10.531	|			|	0.581528	0.00871	0.03
WBGene00021394	Y38C1AA.1	35.08	46.367	|			|	0.581121	9.17e-05	0.000646
WBGene00009050	F22D6.2	224.684	299.851	|			|	0.580844	0.00191	0.00858
WBGene00017829	F26F4.9	40.847	54.075	|			|	0.580324	0.000818	0.00423
WBGene00012868	tbc-9	10.032	13.338	|		TBC (Tre-2/Bub2/Cdc16) domain family [Source:UniProtKB/TrEMBL;Acc:A0A061ACS9]	|	0.580064	3.61e-05	0.000287
WBGene00044020	ZK856.14	51.844	68.847	|			|	0.579017	3.69e-05	0.000293
WBGene00019546	glct-6	22.198	29.131	|		Galactosylgalactosylxylosylprotein 3-beta-glucuronosyltransferase [Source:UniProtKB/TrEMBL;Acc:G4SN66]	|	0.578996	0.0113	0.0372
WBGene00001679	gpb-1	315.62	419.211	|	GPCR signalling;GPCR signalling: Gβ	Guanine nucleotide-binding protein subunit beta-1 [Source:UniProtKB/Swiss-Prot;Acc:P17343]	|	0.578778	0.00147	0.00687
WBGene00004055	pmk-1	32.278	43.072	|		Mitogen-activated protein kinase pmk-1 [Source:UniProtKB/Swiss-Prot;Acc:Q17446]	|	0.578418	0.000246	0.0015
WBGene00020131	gcy-28	36.3	48.133	|	Guanylyl cycalse;Guanylyl cycalse: Receptor-type GCY	Receptor-type guanylate cyclase gcy-28 [Source:UniProtKB/Swiss-Prot;Acc:Q86GV3]	|	0.577214	4.35e-09	8.57e-08
WBGene00001118	dyf-2	152.96	203.361	|	Sensory cilia transport;Sensory cilia transport: IFT-A	WD repeat-containing protein dyf-2 [Source:UniProtKB/Swiss-Prot;Acc:G5ECZ4]	|	0.577159	2.13e-06	2.33e-05
WBGene00012376	nduf-7	76.373	101.159	|		Probable NADH dehydrogenase [ubiquinone] iron-sulfur protein 7, mitochondrial [Source:UniProtKB/Swiss-Prot;Acc:Q94360]	|	0.576936	3.39e-07	4.53e-06
WBGene00000103	akt-2	13.804	18.227	|		Serine/threonine-protein kinase akt-2 [Source:UniProtKB/Swiss-Prot;Acc:Q9XTG7]	|	0.576886	0.00177	0.00806
WBGene00000843	cup-2	18.086	23.967	|		Derlin-1 [Source:UniProtKB/Swiss-Prot;Acc:Q93561]	|	0.576827	0.00258	0.011
WBGene00010942	chch-3	24.105	32.02	|		MICOS complex subunit MIC19 [Source:UniProtKB/Swiss-Prot;Acc:Q21551]	|	0.576668	0.00695	0.025
WBGene00019385	irld-41	55.74	74.152	|			|	0.576505	2.89e-05	0.000236
WBGene00010785	top-2	32.811	43.515	|		DNA topoisomerase 2 top-2 [Source:UniProtKB/Swiss-Prot;Acc:Q23670]	|	0.576057	1.17e-07	1.75e-06
WBGene00004336	ret-1	81.65	108.81	|		Reticulon-like protein [Source:UniProtKB/TrEMBL;Acc:G5ECZ2]	|	0.575768	5.95e-05	0.000444
WBGene00022580	iglr-2	36.647	48.235	|	Leucine Rich Repeat (LRR) domain containing protein;Leucine Rich Repeat (LRR) domain containing protein: Ig + LRR proteins	Immunoglobulin domain and leucine-rich repeat-containing protein 2 [Source:UniProtKB/Swiss-Prot;Acc:P34595]	|	0.575424	2.67e-05	0.00022
WBGene00006462	svh-5	50.755	66.842	|			|	0.57533	9.53e-05	0.000666
WBGene00016968	epg-5	7.916	10.583	|		Ectopic P granules protein 5 [Source:UniProtKB/Swiss-Prot;Acc:Q18892]	|	0.575262	0.00266	0.0113
WBGene00020738	T23F2.5	272.546	361.583	|		UPF0057 membrane protein T23F2.5 [Source:UniProtKB/Swiss-Prot;Acc:Q22702]	|	0.574693	7.49e-05	0.000543
WBGene00020781	T24H7.2	62.27	82.186	|			|	0.574409	2.17e-05	0.000184
WBGene00015237	B0511.12	20.835	27.482	|			|	0.57417	0.000131	0.000878
WBGene00002074	ima-3	28.65	38.156	|		Importin subunit alpha-3 [Source:UniProtKB/Swiss-Prot;Acc:Q19969]	|	0.574048	0.00051	0.00283
WBGene00011474	aldo-1	905.217	1195.48	|		Fructose-bisphosphate aldolase 1 [Source:UniProtKB/Swiss-Prot;Acc:P54216]	|	0.573893	8.49e-05	0.000605
WBGene00022240	shl-1	57.703	76.154	|	Potassium Channel;Potassium Channel: Voltage-gated: Shal/K 4	SHaL family of potassium channels [Source:UniProtKB/TrEMBL;Acc:Q95XD1]	|	0.573638	2.97e-06	3.14e-05
WBGene00002175	jac-1	15.405	20.307	|		Juxtamembrane domain-associated catenin [Source:UniProtKB/Swiss-Prot;Acc:Q9U308]	|	0.573526	0.000336	0.00196
WBGene00000962	dhc-1	69.729	93.29	|	Dynein motors;Dynein motors: Heavy chain	Dynein heavy chain, cytoplasmic [Source:UniProtKB/Swiss-Prot;Acc:Q19020]	|	0.573059	0.00327	0.0134
WBGene00003883	osm-1	155.416	205.922	|	Sensory cilia transport;Sensory cilia transport: IFT-B	Intraflagellar transport protein osm-1 [Source:UniProtKB/Swiss-Prot;Acc:Q22830]	|	0.572461	7.39e-06	7.12e-05
WBGene00001538	gcy-12	42.966	56.783	|	Guanylyl cycalse;Guanylyl cycalse: Receptor-type GCY	Receptor-type guanylate cyclase gcy-12 [Source:UniProtKB/Swiss-Prot;Acc:Q19187]	|	0.572258	1.35e-05	0.000121
WBGene00003519	nac-3	49.362	65.221	|		Sodium-dependent high-affinity dicarboxylate transporter 3 [Source:UniProtKB/Swiss-Prot;Acc:Q21339]	|	0.571321	0.000169	0.00109
WBGene00009674	nucb-1	24.317	32.067	|	Calcium binding protein;Calcium binding protein: Others	NUCleoBindin homolog [Source:UniProtKB/TrEMBL;Acc:Q8MQ51]	|	0.571112	0.000845	0.00436
WBGene00009974	F53C11.4	26.139	34.607	|			|	0.570736	2.34e-06	2.53e-05
WBGene00017480	nstp-2	11.269	14.929	|		Nucleotide Sugar TransPorter family [Source:UniProtKB/TrEMBL;Acc:O44166]	|	0.570545	0.00914	0.0312
WBGene00006648	ttb-1	25.345	33.251	|		Transcription initiation factor IIB [Source:UniProtKB/Swiss-Prot;Acc:O16991]	|	0.569779	0.0011	0.00541
WBGene00010475	K01F9.2	10.532	14	|			|	0.569594	0.00678	0.0244
WBGene00077771	C41G7.9	32.794	43.255	|			|	0.569528	0.00127	0.0061
WBGene00000289	cam-1	27.157	35.728	|	Extracellular Immunoglobulin;Extracellular Immunoglobulin: Ig domain proteins	Tyrosine-protein kinase receptor cam-1 [Source:UniProtKB/Swiss-Prot;Acc:G5EGK5]	|	0.569441	3.66e-06	3.79e-05
WBGene00001560	gei-3	42.781	56.745	|		GEX Interacting protein [Source:UniProtKB/TrEMBL;Acc:Q0G834]	|	0.569381	4.37e-06	4.42e-05
WBGene00017490	pud-2.1	56.389	75.146	|		Protein Up-regulated in Daf-2(Gf) [Source:UniProtKB/TrEMBL;Acc:G5EBF3]	|	0.569129	0.016	0.0491
WBGene00000244	bbs-8	327.922	432.092	|	Sensory cilia transport;Sensory cilia transport: BBSome	Tetratricopeptide repeat protein 8 [Source:UniProtKB/Swiss-Prot;Acc:Q23049]	|	0.568947	3.68e-05	0.000293
WBGene00008214	gem-1	61.503	80.709	|		Gon-2 Extragenic Modifier [Source:UniProtKB/TrEMBL;Acc:Q18712]	|	0.568692	3.58e-05	0.000285
WBGene00018042	mks-3	32.927	43.395	|		MecKel-Gruber Syndrome (MKS) homolog [Source:UniProtKB/TrEMBL;Acc:Q20046]	|	0.568254	5.45e-08	8.8e-07
WBGene00003040	lin-59	44.248	58.547	|		Probable histone-lysine N-methyltransferase lin-59 [Source:UniProtKB/Swiss-Prot;Acc:O44757]	|	0.568124	3.82e-06	3.93e-05
WBGene00001427	fkb-2	136.036	178.996	|		Peptidylprolyl isomerase [Source:UniProtKB/TrEMBL;Acc:Q9U2Q8]	|	0.567718	0.000151	0.000996
WBGene00020762	zer-1	52.363	69.502	|		Zyg eleven-related protein 1 [Source:UniProtKB/Swiss-Prot;Acc:Q2WF59]	|	0.567689	3.37e-05	0.00027
WBGene00006478	tag-131	12.604	16.475	|		Neuferricin homolog [Source:UniProtKB/Swiss-Prot;Acc:Q9XXA7]	|	0.567245	0.0159	0.0489
WBGene00004732	sax-7	126.408	165.851	|	Extracellular Immunoglobulin;Extracellular Immunoglobulin: Ig domain proteins	Sensory AXon guidance [Source:UniProtKB/TrEMBL;Acc:W6RTH3]	|	0.566975	1.73e-06	1.94e-05
WBGene00007593	C14H10.3	15.999	21.068	|			|	0.566265	0.00187	0.00844
WBGene00021111	W09C3.3	11.145	14.704	|			|	0.565715	0.0107	0.0357
WBGene00006061	stl-1	13.199	17.433	|	Auxiliary subunit for:: DEG/ENaC channels (and perhaps TRP)	STomatin-Like [Source:UniProtKB/TrEMBL;Acc:H2FLJ1]	|	0.565392	0.0146	0.0458
WBGene00003602	nhr-3	78.651	104.03	|		Nuclear hormone receptor family member nhr-3 [Source:UniProtKB/Swiss-Prot;Acc:Q9XTJ4]	|	0.565258	1.67e-05	0.000147
WBGene00008720	F12F6.1	22.494	29.607	|			|	0.564148	1.22e-05	0.000111
WBGene00007982	pxd-1	11.757	15.574	|		PleXin Domain containing [Source:UniProtKB/TrEMBL;Acc:Q18500]	|	0.564029	0.00896	0.0307
WBGene00018408	F44B9.5	11.156	14.466	|		Ancient ubiquitous protein 1 homolog [Source:UniProtKB/Swiss-Prot;Acc:P34426]	|	0.563677	0.0152	0.047
WBGene00021044	W05H7.1	33.973	44.697	|			|	0.563477	0.00211	0.00935
WBGene00022824	ZK813.5	102.951	135.496	|	Neuropeptide receptors		|	0.563264	0.00172	0.00788
WBGene00018988	F56F11.1	43.31	57.303	|			|	0.562986	0.0148	0.0463
WBGene00007646	nkb-1	187.316	245.733	|		Sodium/potassium-transporting ATPase subunit beta-1 [Source:UniProtKB/Swiss-Prot;Acc:Q93235]	|	0.562916	1.41e-13	5.29e-12
WBGene00008402	wdfy-2	20.188	26.449	|		WD repeat and FYVE domain-containing protein 2 [Source:UniProtKB/Swiss-Prot;Acc:Q18964]	|	0.562703	9.05e-06	8.5e-05
WBGene00000068	acy-1	35.31	46.163	|		Adenylyl CYclase [Source:UniProtKB/TrEMBL;Acc:Q19523]	|	0.561809	6.36e-07	7.97e-06
WBGene00006713	ubc-18	58.119	76.163	|		UBiquitin Conjugating enzyme [Source:UniProtKB/TrEMBL;Acc:Q21633]	|	0.560943	0.00351	0.0142
WBGene00003850	odr-3	15.088	19.96	|	GPCR signalling;GPCR signalling: Gα	Guanine nucleotide-binding protein alpha-17 subunit [Source:UniProtKB/Swiss-Prot;Acc:Q18434]	|	0.560866	0.00634	0.0232
WBGene00017702	malt-1	8.027	10.435	|		MALT1 paracaspase homolog; Paracaspase [Source:UniProtKB/TrEMBL;Acc:G5EG87]	|	0.560201	0.00996	0.0335
WBGene00014016	ZK632.9	39.852	52.378	|			|	0.560019	0.00594	0.0219
WBGene00011270	R31.2	26.815	35.356	|			|	0.560005	0.000928	0.00471
WBGene00014164	lact-2	26.032	34.13	|		Beta-lactamase domain-containing protein 2 [Source:UniProtKB/Swiss-Prot;Acc:Q09621]	|	0.559656	0.00326	0.0134
WBGene00017775	F25B5.3	109.647	143.756	|		Putative cytosolic 5'-nucleotidase 3 [Source:UniProtKB/Swiss-Prot;Acc:Q09315]	|	0.55943	3.1e-07	4.15e-06
WBGene00004347	rgs-4	89.077	117.21	|	GPCR signalling;GPCR signalling: RGS family	Regulator of G protein Signaling [Source:UniProtKB/TrEMBL;Acc:H2KMK7]	|	0.559308	9.21e-05	0.000648
WBGene00003901	paa-1	119.963	157.982	|		Probable serine/threonine-protein phosphatase PP2A regulatory subunit [Source:UniProtKB/Swiss-Prot;Acc:Q09543]	|	0.558808	3.43e-05	0.000274
WBGene00000898	daf-2	35.506	47.052	|	Insulin/EGF receptor-like;Insulin/EGF receptor-like: transmembrane or membrane associated	Insulin-like receptor Insulin-like receptor subunit alpha Insulin-like receptor subunit beta [Source:UniProtKB/Swiss-Prot;Acc:Q968Y9]	|	0.557461	0.0102	0.0344
WBGene00012366	maea-1	19.894	26.002	|		MAEA (MAcrophage Erythroblast Attacher protein) homolog [Source:UniProtKB/TrEMBL;Acc:O18188]	|	0.557196	0.00137	0.00648
WBGene00018564	F47D12.9	35.795	46.759	|		Uncharacterized WD repeat-containing protein F47D12.9 [Source:UniProtKB/Swiss-Prot;Acc:Q09392]	|	0.556148	0.00303	0.0126
WBGene00006064	sto-2	23.67	30.759	|	Auxiliary subunit for:: DEG/ENaC channels (and perhaps TRP)	Stomatin-2 [Source:UniProtKB/Swiss-Prot;Acc:Q19958]	|	0.555814	2.17e-05	0.000184
WBGene00003903	pab-2	315.72	412.378	|		Polyadenylate-binding protein [Source:UniProtKB/TrEMBL;Acc:Q19579]	|	0.5554	1.97e-05	0.000169
WBGene00010725	erv-46	17.892	23.443	|		Yeast ERV (ER to Golgi transport Vesicle protein) homolog [Source:UniProtKB/TrEMBL;Acc:Q93878]	|	0.555387	0.000854	0.00439
WBGene00004729	sax-3	31.221	40.835	|	Extracellular Immunoglobulin;Extracellular Immunoglobulin: Ig domain proteins		|	0.554959	0.00118	0.00575
WBGene00004075	pod-1	26.129	34.255	|		POD-1 [Source:UniProtKB/TrEMBL;Acc:G5EDS2]	|	0.554125	0.000326	0.00191
WBGene00021507	Y41D4A.5	8.135	10.688	|		Tyrosine-protein phosphatase [Source:UniProtKB/TrEMBL;Acc:Q95Y26]	|	0.553798	0.0123	0.0397
WBGene00001426	fkb-1	58.513	76.082	|		Peptidylprolyl isomerase [Source:UniProtKB/TrEMBL;Acc:Q20107]	|	0.553583	1.83e-05	0.000159
WBGene00044989	Y37A1B.17	29.347	38.322	|			|	0.553112	1.61e-10	3.97e-09
WBGene00002187	kgb-1	14.426	18.849	|		GLH-binding kinase 1 [Source:UniProtKB/Swiss-Prot;Acc:O44408]	|	0.552023	0.000854	0.00439
WBGene00002004	hsf-1	12.052	15.755	|		Heat Shock Factor; Heat shock transcription factor 1 [Source:UniProtKB/TrEMBL;Acc:G5EFT5]	|	0.550764	0.000808	0.00419
WBGene00015344	nra-4	37.583	48.739	|		Nicotinic Receptor Associated [Source:UniProtKB/TrEMBL;Acc:H2KYE0]	|	0.550613	1.83e-05	0.000159
WBGene00017150	EGAP5.1	116.841	152.386	|			|	0.550445	0.0139	0.0438
WBGene00001594	glc-4	16.016	20.615	|	Ligand-gated ion channel;Ligand-gated ion channel: GluCl subgroup	Glutamate-gated ChLoride channel [Source:UniProtKB/TrEMBL;Acc:Q95QT7]	|	0.550391	0.00323	0.0133
WBGene00002223	klp-12	74.165	96.249	|	Kinesin;Kinesin: Family:Kinesin-4;Kinesin: Function:Chromosome positioning	Kinesin-Like Protein [Source:UniProtKB/TrEMBL;Acc:B3GWD7]	|	0.549881	0.00103	0.00512
WBGene00016831	sre-56	32.468	42.269	|	Chemoreceptor;Chemoreceptor: Sre class	Serpentine Receptor, class E (Epsilon) [Source:UniProtKB/TrEMBL;Acc:A3QMA6]	|	0.549717	0.00528	0.0198
WBGene00012853	Y44A6D.2	1274.07	1655.12	|			|	0.549679	0.00172	0.00785
WBGene00004378	rme-8	25.928	33.965	|		Endocytosis protein RME-8; Receptor Mediated Endocytosis [Source:UniProtKB/TrEMBL;Acc:G5ED36]	|	0.549674	0.000288	0.00172
WBGene00000095	aha-1	16.265	21.225	|		Aryl hydrocarbon receptor nuclear translocator homolog [Source:UniProtKB/Swiss-Prot;Acc:O02219]	|	0.546978	3.07e-06	3.24e-05
WBGene00022831	cec-10	14.306	18.488	|		C.Elegans Chromodomain protein [Source:UniProtKB/TrEMBL;Acc:Q9N4L7]	|	0.546609	0.00356	0.0144
WBGene00004220	ptr-5	53.722	69.822	|		PaTched Related family [Source:UniProtKB/TrEMBL;Acc:P91184]	|	0.546564	5.36e-05	0.000405
WBGene00000374	cyp-31A1	50.276	65.359	|			|	0.546048	0.000155	0.00101
WBGene00019188	H11E01.3	122.591	160.029	|			|	0.545872	0.000229	0.00142
WBGene00006617	tars-1	48.973	63.634	|		Threonine--tRNA ligase, cytoplasmic [Source:UniProtKB/Swiss-Prot;Acc:P52709]	|	0.545354	1.15e-05	0.000105
WBGene00004381	rnf-5	51.899	67.387	|		E3 ubiquitin ligase rnf-5 [Source:UniProtKB/Swiss-Prot;Acc:Q09463]	|	0.544909	0.000262	0.00159
WBGene00008764	dylt-1	29.398	38.322	|	Dynein motors;Dynein motors: Light chain (Tctex1-type)	DYnein Light chain (Tctex type) [Source:UniProtKB/TrEMBL;Acc:Q19416]	|	0.544862	0.0114	0.0373
WBGene00012386	agef-1	21.449	27.805	|		Arf-1 Guanine nucleotide Exchange Factor homolog [Source:UniProtKB/TrEMBL;Acc:G5EFH7]	|	0.544231	2.44e-07	3.37e-06
WBGene00003952	pbs-6	49.112	63.82	|		Proteasome subunit beta type-1 [Source:UniProtKB/Swiss-Prot;Acc:P34286]	|	0.544102	2.26e-05	0.000191
WBGene00004089	ppk-3	12.831	16.636	|		PIP Kinase [Source:UniProtKB/TrEMBL;Acc:G5ED98]	|	0.543059	2.43e-05	0.000203
WBGene00002783	let-607	139.077	180.463	|			|	0.543013	8.54e-07	1.04e-05
WBGene00016321	tppp-1	247.384	320.613	|		Tubulin polymerization-promoting protein homolog [Source:UniProtKB/Swiss-Prot;Acc:P91127]	|	0.542524	0.000657	0.00353
WBGene00000443	ceh-20	31.491	40.605	|		Homeobox protein ceh-20 [Source:UniProtKB/Swiss-Prot;Acc:P41779]	|	0.541497	0.00116	0.00565
WBGene00011884	enol-1	382.903	495.615	|		Enolase [Source:UniProtKB/Swiss-Prot;Acc:Q27527]	|	0.541073	0.000123	0.000832
WBGene00007761	rad-26	19.467	25.254	|			|	0.539635	0.000786	0.00409
WBGene00001178	egl-9	33.503	43.709	|		Hypoxia-inducible factor prolyl hydroxylase [Source:UniProtKB/Swiss-Prot;Acc:G5EBV0]	|	0.539602	0.00762	0.0269
WBGene00017926	cox-6C	83.283	106.793	|		Cytochrome OXidase assembly protein [Source:UniProtKB/TrEMBL;Acc:O76367]	|	0.539353	0.00999	0.0336
WBGene00004056	pmk-2	53.767	69.666	|		Mitogen-activated protein kinase pmk-2 [Source:UniProtKB/Swiss-Prot;Acc:Q8MXI4]	|	0.53787	6.39e-05	0.000473
WBGene00006755	unc-16	67.737	87.292	|		JNK-interacting protein [Source:UniProtKB/Swiss-Prot;Acc:P34609]	|	0.537742	6.65e-06	6.49e-05
WBGene00010614	cri-1	20.601	26.615	|		Conserved Regulator of Innate immunity [Source:UniProtKB/TrEMBL;Acc:P90912]	|	0.537742	0.00692	0.0249
WBGene00015099	ggtb-1	134.731	174.12	|		Probable geranylgeranyl transferase type-2 subunit beta [Source:UniProtKB/Swiss-Prot;Acc:P41992]	|	0.537656	4.67e-06	4.7e-05
WBGene00206362	B0041.11	22.944	29.573	|			|	0.537195	0.00584	0.0216
WBGene00009445	F35G12.12	52.561	67.561	|			|	0.537042	1.67e-06	1.88e-05
WBGene00022522	ZC132.3	406.126	524.848	|			|	0.53687	0.00388	0.0154
WBGene00008686	F11A10.5	42.611	54.575	|			|	0.536581	0.000958	0.00483
WBGene00006812	unc-80	34.913	45.355	|	Auxiliary subunit for:: Voltage-gated calcium channels		|	0.53645	0.00744	0.0264
WBGene00022250	Y73B6BL.29	41.723	53.855	|		tRNA pseudouridine synthase [Source:UniProtKB/TrEMBL;Acc:V6CKE5]	|	0.536292	0.00397	0.0157
WBGene00009547	F38H4.3	50.64	65.497	|			|	0.536115	0.000175	0.00113
WBGene00006708	ubc-13	36.32	46.912	|		Ubiquitin-conjugating enzyme E2 13 [Source:UniProtKB/Swiss-Prot;Acc:Q95XX0]	|	0.53429	0.0134	0.0425
WBGene00021237	crtc-1	37.307	48.211	|		CREB-regulated transcription coactivator 1 homolog [Source:UniProtKB/Swiss-Prot;Acc:Q95XA8]	|	0.53409	0.0015	0.00702
WBGene00006460	ppm-1.A	62.348	80.541	|		Protein phosphatase ppm-1 [Source:UniProtKB/Swiss-Prot;Acc:Q19775]	|	0.533618	0.00109	0.00535
WBGene00006483	dgk-4	28.315	36.606	|		Diacylglycerol kinase [Source:UniProtKB/TrEMBL;Acc:H2KZC9]	|	0.533505	0.000149	0.000979
WBGene00001026	dnj-8	32.202	41.357	|		DNaJ domain (Prokaryotic heat shock protein) [Source:UniProtKB/TrEMBL;Acc:B2MZA7]	|	0.533363	0.000141	0.000937
WBGene00015922	C17H11.2	8.669	11.18	|			|	0.532918	0.00427	0.0166
WBGene00000148	aph-2	15.086	19.359	|		Nicastrin [Source:UniProtKB/Swiss-Prot;Acc:Q23316]	|	0.532844	0.00036	0.00209
WBGene00006727	ubq-1	408.662	527.737	|		Polyubiquitin-A Ubiquitin Ubiquitin-related [Source:UniProtKB/Swiss-Prot;Acc:P0CG71]	|	0.532612	0.000328	0.00192
WBGene00000488	che-7	22.989	29.474	|		Innexin [Source:UniProtKB/TrEMBL;Acc:A0A131MBQ3]	|	0.532428	0.00207	0.00922
WBGene00011069	ceh-62	49.415	63.716	|		Homeobox protein ceh-62 [Source:UniProtKB/Swiss-Prot;Acc:Q09602]	|	0.532409	0.000312	0.00184
WBGene00018615	F48G7.4	31.755	41.211	|			|	0.531718	0.00763	0.0269
WBGene00016967	C56C10.11	19.821	25.638	|			|	0.53151	0.000906	0.00461
WBGene00022366	Y92H12BL.5	13.015	16.619	|			|	0.531288	0.00719	0.0257
WBGene00022502	ZC13.1	16.794	21.77	|			|	0.531076	0.00795	0.0278
WBGene00007696	tram-1	56.931	73.313	|		Translocating chain-associated membrane protein [Source:UniProtKB/TrEMBL;Acc:Q9XXK7]	|	0.530956	3.8e-05	0.000301
WBGene00022434	Y108G3AL.2	33.433	42.971	|			|	0.530912	0.000186	0.00119
WBGene00044045	R11G10.3	69.844	89.579	|			|	0.530454	0.00164	0.00757
WBGene00011747	sna-2	12.754	16.406	|		Small Nuclear RNA (snRNA) Associated protein [Source:UniProtKB/TrEMBL;Acc:Q94050]	|	0.530345	0.00813	0.0283
WBGene00017373	F10G7.10	26.219	33.825	|			|	0.529977	1.66e-05	0.000146
WBGene00017778	nono-1	60.454	77.662	|		NONO (Conserved nuclear protein, aka PSF) homolog [Source:UniProtKB/TrEMBL;Acc:B3GWA0]	|	0.529273	0.00025	0.00152
WBGene00004063	pmr-1	56.449	72.776	|		Calcium-transporting ATPase [Source:UniProtKB/TrEMBL;Acc:G5EFK9]	|	0.529235	0.00122	0.0059
WBGene00004363	ric-3	36.949	47.147	|		Resistance to inhibitors of cholinesterase protein 3 [Source:UniProtKB/Swiss-Prot;Acc:Q22472]	|	0.528469	0.000137	0.000914
WBGene00004343	rgr-1	13.119	16.905	|		Mediator of RNA polymerase II transcription subunit 14 [Source:UniProtKB/Swiss-Prot;Acc:Q03570]	|	0.528241	0.00191	0.00859
WBGene00009245	rict-1	11.876	15.245	|			|	0.528195	0.000146	0.000968
WBGene00003400	dapk-1	59.585	76.81	|		Death-associated protein kinase dapk-1 [Source:UniProtKB/Swiss-Prot;Acc:O44997]	|	0.528084	1.04e-05	9.66e-05
WBGene00019209	emc-1	30.953	39.546	|		EMC Endoplasmic Membrane protein Complex (Yeast EMC) homolog [Source:UniProtKB/TrEMBL;Acc:Q86S39]	|	0.527977	3.22e-05	0.000261
WBGene00004980	spk-1	18.941	24.286	|		Serine/threonine-protein kinase spk-1 [Source:UniProtKB/Swiss-Prot;Acc:Q03563]	|	0.526639	0.000798	0.00415
WBGene00000484	che-2	136.924	175.389	|	Sensory cilia transport;Sensory cilia transport: IFT-B	CHE-2 protein [Source:UniProtKB/TrEMBL;Acc:G5EGF0]	|	0.526082	6.54e-05	0.000482
WBGene00011970	rlbp-1	10.55	13.484	|		RaL Binding Protein [Source:UniProtKB/TrEMBL;Acc:Q9XVI0]	|	0.525848	0.00045	0.00254
WBGene00003838	ocr-1	13.231	16.908	|	TRP channel;TRP channel: TRPV	Osm-9 and Capsaicin receptor-Related [Source:UniProtKB/TrEMBL;Acc:G5EDR9]	|	0.525587	0.000255	0.00155
WBGene00003868	ooc-3	11.959	15.152	|			|	0.525495	0.0035	0.0142
WBGene00001843	hgo-1	20.794	26.632	|		Homogentisate 1,2-dioxygenase [Source:UniProtKB/Swiss-Prot;Acc:Q9Y041]	|	0.525398	0.0014	0.00661
WBGene00016195	erd-2.2	21.978	28.096	|		Putative ER lumen protein-retaining receptor C28H8.4 [Source:UniProtKB/Swiss-Prot;Acc:Q09473]	|	0.525345	0.0128	0.041
WBGene00004203	swsn-1	24.487	31.502	|		SWI/SNF nucleosome remodeling complex component; SWI3-like protein [Source:UniProtKB/TrEMBL;Acc:G5EF87]	|	0.525336	0.00139	0.00658
WBGene00021305	zig-11	40.059	51.388	|		2 (Zwei) IG domain protein [Source:UniProtKB/TrEMBL;Acc:Q9BPN5]	|	0.524811	0.00948	0.0322
WBGene00001649	gob-1	16.828	21.57	|		Trehalose-phosphatase [Source:UniProtKB/Swiss-Prot;Acc:Q9XTQ5]	|	0.524704	0.00173	0.00792
WBGene00004375	rme-4	67.446	85.625	|		Receptor Mediated Endocytosis [Source:UniProtKB/TrEMBL;Acc:G5ECW9]	|	0.524303	0.00186	0.00839
WBGene00014054	dbt-1	12.575	16.136	|		Lipoamide acyltransferase component of branched-chain alpha-keto acid dehydrogenase complex, mitochondrial [Source:UniProtKB/Swiss-Prot;Acc:Q23571]	|	0.524121	0.00752	0.0266
WBGene00004316	rbf-1	133.607	170.892	|	Synaptic release machinery;Synaptic release machinery: rabphilin	Rabphilin-1 [Source:UniProtKB/Swiss-Prot;Acc:P41885]	|	0.523931	5.52e-06	5.47e-05
WBGene00044134	D1025.10	29.12	37.101	|			|	0.523144	0.000161	0.00105
WBGene00002036	hum-2	33.345	42.579	|	Myosin motors	Heavy chain, Unconventional Myosin [Source:UniProtKB/TrEMBL;Acc:A0A168H5A5]	|	0.522919	0.00017	0.0011
WBGene00001949	hlh-2	131.771	167.972	|		Helix Loop Helix [Source:UniProtKB/TrEMBL;Acc:G5EEG9]	|	0.522834	0.00173	0.0079
WBGene00003885	osm-5	391.313	500.331	|	Sensory cilia transport;Sensory cilia transport: IFT-B	OSM-5 [Source:UniProtKB/TrEMBL;Acc:G5ED37]	|	0.522663	0.000243	0.00149
WBGene00012722	Y39G8B.1	51.879	66.432	|			|	0.522331	0.000695	0.0037
WBGene00003009	lin-23	35.533	45.79	|		F-box/WD repeat-containing protein lin-23 [Source:UniProtKB/Swiss-Prot;Acc:Q09990]	|	0.522306	0.00322	0.0133
WBGene00019673	K12C11.1	43.26	55.471	|			|	0.522157	3.42e-05	0.000273
WBGene00005554	sri-42	99.429	127.365	|	Chemoreceptor;Chemoreceptor: Sri class	Serpentine Receptor, class I [Source:UniProtKB/TrEMBL;Acc:Q9TZE9]	|	0.521963	0.00289	0.0121
WBGene00018214	F39H12.3	36.064	46.197	|			|	0.520694	0.00419	0.0163
WBGene00000193	arl-6	27.277	34.798	|	Sensory cilia transport;Sensory cilia transport: BBSome	ADP-ribosylation factor-like protein 6 [Source:UniProtKB/Swiss-Prot;Acc:Q18510]	|	0.52057	0.0079	0.0276
WBGene00012258	W04G3.5	32.005	40.655	|			|	0.520469	0.00209	0.00928
WBGene00000802	crt-1	460.01	585.993	|		Calreticulin [Source:UniProtKB/Swiss-Prot;Acc:P27798]	|	0.519488	9.99e-07	1.19e-05
WBGene00004681	rsd-2	25.01	31.863	|			|	0.5188	0.000138	0.000923
WBGene00015972	C18E3.3	36.051	46.238	|			|	0.518712	0.00123	0.00595
WBGene00000232	avr-14	13.03	16.63	|	Ligand-gated ion channel;Ligand-gated ion channel: GluCl subgroup ;Ligand-gated ion channel: Ligand: Glutamate		|	0.518449	0.000264	0.0016
WBGene00017066	maco-1	119.722	152.714	|		Macoilin [Source:UniProtKB/Swiss-Prot;Acc:P91193]	|	0.518297	2.41e-07	3.34e-06
WBGene00014204	ccdc-47	39.965	50.734	|		CCDC (Human Coiled Coil Domain Containing) homolog [Source:UniProtKB/TrEMBL;Acc:Q23382]	|	0.518058	1.95e-06	2.16e-05
WBGene00017735	did-2	86.682	111.01	|		Doa4-Independent Degradation, homologous to yeast Did2 [Source:UniProtKB/TrEMBL;Acc:Q9TXI3]	|	0.517735	0.00883	0.0303
WBGene00020231	T05A8.5	234.577	297.58	|			|	0.51638	0.000415	0.00236
WBGene00021733	otub-2	11.795	15.018	|		OTUBain deubiquitylating protease homolog [Source:UniProtKB/TrEMBL;Acc:Q9N4T5]	|	0.515287	0.00352	0.0142
WBGene00015687	chdp-1	385.257	491.576	|		Calponin Homology Domain containing Protein [Source:UniProtKB/TrEMBL;Acc:P91027]	|	0.515273	3.07e-05	0.000249
WBGene00000392	cdd-2	106.992	136.768	|		Cytidine deaminase [Source:UniProtKB/TrEMBL;Acc:Q20628]	|	0.514972	0.00282	0.0119
WBGene00000192	arl-8	89.254	113.623	|		ARF-Like; Novel small G protein indispensable for equal chromosome segregation [Source:UniProtKB/TrEMBL;Acc:G5EDC6]	|	0.51451	0.000648	0.00349
WBGene00013042	cccp-1	24.55	31.059	|		CCCP-1; Conserved Coiled-Coil Protein [Source:UniProtKB/TrEMBL;Acc:Q8I0Z1]	|	0.514431	5.65e-05	0.000425
WBGene00022647	ZK54.1	94.451	119.258	|	SLC transporter;SLC transporter: SLC17: Vesicular glutamate transporter family	SLC (SoLute Carrier) homolog [Source:UniProtKB/TrEMBL;Acc:Q23514]	|	0.513997	0.00299	0.0125
WBGene00003986	mct-4	25.805	32.728	|		MonoCarboxylate Transporter family [Source:UniProtKB/TrEMBL;Acc:H2L0E5]	|	0.513644	0.000216	0.00135
WBGene00017025	D1037.1	11.43	14.616	|			|	0.513633	0.00194	0.00868
WBGene00021554	Y45G5AL.1	15.048	19.093	|			|	0.513086	0.00645	0.0235
WBGene00015680	egal-1	22.01	28.02	|		Egalitarian protein homolog [Source:UniProtKB/Swiss-Prot;Acc:Q17902]	|	0.512932	0.0105	0.0351
WBGene00011032	ddx-52	16.29	20.703	|		DEAD boX helicase homolog [Source:UniProtKB/TrEMBL;Acc:Q21736]	|	0.512884	0.00848	0.0294
WBGene00007922	pph-6	18.964	24.078	|		Putative serine/threonine-protein phosphatase pph-6 [Source:UniProtKB/Swiss-Prot;Acc:Q09496]	|	0.512409	0.000399	0.00228
WBGene00011067	vps-11	8.119	10.36	|		Vacuolar protein sorting-associated protein 11 homolog [Source:UniProtKB/Swiss-Prot;Acc:Q09600]	|	0.511782	0.00245	0.0106
WBGene00004186	prpf-4	20.115	25.518	|		Vertebrate Pre-mRNA Processing Factor [Source:UniProtKB/TrEMBL;Acc:E3W737]	|	0.51171	0.00215	0.0095
WBGene00022623	ZC487.1	240.015	304.412	|			|	0.511425	2.65e-07	3.61e-06
WBGene00019938	R07E4.5	8.492	10.732	|			|	0.511159	0.0118	0.0386
WBGene00001137	eat-6	235.597	297.385	|		Sodium/potassium-transporting ATPase subunit alpha [Source:UniProtKB/TrEMBL;Acc:P90735]	|	0.511031	6.76e-07	8.42e-06
WBGene00005370	srh-154	261.939	335.148	|	Chemoreceptor;Chemoreceptor: Srh class	Serpentine Receptor, class H [Source:UniProtKB/TrEMBL;Acc:Q9XV76]	|	0.510503	0.0162	0.0496
WBGene00017506	F16B4.4	68.115	85.427	|			|	0.510202	0.0147	0.0459
WBGene00003185	mek-1	68.517	87.202	|		Dual specificity mitogen-activated protein kinase kinase mek-1 [Source:UniProtKB/Swiss-Prot;Acc:Q21307]	|	0.508831	0.0109	0.036
WBGene00003996	pgp-2	21.255	26.747	|		ABC transporter PGP-2; p-GlycoProtein related [Source:UniProtKB/TrEMBL;Acc:G5EDF9]	|	0.508586	0.00209	0.00927
WBGene00017063	mctp-1	14.38	18.257	|		Multiple C2 and Transmembrane region Protein family homolog [Source:UniProtKB/TrEMBL;Acc:H2KZJ6]	|	0.508156	0.000674	0.00361
WBGene00002007	hsp-3	145.068	183.21	|		Heat shock 70 kDa protein C [Source:UniProtKB/Swiss-Prot;Acc:P27420]	|	0.507567	2.59e-05	0.000215
WBGene00021771	spe-48	128.716	162.5	|			|	0.507149	7.42e-06	7.14e-05
WBGene00000224	atgp-1	44.621	56.278	|		Amino acid Transporter GlycoProtein subunit [Source:UniProtKB/TrEMBL;Acc:Q9XVU3]	|	0.506434	8.45e-07	1.03e-05
WBGene00019778	M57.2	46.213	58.642	|			|	0.506396	9.9e-05	0.000689
WBGene00006575	tir-1	18.624	23.45	|		Sterile alpha and TIR motif-containing protein tir-1 [Source:UniProtKB/Swiss-Prot;Acc:Q86DA5]	|	0.506061	0.00462	0.0177
WBGene00017285	F09E5.7	52.395	65.809	|			|	0.505981	1.93e-05	0.000166
WBGene00010631	cash-1	41.605	52.615	|		CKA And Striatin Homolog [Source:UniProtKB/TrEMBL;Acc:G5EE12]	|	0.504753	6.38e-05	0.000473
WBGene00011471	T05C12.8	91.709	116.576	|			|	0.50387	0.00557	0.0207
WBGene00008165	C47G2.4	48.89	61.543	|		LMBR1 domain-containing protein 2 homolog [Source:UniProtKB/Swiss-Prot;Acc:Q18695]	|	0.503507	0.000782	0.00408
WBGene00016616	C43H6.3	44.964	56.804	|			|	0.503365	0.00145	0.00681
WBGene00009120	F25H2.6	64.36	80.884	|			|	0.501667	0.000531	0.00293
WBGene00007736	igdb-2	31.577	40.029	|	Extracellular Immunoglobulin;Extracellular Immunoglobulin: Ig domain proteins	Ig-like and fibronectin type-III domain-containing protein 2 [Source:UniProtKB/Swiss-Prot;Acc:O18023]	|	0.501198	0.000965	0.00486
WBGene00021334	vps-4	50.742	63.936	|		Related to yeast Vacuolar Protein Sorting factor [Source:UniProtKB/TrEMBL;Acc:Q9BL83]	|	0.500973	1.12e-05	0.000103
WBGene00004767	sel-10	23.368	29.407	|		F-box/WD repeat-containing protein sel-10 [Source:UniProtKB/Swiss-Prot;Acc:Q93794]	|	0.500552	0.00181	0.00821
WBGene00016889	lst-6	16.5	20.922	|		Lateral Signaling Target [Source:UniProtKB/TrEMBL;Acc:Q18780]	|	0.499675	0.00103	0.00512
WBGene00015501	C06A5.3	9.929	12.521	|			|	0.498307	0.00241	0.0105
WBGene00011302	R166.2	10.503	13.107	|			|	0.497516	0.0105	0.035
WBGene00017217	F07F6.4	31.884	40.082	|			|	0.497448	1.59e-06	1.8e-05
WBGene00000182	arf-1.2	94.191	118.141	|		ADP-ribosylation factor 1-like 2 [Source:UniProtKB/Swiss-Prot;Acc:Q10943]	|	0.497059	0.000556	0.00305
WBGene00017273	gos-28	17.671	22.166	|	Synaptic release machinery;Synaptic release machinery: Q-SNARE:Qb subtype	Golgi SNAP receptor complex member 1 [Source:UniProtKB/Swiss-Prot;Acc:Q95ZW1]	|	0.497037	0.00763	0.0269
WBGene00000913	daf-18	8.201	10.344	|		Phosphatidylinositol 3,4,5-trisphosphate 3-phosphatase and dual-specificity protein phosphatase daf-18 [Source:UniProtKB/Swiss-Prot;Acc:G5EE01]	|	0.496491	0.00587	0.0217
WBGene00020825	tmem-231	101.379	127.26	|		TMEM (Human TransMEMbrane protein) homolog [Source:UniProtKB/TrEMBL;Acc:Q22804]	|	0.495667	0.00368	0.0148
WBGene00019353	K03B4.1	17.646	21.986	|			|	0.495179	0.00145	0.00681
WBGene00009508	row-1	18.776	23.497	|		Relative of Woc homolog [Source:UniProtKB/TrEMBL;Acc:A5JYT9]	|	0.494944	0.00153	0.00712
WBGene00004768	sel-11	35.453	44.487	|		E3 ubiquitin-protein ligase hrd-1 [Source:UniProtKB/Swiss-Prot;Acc:Q20798]	|	0.494715	5.44e-05	0.00041
WBGene00006959	xbp-1	1037.69	1303	|		X-box Binding Protein homolog; X-box binding protein unprocessed isoform [Source:UniProtKB/TrEMBL;Acc:G5EE07]	|	0.493908	0.00681	0.0245
WBGene00014023	lnkn-1	46.91	58.737	|			|	0.493775	3.45e-05	0.000275
WBGene00018208	F39G3.3	14.427	18.066	|			|	0.493759	0.00212	0.00937
WBGene00008745	F13E6.1	162.178	204.364	|			|	0.493545	0.00453	0.0175
WBGene00010506	K02E2.1	395.09	494.334	|			|	0.493267	2.65e-07	3.61e-06
WBGene00008857	timm-23	22.949	28.553	|		Translocase, Inner Mitochondrial Membrane [Source:UniProtKB/TrEMBL;Acc:Q9XVQ2]	|	0.492482	0.00759	0.0268
WBGene00020114	pde-4	221.375	277.96	|	Phosphodiesterase (PDE);Phosphodiesterase (PDE): cAMP-specific PDEs	Probable 3',5'-cyclic phosphodiesterase pde-4 [Source:UniProtKB/Swiss-Prot;Acc:Q22000]	|	0.492238	0.00244	0.0106
WBGene00021097	cdc-37	41.759	52.262	|		Probable Hsp90 co-chaperone cdc37 [Source:UniProtKB/Swiss-Prot;Acc:O02108]	|	0.492178	0.000441	0.00249
WBGene00001119	dyf-3	666.465	833.031	|	Sensory cilia transport;Sensory cilia transport: IFT-B	Clusterin-associated protein 1 homolog [Source:UniProtKB/Swiss-Prot;Acc:Q6I6D4]	|	0.492173	1.41e-07	2.06e-06
WBGene00009323	best-13	145.017	180.851	|	Chloride channel;Chloride channel: bestrophin-related	Bestrophin homolog 13 [Source:UniProtKB/Swiss-Prot;Acc:O45435]	|	0.49205	0.000171	0.0011
WBGene00014300	D2023.1	63.962	80.035	|			|	0.49189	0.00734	0.0261
WBGene00001088	dpy-30	32.88	41.252	|		Dosage compensation protein dpy-30 [Source:UniProtKB/Swiss-Prot;Acc:Q10661]	|	0.491669	0.0134	0.0427
WBGene00001017	dnc-1	26.551	33.194	|		DyNactin Complex component [Source:UniProtKB/TrEMBL;Acc:E2JKZ0]	|	0.491663	0.00197	0.00882
WBGene00000155	app-1	14.294	17.921	|		Xaa-Pro aminopeptidase app-1 [Source:UniProtKB/Swiss-Prot;Acc:O44750]	|	0.491375	0.00295	0.0123
WBGene00077761	zip-9	35.388	44.375	|		BZIP transcription factor family [Source:UniProtKB/TrEMBL;Acc:A0A1I6CMA8]	|	0.491273	0.00382	0.0152
WBGene00015418	pac-1	32.478	40.515	|		GTPase-activating protein pac-1 [Source:UniProtKB/Swiss-Prot;Acc:P34288]	|	0.490932	4.63e-05	0.000357
WBGene00010040	F54C8.7	28.402	35.532	|			|	0.490694	0.00689	0.0248
WBGene00003064	lpd-8	230.573	289.797	|		LiPid Depleted [Source:UniProtKB/TrEMBL;Acc:Q21915]	|	0.490538	0.00389	0.0154
WBGene00011720	T11G6.5	17.368	21.645	|			|	0.490504	0.000691	0.00368
WBGene00015561	C07A12.7	117.734	148.066	|			|	0.490228	0.0149	0.0465
WBGene00007976	C36B1.9	11.901	14.869	|			|	0.489211	0.00741	0.0263
WBGene00044406	F02A9.7	47.404	58.637	|			|	0.488913	0.0117	0.0383
WBGene00008283	C53D6.6	18.661	23.286	|			|	0.486928	0.00016	0.00104
WBGene00003423	msi-1	40.849	50.885	|		MuSashI (Fly neural) family; Neural RNA-binding protein MSI-1 [Source:UniProtKB/TrEMBL;Acc:G5EFS2]	|	0.485301	0.00273	0.0116
WBGene00021539	Y42H9AR.4	19.144	23.816	|			|	0.484787	0.000369	0.00213
WBGene00004266	rab-1	102.031	126.903	|		RAB family [Source:UniProtKB/TrEMBL;Acc:Q9UAQ6]	|	0.484393	0.000649	0.00349
WBGene00009825	F47G4.4	20.138	24.98	|			|	0.483827	0.00234	0.0102
WBGene00016642	chil-10	16.539	20.444	|		CHItinase-Like [Source:UniProtKB/TrEMBL;Acc:Q18607]	|	0.483578	0.00601	0.0221
WBGene00001122	dyf-6	192.249	239.132	|	Sensory cilia transport;Sensory cilia transport: IFT-B	Intraflagellar transport protein 46 homolog [Source:UniProtKB/Swiss-Prot;Acc:Q0G838]	|	0.483576	2.28e-08	3.99e-07
WBGene00000553	cmk-1	320.064	395.601	|		Calcium/calmodulin-dependent protein kinase type 1 [Source:UniProtKB/Swiss-Prot;Acc:Q9TXJ0]	|	0.483525	0.00166	0.00763
WBGene00013202	Y54E5A.7	44.956	55.637	|			|	0.482888	0.000229	0.00142
WBGene00003025	lin-40	70.76	87.772	|			|	0.480371	0.000134	0.000896
WBGene00011299	ikke-1	24.082	29.936	|		Inhibitor of nuclear factor kappa-B kinase epsilon subunit homolog 1 [Source:UniProtKB/Swiss-Prot;Acc:P32742]	|	0.47896	0.00189	0.00849
WBGene00012245	rbm-25	49.373	61.072	|		RNA Binding Motif protein homolog [Source:UniProtKB/TrEMBL;Acc:H2L2D0]	|	0.478888	0.000148	0.000976
WBGene00009587	mig-38	17.409	21.695	|		Abnormal cell migration protein 38 [Source:UniProtKB/Swiss-Prot;Acc:A6ZJ71]	|	0.478353	0.000629	0.0034
WBGene00004829	sli-1	12.242	15.219	|		Suppressor of LIneage defect [Source:UniProtKB/TrEMBL;Acc:Q95ZR5]	|	0.478037	0.00121	0.00587
WBGene00010756	K10G9.2	39.935	49.347	|			|	0.477893	0.00357	0.0144
WBGene00010239	F58B4.6	386.5	480.986	|			|	0.477844	0.00202	0.00902
WBGene00004501	rpt-1	54.014	66.872	|		26S proteasome regulatory subunit 7 [Source:UniProtKB/Swiss-Prot;Acc:Q18787]	|	0.477447	0.000922	0.00468
WBGene00005300	srh-79	99.824	124.102	|	Chemoreceptor;Chemoreceptor: Srh class	Serpentine Receptor, class H [Source:UniProtKB/TrEMBL;Acc:O76661]	|	0.47722	0.00209	0.00927
WBGene00020562	T19C3.4	12.087	14.865	|			|	0.474967	0.00515	0.0194
WBGene00013924	rad-23	57.838	71.619	|			|	0.474249	0.00272	0.0115
WBGene00002190	kin-2	96.192	118.993	|		cAMP-dependent protein kinase regulatory subunit [Source:UniProtKB/Swiss-Prot;Acc:P30625]	|	0.47423	0.00167	0.00769
WBGene00020507	vha-15	30.037	37.063	|		Probable V-type proton ATPase subunit H 2 [Source:UniProtKB/Swiss-Prot;Acc:Q22494]	|	0.473712	0.000392	0.00225
WBGene00016439	C35D10.1	53.594	65.663	|		ER membrane protein complex subunit 7 homolog [Source:UniProtKB/Swiss-Prot;Acc:Q8WQG1]	|	0.473508	0.00669	0.0242
WBGene00018764	F53F10.2	153.992	190.656	|			|	0.473438	0.00398	0.0157
WBGene00018117	nlp-47	83.831	103.955	|	Neuropeptide;Neuropeptide: Neuropeptide-like proteins	Neuropeptide-Like Protein [Source:UniProtKB/TrEMBL;Acc:O76722]	|	0.473037	0.00788	0.0276
WBGene00010009	F53H4.4	16.812	20.768	|			|	0.47292	0.0141	0.0444
WBGene00009216	F28D1.6	356.226	436.633	|			|	0.472886	0.00304	0.0126
WBGene00012730	xrn-1	23.786	29.521	|		5'-3' exoribonuclease 1 [Source:UniProtKB/TrEMBL;Acc:Q9BHK7]	|	0.472428	0.0056	0.0208
WBGene00003626	nhr-32	11.706	14.408	|		Nuclear Hormone Receptor family [Source:UniProtKB/TrEMBL;Acc:Q21372]	|	0.47159	0.00402	0.0158
WBGene00009696	F44F1.4	16.723	20.636	|			|	0.47145	0.0139	0.0441
WBGene00009082	dlat-1	46.523	57.212	|		Dihydrolipoyllysine-residue acetyltransferase component of pyruvate dehydrogenase complex, mitochondrial [Source:UniProtKB/Swiss-Prot;Acc:Q19749]	|	0.470636	0.000312	0.00184
WBGene00019664	K11H12.8	67.879	83.829	|			|	0.468969	0.00828	0.0288
WBGene00006363	syd-1	24.648	30.144	|	PDZ domain protein	Rho GTPase-activating protein syd-1 [Source:UniProtKB/Swiss-Prot;Acc:Q86NH1]	|	0.468678	0.00165	0.0076
WBGene00013378	emc-3	93.857	114.917	|		ER membrane protein complex subunit 3 [Source:UniProtKB/TrEMBL;Acc:Q9U1X6]	|	0.467973	0.000725	0.00383
WBGene00003636	nhr-46	51.399	63.218	|		Nuclear Hormone Receptor family [Source:UniProtKB/TrEMBL;Acc:H2KZB8]	|	0.467323	0.000237	0.00146
WBGene00016454	C35E7.2	63.134	77.864	|			|	0.466673	0.000754	0.00396
WBGene00006993	zyg-8	12.817	15.734	|		Serine/threonine-protein kinase zyg-8 [Source:UniProtKB/Swiss-Prot;Acc:Q95QC4]	|	0.465769	0.00473	0.0181
WBGene00003053	lmp-1	81.33	99.83	|		LAMP family protein lmp-1 [Source:UniProtKB/Swiss-Prot;Acc:Q11117]	|	0.465513	0.00166	0.00765
WBGene00000838	cul-3	40.953	50.019	|		Cullin-3 [Source:UniProtKB/Swiss-Prot;Acc:Q17391]	|	0.464849	0.00566	0.021
WBGene00004462	rpn-6.1	34.484	42.384	|		Probable 26S proteasome regulatory subunit rpn-6.1 [Source:UniProtKB/Swiss-Prot;Acc:Q20938]	|	0.464411	0.0102	0.0343
WBGene00001440	fkh-8	70.954	87.089	|		ForKHead transcription factor family [Source:UniProtKB/TrEMBL;Acc:H2KZ39]	|	0.464346	0.0023	0.01
WBGene00013020	Y48G10A.3	41.527	51.272	|			|	0.464255	0.00593	0.0218
WBGene00001171	egl-2	14.461	17.818	|	Potassium Channel;Potassium Channel: Eag-like/K 10-12 family		|	0.464078	0.00391	0.0155
WBGene00007824	dlat-2	30.155	36.838	|		DihydroLipoyllysine-residue AcetylTransferase [Source:UniProtKB/TrEMBL;Acc:O45279]	|	0.463544	0.00896	0.0307
WBGene00044698	K09F5.6	15.535	18.97	|			|	0.463444	0.00814	0.0284
WBGene00016641	C44C1.1	59.965	73.198	|			|	0.462987	0.000995	0.00499
WBGene00009888	F49E2.5	118.046	145.267	|			|	0.462629	1.06e-05	9.81e-05
WBGene00001709	grk-2	35.992	43.999	|	GPCR signalling;GPCR signalling: GRK ;GPCR signalling: RGS family	G protein-coupled receptor kinase 2 [Source:UniProtKB/Swiss-Prot;Acc:Q09639]	|	0.462557	2.88e-06	3.05e-05
WBGene00000591	coh-1	18.814	23.188	|		COHesin family [Source:UniProtKB/TrEMBL;Acc:A0A131MBD0]	|	0.461754	0.0112	0.0369
WBGene00013039	scav-3	11.344	13.892	|		SCAVenger receptor (CD36 family) related [Source:UniProtKB/TrEMBL;Acc:Q9XTT3]	|	0.461645	0.00122	0.00587
WBGene00006200	str-154	65.881	80.945	|		Seven TM Receptor [Source:UniProtKB/TrEMBL;Acc:A0A0M7RFG8]	|	0.461443	0.000459	0.00259
WBGene00010660	K08D8.6	220.311	269.357	|			|	0.460931	2.46e-05	0.000205
WBGene00011802	T16G1.9	12.426	15.142	|			|	0.46082	0.000341	0.00198
WBGene00022635	ZC581.9	96.838	119.222	|			|	0.460584	0.000276	0.00166
WBGene00005649	srp-8	21.598	26.404	|		SeRPin [Source:UniProtKB/TrEMBL;Acc:Q19651]	|	0.460573	0.00722	0.0258
WBGene00001041	dnj-23	130.773	160.38	|		DNaJ domain (Prokaryotic heat shock protein) [Source:UniProtKB/TrEMBL;Acc:Q22751]	|	0.460224	0.000799	0.00415
WBGene00015653	srz-78	131.092	160.642	|	Chemoreceptor;Chemoreceptor: Srz class	Serpentine Receptor, class Z [Source:UniProtKB/TrEMBL;Acc:O44459]	|	0.459537	0.00127	0.00607
WBGene00011827	T19A6.1	51.909	63.562	|			|	0.45903	0.000373	0.00215
WBGene00006531	tba-5	48.511	59.653	|		Tubulin alpha chain [Source:UniProtKB/TrEMBL;Acc:Q19490]	|	0.459011	0.0034	0.0139
WBGene00001241	elo-3	85.859	105.51	|		Putative fatty acid elongation protein 3 [Source:UniProtKB/Swiss-Prot;Acc:P49191]	|	0.458267	0.0139	0.044
WBGene00009882	vha-17	113.485	138.527	|		V-type proton ATPase subunit e [Source:UniProtKB/Swiss-Prot;Acc:Q20591]	|	0.458014	0.00098	0.00492
WBGene00009460	ubr-5	45.216	55.861	|		UBR E3 ubiquitin ligase homolog [Source:UniProtKB/TrEMBL;Acc:G5EDT9]	|	0.457962	0.00678	0.0244
WBGene00011507	T05H10.1	26.576	32.467	|		Ubiquitin carboxyl-terminal hydrolase [Source:UniProtKB/TrEMBL;Acc:Q22240]	|	0.456701	0.00013	0.000872
WBGene00006808	unc-76	288.875	350.781	|			|	0.456259	0.000257	0.00156
WBGene00019162	eif-1.A	91.955	112.26	|		Eukaryotic Initiation Factor [Source:UniProtKB/TrEMBL;Acc:Q9TXU7]	|	0.456079	0.000937	0.00474
WBGene00011392	sbt-1	6678.14	8121.86	|		Seven B Two (Mammalian 7BT prohormone convertase chaperone) homolog [Source:UniProtKB/TrEMBL;Acc:Q9XTY3]	|	0.455866	1.35e-05	0.000121
WBGene00000520	cku-80	23.033	27.912	|		ATP-dependent DNA helicase II subunit 2 [Source:UniProtKB/TrEMBL;Acc:Q21829]	|	0.454702	0.00248	0.0107
WBGene00015996	C18H7.6	1568.18	1904.11	|			|	0.452728	0.000267	0.00161
WBGene00006994	zyg-9	29.855	36.318	|		Zygote defective protein 9 [Source:UniProtKB/Swiss-Prot;Acc:G5EEM5]	|	0.452211	0.000966	0.00486
WBGene00010197	F57C2.5	40.199	48.446	|			|	0.451213	0.0145	0.0456
WBGene00003925	pas-4	51.22	62.242	|		Proteasome subunit alpha type-7 [Source:UniProtKB/Swiss-Prot;Acc:Q95005]	|	0.450005	0.0149	0.0464
WBGene00006697	uaf-1	39.484	47.879	|		Splicing factor U2AF 65 kDa subunit [Source:UniProtKB/Swiss-Prot;Acc:P90978]	|	0.449073	0.0162	0.0497
WBGene00012016	inpp-1	296.143	358.377	|		INositol Polyphosphate-5-Phosphatase [Source:UniProtKB/TrEMBL;Acc:G5EBY9]	|	0.448804	0.00146	0.00685
WBGene00021323	Y34B4A.7	20.592	24.855	|			|	0.448416	0.0114	0.0375
WBGene00017016	snap-1	31.268	37.845	|		SNAP (Soluble NSF Attachment Protein) homolog [Source:UniProtKB/TrEMBL;Acc:Q18921]	|	0.447591	0.00198	0.00885
WBGene00019120	npl-4.1	24.203	29.401	|		Nuclear protein localization protein 4 homolog 1 [Source:UniProtKB/Swiss-Prot;Acc:H2KYU6]	|	0.44748	0.00783	0.0275
WBGene00016902	C53D5.1	31.107	37.723	|			|	0.447282	0.0031	0.0129
WBGene00003966	pdl-1	45.982	55.884	|		Phosphodiesterase delta-like protein [Source:UniProtKB/Swiss-Prot;Acc:Q18268]	|	0.447078	0.00305	0.0127
WBGene00015861	C16D9.6	177.602	215.996	|		Glycoprotein-N-acetylgalactosamine 3-beta-galactosyltransferase 1 [Source:UniProtKB/TrEMBL;Acc:Q22900]	|	0.447052	0.00544	0.0203
WBGene00011638	ostb-1	109.917	131.939	|		Dolichyl-diphosphooligosaccharide--protein glycosyltransferase 48 kDa subunit [Source:UniProtKB/Swiss-Prot;Acc:P45971]	|	0.446528	0.00594	0.0219
WBGene00012468	Y17G7B.17	65.09	78.586	|			|	0.446323	0.000337	0.00197
WBGene00000566	cnt-2	30.909	37.462	|		Arf-GAP with ANK repeat and PH domain-containing protein cnt-2 [Source:UniProtKB/Swiss-Prot;Acc:Q9XX14]	|	0.445984	8.73e-06	8.23e-05
WBGene00009126	pyk-1	354.154	429.21	|		Pyruvate kinase [Source:UniProtKB/TrEMBL;Acc:Q7JL40]	|	0.445833	0.000736	0.00388
WBGene00001258	emb-4	34.596	41.918	|			|	0.445496	0.000994	0.00498
WBGene00010428	dcn-1	33.527	40.69	|		Defective in cullin neddylation protein 1 [Source:UniProtKB/Swiss-Prot;Acc:Q9U3C8]	|	0.444921	0.0112	0.037
WBGene00194909	F41E6.17	116.394	140.805	|			|	0.444772	0.00138	0.00654
WBGene00015734	copd-1	33.219	40.368	|		Probable coatomer subunit delta [Source:UniProtKB/Swiss-Prot;Acc:Q09236]	|	0.444209	0.00849	0.0294
WBGene00017546	rpa-1	46.484	56.162	|		Probable replication factor A 73 kDa subunit [Source:UniProtKB/Swiss-Prot;Acc:Q19537]	|	0.444131	5.65e-05	0.000424
WBGene00021461	nekl-1	144.982	175.626	|		NEK (NEver in mitosis Kinase) Like [Source:UniProtKB/TrEMBL;Acc:A0A061AD48]	|	0.444057	0.000591	0.00323
WBGene00010284	aman-2	16.744	20.036	|		Alpha-mannosidase [Source:UniProtKB/TrEMBL;Acc:Q2PJ74]	|	0.442051	0.0118	0.0385
WBGene00021807	Y53G8AM.7	167.051	201.995	|			|	0.441879	0.00121	0.00585
WBGene00001680	gpb-2	30.472	36.681	|	GPCR signalling;GPCR signalling: Gβ	Guanine nucleotide-binding protein subunit beta-2 [Source:UniProtKB/Swiss-Prot;Acc:Q20636]	|	0.439715	0.00161	0.00744
WBGene00001874	him-17	12.579	15.161	|		High Incidence of Males (Increased X chromosome loss) [Source:UniProtKB/TrEMBL;Acc:Q22360]	|	0.438065	0.00881	0.0303
WBGene00013538	ari-1.4	122.592	146.939	|		RBR-type E3 ubiquitin transferase [Source:UniProtKB/TrEMBL;Acc:D3NQB5]	|	0.438029	0.00894	0.0306
WBGene00013215	Y54G11A.4	38.356	46.212	|			|	0.437062	0.00216	0.00952
WBGene00004032	pkc-1	94.744	114.213	|		Protein kinase C-like 1B [Source:UniProtKB/Swiss-Prot;Acc:P34885]	|	0.437042	0.000318	0.00187
WBGene00011531	rsbp-1	36.471	43.894	|		R-Seven Binding Protein (R7BP) homolog [Source:UniProtKB/TrEMBL;Acc:Q9U379]	|	0.436431	0.00287	0.0121
WBGene00001994	hpk-1	120.074	144.594	|		Homeodomain-interacting protein kinase 1 [Source:UniProtKB/Swiss-Prot;Acc:Q8MQ70]	|	0.436086	5.39e-05	0.000407
WBGene00017782	F25E5.1	14.132	16.98	|			|	0.435585	0.00182	0.00825
WBGene00000985	dhs-22	46.444	55.736	|		DeHydrogenases, Short chain [Source:UniProtKB/TrEMBL;Acc:Q9XVS9]	|	0.435323	0.00253	0.0109
WBGene00008874	F15H10.7	20.192	24.188	|			|	0.434924	0.00852	0.0295
WBGene00000793	crh-1	81.633	98.349	|		CREB Homolog; Cyclic AMP-response element binding protein 1 beta [Source:UniProtKB/TrEMBL;Acc:G5ECG1]	|	0.434666	0.0032	0.0132
WBGene00001685	gpd-3	489.027	585.506	|		Glyceraldehyde-3-phosphate dehydrogenase 3 [Source:UniProtKB/Swiss-Prot;Acc:P17330]	|	0.434394	0.00085	0.00438
WBGene00001101	dsh-1	15.645	18.796	|	PDZ domain protein	DiSHevelled related [Source:UniProtKB/TrEMBL;Acc:A0A0K3AWU4]	|	0.434303	0.000244	0.0015
WBGene00022793	ZK686.3	97.872	117.223	|		Probable dolichyl-diphosphooligosaccharide--protein glycosyltransferase subunit 3 [Source:UniProtKB/Swiss-Prot;Acc:P34669]	|	0.434162	0.000308	0.00182
WBGene00008547	F07A11.4	25.695	30.838	|		Ubiquitin carboxyl-terminal hydrolase [Source:UniProtKB/TrEMBL;Acc:I2HA92]	|	0.433624	0.0132	0.0421
WBGene00001047	dnj-29	23.751	28.438	|		DNaJ domain (Prokaryotic heat shock protein) [Source:UniProtKB/TrEMBL;Acc:Q9U1W0]	|	0.433188	0.00535	0.02
WBGene00017744	fbxc-54	104.691	124.943	|		F-box C protein [Source:UniProtKB/TrEMBL;Acc:O17067]	|	0.432958	0.00269	0.0114
WBGene00022060	dmd-9	86.699	104.082	|		DM (Doublesex/MAB-3) Domain family [Source:UniProtKB/TrEMBL;Acc:Q95XU1]	|	0.4326	0.011	0.0364
WBGene00006805	unc-73	86.318	104.04	|		Guanine nucleotide exchange factor UNC-73B [Source:UniProtKB/TrEMBL;Acc:Q7KPP4]	|	0.432007	0.00285	0.012
WBGene00010130	vha-14	89.722	107.258	|		V-type proton ATPase subunit D [Source:UniProtKB/Swiss-Prot;Acc:P34462]	|	0.431762	0.00268	0.0114
WBGene00006829	unc-101	66.068	78.677	|		AP-1 complex subunit mu-1-I [Source:UniProtKB/Swiss-Prot;Acc:P35602]	|	0.430909	0.0119	0.0386
WBGene00016995	acly-1	19.199	23.039	|	Neurotransmitter's metabolism;Neurotransmitter's metabolism: ACh synthesis	Probable ATP-citrate synthase [Source:UniProtKB/Swiss-Prot;Acc:P53585]	|	0.430642	0.00197	0.00883
WBGene00020683	ribo-1	39.107	46.69	|		Dolichyl-diphosphooligosaccharide--protein glycosyltransferase subunit 1 [Source:UniProtKB/Swiss-Prot;Acc:Q9GZH4]	|	0.42997	0.00878	0.0302
WBGene00004951	spc-1	31.581	37.919	|		SPeCtrin [Source:UniProtKB/TrEMBL;Acc:G4S034]	|	0.429613	1.87e-05	0.000162
WBGene00020701	T22F7.1	21.708	25.988	|			|	0.429307	0.00744	0.0264
WBGene00010138	anoh-1	46.056	55.335	|	Chloride channel;Chloride channel: anoctamin-related	Anoctamin [Source:UniProtKB/TrEMBL;Acc:C0P286]	|	0.429086	0.00197	0.0088
WBGene00021209	hgap-1	16.185	19.415	|		Heterodimeric GTPase Activating Protein subunit [Source:UniProtKB/TrEMBL;Acc:V6CJZ0]	|	0.429063	0.000571	0.00313
WBGene00003746	nlp-8	198.934	238.501	|	Neuropeptide;Neuropeptide: Neuropeptide-like proteins	Neuropeptide-Like Protein [Source:UniProtKB/TrEMBL;Acc:Q93409]	|	0.428986	0.00426	0.0166
WBGene00004677	rrn-3.56	46388	55629.7	|			|	0.428866	0.0127	0.0408
WBGene00018837	F54G2.1	90.964	108.92	|			|	0.427842	3.73e-08	6.28e-07
WBGene00004132	ifet-1	23.693	28.358	|		Translational repressor ifet-1 [Source:UniProtKB/Swiss-Prot;Acc:Q20898]	|	0.427677	0.00924	0.0315
WBGene00021546	laat-1	19.144	22.769	|		Lysosomal amino acid transporter 1 [Source:UniProtKB/Swiss-Prot;Acc:Q95XZ6]	|	0.427281	0.0128	0.0411
WBGene00004880	smg-2	21.776	26.182	|		Regulator of nonsense transcripts 1 [Source:UniProtKB/Swiss-Prot;Acc:O76512]	|	0.42707	0.00481	0.0183
WBGene00004033	pkc-2	11.094	13.241	|		Protein kinase C-like 2 [Source:UniProtKB/Swiss-Prot;Acc:P90980]	|	0.426715	0.0114	0.0375
WBGene00001043	dnj-25	60.617	72.457	|		DNaJ domain (Prokaryotic heat shock protein) [Source:UniProtKB/TrEMBL;Acc:D7SFQ6]	|	0.426698	0.000151	0.000991
WBGene00018857	stau-1	50.993	60.821	|		STAUfen (DsRNA binding protein) homolog [Source:UniProtKB/TrEMBL;Acc:Q94239]	|	0.42637	0.000747	0.00393
WBGene00012811	Y43F8A.5	16.887	20.063	|			|	0.426342	0.00367	0.0147
WBGene00019747	ipla-1	18.363	21.978	|		Intracelllar PhosphoLipase A family [Source:UniProtKB/TrEMBL;Acc:G4SGU1]	|	0.426142	0.00105	0.00522
WBGene00021844	sec-11	91.892	108.889	|		Signal peptidase complex catalytic subunit SEC11 [Source:UniProtKB/TrEMBL;Acc:Q9N3D0]	|	0.426001	0.0157	0.0484
WBGene00011349	T01H3.3	13.657	16.285	|			|	0.425903	0.0126	0.0406
WBGene00003923	pas-2	72.331	86.068	|		Proteasome subunit alpha type-2 [Source:UniProtKB/Swiss-Prot;Acc:Q27488]	|	0.425709	0.00841	0.0292
WBGene00020207	T04B8.5	16.59	19.832	|	SLC transporter;SLC transporter: SLC12: cation-chloride cotransporter family		|	0.425488	0.0127	0.0408
WBGene00020322	T07F12.2	101.371	120.592	|			|	0.425002	0.00226	0.00991
WBGene00018582	F48A9.2	24.422	29.171	|			|	0.424748	0.000824	0.00426
WBGene00012894	tbc-17	19.439	23.245	|		TBC (Tre-2/Bub2/Cdc16) domain family [Source:UniProtKB/TrEMBL;Acc:Q7K711]	|	0.424557	0.0037	0.0148
WBGene00016170	tmem-131	10.085	12.046	|		TMEM (Human TransMEMbrane protein) homolog [Source:UniProtKB/TrEMBL;Acc:Q18264]	|	0.424388	0.00442	0.0171
WBGene00001038	dnj-20	13.192	15.771	|		DnaJ homolog dnj-20 [Source:UniProtKB/Swiss-Prot;Acc:Q8MPX3]	|	0.423889	0.00154	0.00718
WBGene00000514	ckb-4	100.373	119.103	|		Choline Kinase B [Source:UniProtKB/TrEMBL;Acc:Q9GZF3]	|	0.423508	0.00277	0.0117
WBGene00004945	sop-2	21.597	25.733	|		Polycomb protein sop-2 [Source:UniProtKB/Swiss-Prot;Acc:Q965H3]	|	0.422952	0.00228	0.00998
WBGene00020092	pcf-11	31.599	37.777	|		Polyadenylation and cleavage factor homolog 11 [Source:UniProtKB/Swiss-Prot;Acc:Q09345]	|	0.422912	0.000495	0.00276
WBGene00009353	sdhd-1	50.215	59.344	|		Putative succinate dehydrogenase [ubiquinone] cytochrome b small subunit, mitochondrial [Source:UniProtKB/Swiss-Prot;Acc:O62215]	|	0.422825	0.0149	0.0465
WBGene00013597	gpi-1	85.819	101.695	|		Glucose-6-phosphate isomerase [Source:UniProtKB/TrEMBL;Acc:Q9U1Q2]	|	0.422665	0.0138	0.0437
WBGene00008887	tbcd-1	10.001	11.962	|		Tubulin-specific chaperone D [Source:UniProtKB/Swiss-Prot;Acc:Q19493]	|	0.421007	0.00718	0.0257
WBGene00003962	pdi-1	110.797	131.231	|		Protein disulfide-isomerase 1 [Source:UniProtKB/Swiss-Prot;Acc:Q17967]	|	0.420817	0.00247	0.0106
WBGene00009799	lgc-47	25.474	30.333	|	Ligand-gated ion channel;Ligand-gated ion channel: ACC subgroup	Ligand-Gated ion Channel [Source:UniProtKB/TrEMBL;Acc:G5EEX8]	|	0.420714	0.000809	0.00419
WBGene00021444	ttc-7	17.612	20.945	|		TeTratriCopeptide repeat domain protein related [Source:UniProtKB/TrEMBL;Acc:F8WU09]	|	0.419793	0.00548	0.0205
WBGene00008120	C46F11.5	16.082	18.957	|			|	0.419649	0.00733	0.0261
WBGene00022703	ubxn-4	17.544	20.841	|		UBX domain-containing protein 4 [Source:UniProtKB/Swiss-Prot;Acc:P34631]	|	0.418809	0.0116	0.0378
WBGene00001574	gei-17	73.024	86.719	|		E3 SUMO-protein ligase gei-17 [Source:UniProtKB/Swiss-Prot;Acc:Q94361]	|	0.416591	2.77e-05	0.000227
WBGene00006590	toc-1	17.232	20.495	|	SLC transporter;SLC transporter: SLC30: cation diffusion facilitator (CDF) family	Similar to Transporter Of divalent Cations [Source:UniProtKB/TrEMBL;Acc:Q23281]	|	0.416528	0.00295	0.0123
WBGene00011312	trcs-2	121.997	145.578	|		TRansport of membrane to Cell Surface [Source:UniProtKB/TrEMBL;Acc:Q22047]	|	0.416296	0.00473	0.0181
WBGene00021536	Y42H9AR.1	24.982	29.529	|	PDZ domain protein;PDZ domain protein: PDZ only		|	0.416138	0.0136	0.0431
WBGene00015754	C14B9.8	13.309	15.778	|		Probable phosphorylase b kinase regulatory subunit alpha [Source:UniProtKB/Swiss-Prot;Acc:P34335]	|	0.416104	7.54e-06	7.24e-05
WBGene00011520	nhr-213	50.905	60.294	|		Nuclear hormone receptor family member nhr-213 [Source:UniProtKB/Swiss-Prot;Acc:O18048]	|	0.4159	0.000833	0.0043
WBGene00011071	R06F6.8	16.366	19.382	|		Guanine nucleotide exchange factor subunit R06F6.8 [Source:UniProtKB/Swiss-Prot;Acc:Q09417]	|	0.415625	0.00169	0.00775
WBGene00019777	M57.1	14.964	17.646	|			|	0.414609	0.0121	0.0392
WBGene00011885	T21B10.3	23.904	28.327	|			|	0.414064	0.000346	0.00202
WBGene00005320	srh-101	56.665	67.514	|			|	0.413359	0.0128	0.0409
WBGene00008882	F16B12.6	13.464	15.97	|			|	0.413346	0.00435	0.0169
WBGene00016397	maph-9	319.83	377.708	|			|	0.412931	0.000321	0.00189
WBGene00012135	T28F3.9	25.292	29.828	|			|	0.41237	0.0119	0.0388
WBGene00004317	rbg-1	40.952	48.529	|		Rab3 GTPase-activating protein catalytic subunit [Source:UniProtKB/Swiss-Prot;Acc:Q93538]	|	0.412349	0.00045	0.00254
WBGene00017120	tctn-1	83.265	98.276	|		TeCToNic (Vertebrate ciliogenesis factor) homolog [Source:UniProtKB/TrEMBL;Acc:O44478]	|	0.412207	0.000421	0.00239
WBGene00011498	T05G5.1	86.509	102.933	|			|	0.411662	0.0122	0.0396
WBGene00000183	arf-3	80.781	95.795	|		ADP-Ribosylation Factor related; ADP-ribosylation factor related (20.5 kD) (Arf-3) [Source:UniProtKB/TrEMBL;Acc:G5EFK4]	|	0.411218	0.00687	0.0247
WBGene00001632	gly-7	8.945	10.598	|		Probable N-acetylgalactosaminyltransferase 7 [Source:UniProtKB/Swiss-Prot;Acc:O61397]	|	0.411165	0.0118	0.0385
WBGene00019893	sgt-1	70.725	83.383	|		Small Glutamine-rich Tetratrico repeat protein [Source:UniProtKB/TrEMBL;Acc:Q21746]	|	0.410908	0.00596	0.022
WBGene00000162	apd-3	32.257	38.202	|		AP-3 complex subunit delta [Source:UniProtKB/TrEMBL;Acc:Q95X88]	|	0.410704	7.69e-06	7.38e-05
WBGene00012704	mlt-3	23.515	27.589	|			|	0.410563	0.00307	0.0128
WBGene00016162	crh-2	25.71	30.348	|		CREB Homolog [Source:UniProtKB/TrEMBL;Acc:Q4JFH9]	|	0.410551	0.00653	0.0237
WBGene00020407	chil-24	50.136	59.293	|		CHItinase-Like [Source:UniProtKB/TrEMBL;Acc:Q9TZF2]	|	0.408822	0.00128	0.00614
WBGene00007626	rnf-121	25.889	30.426	|		RING finger protein 121 [Source:UniProtKB/Swiss-Prot;Acc:Q09251]	|	0.408687	0.000864	0.00443
WBGene00000135	amt-3	38.071	45.097	|		Putative ammonium transporter 3 [Source:UniProtKB/Swiss-Prot;Acc:Q21565]	|	0.408626	0.00416	0.0162
WBGene00022696	ZK328.7	221.007	260.317	|	Sensory cilia transport;Sensory cilia transport: IFT-A	Tetratricopeptide repeat protein 21 homolog [Source:UniProtKB/Swiss-Prot;Acc:Q20255]	|	0.408421	0.000239	0.00147
WBGene00022419	Y102A11A.9	863.83	1018.71	|			|	0.40811	0.00102	0.0051
WBGene00018161	F38A5.2	23.96	28.141	|			|	0.407426	0.000253	0.00154
WBGene00000549	cls-2	37.675	44.186	|			|	0.405847	0.000322	0.00189
WBGene00009190	F27D4.6	11.404	13.466	|			|	0.405167	0.000691	0.00368
WBGene00003598	nhl-2	14.466	17.067	|		NHL (Ring finger b-box coiled coil) domain containing [Source:UniProtKB/TrEMBL;Acc:Q19818]	|	0.402889	0.00976	0.0329
WBGene00015743	soap-1	13.856	16.305	|		Sorting Of Apical Proteins [Source:UniProtKB/TrEMBL;Acc:O01485]	|	0.402313	0.00133	0.00634
WBGene00004111	pqn-21	10.363	12.126	|		Prion-like-(Q/N-rich)-domain-bearing protein [Source:UniProtKB/TrEMBL;Acc:S6F562]	|	0.401712	0.00233	0.0101
WBGene00008927	snx-17	34.615	40.599	|		Sorting nexin-17 homolog [Source:UniProtKB/Swiss-Prot;Acc:Q19532]	|	0.40113	0.000264	0.0016
WBGene00013709	csnk-1	35.07	41.124	|		Casein kinase I gamma [Source:UniProtKB/Swiss-Prot;Acc:Q8WQ99]	|	0.401081	0.00115	0.00562
WBGene00003924	pas-3	103.519	121.708	|		Proteasome subunit alpha type-4 [Source:UniProtKB/Swiss-Prot;Acc:Q9N599]	|	0.4009	0.00955	0.0324
WBGene00008262	ril-1	122.93	144.483	|		RNAi-Induced Longevity [Source:UniProtKB/TrEMBL;Acc:O17694]	|	0.399614	0.00131	0.00625
WBGene00012441	glb-28	76.273	89.933	|	Gas receptors;Gas receptors: Globin	GLoBin related [Source:UniProtKB/TrEMBL;Acc:Q9U2R5]	|	0.399402	0.011	0.0363
WBGene00009045	F22B5.10	65.324	76.485	|		Calcium load-activated calcium channel homolog [Source:UniProtKB/Swiss-Prot;Acc:Q19714]	|	0.398969	0.00798	0.0279
WBGene00016311	efr-3	12.651	14.858	|			|	0.398853	0.00381	0.0152
WBGene00019733	M02E1.1	27.728	32.702	|			|	0.398784	0.00363	0.0146
WBGene00002179	jph-1	60.279	70.365	|		JunctoPHilin [Source:UniProtKB/TrEMBL;Acc:Q22667]	|	0.398641	0.000313	0.00184
WBGene00013283	sre-25	74.532	87.303	|			|	0.397905	0.00854	0.0296
WBGene00003886	osm-6	182.048	213.319	|	Sensory cilia transport;Sensory cilia transport: IFT-B	Osm-6 protein [Source:UniProtKB/TrEMBL;Acc:G5EDF6]	|	0.397435	0.00501	0.019
WBGene00012553	cox-5A	115.358	134.747	|		Cytochrome c oxidase subunit 5A, mitochondrial [Source:UniProtKB/Swiss-Prot;Acc:P55954]	|	0.397284	0.00567	0.021
WBGene00011940	T23B5.3	30.304	35.458	|			|	0.397239	0.00412	0.0161
WBGene00015357	C02F12.8	21.501	25.101	|			|	0.395965	0.00549	0.0205
WBGene00010236	F58B4.3	3138.32	3656.76	|			|	0.395529	0.00449	0.0173
WBGene00002215	klc-2	81.537	95.177	|		Kinesin light chain [Source:UniProtKB/Swiss-Prot;Acc:P46822]	|	0.39372	0.00388	0.0154
WBGene00022722	tomm-70	16.025	18.737	|		Mitochondrial import receptor subunit tomm-70 [Source:UniProtKB/Swiss-Prot;Acc:Q02335]	|	0.393546	0.0147	0.0461
WBGene00011348	T01H3.2	13.561	15.829	|			|	0.391518	0.00859	0.0297
WBGene00019305	snap-29	72.463	84.523	|	Synaptic release machinery;Synaptic release machinery: Q-SNARE:Qb/c subtype	Soluble NSF attachment protein 29 [Source:UniProtKB/Swiss-Prot;Acc:P83351]	|	0.391359	0.00397	0.0157
WBGene00018520	F46H5.4	14.708	17.237	|			|	0.390508	0.0055	0.0205
WBGene00019301	K02D10.1	49.93	58.188	|		Putative NipSnap protein K02D10.1 [Source:UniProtKB/Swiss-Prot;Acc:P34492]	|	0.390191	0.015	0.0468
WBGene00004460	rpn-3	59.514	69.333	|		26S proteasome non-ATPase regulatory subunit 3 [Source:UniProtKB/Swiss-Prot;Acc:Q04908]	|	0.389498	0.00242	0.0105
WBGene00020199	T03G11.6	17.902	20.786	|			|	0.389089	0.00751	0.0266
WBGene00010842	ymel-1	36.781	42.582	|		ATP-dependent zinc metalloprotease YME1 homolog [Source:UniProtKB/Swiss-Prot;Acc:P54813]	|	0.388957	0.00865	0.0299
WBGene00013994	ZK524.4	61.674	72.025	|			|	0.388885	0.000936	0.00474
WBGene00045192	aho-3	38.51	44.682	|		Alpha/beta hydrolase domain-containing protein aho-3 [Source:UniProtKB/Swiss-Prot;Acc:Q21221]	|	0.388229	0.00954	0.0323
WBGene00011771	T14G8.3	27.858	32.318	|			|	0.387851	0.00463	0.0178
WBGene00004760	sel-2	28.137	32.783	|		Putative neurobeachin homolog [Source:UniProtKB/Swiss-Prot;Acc:Q19317]	|	0.384896	0.00108	0.00532
WBGene00018681	denn-4	32.927	38.239	|		DENN domain type RAB GEF [Source:UniProtKB/TrEMBL;Acc:U4PRB8]	|	0.384661	0.0094	0.032
WBGene00022019	sut-2	17.257	20.127	|		Zinc finger CCCH domain-containing protein 14 [Source:UniProtKB/Swiss-Prot;Acc:Q95XU6]	|	0.384258	0.0109	0.0361
WBGene00015767	hex-2	48.449	56.238	|		Hexosaminidase [Source:UniProtKB/TrEMBL;Acc:G5EFL1]	|	0.384141	0.00754	0.0266
WBGene00000376	ccr-4	124.689	144.297	|		CCR (Yeast CCR4/NOT complex component) homolog [Source:UniProtKB/TrEMBL;Acc:A0A061AD13]	|	0.384119	0.0041	0.0161
WBGene00001058	dpf-5	79.239	91.939	|	Auxiliary subunit for:: Voltage-gated K channels;Neuropeptide processing;Neuropeptide processing: Degradation	Dipeptidyl Peptidase Four (IV) family [Source:UniProtKB/TrEMBL;Acc:Q9TYX1]	|	0.383531	1.63e-05	0.000143
WBGene00017961	nhr-180	97.606	112.908	|		Nuclear Hormone Receptor family [Source:UniProtKB/TrEMBL;Acc:O17131]	|	0.382657	0.000443	0.0025
WBGene00000293	cap-2	83.857	97.168	|		F-actin-capping protein subunit beta [Source:UniProtKB/Swiss-Prot;Acc:P34686]	|	0.381547	0.00778	0.0273
WBGene00021534	mvk-1	40.089	46.534	|		MeValonate Kinase [Source:UniProtKB/TrEMBL;Acc:Q65XX9]	|	0.380808	0.00507	0.0191
WBGene00000149	apl-1	309.589	356.18	|		Amyloid-beta-like protein [Source:UniProtKB/Swiss-Prot;Acc:Q10651]	|	0.379501	0.00198	0.00885
WBGene00014025	asna-1	41.723	47.965	|		ATPase asna-1 [Source:UniProtKB/Swiss-Prot;Acc:P30632]	|	0.37721	0.0087	0.03
WBGene00016976	C56E10.3	94.66	108.535	|			|	0.376961	0.00895	0.0307
WBGene00003564	ncs-2	94.85	109.77	|	Calcium binding protein;Calcium binding protein: NCS family	Neuronal calcium sensor 2 [Source:UniProtKB/Swiss-Prot;Acc:P36609]	|	0.376636	0.0031	0.0128
WBGene00002192	kin-4	37.562	43.621	|	PDZ domain protein	KIN-4 protein; Protein KINase [Source:UniProtKB/TrEMBL;Acc:G5EFA4]	|	0.376622	0.00777	0.0273
WBGene00006201	str-155	136.442	156.846	|		Seven TM Receptor [Source:UniProtKB/TrEMBL;Acc:Q9N2T5]	|	0.374769	0.0146	0.0459
WBGene00019324	K02F2.5	1742.99	1996.69	|			|	0.373539	0.000501	0.00279
WBGene00006604	tra-1	67.508	77.842	|		Sex-determining transformer protein 1 [Source:UniProtKB/Swiss-Prot;Acc:P34708]	|	0.373515	0.00498	0.0189
WBGene00004807	skr-1	566.583	649.35	|		Skp1-related protein [Source:UniProtKB/Swiss-Prot;Acc:G5ECU1]	|	0.373371	0.00444	0.0172
WBGene00008431	piga-1	25.243	28.865	|		PhosphatidylInositol-Glycan biosynthesis class A protein [Source:UniProtKB/TrEMBL;Acc:Q18993]	|	0.373155	0.01	0.0337
WBGene00020196	T03G11.3	473.534	543.16	|		Zinc finger C2HC domain-containing protein T03G11.3 [Source:UniProtKB/Swiss-Prot;Acc:Q22122]	|	0.372411	0.000121	0.000821
WBGene00005641	sro-1	56.733	65.691	|		Serpentine Receptor, class O (Opsin) [Source:UniProtKB/TrEMBL;Acc:Q18929]	|	0.371852	0.00646	0.0235
WBGene00021528	gbb-1	23.796	27.339	|	Metabotropic neurotransmitter receptor;Metabotropic neurotransmitter receptor: Ligand:GABA;Metabotropic neurotransmitter receptor: metabotropic GABA receptors	Gamma-aminobutyric acid type B receptor subunit 1 [Source:UniProtKB/Swiss-Prot;Acc:H2L0Q3]	|	0.371778	0.0111	0.0365
WBGene00001648	goa-1	148.037	170.108	|	GPCR signalling;GPCR signalling: Gα	Guanine nucleotide-binding protein G(o) subunit alpha [Source:UniProtKB/Swiss-Prot;Acc:P51875]	|	0.370893	0.000161	0.00105
WBGene00006753	unc-14	203.528	232.875	|		UNC-14 [Source:UniProtKB/TrEMBL;Acc:G5ECQ1]	|	0.370521	0.00113	0.00554
WBGene00001056	dpf-3	19.936	23.005	|		Dipeptidyl Peptidase Four (IV) family [Source:UniProtKB/TrEMBL;Acc:Q965K3]	|	0.370334	0.0115	0.0378
WBGene00010433	H40L08.1	103.941	119.452	|			|	0.37022	0.000397	0.00227
WBGene00015206	B0495.7	57.985	66.642	|		Putative endoplasmic reticulum metallopeptidase 1-A [Source:UniProtKB/Swiss-Prot;Acc:Q09216]	|	0.37009	0.000645	0.00347
WBGene00000879	cyn-3	194.597	224.034	|		Peptidyl-prolyl cis-trans isomerase 3 [Source:UniProtKB/Swiss-Prot;Acc:P52011]	|	0.370033	0.00789	0.0276
WBGene00021333	Y34D9A.8	233.909	268.029	|			|	0.369103	0.000452	0.00255
WBGene00016005	ift-74	228.333	262.663	|	Sensory cilia transport;Sensory cilia transport: IFT-B	IFT (Chlamydomonas IntraFlagellar Transport) homolog [Source:UniProtKB/TrEMBL;Acc:A0A2C9C2L6]	|	0.368867	0.00052	0.00288
WBGene00002201	kin-18	21.213	24.39	|		Serine/threonine-protein kinase SULU [Source:UniProtKB/Swiss-Prot;Acc:P46549]	|	0.368005	0.000867	0.00444
WBGene00019831	R02F2.1	386.25	442.456	|			|	0.367427	0.012	0.039
WBGene00005389	srh-173	203.226	231.882	|	Chemoreceptor;Chemoreceptor: Srh class	Serpentine Receptor, class H [Source:UniProtKB/TrEMBL;Acc:M1ZK04]	|	0.366249	0.00532	0.02
WBGene00011867	chc-1	91.701	105.387	|		Probable clathrin heavy chain 1 [Source:UniProtKB/Swiss-Prot;Acc:P34574]	|	0.364817	0.00143	0.00674
WBGene00007333	ufd-3	58.166	66.546	|		Ubiquitin fusion degradation protein 3 homolog [Source:UniProtKB/Swiss-Prot;Acc:G5EES6]	|	0.364591	0.00192	0.00863
WBGene00021362	Y37E11AL.6	17.044	19.472	|	Cadherin	FlaMIngo-Like [Source:UniProtKB/TrEMBL;Acc:U4PRL9]	|	0.364533	0.0121	0.0394
WBGene00017981	figl-1	38.556	44.033	|		Fidgetin-like protein 1 [Source:UniProtKB/Swiss-Prot;Acc:O16299]	|	0.363589	0.00442	0.0171
WBGene00006373	syx-5	39.329	44.941	|	Synaptic release machinery;Synaptic release machinery: Q-SNARE:Qa subtype	Putative syntaxin-5 [Source:UniProtKB/Swiss-Prot;Acc:Q20797]	|	0.363379	0.0124	0.0401
WBGene00006527	tax-6	209.271	239.06	|		Serine/threonine-protein phosphatase 2B catalytic subunit [Source:UniProtKB/Swiss-Prot;Acc:Q0G819]	|	0.363126	2.95e-05	0.000241
WBGene00004458	rpn-1	51.083	58.574	|		26S proteasome non-ATPase regulatory subunit 2 [Source:UniProtKB/TrEMBL;Acc:Q9GZH5]	|	0.361985	0.0151	0.0469
WBGene00008441	usp-50	16.334	18.65	|		Ubiquitin Specific Protease [Source:UniProtKB/TrEMBL;Acc:G5EBW2]	|	0.360857	0.0109	0.0362
WBGene00010897	lact-3	25.923	29.647	|		Beta-LACTamase domain containing [Source:UniProtKB/TrEMBL;Acc:Q21569]	|	0.360365	0.0126	0.0405
WBGene00004318	rbg-2	41.872	47.83	|		Rab3 GTPase-activating protein regulatory subunit [Source:UniProtKB/Swiss-Prot;Acc:Q22670]	|	0.359756	0.0123	0.0398
WBGene00000837	cul-2	36.614	41.648	|		Cullin-2 [Source:UniProtKB/Swiss-Prot;Acc:Q17390]	|	0.359008	0.00822	0.0286
WBGene00001177	egl-8	74.878	85.667	|		1-phosphatidylinositol 4,5-bisphosphate phosphodiesterase beta egl-8 [Source:UniProtKB/Swiss-Prot;Acc:G5EBH0]	|	0.358771	0.00653	0.0237
WBGene00004338	rfc-2	93.745	107.248	|		RFC (DNA replication factor) family [Source:UniProtKB/TrEMBL;Acc:O44175]	|	0.358708	0.00633	0.0231
WBGene00271778	T01A4.9	2977.21	3384.78	|			|	0.356947	0.00139	0.00656
WBGene00014159	arrd-4	197.356	225.442	|	GPCR signalling;GPCR signalling: Arrestins	ARRestin Domain protein [Source:UniProtKB/TrEMBL;Acc:Q23672]	|	0.356627	0.0114	0.0374
WBGene00004313	rbc-1	33.19	38.069	|		RaBConnectin related [Source:UniProtKB/TrEMBL;Acc:D6R8W9]	|	0.356492	0.00951	0.0322
WBGene00004461	rpn-5	66.831	75.973	|		Proteasome Regulatory Particle, Non-ATPase-like [Source:UniProtKB/TrEMBL;Acc:Q19324]	|	0.356171	0.00131	0.00626
WBGene00016879	cnnm-1	24.932	28.385	|		Metal transporter cnnm-1 [Source:UniProtKB/Swiss-Prot;Acc:A3QM97]	|	0.354412	0.00495	0.0188
WBGene00015927	dyci-1	20.458	23.204	|	Dynein motors;Dynein motors: Intermediate chain;Sensory cilia transport;Sensory cilia transport: IFT-Dynein	DYnein Chain, light Intermediate [Source:UniProtKB/TrEMBL;Acc:O45087]	|	0.354354	0.00126	0.00605
WBGene00016744	bbs-9	167.579	189.879	|	Sensory cilia transport;Sensory cilia transport: BBSome		|	0.353726	0.0123	0.0399
WBGene00018319	hda-6	43.946	49.998	|		Histone deacetylase 6 [Source:UniProtKB/Swiss-Prot;Acc:Q20296]	|	0.353429	0.00871	0.03
WBGene00021372	ugt-45	29.676	33.616	|		UDP-GlucuronosylTransferase [Source:UniProtKB/TrEMBL;Acc:U4PLL6]	|	0.353235	0.0134	0.0426
WBGene00014079	ZK792.7	91.955	104.223	|			|	0.352922	0.00799	0.0279
WBGene00016395	spcs-1	142.853	160.861	|		Probable signal peptidase complex subunit 1 [Source:UniProtKB/Swiss-Prot;Acc:O44953]	|	0.352791	0.00749	0.0265
WBGene00004752	sec-5	12.385	14.068	|		Exocyst complex component 2 [Source:UniProtKB/Swiss-Prot;Acc:Q22706]	|	0.351895	0.0162	0.0495
WBGene00012326	W07E11.1	29.536	33.62	|			|	0.351453	0.0104	0.0348
WBGene00000832	ctn-1	41.467	47.007	|		Alpha-CaTuliN (Catenin/vinculin related) [Source:UniProtKB/TrEMBL;Acc:Q8T3U1]	|	0.351447	0.00209	0.00929
WBGene00013407	Y63D3A.8	22.766	25.889	|			|	0.351228	0.0133	0.0425
WBGene00006803	unc-70	23.385	26.548	|		Spectrin beta chain [Source:UniProtKB/TrEMBL;Acc:E0AHA7]	|	0.350722	0.00749	0.0265
WBGene00013518	Y73F8A.5	42.151	47.676	|			|	0.350699	0.0113	0.0372
WBGene00017274	F08F8.9	75	84.833	|			|	0.349866	0.000167	0.00108
WBGene00004751	sea-2	109.226	124.221	|		Signal Element on Autosome [Source:UniProtKB/TrEMBL;Acc:A0A0K3ARE6]	|	0.349305	0.000887	0.00453
WBGene00003583	ndx-6	29.121	32.976	|		Putative nudix hydrolase 6 [Source:UniProtKB/Swiss-Prot;Acc:Q09297]	|	0.34928	0.0128	0.0411
WBGene00021395	pnc-1	349.038	394.047	|		Pyrazinamidase and NiCotinamidase [Source:UniProtKB/TrEMBL;Acc:A7WK39]	|	0.349153	9.39e-05	0.000658
WBGene00000264	brc-1	36.196	40.795	|		Breast cancer type 1 susceptibility protein homolog [Source:UniProtKB/Swiss-Prot;Acc:B6VQ60]	|	0.348976	0.00815	0.0284
WBGene00004047	plx-1	9.603	10.823	|		PLeXin [Source:UniProtKB/TrEMBL;Acc:U4PC90]	|	0.348516	0.00535	0.02
WBGene00019871	R04E5.8	31.589	35.874	|			|	0.348373	0.011	0.0364
WBGene00000564	cnk-1	15.99	18.096	|	PDZ domain protein	Connector enhancer of kinase suppressor of ras [Source:UniProtKB/Swiss-Prot;Acc:G5EEW9]	|	0.347485	0.00719	0.0257
WBGene00004459	rpn-2	70.953	80.137	|		26S proteasome non-ATPase regulatory subunit 1 [Source:UniProtKB/Swiss-Prot;Acc:Q18115]	|	0.346852	0.0021	0.0093
WBGene00001179	egl-10	32.062	36.263	|	GPCR signalling;GPCR signalling: RGS family	Regulator of G-protein signaling egl-10 [Source:UniProtKB/Swiss-Prot;Acc:P49809]	|	0.346677	0.0126	0.0406
WBGene00021349	arl-13	442.812	499.615	|		ADP-ribosylation factor-like protein 13B [Source:UniProtKB/Swiss-Prot;Acc:H2L0N8]	|	0.346671	0.000794	0.00413
WBGene00002066	ifg-1	42.076	47.522	|		Initiation Factor 4G (eIF4G) family [Source:UniProtKB/TrEMBL;Acc:B5BM23]	|	0.342966	0.000638	0.00344
WBGene00000912	daf-16	82.358	92.762	|		Forkhead box protein O [Source:UniProtKB/Swiss-Prot;Acc:O16850]	|	0.341241	0.000918	0.00467
WBGene00004167	pqn-87	67.795	76.221	|		Prion-like-(Q/N-rich)-domain-bearing protein [Source:UniProtKB/TrEMBL;Acc:G2HK03]	|	0.339602	0.00366	0.0147
WBGene00002000	hrp-2	64.427	72.615	|		HnRNP A1 homolog [Source:UniProtKB/TrEMBL;Acc:B3KYC2]	|	0.339499	0.00106	0.00524
WBGene00001129	dyf-13	202.902	227.572	|	Sensory cilia transport;Sensory cilia transport: IFT-B	Intraflagellar transport protein 56 homolog [Source:UniProtKB/Swiss-Prot;Acc:Q95QT8]	|	0.339114	0.0126	0.0406
WBGene00017080	lec-12	99.921	112.697	|		Galectin [Source:UniProtKB/TrEMBL;Acc:A0A0K3AUS0]	|	0.338874	0.0138	0.0438
WBGene00019504	K07H8.2	29.231	32.965	|			|	0.338632	0.0159	0.0489
WBGene00016326	ubr-1	18.097	20.374	|		E3 ubiquitin-protein ligase ubr-1 [Source:UniProtKB/Swiss-Prot;Acc:P91133]	|	0.33762	0.00271	0.0115
WBGene00004143	pqn-59	83.848	94.306	|		Prion-like-(Q/N-rich)-domain-bearing protein [Source:UniProtKB/TrEMBL;Acc:O61708]	|	0.337515	0.00445	0.0172
WBGene00004862	sma-9	58.269	65.682	|		SMAll [Source:UniProtKB/TrEMBL;Acc:B5U8M3]	|	0.335663	0.00183	0.00829
WBGene00001087	dpy-28	19.6	22.035	|		Condensin complex subunit 1 [Source:UniProtKB/Swiss-Prot;Acc:Q9U2M1]	|	0.33463	0.000702	0.00373
WBGene00008990	smgl-1	11.236	12.61	|			|	0.333573	0.000964	0.00486
WBGene00015499	inst-1	12.214	13.654	|		INtegrator complex SubuniT 1 homolog [Source:UniProtKB/TrEMBL;Acc:O01483]	|	0.328002	0.0109	0.0363
WBGene00009661	patr-1	32.391	36.127	|			|	0.327124	0.00399	0.0158
WBGene00003186	mek-2	30.805	34.356	|		Dual specificity mitogen-activated protein kinase kinase mek-2 [Source:UniProtKB/Swiss-Prot;Acc:Q10664]	|	0.323639	0.0151	0.0469
WBGene00002083	inf-1	330.115	367.501	|		Eukaryotic initiation factor 4A [Source:UniProtKB/Swiss-Prot;Acc:P27639]	|	0.322536	0.0161	0.0494
WBGene00009454	F36A2.7	256.587	283.946	|			|	0.32065	0.0077	0.0271
WBGene00007030	epc-1	236.83	261.395	|		Enhancer of PolyComb-like; Enhancer of polycomb [Source:UniProtKB/TrEMBL;Acc:G5EC14]	|	0.318916	0.00876	0.0302
WBGene00013606	cand-1	28.912	31.962	|		Cullin-associated NEDD8-dissociated protein 1 [Source:UniProtKB/Swiss-Prot;Acc:G5ED41]	|	0.318345	0.0018	0.00815
WBGene00017184	ncam-1	33.553	37.293	|	Extracellular Immunoglobulin;Extracellular Immunoglobulin: Ig domain proteins	NCAM (Neural cell adhesion molecule) homolog [Source:UniProtKB/TrEMBL;Acc:Q8MQ86]	|	0.317997	0.00217	0.00956
WBGene00000041	aco-2	46.355	51.51	|		Probable aconitate hydratase, mitochondrial [Source:UniProtKB/Swiss-Prot;Acc:P34455]	|	0.317741	0.00936	0.0318
WBGene00009660	F43G6.8	240.346	265.936	|			|	0.316781	0.00962	0.0325
WBGene00003905	pad-1	40.697	45.366	|			|	0.316758	0.0113	0.0372
WBGene00003715	nhr-125	75.135	82.982	|		Nuclear hormone receptor family member nhr-125 [Source:UniProtKB/Swiss-Prot;Acc:O17082]	|	0.315722	0.00412	0.0161
WBGene00001580	gex-3	18.917	20.888	|		Membrane-associated protein gex-3 [Source:UniProtKB/Swiss-Prot;Acc:P55163]	|	0.315125	0.000299	0.00177
WBGene00007683	C18E9.2	128.975	142.372	|			|	0.314594	0.00566	0.021
WBGene00018612	disl-2	31.046	34.282	|		DIS3-like exonuclease 2 [Source:UniProtKB/Swiss-Prot;Acc:Q09568]	|	0.31361	0.0123	0.0399
[truncated: 1,538 more rows]

## Sheet: Legend
Worm-ID	Name	Average expression WT (tpm)	Average expression qui-1 (tpm)	|	Assigned neural function	Gene descritpion	|	log2FC	p-valule	q-value
Gene's identification using WormBase ID	Gene's identication	Contains the average normalized gene expression of FACSed ADL neurons from wild type animals	Contains the average normalized gene expression of FACSed ADL neurons from qui-1 mutants		Genes are assigned to a particular neuronal gene class according to Hobert, 2013	Description of corresponding protein for protein-coding genes		Fold change between average gene expression in wild type and qui-1 mutants	Statistical significance is represented using p value	Statistical significance is represented using q value which accounts for multiple testing
		Gene expression data are expressed as transcript per million (tpm)	Gene expression data are expressed as transcript per million (tpm)					The fold change is expressed as a log2		Only genes with a q value <0.05 are listed
		Genes expressed below a 10 tpm cut-off in both wild type and qui-1 samples are excluded	Genes expressed below 10 tpm cut-off in both wild type and qui-1 samples are excluded
