# Supplementary material for: Impairing one sensory modality enhances another by reconfiguring peptidergic signalling in Caenorhabditis elegans
Source: eLife. 2022 Feb 24;11:e68040. doi: 10.7554/eLife.68040 (PMC8871372; doi:10.7554/eLife.68040)
Supplement: Supplementary file 6. [file elife-68040-supp6.xlsx]

## Sheet: Sheet1
Strain	Genotype	Figure
N2	WT	Figure 1C - 1D - 1S1B - 2A,B,C - 4A,B,C - 4S1A,B,C - 4S2A,B - 5S2A,B,C
AX6954	qui-1(db104) IV.	Figure 1C - 1D -1S1B - 2A,B,C - 5S2A,B,D
AX7249	qui-1(db104) IV; Ex[qui-1 gDNA fosmid; unc-122p:gfp]	Figure 1D
AX7961	qui-1(syb2030)[3xFLAG::mNeonGreen::TurboID::qui-1] IV.	Figure 1E
RB2563	qui-1(ok3571) IV.	Figure 1S1B
AX7629	dbEx614[gcy-37p:YC2.60; unc-122p:rfp]	Figure 1S1C
AX8326	qui-1(db104) IV; dbEx614[gcy-37p:YC2.60; unc-122p:rfp]	Figure 1S1C
AX1907	dbEx(pgcy-32::YC3.60 lin-15(+))	Figure 1S1D,E
AX8321	qui-1(db104) IV; dbEx(pgcy-32::YC3.60 lin-15(+))	Figure 1S1D,E
AX3446	dbEx637[ncs-1p::Cre; flp-21p:loxP:STOP:loxP:YC2.60; unc-122p:rfp]	Figure 1SF
AX8328	qui-1(db104) IV; dbEx637[ncs-1p::Cre; flp-21p:loxP:STOP:loxP:YC2.60; unc-122p:rfp]	Figure 1SF
AX7246	qui-1(db104) IV; Ex[sra-6p:qui-1; unc-122p:gfp]	Figure 2A
AX7247	qui-1 (db104) IV; Ex[∆sre-1p:qui-1; unc-122p:gfp]	Figure 2B
AX7248	qui-1(db104) IV; Ex[sra-6p;qui-1; ∆sre-1(delta)p:qui-1; unc-122p:gfp]	Figure 2C
AX6479	dbEx941[∆sre-1p::GCaMP3v500; unc-122p:rfp]	Figure 2D
AX8329	qui-1(db104) IV; dbEx941[∆sre-1p::GCaMP3v500; unc-122p:rfp]	Figure 2D
AX7668	dbEx1149[shr-220p:GCaMP6s(Ce):mKate2; lin-44p:gfp]	Figure 2E
AX7712	qui-1(db104) IV; dbEx1149[shr-220p:GCaMP6s(Ce):mKate2; lin-44p:gfp]	Figure 2E
AX7288	ftIs25[srh-220p:daf-28::mCherry; myo-2p:gfp; unc-122p:gfp]	Figure 3A,C,E - 4D,E - 4S2E - 5C,D,E
AX7287	qui-1(db104) IV; ftIs25[srh-220p:daf-28::mCherry; myo-2p:gfp; unc-122p:gfp]	Figure 3A,C,D,E,F - 5C,E
AX7367	qui-1(db104) IV; ftIs25[srh-220p:daf-28::mCherry; myo-2p:gfp; unc-122p:gfp]; Ex[∆sre-1p:qui-1;unc-122p:gfp]	Figure 3A
AX7672	dbEx1151[srh-220p:ida-1::gfp; srh-220p:mKate2; lin-44p:gfp]	Figure 3A - 3S1A,B,C
AX7714	qui-1(db104) IV; dbEx1151[srh-220p:ida-1::gfp; srh-220p:mKate2; lin-44p:gfp]	Figure 3B - 3S1A,B,C
AX7499	qui-1(db104) IV; gcy-35(ok769) I; ftIs25[srh-220p:daf-28::mCherry; myo-2p:gfp; unc-122p:gfp]	Figure 3C,D
AX7887	qui-1(db104) IV; gcy-35(ok769) I; ftIs25[srh-220p:daf-28::mCherry; myo-2p:gfp; unc-122p:gfp]; dbEx1202[gcy-32p:gcy-35:sl2:gfp; lin-44p:gfp]	Figure 3D
AX7888	qui-1(db104) IV; gcy-35(ok769) I; ftIs25[srh-220p:daf-28::mCherry; myo-2p:gfp; unc-122p:gfp]; dbEx1199[flp-8p:gcy-35:sl2:gfp; lin-44p:gfp]	Figure 3D
AX7468	qui-1(db104) IV; npr-1(ad609) X; lin-15(n765ts) X; dbEx [ncs-1p:Cre; flp-21p:LoxP:STOP:LoxP:npr-1(215V):sl2:gfp; lin-15(+)]; ftIs25[srh-220p:daf-28::mChery; myo-2p:gfp; unc-122p:gfp]	Figure 3F
MT3645	bbs-7/osm-12 (n1606) III.	Figure 4A
AX7169	wrt-6(db102) X.	Figure 4B
AX7460	wrt-6(db102) X; dbEx1081[wrt-6 gDNA fosmid; unc-122p:gfp]	Figure 4B
AX7176	fig-1(db1239) V.	Figure 4C
VC40444	fig-1(gk640644) V.	Figure 4C
tm10270	fig-1(tm2079) V.	Figure 4C
AX7356	wrt-6(db102) X; ftIs25[srh-220p:daf-28::mChery; myo-2p:gfp; unc-122p:gfp]	Figure 4D
AX7357	fig-1 (db1239) V; ftIs25[srh-220p:daf-28::mChery; myo-2p:gfp; unc-122p:gfp]	Figure 4D
AX7289	bbs-7 (n1606) III; ftIs25[srh-220p:daf-28::mChery; myo-2p:gfp; unc-122p:gfp]	Figure 4E
AX8228	osm-6::aid(db1359) V; ftIs25[srh-220p:daf-28::mChery; myo-2p:gfp; unc-122p:gfp]	Figure 4F, 4S2E
AX8227	osm-6::aid(db1359) V; ftIs25[srh-220p:daf-28::mChery; myo-2p:gfp; unc-122p:gfp]; dbEx1317[srh-220p:TIR1:tagBfp; lin-44p:gfp]	Figure 4F,G
VC837	bbs-1(ok1111) I.	Figure 4S1A,C
VC1569	bbs-2(ok2053) IV.	Figure 4S1B,C
AX8225	osm-6::aid(db1359) V.	Figure 4S2A,B
AX8224	osm-6::aid(db1359) V; dbEx1317[srh-220p:TIR1:tagBfp; lin-44p:gfp]	Figure 4S2C,D
AX8226	dbEx1317[srh-220p:TIR1:tagBfp; lin-44p:gfp]	Figure 4S2C,D
PR811	osm-6 (p811) V.	Figure 4S2B
AX7866	dbIs47[srh-220p:mKate2; lin-44p:gfp]	Figure 5A,B - 5S1A,B,D,E
AX7894	qui-1(db104) IV; dbIs47[srh-220p:mKate2; lin-44p:gfp]	Figure 5A,B - 5S1B,D,E
AX8036	qui-1(db104) IV; npr-22(ok1598) IV; ftIs25[srh-220p:daf-28::mCherry; myo-2p:gfp; unc-122p:gfp]	Figure 5C
AX8037	qui-1(db104) IV; npr-22(ok1598) IV; ftIs25[srh-220p:daf-28::mCherry; myo-2p:gfp; unc-122p:gfp]; dbEx1230[srh-220p:npr-22(b):sl2:mKate2; lin-44p:gfp]	Figure 5C
AX8007	ftIs25[srh-220p:daf-28::mCherry; myo-2p:gfp; unc-122p:gfp]; dbEx1230[srh-220p:npr-22(b):sl2:mKate2; lin-44p:gfp]	Figure 5D
AX8034	qui-1(db104) IV; tkr-1(ok2886) III; ftIs25[srh-220p:daf-28::mCherry; myo-2p:gfp; unc-122p:gfp]	Figure 5E
AX8237	qui-1(db104) IV; npr-22(ok1598) IV.	Figure 5S2A
AX8172	qui-1(db104) IV; tkr-1(ok2886) III.	Figure 5S2B
AX8164	dbEx1230[srh-220p:npr-22(b):sl2:mKate2; lin-44p:gfp]	Figure 5S2C
AX8308	qui-1(db104) IV; dbEx1327[srh-220p:TeTX:mKate; lin-44p:gfp]	Figure 5S2D
